# Supplementary material for: A one-pot, metal-free approach to bicyclic 2-pyridones
Source: Royal Society of Chemistry journal article supplement (doi:10.1039/c7qo00406k), 2017-01-01
Supplement: c7qo00406k1.pdf [file c7qo00406k1.pdf]

## Supporting Information

# A One-pot, Metal-free Approach to Bicyclic 2-Pyridones

Somsak Ruchirawat<sup>a,b,c</sup> and Wannaporn Disadee<sup>a,\*</sup>

<sup>a</sup> Laboratory of Medicinal Chemistry, Chulabhorn Research Institute, Lak Si, Bangkok 10210, Thailand

<sup>b</sup> Program in Chemical Biology, Chulabhorn Graduate Institute, Lak Si, Bangkok 10210, Thailand

<sup>c</sup> the Center of Excellence on Environmental Health and Toxicology (EHT), Bangkok 10400, Thailand

wannapor@cri.or.th

### Table of Contents

|                                                                                                                                            |      |
|--------------------------------------------------------------------------------------------------------------------------------------------|------|
| <b>1. General information</b> .....                                                                                                        | S2   |
| <b>2. General procedure for the preparation of internal ynones 1</b> .....                                                                 | S2   |
| <b>3. General procedure for Michael reaction</b> .....                                                                                     | S9   |
| 3.1 Screening of bases, solvents, and reaction conditions for Michael reaction between alkyne <b>1a</b> and benzyl cyanide <b>2c</b> ..... | S9   |
| 3.2 General procedure for Michael reaction between various internal ynones <b>1</b> and nitriles <b>2</b> .....                            | S10  |
| <b>4. Trial for the transformation of 2-pyrone to bicyclic 2-pyridone</b> .....                                                            | S27  |
| <b>5. General procedure for the synthesis of amidine <b>5c</b> and bicyclic 2-pyridones <b>5/7</b></b> .....                               | S29  |
| 5.1 General procedure for the synthesis of amidine <b>5c</b> .....                                                                         | S29  |
| 5.2 General procedure for the synthesis of bicyclic 2-pyridones <b>5/7</b> .....                                                           | S29  |
| <b>6. Synthesis of (±)-<i>seco</i>-antofine (<b>8</b>) and (±)-julandine (<b>9</b>)</b> .....                                              | S42  |
| <b>7. References</b> .....                                                                                                                 | S44  |
| <b>8. <sup>1</sup>H and <sup>13</sup>C NMR spectra</b> .....                                                                               | S45  |
| <b>9. HPLC spectra for compound <b>5s</b></b> .....                                                                                        | S132 |

## 1. General information

Unless otherwise noted, all commercial reagents were used without further purification. Anhydrous solvents and reagents were purified and dried according to the standard procedures. Column chromatography was carried out using silica gel. Thin layer chromatography (TLC) was carried out on glass plates precoated with 0.25 mm silica gel 60 F<sub>254</sub>. Flash chromatography column were performed on 230-400 mesh silica gel. <sup>1</sup>H NMR spectra were recorded on a 300 MHz NMR instrument. Chemical shifts ( $\delta$  values) for <sup>1</sup>H nuclear magnetic resonance (NMR) spectra were reported in parts per million (ppm) downfield from tetramethylsilane ( $\delta = 0.00$  ppm) as internal reference and coupling constants ( $J$  values) in Hz. Multiplicity was indicated using the following abbreviations: singlet (s), doublet (d), triplet (t), quartet (q), pentet (pent), multiplet (m), broad (br). <sup>13</sup>C Spectra were recorded on a 75 MHz NMR spectrometer with CDCl<sub>3</sub> ( $\delta = 77.00$  ppm) as internal reference and complete proton decoupling. Infrared (IR) spectra were obtained using Universal Attenuated Total Reflectance (UATR) technique and reported in wavenumbers (cm<sup>-1</sup>). High resolution mass spectrometry (HRMS) was performed using time-of-flight (TOF). Optical rotations were recorded on a Jasco P-1020 polarimeter. Melting points (mp) were determined and reported without correction. HPLC analysis was performed on a chiral column at 254 nm.

## 2. General procedure for the preparation of internal ynones 1

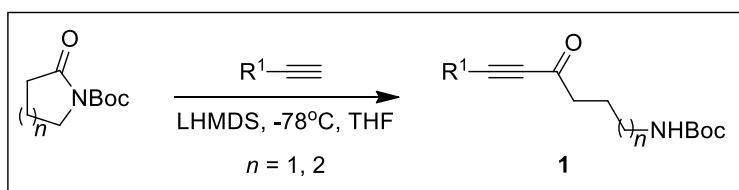

Lithium hexamethyldisilazane (LHMDS, 1 M in THF, 1.5 equiv) was added dropwise to a solution of alkynes (1.2 equiv) in THF (5 mL) at  $-78^\circ\text{C}$  and further stirred for 45 min. Then, the solution of lactam (3 mmol, 1.0 equiv) in THF (10 mL) was added dropwise and the mixture was stirred for an additional 4 h. The reaction was quenched with saturated NH<sub>4</sub>Cl solution, gradually warmed up to room temperature and extracted with EtOAc. The combined organic part was washed with water, dried over Na<sub>2</sub>SO<sub>4</sub>, and the solvent was concentrated under reduced pressure. Crude products were purified by column chromatography on silica gel using hexanes and an increasing proportion of EtOAc as eluents to afford compounds **1**.

### *tert*-Butyl 4-oxo-6-phenylhex-5-ynylcarbamate (**1a**)<sup>1)</sup>

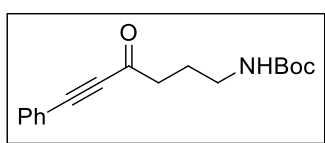

81% yield, white solid, m.p. 69.5–70.5°C

$^1\text{H}$  NMR (300 MHz,  $\text{CDCl}_3$ )  $\delta$  7.60–7.35 (m, 5H), 4.64 (br s, 1H), 3.20 (br q,  $J = 6.5$  Hz, 2H), 2.74 (t,  $J = 7.2$  Hz, 2H), 1.92 (pent,  $J = 7.0$  Hz, 2H), 1.44 (s, 9H)

$^{13}\text{C}$  NMR (75 MHz,  $\text{CDCl}_3$ )  $\delta$  187.12, 155.93, 132.96, 130.67, 128.54, 119.75, 90.96, 87.62, 79.15, 42.64, 39.71, 28.29, 24.33

IR (UATR)  $\nu_{\text{max}}$  3361, 2976, 2201, 1669, 1513, 1365, 1249, 1166, 1052, 758, 689  $\text{cm}^{-1}$

HRMS ( $\text{ESI}^+$ ) calcd for  $\text{C}_{17}\text{H}_{21}\text{N}_1\text{Na}_1\text{O}_3$  ( $\text{M}+\text{Na}$ ) $^+$  310.1414, found 310.1416.

**tert-Butyl 6-(3,4-dimethoxyphenyl)-4-oxohex-5-ynylcarbamate (1b)**

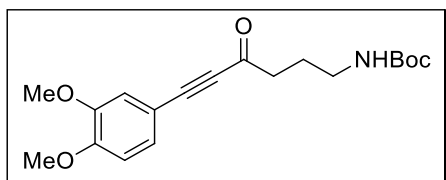

75% yield, white solid, m.p. 80.1–80.5°C

$^1\text{H}$  NMR (300 MHz,  $\text{CDCl}_3$ )  $\delta$  7.23 (dd,  $J = 8.3, 1.3$  Hz, 1H), 7.06 (d,  $J = 1.3$  Hz, 1H), 6.86 (d,  $J = 8.3$  Hz, 1H), 4.65 (br s, 1H), 3.92 (s, 3H), 3.90 (s, 3H), 3.20 (br q,  $J = 6.4$  Hz, 2H), 2.73 (t,  $J = 7.2$  Hz, 2H), 1.92 (pent,  $J = 7.0$  Hz, 2H), 1.44 (s, 9H)

$^{13}\text{C}$  NMR (75 MHz,  $\text{CDCl}_3$ )  $\delta$  186.79, 155.73, 151.30, 148.43, 127.14, 115.03, 111.23, 110.76, 91.83, 87.04, 78.67, 55.59, 55.57, 42.23, 39.46, 28.02, 24.13

IR (UATR)  $\nu_{\text{max}}$  3391, 2974, 2186, 1709, 1663, 1596, 1513, 1249, 1170, 1023, 855, 810, 763  $\text{cm}^{-1}$

HRMS ( $\text{ESI}^+$ ) calcd for  $\text{C}_{19}\text{H}_{25}\text{N}_1\text{Na}_1\text{O}_5$  ( $\text{M}+\text{Na}$ ) $^+$  370.1625, found 370.1623.

**tert-Butyl 6-(4-chlorophenyl)-4-oxohex-5-ynylcarbamate (1c)**

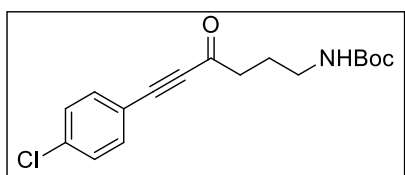

79% yield, white solid, m.p. 104.3–105°C

$^1\text{H}$  NMR (300 MHz,  $\text{CDCl}_3$ )  $\delta$  7.50 (d,  $J = 8.6$  Hz, 2H), 7.36 (d,  $J = 8.6$  Hz, 2H), 4.75 (br s, 1H), 3.19 (br q,  $J = 6.5$  Hz, 2H), 2.73 (t,  $J = 7.2$  Hz, 2H), 1.91 (pent,  $J = 7.0$  Hz, 2H), 1.44 (s, 9H)

$^{13}\text{C}$  NMR (75 MHz,  $\text{CDCl}_3$ )  $\delta$  186.85, 155.91, 137.05, 134.13, 129.00, 118.24, 89.41, 88.28, 79.17, 42.60, 39.70, 28.29, 24.30

IR (UATR)  $\nu_{\text{max}}$  3316, 2977, 2202, 1684, 1669, 1533, 1365, 1289, 1167, 1088, 822, 758  $\text{cm}^{-1}$

HRMS ( $\text{ESI}^+$ ) calcd for  $\text{C}_{17}\text{H}_{20}\text{Cl}_1\text{N}_1\text{Na}_1\text{O}_3$  ( $\text{M}+\text{Na}$ ) $^+$  344.1024, found 344.1022.

**tert-Butyl 6-(4-nitrophenyl)-4-oxohex-5-ynylcarbamate (1d)**

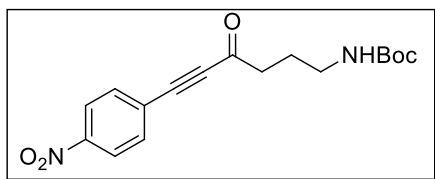

73% yield, yellow solid, m.p. 120.1–121.0°C

$^1\text{H NMR}$  (300 MHz,  $\text{CDCl}_3$ )  $\delta$  8.26 (d,  $J = 8.9$  Hz, 2H), 7.73 (d,  $J = 8.9$  Hz, 2H), 4.62 (br s, 1H), 3.20 (br q,  $J = 6.5$  Hz, 2H), 2.77 (t,  $J = 7.2$  Hz, 2H), 1.93 (pent,  $J = 7.0$  Hz, 2H), 1.44 (s, 9H)

$^{13}\text{C NMR}$  (75 MHz,  $\text{CDCl}_3$ )  $\delta$  186.48, 155.94, 148.37, 133.56, 126.45, 123.65, 90.41, 86.94, 79.21, 42.65, 39.60, 28.27, 24.17

IR (UATR)  $\nu_{\text{max}}$  3306, 2973, 2207, 1681, 1674, 1521, 1348, 1286, 1172, 1036, 857, 750, 685  $\text{cm}^{-1}$

HRMS ( $\text{ESI}^+$ ) calcd for  $\text{C}_{17}\text{H}_{20}\text{N}_2\text{Na}_1\text{O}_5$  ( $\text{M}+\text{Na}$ ) $^+$  355.1264, found 355.1264.

**tert-Butyl 4-oxo-6-(pyridin-3-yl)hex-5-ynylcarbamate (1e)**

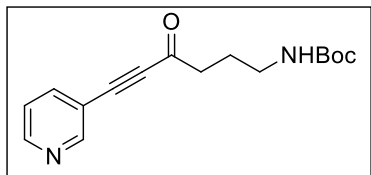

71% yield, brown solid, m.p. 79.3–80.0°C

$^1\text{H NMR}$  (300 MHz,  $\text{CDCl}_3$ )  $\delta$  8.79 (d,  $J = 1.4$  Hz, 1H), 8.66 (dd,  $J = 4.9, 1.5$  Hz, 1H), 7.86 (dt,  $J = 7.9, 1.9$  Hz, 1H), 7.34 (ddd,  $J = 7.9, 4.9, 0.7$  Hz, 1H), 4.71 (br s, 1H), 3.20 (br q,  $J = 6.5$  Hz, 2H), 2.76 (t,  $J = 7.2$  Hz, 2H), 1.92 (pent,  $J = 7.0$  Hz, 2H), 1.44 (s, 9H)

$^{13}\text{C NMR}$  (75 MHz,  $\text{CDCl}_3$ )  $\delta$  186.65, 155.95, 153.24, 150.71, 139.82, 123.20, 117.21, 90.11, 86.79, 79.28, 42.66, 39.69, 28.33, 24.27

IR (UATR)  $\nu_{\text{max}}$  3347, 2976, 2206, 1694, 1674, 1516, 1366, 1250, 1167, 808, 703  $\text{cm}^{-1}$

HRMS ( $\text{ESI}^+$ ) calcd for  $\text{C}_{16}\text{H}_{20}\text{N}_2\text{Na}_1\text{O}_3$  ( $\text{M}+\text{Na}$ ) $^+$  311.1366, found 311.1375.

**tert-Butyl 4-oxo-6-(thiophen-2-yl)hex-5-ynylcarbamate (1f)**

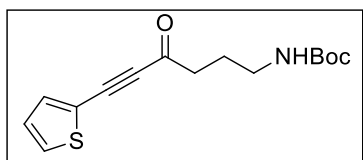

76% yield, white solid, m.p. 77.1–77.4°C

$^1\text{H NMR}$  (300 MHz,  $\text{CDCl}_3$ )  $\delta$  7.75 (dd,  $J = 3.0, 1.0$  Hz, 1H), 7.34 (dd,  $J = 5.0, 3.0$  Hz, 1H), 7.22 (dd,  $J = 5.0, 1.0$  Hz, 1H), 4.66 (br s, 1H), 3.19 (br q,  $J = 6.5$  Hz, 2H), 2.72 (t,  $J = 7.2$  Hz, 2H), 1.91 (pent,  $J = 7.0$  Hz, 2H), 1.44 (s, 9H)

$^{13}\text{C}$  NMR (75 MHz,  $\text{CDCl}_3$ )  $\delta$  186.99, 155.87, 133.81, 130.09, 126.11, 119.00, 87.85, 86.27, 79.06, 42.47, 39.68, 28.27, 24.31

IR (UATR)  $\nu_{\text{max}}$  3372, 2977, 2195, 1699, 1667, 1516, 1365, 1250, 1169, 787  $\text{cm}^{-1}$

HRMS ( $\text{ESI}^+$ ) calcd for  $\text{C}_{15}\text{H}_{19}\text{N}_1\text{Na}_1\text{O}_3\text{S}_1$  ( $\text{M}+\text{Na}$ ) $^+$  316.0978, found 316.0989.

**tert-Butyl 4-oxodec-5-ynylcarbamate (1g)**

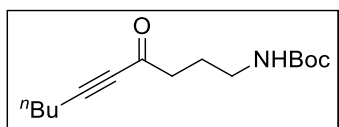

71% yield, colorless oil

$^1\text{H}$  NMR (300 MHz,  $\text{CDCl}_3$ )  $\delta$  4.63 (br s, 1H), 3.14 (br q,  $J = 6.2$  Hz, 2H), 2.59 (t,  $J = 7.2$  Hz, 2H), 2.37 (t,  $J = 7.0$  Hz, 2H), 1.83 (pent,  $J = 7.0$  Hz, 2H), 1.55 (sext,  $J = 7.2$  Hz, 2H), 1.50–1.36 (m, 2H), 1.44 (s, 9H), 0.93 (t,  $J = 7.2$  Hz, 3H)

$^{13}\text{C}$  NMR (75 MHz,  $\text{CDCl}_3$ )  $\delta$  187.28, 155.82, 94.55, 80.55, 78.87, 42.53, 39.54, 29.46, 28.16, 24.14, 21.72, 18.39, 13.26

IR (UATR)  $\nu_{\text{max}}$  3368, 2934, 2211, 1702, 1677, 1509, 1367, 1250, 1166  $\text{cm}^{-1}$

HRMS ( $\text{ESI}^+$ ) calcd for  $\text{C}_{15}\text{H}_{25}\text{N}_1\text{Na}_1\text{O}_3$  ( $\text{M}+\text{Na}$ ) $^+$  290.1727, found 290.1719.

**tert-Butyl 4-oxo-6-{4-(*N*-tert-butoxycarbonyl)aminophenyl}hex-5-ynylcarbamate (1h)**

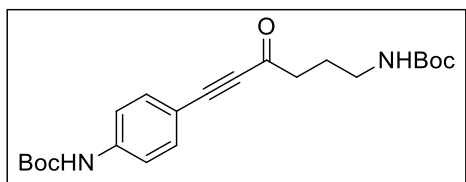

74% yield, white solid, m.p. 139.3–140.0°C

$^1\text{H}$  NMR (300 MHz,  $\text{CDCl}_3$ )  $\delta$  7.51 (d,  $J = 8.8$  Hz, 2H), 7.40 (d,  $J = 8.8$  Hz, 2H), 6.61 (br s, 1H), 4.61 (br s, 1H), 3.19 (br q,  $J = 6.7$  Hz, 2H), 2.71 (t,  $J = 7.2$  Hz, 2H), 1.91 (pent,  $J = 7.0$  Hz, 2H), 1.53 (s, 9H), 1.44 (s, 9H)

$^{13}\text{C}$  NMR (75 MHz,  $\text{CDCl}_3$ )  $\delta$  187.16, 155.98, 152.28, 141.22, 134.18, 117.94, 113.11, 92.10, 87.57, 80.93, 79.11, 42.47, 39.68, 28.26, 28.12, 24.34,

IR (UATR)  $\nu_{\text{max}}$  3336, 2978, 2194, 1692, 1520, 1587, 1233, 1155, 1050, 840, 774  $\text{cm}^{-1}$

HRMS ( $\text{ESI}^+$ ) calcd for  $\text{C}_{22}\text{H}_{30}\text{N}_2\text{Na}_1\text{O}_5$  ( $\text{M}+\text{Na}$ ) $^+$  425.2047, found 425.2060.

**(*R*)-Ethyl 2-(tert-butoxycarbonylamino)-5-oxo-7-phenylhept-6-ynoate (1i)**

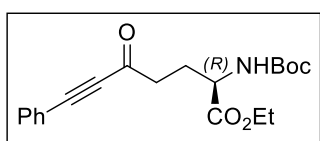

81% yield, yellow solid, m.p. 45.0–46.0°C,  $[\alpha]_{28}^{\text{D}} +10.8$  ( $c$  1.1, MeOH)

$^1\text{H}$  NMR (300 MHz,  $\text{CDCl}_3$ )  $\delta$  7.60–7.55 (m, 2H), 7.50–7.35 (m, 3H), 5.19 (d,  $J = 7.7$  Hz, 1H), 4.38–4.30 (br m, 1H), 4.21 (q,  $J = 7.1$  Hz, 2H), 2.91–2.70 (m, 2H), 2.35–2.22 (m, 1H), 2.14–1.98 (m, 1H), 1.45 (s, 9H), 1.29 (t,  $J = 7.1$  Hz, 3H)

$^{13}\text{C}$  NMR (75 MHz,  $\text{CDCl}_3$ )  $\delta$  186.14, 172.04, 155.32, 132.99, 130.74, 128.56, 119.70, 91.24, 87.48, 79.93, 61.52, 52.78, 41.34, 28.20, 26.70, 14.07

IR (UATR)  $\nu_{\text{max}}$  3365, 2979, 2202, 1742, 1713, 1671, 1490, 1368, 1252, 1160, 1027, 759, 690  $\text{cm}^{-1}$

HRMS ( $\text{ESI}^+$ ) calcd for  $\text{C}_{20}\text{H}_{25}\text{N}_1\text{Na}_1\text{O}_5$  ( $\text{M}+\text{Na}$ ) $^+$  382.1625, found 382.1636.

**tert-Butyl 5-oxo-7-phenylhept-6-ynylcarbamate (1j)**<sup>1)</sup>

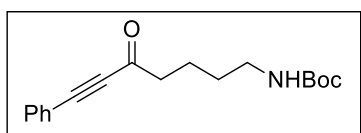

78% yield, white solid, m.p. 57.0–57.9°C

$^1\text{H}$  NMR (300 MHz,  $\text{CDCl}_3$ )  $\delta$  7.60–7.32 (m, 5H), 4.78 (br s, 1H), 3.15 (br q,  $J = 6.4$  Hz, 2H), 2.70 (t,  $J = 7.2$  Hz, 2H), 1.82–1.70 (m, 2H), 1.62–1.50 (m, 2H), 1.44 (s, 9H)

$^{13}\text{C}$  NMR (75 MHz,  $\text{CDCl}_3$ )  $\delta$  187.38, 155.85, 132.84, 130.55, 128.45, 119.69, 90.62, 87.56, 78.82, 44.76, 39.94, 29.16, 28.22, 20.97

IR (UATR)  $\nu_{\text{max}}$  3362, 2933, 2202, 1694, 1669, 1510, 1366, 1248, 1169, 1066, 758, 690  $\text{cm}^{-1}$

HRMS ( $\text{ESI}^+$ ) calcd for  $\text{C}_{18}\text{H}_{23}\text{N}_1\text{Na}_1\text{O}_3$  ( $\text{M}+\text{Na}$ ) $^+$  324.1570, found 324.1586.

**tert-Butyl 7-(3,4-dimethoxyphenyl)-5-oxohept-6-ynylcarbamate (1k)**

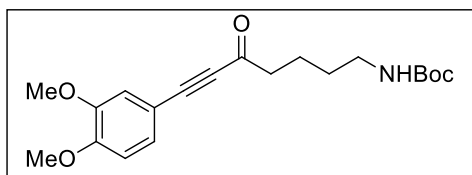

72% yield, white solid, m.p. 70.3–71.0°C

$^1\text{H}$  NMR (300 MHz,  $\text{CDCl}_3$ )  $\delta$  7.21 (dd,  $J = 8.4, 1.7$  Hz, 1H), 7.05 (d,  $J = 1.7$  Hz, 1H), 6.86 (d,  $J = 8.4$  Hz, 1H), 5.03 (br s, 1H), 3.91 (s, 3H), 3.88 (s, 3H), 3.16 (br q,  $J = 6.3$  Hz, 2H), 2.70 (t,  $J = 7.2$  Hz, 2H), 1.83–1.70 (m, 2H), 1.63–1.52 (m, 2H), 1.44 (s, 9H)

$^{13}\text{C}$  NMR (75 MHz,  $\text{CDCl}_3$ )  $\delta$  187.51, 155.95, 151.63, 148.81, 127.45, 115.40, 111.68, 111.04, 91.97, 87.42, 79.11, 55.98, 55.95, 44.77, 40.13, 29.35, 28.37, 21.18

IR (UATR)  $\nu_{\text{max}}$  3393, 2936, 2186, 1702, 1665, 1514, 1250, 1170, 1023, 856, 763  $\text{cm}^{-1}$

HRMS ( $\text{ESI}^+$ ) calcd for  $\text{C}_{20}\text{H}_{27}\text{N}_1\text{Na}_1\text{O}_5$  ( $\text{M}+\text{Na}$ ) $^+$  384.1781, found 384.1796.

**tert-Butyl 7-(4-chlorophenyl)-5-oxohept-6-ynylcarbamate (1l)**

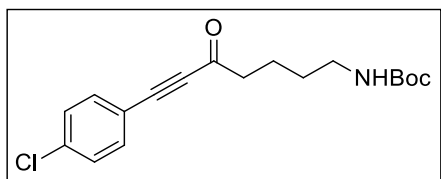

71% yield, white solid, m.p. 81.1–82.0°C

$^1\text{H}$  NMR (300 MHz,  $\text{CDCl}_3$ )  $\delta$  7.50 (d,  $J = 8.7$  Hz, 2H), 7.36 (d,  $J = 8.7$  Hz, 2H), 4.85 (br s, 1H), 3.16 (br q,  $J = 6.4$  Hz, 2H), 2.70 (t,  $J = 7.2$  Hz, 2H), 1.82–1.70 (m, 2H), 1.62–1.50 (m, 2H), 1.44 (s, 9H)

$^{13}\text{C}$  NMR (75 MHz,  $\text{CDCl}_3$ )  $\delta$  186.85, 155.68, 136.59, 133.81, 128.65, 117.95, 88.76, 88.01, 78.42, 44.49, 39.66, 28.92, 28.00, 20.68,

IR (UATR)  $\nu_{\text{max}}$  3362, 2933, 2202, 1694, 1670, 1489, 1366, 1248, 1167, 1090, 829, 765  $\text{cm}^{-1}$

HRMS ( $\text{ESI}^+$ ) calcd for  $\text{C}_{18}\text{H}_{22}\text{Cl}_1\text{N}_1\text{Na}_1\text{O}_3$  ( $\text{M}+\text{Na}$ ) $^+$  358.1180, found 358.1186.

**tert-Butyl 7-(4-nitrophenyl)-5-oxohept-6-ynylcarbamate (1m)**

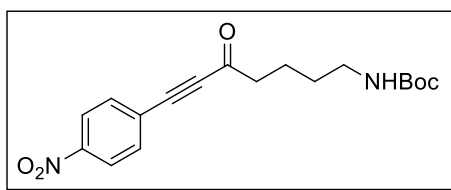

69% yield, white solid, m.p. 105.3–106.0°C

$^1\text{H}$  NMR (300 MHz,  $\text{CDCl}_3$ )  $\delta$  8.26 (d,  $J = 8.9$  Hz, 2H), 7.74 (d,  $J = 8.7$  Hz, 2H), 4.68 (br s, 1H), 3.17 (br q,  $J = 6.5$  Hz, 2H), 2.75 (t,  $J = 7.2$  Hz, 2H), 1.84–1.71 (m, 2H), 1.63–1.51 (m, 2H), 1.44 (s, 9H)

$^{13}\text{C}$  NMR (75 MHz,  $\text{CDCl}_3$ )  $\delta$  186.80, 155.92, 148.39, 133.56, 126.51, 123.67, 90.51, 86.76, 79.08, 44.87, 39.97, 29.26, 28.30, 20.81

IR (UATR)  $\nu_{\text{max}}$  3364, 2936, 2208, 1694, 1677, 1595, 1522, 1345, 1250, 1168, 858, 750, 687  $\text{cm}^{-1}$

HRMS ( $\text{ESI}^+$ ) calcd for  $\text{C}_{18}\text{H}_{22}\text{N}_2\text{Na}_1\text{O}_5$  ( $\text{M}+\text{Na}$ ) $^+$  369.1421, found 369.1420.

**tert-Butyl 7-(pyridin-3-yl)-5-oxohept-6-ynylcarbamate (1n)**

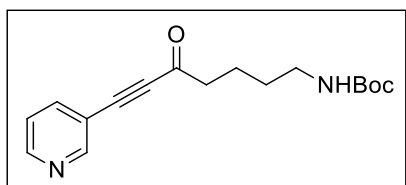

74% yield, yellow solid, m.p. 69.3–70.0°C

$^1\text{H}$  NMR (300 MHz,  $\text{CDCl}_3$ )  $\delta$  8.80 (dd,  $J = 1.9, 0.8$  Hz, 1H), 8.67 (dd,  $J = 4.9, 1.7$  Hz, 1H), 7.86 (dt,  $J = 7.9, 1.9$  Hz, 1H), 7.34 (ddd,  $J = 7.9, 4.9, 0.8$  Hz, 1H), 4.58 (br s, 1H), 3.16 (br q,  $J = 6.5$  Hz, 2H), 2.73 (t,  $J = 7.2$  Hz, 2H), 1.83–1.71 (m, 2H), 1.62–1.51 (m, 2H), 1.44 (s, 9H)

$^{13}\text{C}$  NMR (75 MHz,  $\text{CDCl}_3$ )  $\delta$  186.67, 155.75, 152.75, 150.28, 139.52, 122.96, 116.89, 89.82, 86.17, 78.51, 44.54, 39.66, 28.92, 28.01, 20.62

IR (UATR)  $\nu_{\text{max}}$  3348, 2933, 2206, 1702, 1674, 1516, 1366, 1249, 1169, 808, 704  $\text{cm}^{-1}$

HRMS ( $\text{ESI}^+$ ) calcd for  $\text{C}_{17}\text{H}_{22}\text{N}_2\text{Na}_1\text{O}_3$  ( $\text{M}+\text{Na}$ ) $^+$  325.1523, found 325.1537.

#### **tert-Butyl 7-(thiophen-2-yl)-5-oxohept-6-ynylcarbamate (1o)**

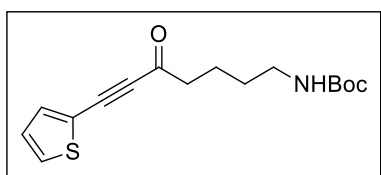

71% yield, white solid, m.p. 65.4–65.7°C

$^1\text{H}$  NMR (300 MHz,  $\text{CDCl}_3$ )  $\delta$  7.75 (dd,  $J = 3.0, 1.1$  Hz, 1H), 7.34 (dd,  $J = 5.0, 3.0$  Hz, 1H), 7.22 (dd,  $J = 5.0, 1.1$  Hz, 1H), 4.58 (br s, 1H), 3.15 (br q,  $J = 6.5$  Hz, 2H), 2.69 (t,  $J = 7.2$  Hz, 2H), 1.81–1.70 (m, 2H), 1.61–1.49 (m, 2H), 1.44 (s, 9H)

$^{13}\text{C}$  NMR (75 MHz,  $\text{CDCl}_3$ )  $\delta$  187.41, 155.88, 133.78, 130.12, 126.11, 119.05, 87.89, 86.10, 78.96, 44.69, 40.02, 29.24, 28.29, 21.04

IR (UATR)  $\nu_{\text{max}}$  3363, 2933, 2190, 1698, 1667, 1510, 1365, 1249, 1169, 1063, 787  $\text{cm}^{-1}$

HRMS ( $\text{ESI}^+$ ) calcd for  $\text{C}_{16}\text{H}_{21}\text{N}_1\text{Na}_1\text{O}_3\text{S}_1$  ( $\text{M}+\text{Na}$ ) $^+$  330.1134, found 330.1137.

#### **tert-Butyl 5-oxoundec-6-ynylcarbamate (1p)**

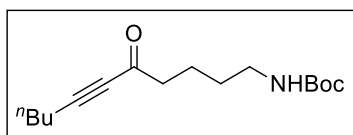

72% yield, colorless oil

$^1\text{H}$  NMR (300 MHz,  $\text{CDCl}_3$ )  $\delta$  4.82 (br s, 1H), 3.12 (br q,  $J = 6.2$  Hz, 2H), 2.57 (t,  $J = 7.2$  Hz, 2H), 2.37 (t,  $J = 6.8$  Hz, 2H), 1.75–1.35 (m, 8H), 1.44 (s, 9H), 0.93 (t,  $J = 7.2$  Hz, 3H)

$^{13}\text{C}$  NMR (75 MHz,  $\text{CDCl}_3$ )  $\delta$  187.61, 155.79, 94.26, 80.56, 78.70, 44.71, 39.87, 29.45, 29.06, 28.15, 21.68, 20.87, 18.34, 13.22

IR (UATR)  $\nu_{\text{max}}$  3361, 2934, 2212, 1694, 1673, 1515, 1366, 1249, 1166  $\text{cm}^{-1}$

HRMS ( $\text{ESI}^+$ ) calcd for  $\text{C}_{16}\text{H}_{27}\text{N}_1\text{Na}_1\text{O}_3$  ( $\text{M}+\text{Na}$ ) $^+$  304.1883, found 304.1895.



**tert-Butyl 7-{4-(N-tert-butoxycarbonyl)aminophenyl}-5-oxohept-6-ynylcarbamate (1q)**

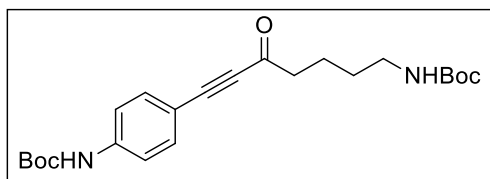

75% yield, white solid, m.p. 120.7–121.4°C

$^1\text{H}$  NMR (300 MHz,  $\text{CDCl}_3$ )  $\delta$  7.50 (d,  $J = 8.8$  Hz, 2H), 7.40 (d,  $J = 8.8$  Hz, 2H), 6.75 (br s, 1H), 4.59 (br s, 1H), 3.15 (br q,  $J = 6.4$  Hz, 2H), 2.68 (t,  $J = 7.2$  Hz, 2H), 1.82–1.69 (m, 2H), 1.61–1.49 (m, 2H), 1.52 (s, 9H), 1.44 (s, 9H)

$^{13}\text{C}$  NMR (75 MHz,  $\text{CDCl}_3$ )  $\delta$  187.46, 155.92, 152.30, 141.32, 133.97, 117.86, 112.82, 91.92, 87.45, 80.56, 78.75, 44.54, 39.85, 29.03, 28.14, 27.97, 20.95

IR (UATR)  $\nu_{\text{max}}$  3334, 2977, 2192, 1689, 1586, 1518, 1231, 1152, 1050, 839, 773  $\text{cm}^{-1}$

HRMS ( $\text{ESI}^+$ ) calcd for  $\text{C}_{23}\text{H}_{32}\text{N}_2\text{Na}_1\text{O}_5$  ( $\text{M}+\text{Na}$ ) $^+$  439.2203, found 439.2186.

**3. General procedure for Michael reaction**

**3.1 Screening of bases, solvents, and reaction conditions for Michael reaction between alkynone **1a** and benzyl cyanide **2c****

A solution of alkynone **1a** (0.35 mmol) in solvent (1.0 mL) were added to a mixture of benzyl cyanide **2c** (1.1 equiv.) and base (1.1 equiv.) in solvent (1.0 mL) at room temperature. The reaction was stirred at room temperature for 1-2 h. Then, the mixture was cooled down under ice-bath and neutralized with 1 N HCl. The products were extracted with EtOAc. The combined organic layers were washed with water, successively, dried over  $\text{Na}_2\text{SO}_4$ , and the solvent was concentrated under reduced pressure. The crude products were purified by column chromatography on silica gel using hexanes and increasing proportion of EtOAc as eluents to afford compound **3c**.

**tert-Butyl 7-cyano-4-oxo-6,7-diphenylhept-6-enylcarbamate (3c)**

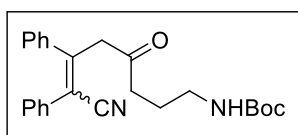

81% yield, yellow oil

$^1\text{H}$  NMR (300 MHz,  $\text{CDCl}_3$ )  $\delta$  (isomeric ratio 45:55) 7.52–7.36 (m, 10H), 7.23–7.02 (m, 10H), 4.79 (br s, 1H), 4.67 (br s, 1H), 4.03 (s, 2H), 3.67 (s, 2H), 3.06 (br q,  $J = 6.4$  Hz, 2H), 2.94 (br q,  $J = 6.4$  Hz, 2H), 2.56 (t,  $J = 7.1$  Hz, 2H), 2.26 (t,  $J = 7.1$  Hz, 2H), 1.74 (pent,  $J = 7.0$  Hz, 2H), 1.58 (pent,  $J = 7.0$  Hz, 2H), 1.42 (s, 9H), 1.40 (s, 9H)

$^{13}\text{C}$  NMR (75 MHz,  $\text{CDCl}_3$ )  $\delta$  (isomeric ratio 45:55) 205.41, 204.40, 155.89, 155.83, 152.59, 151.21, 138.79, 137.71, 133.82, 132.93, 129.67, 129.27, 129.19, 129.02, 128.86, 128.61, 128.52,

128.36, 128.35, 128.24, 128.16, 128.09, 127.59, 118.50, 118.42, 115.33, 115.11, 78.87, 51.99, 48.38, 40.14, 39.91, 39.38, 39.30, 28.17, 28.15, 23.71, 23.59

IR (UATR)  $\nu_{\max}$  3384, 2976, 2214, 1708, 1510, 1366, 1249, 1167, 763, 698  $\text{cm}^{-1}$

HRMS (ESI<sup>+</sup>) calcd for  $\text{C}_{25}\text{H}_{28}\text{N}_2\text{Na}_1\text{O}_3$  (M+Na)<sup>+</sup> 427.1992, found 427.1978.

**Table S1.** Screening of bases, solvents, and reaction conditions

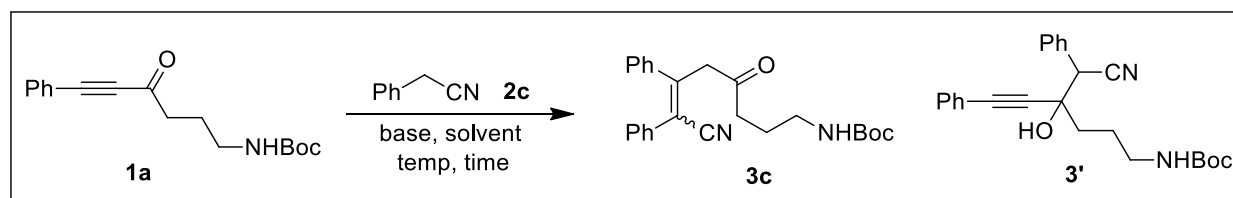

| Entry | Base                           | Solvent     | Temp (°C) | Time (h) | Conversion ratio of <b>1a</b> : <b>3c</b> | Isomer ratio of <b>3c</b> | Yield of <b>3c</b> (%) |
|-------|--------------------------------|-------------|-----------|----------|-------------------------------------------|---------------------------|------------------------|
| 1     | LHMDS                          | THF         | -78       | 1        | compound <b>3'</b>                        | -                         | as <b>3'</b> : 89      |
| 2     | NaH                            | DMF         | RT        | 2        | 4:96                                      | 10 : 13                   | 89                     |
| 3     | K <sub>2</sub> CO <sub>3</sub> | MeCN        | RT        | 2        | 100:0                                     | -                         | -                      |
| 4     | NaOMe                          | MeCN        | RT        | 2        | 100:0                                     | -                         | -                      |
| 5     | LiO <sup>t</sup> Bu            | MeCN        | RT        | 2        | 100:0                                     | -                         | -                      |
| 6     | NaO <sup>t</sup> Bu            | MeCN        | RT        | 2        | 81:19                                     | 10 : 13                   | -                      |
| 7     | KO <sup>t</sup> Bu             | MeCN        | RT        | 2        | 51:49                                     | 10 : 15                   | -                      |
| 8     | KO <sup>t</sup> Bu             | THF         | RT        | 2        | 29:71                                     | 7 : 5                     | 63                     |
| 9     | KO <sup>t</sup> Bu             | DME         | RT        | 2        | 23:77                                     | 6 : 5                     | 69                     |
| 10    | KO <sup>t</sup> Bu             | DMF         | RT        | 2        | 0:100                                     | 10 : 13                   | 91                     |
| 11    | KO <sup>t</sup> Bu             | NMP         | RT        | 2        | 18:82                                     | 5 : 6                     | 75                     |
| 12    | KO <sup>t</sup> Bu             | 1,4-dioxane | RT        | 2        | 23:77                                     | 10 : 15                   | 66                     |
| 13    | LiO <sup>t</sup> Bu            | DMF         | RT        | 2        | 20:80                                     | 10 : 13                   | 75                     |
| 14    | NaO <sup>t</sup> Bu            | DMF         | RT        | 2        | 29:71                                     | 5 : 7                     | 65                     |
| 15    | DBU                            | DMF         | RT        | 2        | 65:35                                     | 1 : 1                     | -                      |

### 3.2 General procedure for Michael reaction between various internal ynones **1** and nitriles **2**

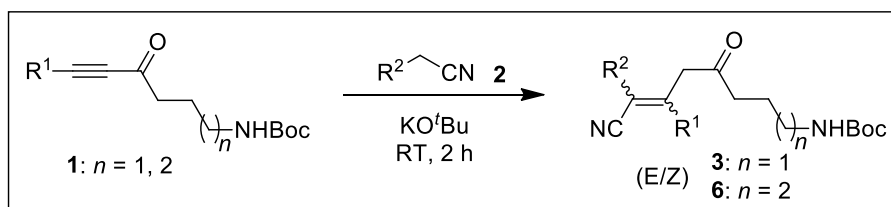

A solution of alkyne carbamate **1** (0.35 mmol) in DMF (1 mL) were added to a mixture of nitrile **2** (1.1 equiv) and KO<sup>t</sup>Bu (1.1 equiv) in DMF (1 mL) at room temperature. The reaction was stirred at room temperature for 2 h. Then, the mixture was cooled down under ice-bath and neutralized with 1

N HCl. The products were extracted with EtOAc. The combined organic layers were washed with water, successively, dried over Na<sub>2</sub>SO<sub>4</sub>, and the solvent was concentrate under reduced pressure. Crude products were purified by column chromatography on silica gel using hexanes and an increasing proportion of EtOAc as eluents to afford compound **3** or **6**.

**Note:** (1) For the synthesis of nitro compounds (**3p**, **3q**, **6p**, and **6q**), K<sub>2</sub>CO<sub>3</sub> was used as base, instead of KO<sup>t</sup>Bu, and the reaction was stirred at room temperature for 4 h. (2) Due to stability, compound **3s** was used in the next reaction without purification.

**tert-Butyl 7-(3,4-dimethoxyphenyl)-7-cyano-4-oxo-6-phenylhept-6-enylcarbamate (3d)**

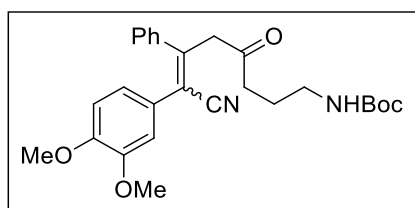

75% yield, yellow oil

<sup>1</sup>H NMR (300 MHz, CDCl<sub>3</sub>) δ (isomeric ratio 48:52) 7.51–7.39 (m, 5H), 7.29–7.22 (m, 3H), 7.10 (dd, *J* = 8.7, 2.0 Hz, 2H), 7.00–6.95 (m, 2H), 6.90 (d, *J* = 8.7 Hz, 1H), 6.87 (dd, *J* = 8.4, 2.0 Hz, 1H), 6.71 (d, *J* = 8.4 Hz, 1H), 6.47 (d, *J* = 2.0 Hz, 1H), 4.62 (br s, 1H), 4.50 (br s, 1H), 4.02 (s, 2H), 3.91 (s, 3H), 3.88 (s, 3H), 3.83 (s, 3H), 3.72 (s, 2H), 3.48 (s, 3H), 3.09 (br q, *J* = 6.4 Hz, 2H), 2.98 (br q, *J* = 6.4 Hz, 2H), 2.58 (t, *J* = 7.1 Hz, 2H), 2.31 (t, *J* = 7.1 Hz, 2H), 1.77 (pent, *J* = 7.0 Hz, 2H), 1.61 (pent, *J* = 7.0 Hz, 2H), 1.43 (s, 9H), 1.41 (s, 9H)

<sup>13</sup>C NMR (75 MHz, CDCl<sub>3</sub>) δ (isomeric ratio 48:52) 205.83, 204.69, 155.97, 155.89, 151.78, 149.69, 149.50, 149.08, 148.22, 138.99, 138.47, 129.41, 128.73, 128.68, 128.59, 128.29, 127.75, 126.43, 125.34, 122.26, 121.23, 118.64, 115.40, 115.34, 112.32, 111.60, 111.21, 110.62, 79.17, 55.94, 55.89, 55.71, 55.36, 52.26, 48.76, 40.52, 40.07, 39.58, 39.52, 28.31, 28.28, 23.89, 23.83

IR (UATR)  $\nu_{\max}$  3391, 2975, 2213, 1709, 1600, 1515, 1366, 1262, 1171, 1025, 765, 701 cm<sup>-1</sup>

HRMS (ESI<sup>+</sup>) calcd for C<sub>27</sub>H<sub>32</sub>N<sub>2</sub>Na<sub>1</sub>O<sub>5</sub> (M+Na)<sup>+</sup> 487.2203, found 487.2196.

**tert-Butyl 7-(4-chlorophenyl)-7-cyano-4-oxo-6-phenylhept-6-enylcarbamate (3e)**

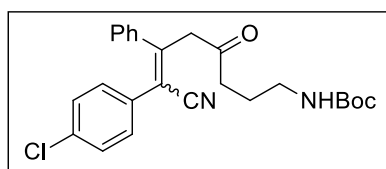

87% yield, yellow oil

<sup>1</sup>H NMR (300 MHz, CDCl<sub>3</sub>) δ (isomeric ratio 50:50) 7.50–7.33 (m, 9H), 7.26–7.18 (m, 3H), 7.14 (d, *J* = 8.6 Hz, 2H), 7.06 (d, *J* = 8.6 Hz, 2H), 7.07–7.02 (m, 2H), 4.76 (br s, 1H), 4.65 (br s, 1H), 4.03 (s, 2H), 3.67 (s, 2H), 3.08 (br q, *J* = 6.2 Hz, 2H), 2.97 (br q, *J* = 6.2 Hz, 2H), 2.56 (t, *J* = 7.1

Hz, 2H), 2.30 (t,  $J = 7.1$  Hz, 2H), 1.75 (pent,  $J = 7.0$  Hz, 2H), 1.60 (pent,  $J = 7.0$  Hz, 2H), 1.42 (s, 19H), 1.41 (s, 19H)

$^{13}\text{C}$  NMR (75 MHz,  $\text{CDCl}_3$ )  $\delta$  (isomeric ratio 50:50) 205.28, 204.24, 155.94, 155.89, 153.17, 151.99, 138.60, 137.50, 135.19, 134.27, 132.25, 131.48, 130.56, 129.88, 129.49, 129.15, 128.88, 128.63, 128.58, 128.47, 128.15, 127.57, 118.15, 118.11, 114.26, 114.17, 78.98, 52.05, 48.41, 40.27, 40.03, 39.40, 39.27, 28.20, 28.18, 23.78, 23.69

IR (UATR)  $\nu_{\text{max}}$  3378, 2977, 2214, 1707, 1512, 1366, 1250, 1168, 1093, 833, 767, 700  $\text{cm}^{-1}$

HRMS ( $\text{ESI}^+$ ) calcd for  $\text{C}_{25}\text{H}_{27}\text{Cl}_1\text{N}_2\text{Na}_1\text{O}_3$  ( $\text{M}+\text{Na}$ ) $^+$  461.1602, found 461.1595.

**tert-Butyl 7-cyano-7-(4-(*N*-tert-butoxycarbonyl)aminophenyl)-4-oxo-6-phenylhept-6-enyl carbamate (3f)**

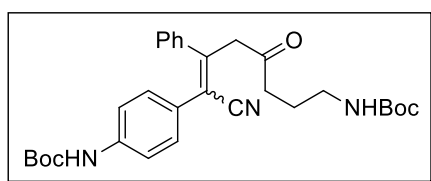

81% yield, yellow oil

$^1\text{H}$  NMR (300 MHz,  $\text{CDCl}_3$ )  $\delta$  (isomeric ratio 43:57) 7.50–7.38 (m, 7H), 7.31 (d,  $J = 8.8$  Hz, 2H), 7.24–7.16 (m, 5H), 7.09–7.04 (m, 2H), 7.04 (d,  $J = 8.8$  Hz, 2H), 6.84 (br s, 1H), 6.66 (br s, 1H), 4.63 (br s, 1H), 4.55 (br s), 4.01 (s, 2H), 3.68 (s, 2H), 3.08 (br q,  $J = 6.4$  Hz, 2H), 2.96 (br q,  $J = 6.6$  Hz, 2H), 2.56 (t,  $J = 7.1$  Hz, 2H), 2.28 (t,  $J = 7.1$  Hz, 2H), 1.76 (pent,  $J = 6.9$  Hz, 2H), 1.60 (pent,  $J = 7.0$  Hz, 2H), 1.52 (s, 9H), 1.48 (s, 9H), 1.43 (s, 9H), 1.41 (s, 9H)

$^{13}\text{C}$  NMR (75 MHz,  $\text{CDCl}_3$ )  $\delta$  (isomeric ratio 43:57) 205.61, 204.68, 155.99, 155.93, 152.53, 152.36, 152.11, 150.09, 139.36, 139.04, 138.60, 138.05, 130.11, 129.39, 129.31, 128.72, 128.70, 128.62, 128.33, 128.30, 127.74, 127.31, 118.67, 118.60, 117.83, 115.11, 115.02, 80.87, 80.74, 79.15, 52.24, 48.61, 40.37, 40.05, 39.55, 28.33, 28.32, 28.24, 28.21, 23.88, 23.81

IR (UATR)  $\nu_{\text{max}}$  3335, 2978, 2213, 1701, 1522, 1234, 1156, 1054, 841, 772, 699  $\text{cm}^{-1}$

HRMS ( $\text{ESI}^+$ ) calcd for  $\text{C}_{30}\text{H}_{37}\text{N}_3\text{Na}_1\text{O}_5$  ( $\text{M}+\text{Na}$ ) $^+$  542.2625, found 542.2606.

**tert-Butyl 7-cyano-7-(pyridin-3-yl)-4-oxo-6-phenylhept-6-enylcarbamate (3g)**

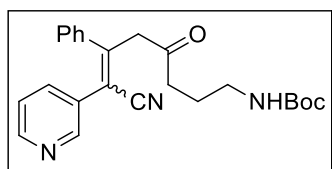

73% yield, yellow oil

$^1\text{H}$  NMR (300 MHz,  $\text{CDCl}_3$ )  $\delta$  (isomeric ratio 60:40) 8.67 (d,  $J = 2.0$  Hz, 1H), 8.65 (dd,  $J = 4.8, 1.5$  Hz, 1H), 8.42 (dd,  $J = 4.8, 1.5$  Hz, 1H), 8.34 (d,  $J = 1.7$  Hz, 1H), 7.79 (dt,  $J = 8.0, 2.0$  Hz, 1H), 7.52–7.42 (m, 6H), 7.39 (dd,  $J = 8.0, 4.9$  Hz, 1H), 7.28–7.19 (m, 3H), 7.15 (dd,  $J = 8.0, 4.9$  Hz,

1H), 7.08–7.01 (m, 2H), 4.82 (br s, 1H), 4.74 (br s, 1H), 4.08 (s, 2H), 3.69 (s, 2H), 3.09 (br q,  $J = 6.4$  Hz, 2H), 2.97 (br q,  $J = 6.4$  Hz, 2H), 2.59 (t,  $J = 7.1$  Hz, 2H), 2.32 (t,  $J = 7.0$  Hz, 2H), 1.77 (pent,  $J = 7.0$  Hz, 2H), 1.61 (pent,  $J = 6.8$  Hz, 2H), 1.43 (s, 9H), 1.40 (s, 9H)

$^{13}\text{C}$  NMR (75 MHz,  $\text{CDCl}_3$ )  $\delta$  (isomeric ratio 60:40) 204.93, 203.95, 155.94, 154.57, 153.77, 151.12, 149.92, 149.05, 149.03, 138.41, 137.13, 136.45, 136.20, 130.10, 129.71, 129.38, 129.16, 128.73, 128.72, 128.14, 127.53, 123.65, 122.96, 117.84, 117.75, 112.19, 112.05, 78.97, 52.05, 48.40, 40.35, 40.13, 39.41, 39.22, 28.22, 28.19, 23.83, 23.73

IR (UATR)  $\nu_{\text{max}}$  3336, 2977, 2156, 1702, 1626, 1525, 1366, 1248, 1168, 767, 702  $\text{cm}^{-1}$

HRMS ( $\text{ESI}^+$ ) calcd for  $\text{C}_{24}\text{H}_{27}\text{N}_3\text{Na}_1\text{O}_3$  ( $\text{M}+\text{Na}$ ) $^+$  428.1945, found 428.1945.

### **tert-Butyl 7-cyano-7-(thiophen-2-yl)-4-oxo-6-phenylhept-6-enylcarbamate (3h)**

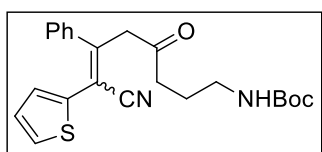

70% yield, yellow oil

$^1\text{H}$  NMR (300 MHz,  $\text{CDCl}_3$ )  $\delta$  (isomeric ratio 55:45) 7.49–7.36 (m, 9H), 7.29 (dd,  $J = 3.6, 1.2$  Hz, 1H), 7.23–7.18 (m, 3H), 7.11 (dd,  $J = 5.1, 1.2$  Hz, 1H), 7.08 (dd,  $J = 5.1, 3.7$  Hz, 1H), 6.88 (dd,  $J = 5.1, 3.7$  Hz, 1H), 4.63 (br s, 1H), 4.56 (br s, 1H), 3.97 (s, 2H), 3.93 (s, 2H), 3.08 (br q,  $J = 6.6$  Hz, 2H), 3.03 (br q,  $J = 6.6$  Hz, 2H), 2.54 (t,  $J = 7.1$  Hz, 2H), 2.43 (t,  $J = 7.1$  Hz, 2H), 1.75 (pent,  $J = 7.0$  Hz, 2H), 1.68 (pent,  $J = 7.0$  Hz, 2H), 1.42 (s, 18H)

$^{13}\text{C}$  NMR (75 MHz,  $\text{CDCl}_3$ )  $\delta$  (isomeric ratio 55:45) 204.56, 204.18, 155.82, 151.92, 148.21, 139.22, 137.71, 135.22, 134.87, 129.71, 129.42, 129.34, 129.14, 129.06, 128.52, 128.00, 127.75, 127.60, 127.33, 126.05, 117.67, 117.09, 110.70, 109.03, 78.84, 52.58, 49.37, 40.04, 39.98, 39.39, 28.16, 23.70, 23.64

IR (UATR)  $\nu_{\text{max}}$  3385, 2976, 2219, 1706, 1513, 1366, 1249, 1168, 765, 700  $\text{cm}^{-1}$

HRMS ( $\text{ESI}^+$ ) calcd for  $\text{C}_{23}\text{H}_{26}\text{N}_2\text{Na}_1\text{O}_3\text{S}_1$  ( $\text{M}+\text{Na}$ ) $^+$  433.1556, found 433.1551.

### **tert-Butyl 7-cyano-7-(naphthalen-2-yl)-4-oxo-6-phenylhept-6-enylcarbamate (3i)**

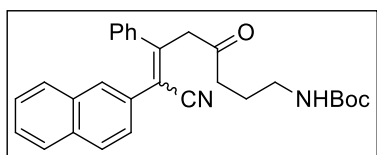

99% yield, yellow oil

$^1\text{H}$  NMR (300 MHz,  $\text{CDCl}_3$ )  $\delta$  (isomeric ratio 50:50) 7.92–7.79 (m, 5H), 7.73–7.67 (m, 2H), 7.40–7.57 (m, 11H), 7.23–7.14 (m, 3H), 7.11 (d,  $J = 1.6$  Hz, 1H), 7.09 (dd,  $J = 8.6, 1.8$  Hz, 1H), 7.04 (dd,  $J = 8.6, 1.8$  Hz, 1H), 4.68 (br s, 1H), 4.52 (br s, 1H), 4.08 (s, 2H), 3.72 (s, 2H), 3.10 (br q,

$J = 6.4$  Hz, 2H), 2.94 (br q,  $J = 6.4$  Hz, 2H), 2.60 (t,  $J = 7.1$  Hz, 2H), 2.26 (t,  $J = 7.1$  Hz, 2H), 1.77 (pent,  $J = 7.0$  Hz, 2H), 1.58 (pent,  $J = 7.0$  Hz, 2H), 1.43 (s, 9H), 1.39 (s, 9H)

$^{13}\text{C}$  NMR (75 MHz,  $\text{CDCl}_3$ )  $\delta$  (isomeric ratio 50:50) 205.54, 204.51, 155.98, 155.86, 152.84, 151.31, 138.89, 137.84, 133.07, 132.92, 132.78, 132.61, 131.26, 130.50, 129.44, 129.10, 128.83, 128.67, 128.53, 128.44, 128.12, 128.10, 128.04, 127.72, 127.64, 127.42, 127.03, 126.79, 126.38, 126.35, 125.56, 118.72, 118.53, 115.40, 115.30, 79.02, 52.19, 48.59, 40.27, 40.03, 39.49, 39.40, 28.26, 28.21, 23.83, 23.73

IR (UATR)  $\nu_{\text{max}}$  3386, 2976, 2212, 1707, 1506, 1366, 1249, 1166, 861, 820, 750, 699  $\text{cm}^{-1}$

HRMS ( $\text{ESI}^+$ ) calcd for  $\text{C}_{29}\text{H}_{30}\text{N}_2\text{Na}_1\text{O}_3$  ( $\text{M}+\text{Na}$ ) $^+$  477.2149, found 477.2150.

**tert-Butyl 7-cyano-6-(3,4-dimethoxyphenyl)-4-oxo-7-phenylhept-6-enylcarbamate (3j)**

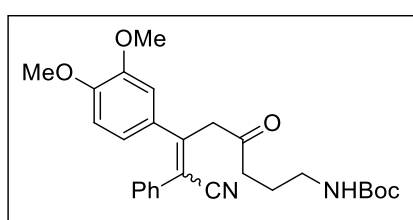

89% yield, yellow oil

$^1\text{H}$  NMR (300 MHz,  $\text{CDCl}_3$ )  $\delta$  (isomeric ratio 50:50) 7.47–7.33 (m, 5H), 7.25–7.14 (m, 5H), 7.12 (d,  $J = 1.7$  Hz, 1H), 7.09 (dd,  $J = 8.3, 1.7$  Hz, 1H), 6.91 (d,  $J = 8.6$  Hz, 1H), 6.73 (s, 2H), 6.48 (s, 1H), 4.77 (br s, 1H), 4.66 (br s, 1H), 4.05 (s, 2H), 3.93 (s, 3H), 3.90 (s, 3H), 3.82 (s, 3H), 3.68 (s, 2H), 3.49 (s, 3H), 3.09 (br q,  $J = 6.4$  Hz, 2H), 2.97 (br q,  $J = 6.4$  Hz, 2H), 2.60 (t,  $J = 7.1$  Hz, 2H), 2.29 (t,  $J = 7.1$  Hz, 2H), 1.76 (pent,  $J = 7.0$  Hz, 2H), 1.61 (pent,  $J = 7.0$  Hz, 2H), 1.43 (s, 9H), 1.41 (s, 9H)

$^{13}\text{C}$  NMR (75 MHz,  $\text{CDCl}_3$ )  $\delta$  (isomeric ratio 50:50) 205.70, 204.79, 155.95, 155.87, 152.17, 150.87, 150.00, 149.47, 148.69, 148.28, 134.25, 133.62, 131.09, 129.76, 129.27, 128.98, 128.93, 128.50, 128.41, 128.22, 121.21, 120.56, 118.95, 118.88, 114.07, 113.99, 112.30, 111.16, 110.91, 110.71, 79.05, 55.96, 55.75, 55.62, 55.41, 51.77, 48.35, 40.12, 39.86, 39.45, 28.23, 28.21, 23.88, 23.79

IR (UATR)  $\nu_{\text{max}}$  3379, 2932, 2211, 1699, 1513, 1366, 1249, 1168, 766, 701  $\text{cm}^{-1}$

HRMS ( $\text{ESI}^+$ ) calcd for  $\text{C}_{27}\text{H}_{32}\text{N}_2\text{Na}_1\text{O}_5$  ( $\text{M}+\text{Na}$ ) $^+$  487.2203, found 487.2186

**tert-Butyl 7-cyano-6-(4-chlorophenyl)-4-oxo-7-phenylhept-6-enylcarbamate (3k)**

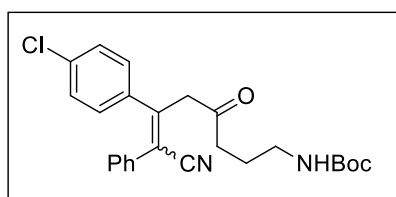

90% yield, yellow oil

$^1\text{H}$  NMR (300 MHz,  $\text{CDCl}_3$ )  $\delta$  (isomeric ratio 45:55) 7.48–7.32 (m, 9H), 7.24–7.10 (m, 7H), 7.00 (d,  $J = 8.5$  Hz, 2H), 4.77 (br s, 1H), 4.66 (br s, 1H), 4.02 (s, 2H), 3.66 (s, 2H), 3.09 (br q,  $J = 6.4$  Hz, 2H), 2.98 (br q,  $J = 6.4$  Hz, 2H), 2.56 (t,  $J = 7.1$  Hz, 2H), 2.28 (t,  $J = 7.1$  Hz, 2H), 1.75 (pent,  $J = 7.0$  Hz, 2H), 1.60 (pent,  $J = 7.0$  Hz, 2H), 1.42 (s, 9H), 1.40 (s, 9H)

$^{13}\text{C}$  NMR (75 MHz,  $\text{CDCl}_3$ )  $\delta$  (isomeric ratio 45:55) 205.27, 204.33, 155.93, 155.85, 151.41, 149.93, 137.33, 136.23, 135.27, 134.61, 133.54, 132.68, 129.79, 129.21, 129.19, 129.12, 128.95, 128.82, 128.65, 128.52, 128.39, 128.29, 118.26, 118.18, 115.90, 115.69, 78.97, 51.73, 48.31, 40.06, 39.94, 39.32, 28.19, 28.17, 23.81, 23.71

IR (UATR)  $\nu_{\text{max}}$  3365, 2977, 2215, 1704, 1492, 1366, 1249, 1165, 1093, 833, 765, 699  $\text{cm}^{-1}$

HRMS ( $\text{ESI}^+$ ) calcd for  $\text{C}_{25}\text{H}_{27}\text{Cl}_1\text{N}_2\text{Na}_1\text{O}_3$  ( $\text{M}+\text{Na}$ ) $^+$  461.1602, found 461.1591.

**tert-Butyl 7-cyano-6-{4-(*N*-tert-butoxycarbonyl)aminophenyl}-4-oxo-7-phenylhept-6-enyl carbamate (3l)**

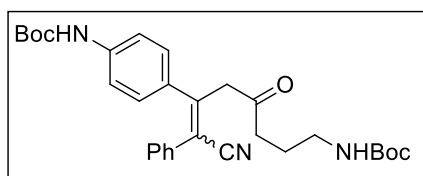

91% yield, white foam

$^1\text{H}$  NMR (300 MHz,  $\text{CDCl}_3$ )  $\delta$  (isomeric ratio 54:46) 7.45 (s, 4H), 7.43–7.35 (m, 5H), 7.22 (d,  $J = 8.7$  Hz, 2H), 7.22–7.14 (m, 5H), 6.98 (d,  $J = 8.7$  Hz, 2H), 6.77 (br s, 1H), 6.64 (br s, 1H), 4.64 (br s, 1H), 4.53 (br s, 1H), 4.02 (s, 2H), , 3.66 (s, 2H), 3.08 (br q,  $J = 6.5$  Hz, 2H), 2.97 (br q,  $J = 6.5$  Hz, 2H), 2.57 (t,  $J = 7.1$  Hz, 2H), 2.28 (t,  $J = 7.1$  Hz, 2H), 1.75 (pent,  $J = 7.0$  Hz, 2H), 1.60 (pent,  $J = 7.0$  Hz, 2H), 1.52 (s, 9H), 1.49 (s, 9H), 1.43 (s, 9H), 1.41 (s, 9H)

$^{13}\text{C}$  NMR (75 MHz,  $\text{CDCl}_3$ )  $\delta$  (isomeric ratio 54:46) 205.62, 204.73, 155.95, 155.89, 152.48, 152.37, 152.16, 150.72, 139.81, 139.18, 134.13, 133.26, 132.83, 131.63, 129.36, 129.27, 128.98, 128.90, 128.55, 128.46, 128.34, 128.24, 118.83, 118.80, 118.16, 117.89, 114.42, 114.16, 80.58, 79.01, 51.91, 48.27, 40.18, 39.89, 39.46, 28.24, 28.23, 28.14, 28.10, 23.79, 23.69

IR (UATR)  $\nu_{\text{max}}$  3344, 2977, 2209, 1705, 1589, 1520, 1234, 1155, 1052, 840, 765, 699  $\text{cm}^{-1}$

HRMS ( $\text{ESI}^+$ ) calcd for  $\text{C}_{30}\text{H}_{37}\text{N}_3\text{Na}_1\text{O}_5$  ( $\text{M}+\text{Na}$ ) $^+$  542.2625, found 542.2641.

**tert-Butyl 7-cyano-6-(pyridin-3-yl)-4-oxo-7-phenylhept-6-enylcarbamate (3m)**

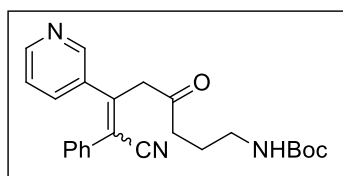

75% yield, yellow oil

$^1\text{H}$  NMR (300 MHz,  $\text{CDCl}_3$ )  $\delta$  (isomeric ratio 45:55) 8.71 (d,  $J = 1.9$  Hz, 1H), 8.64 (dd,  $J = 4.9, 1.5$  Hz, 1H), 8.45 (dd,  $J = 4.9, 1.5$  Hz, 1H), 8.30 (d,  $J = 1.7$  Hz, 1H), 7.90 (ddd,  $J = 8.0, 2.2, 1.7$  Hz, 1H), 7.46–7.34 (m, 7H), 7.23–7.10 (m, 6H), 4.81 (br s, 1H), 4.71 (br s, 1H), 4.07 (s, 2H), 3.72 (s, 2H), 3.11 (br q,  $J = 6.4$  Hz, 2H), 2.99 (br q,  $J = 6.4$  Hz, 2H), 2.62 (t,  $J = 7.1$  Hz, 2H), 2.33 (t,  $J = 7.1$  Hz, 2H), 1.78 (pent,  $J = 7.0$  Hz, 2H), 1.63 (pent,  $J = 7.0$  Hz, 2H), 1.43 (s, 9H), 1.41 (s, 9H)

$^{13}\text{C}$  NMR (75 MHz,  $\text{CDCl}_3$ )  $\delta$  (isomeric ratio 45:55) 205.16, 204.30, 156.05, 155.97, 150.08, 149.32, 149.28, 148.81, 148.01, 147.85, 136.20, 135.90, 135.18, 134.13, 133.24, 132.35, 129.49, 129.36, 129.08, 128.86, 128.61, 128.32, 123.43, 123.17, 117.94, 117.83, 117.30, 117.21, 79.14, 51.49, 48.35, 40.07, 39.38, 28.26, 28.24, 23.93, 23.84

IR (UATR)  $\nu_{\text{max}}$  3332, 2976, 2156, 1701, 1634, 1522, 1367, 1250, 1168, 701  $\text{cm}^{-1}$

HRMS ( $\text{ESI}^+$ ) calcd for  $\text{C}_{24}\text{H}_{27}\text{N}_3\text{Na}_1\text{O}_3$  ( $\text{M}+\text{Na}$ ) $^+$  428.1945, found 428.1950.

**tert-Butyl 7-cyano-6-(thiophen-2-yl)-4-oxo-7-phenylhept-6-enylcarbamate (3n)**

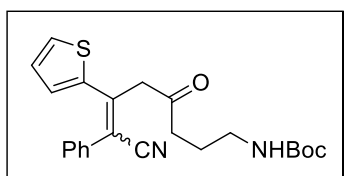

92% yield, yellow oil

$^1\text{H}$  NMR (300 MHz,  $\text{CDCl}_3$ )  $\delta$  (isomeric ratio 44:56) 7.71 (d,  $J = 1.4$  Hz, 1H), 7.46–7.16 (m, 13H), 7.07 (dd,  $J = 5.0, 3.0$  Hz, 1H), 6.56 (d,  $J = 5.0$  Hz, 1H), 4.86 (br s, 1H), 4.77 (br s, 1H), 4.03 (s, 2H), 3.65 (s, 2H), 3.08 (br q,  $J = 6.3$  Hz, 2H), 2.98 (br q,  $J = 6.3$  Hz, 2H), 2.60 (t,  $J = 7.1$  Hz, 2H), 2.31 (t,  $J = 7.1$  Hz, 2H), 1.76 (pent,  $J = 6.9$  Hz, 2H), 1.62 (pent,  $J = 6.9$  Hz, 2H) 1.43 (s, 9H), 1.41 (s, 9H)

$^{13}\text{C}$  NMR (75 MHz,  $\text{CDCl}_3$ )  $\delta$  (isomeric ratio 44:56) 205.55, 204.71, 155.88, 155.81, 145.98, 145.25, 138.75, 137.90, 134.03, 133.44, 128.98, 128.92, 128.84, 128.59, 128.47, 128.36, 127.46, 126.83, 126.73, 126.31, 126.16, 125.52, 119.00, 118.65, 113.92, 112.59, 78.81, 51.55, 48.05, 39.69, 39.48, 39.25, 28.12, 23.72, 23.63

IR (UATR)  $\nu_{\text{max}}$  3378, 2976, 2211, 1708, 1687, 1595, 1515, 1366, 1249, 1167, 1046, 765, 698  $\text{cm}^{-1}$

HRMS ( $\text{ESI}^+$ ) calcd for  $\text{C}_{23}\text{H}_{26}\text{N}_2\text{Na}_1\text{O}_3\text{S}_1$  ( $\text{M}+\text{Na}$ ) $^+$  433.1556, found 433.1572.

**tert-Butyl 7-cyano-6-butyl-4-oxo-7-phenylhept-6-enylcarbamate (3o)**

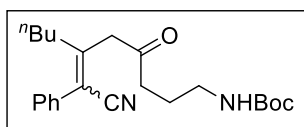

94% yield, yellow oil



$^1\text{H}$  NMR (300 MHz,  $\text{CDCl}_3$ )  $\delta$  (isomeric ratio 23:77) 7.43–7.19 (m, 10H), 4.94 (br s, 1H), 4.85 (br s, 1H), 3.71 (s, 2H), 3.33 (s, 2H), 3.15 (br q,  $J = 6.4$  Hz, 2H), 3.05 (br q,  $J = 6.3$  Hz, 2H), 2.64 (t,  $J = 7.1$  Hz, 2H), 2.58 (dd,  $J = 8.0, 7.5$  Hz, 2H), 2.35 (t,  $J = 7.1$  Hz, 2H), 2.24 (dd,  $J = 8.0, 7.5$  Hz, 2H), 1.82 (pent,  $J = 6.9$  Hz, 2H), 1.68 (pent,  $J = 6.9$  Hz, 2H), 1.59–1.13 (m, 4H), 1.44 (s, 9H), 1.42 (s, 9H), 0.92 (t,  $J = 7.1$  Hz, 3H), 0.79 (t,  $J = 7.2$  Hz, 3H)

$^{13}\text{C}$  NMR (75 MHz,  $\text{CDCl}_3$ )  $\delta$  (isomeric ratio 23:77) 205.57, 204.73, 155.86, 155.16, 133.50, 133.08, 128.64, 128.55, 128.48, 128.38, 128.31, 118.21, 117.76, 114.23, 113.82, 78.76, 48.39, 45.49, 39.76, 39.73, 39.25, 36.32, 32.55, 29.62, 29.33, 28.09, 28.08, 23.78, 23.72, 22.22, 22.16, 13.56, 13.33

IR (UATR)  $\nu_{\text{max}}$  3390, 2966, 2202, 1680, 1615, 1509, 1413, 1364, 1252, 1165, 1096, 708  $\text{cm}^{-1}$

HRMS ( $\text{ESI}^+$ ) calcd for  $\text{C}_{23}\text{H}_{33}\text{N}_2\text{O}_3$  ( $\text{M}+\text{H}$ ) $^+$  385.2486, found 385.2499.

**tert-Butyl 7-cyano-7-(4-nitrophenyl)-4-oxo-6-phenylhept-6-enylcarbamate (3p)**

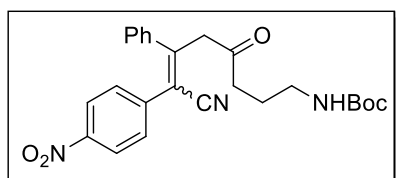

70% yield, yellow oil

$^1\text{H}$  NMR (300 MHz,  $\text{CDCl}_3$ )  $\delta$  (isomeric ratio 60:40) 8.29 (d,  $J = 8.8$  Hz, 2H), 8.03 (d,  $J = 8.8$  Hz, 2H), 7.66 (d,  $J = 8.8$  Hz, 2H), 7.53–7.42 (m, 5H), 7.35–7.22 (m, 5H), 7.05 (dd,  $J = 8.0, 1.6$  Hz, 2H), 4.74 (br s, 1H), 4.63 (br s, 1H), 4.10 (s, 2H), 3.72 (s, 2H), 3.10 (br q,  $J = 6.4$  Hz, 2H), 3.00 (br q,  $J = 6.3$  Hz, 2H), 2.51 (t,  $J = 7.1$  Hz, 2H), 2.35 (t,  $J = 7.0$  Hz, 2H), 1.78 (pent,  $J = 7.0$  Hz, 2H), 1.62 (pent,  $J = 6.8$  Hz, 2H), 1.43 (s, 9H), 1.39 (s, 9H)

$^{13}\text{C}$  NMR (75 MHz,  $\text{CDCl}_3$ )  $\delta$  (isomeric ratio 60:40) 204.93, 203.82, 155.94, 154.94, 147.94, 147.08, 140.11, 139.66, 138.29, 137.08, 130.30, 129.86, 129.78, 129.43, 128.81, 128.76, 128.11, 127.53, 124.11, 123.41, 117.58, 117.54, 113.53, 79.01, 52.19, 48.46, 40.34, 40.18, 39.39, 39.12, 28.21, 28.14, 23.86, 23.82

IR (UATR)  $\nu_{\text{max}}$  3363, 2977, 2213, 1705, 1636, 1518, 1344, 1246, 1166, 1044, 854, 768, 700  $\text{cm}^{-1}$

HRMS ( $\text{ESI}^+$ ) calcd for  $\text{C}_{25}\text{H}_{27}\text{N}_3\text{Na}_1\text{O}_5$  ( $\text{M}+\text{Na}$ ) $^+$  472.1843, found 472.1842.

**tert-Butyl 7-cyano-6-(4-nitrophenyl)-4-oxo-7-phenylhept-6-enylcarbamate (3q)**

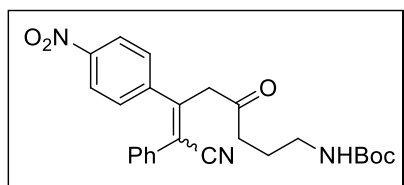

68% yield, yellow oil

$^1\text{H}$  NMR (300 MHz,  $\text{CDCl}_3$ )  $\delta$  (isomeric ratio 46:54) 8.27 (d,  $J = 8.7$  Hz, 2H), 8.05 (d,  $J = 8.7$  Hz, 2H), 7.70 (d,  $J = 8.7$  Hz, 2H), 7.48–7.34 (m, 5H), 7.28 (d,  $J = 8.7$  Hz, 2H), 7.27–7.08 (m, 5H), 4.80 (br s, 1H), 4.69 (br s, 1H), 4.10 (s, 2H), 3.76 (s, 2H), 3.11 (br q,  $J = 6.4$  Hz, 2H), 3.00 (br q,  $J = 6.4$  Hz, 2H), 2.62 (t,  $J = 7.1$  Hz, 2H), 2.33 (t,  $J = 7.1$  Hz, 2H), 1.78 (pent,  $J = 7.0$  Hz, 2H), 1.63 (pent,  $J = 7.0$  Hz, 2H), 1.42 (s, 9H), 1.40 (s, 9H)

$^{13}\text{C}$  NMR (75 MHz,  $\text{CDCl}_3$ )  $\delta$  (isomeric ratio 46:54) 205.10, 204.18, 155.98, 155.90, 150.52, 148.94, 147.83, 147.21, 145.54, 144.68, 132.89, 132.10, 129.57, 129.18, 129.06, 129.01, 128.57, 128.20, 123.75, 123.50, 117.68, 117.59, 117.20, 78.99, 51.34, 48.24, 39.92, 39.85, 39.23, 28.16, 28.14, 23.87, 23.78

IR (UATR)  $\nu_{\text{max}}$  3363, 2977, 2215, 1701, 1597, 1521, 1346, 1249, 1167, 857, 763, 700  $\text{cm}^{-1}$

HRMS (ESI $^+$ ) calcd for  $\text{C}_{25}\text{H}_{27}\text{N}_3\text{Na}_1\text{O}_5$  ( $\text{M}+\text{Na}$ ) $^+$  472.1843, found 472.1835.

**tert-Butyl 7-cyano-6-(3,4-dimethoxyphenyl)-7-(4-methoxyphenyl)-4-oxohept-6-enylcarbamate**

**(3r)**

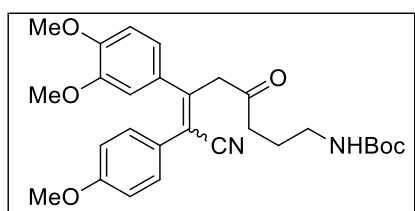

91% yield, yellow oil

$^1\text{H}$  NMR (300 MHz,  $\text{CDCl}_3$ )  $\delta$  (isomeric ratio 50:50) 7.32 (d,  $J = 8.8$  Hz, 2H), 7.10 (d,  $J = 8.8$  Hz, 2H), 7.06 (dd,  $J = 8.4, 2.1$  Hz, 2H), 6.94 (d,  $J = 8.8$  Hz, 2H), 6.77–6.68 (m, 4H), 6.53 (d,  $J = 1.8$  Hz, 1H), 4.64 (br s, 1H), 4.54 (br s, 1H), 4.02 (s, 2H), 3.94 (s, 3H), 3.91 (s, 3H), 3.844 (s, 3H), 3.837 (s, 3H), 3.76 (s, 3H), 3.69 (s, 2H), 3.57 (s, 3H), 3.10 (br q,  $J = 6.5$  Hz, 2H), 3.00 (br q,  $J = 6.5$  Hz, 2H), 2.59 (t,  $J = 7.1$  Hz, 2H), 2.32 (t,  $J = 7.1$  Hz, 2H), 1.77 (pent,  $J = 7.0$  Hz, 2H), 1.63 (pent,  $J = 7.0$  Hz, 2H), 1.43 (s, 9H), 1.41 (s, 9H)

$^{13}\text{C}$  NMR (75 MHz,  $\text{CDCl}_3$ )  $\delta$  (isomeric ratio 50:50) 205.91, 205.02, 160.04, 159.42, 155.98, 155.91, 151.29, 149.99, 149.39, 149.31, 148.77, 148.49, 131.33, 130.66, 130.20, 129.93, 126.54, 125.81, 121.23, 120.59, 119.18, 119.07, 114.33, 113.93, 113.83, 112.15, 111.26, 110.99, 110.85, 79.12, 56.04, 55.82, 55.70, 55.59, 55.28, 55.18, 51.97, 48.50, 40.25, 39.90, 39.57, 28.31, 28.28, 23.96, 23.90

IR (UATR)  $\nu_{\text{max}}$  3393, 2936, 2155, 1709, 1606, 1513, 1252, 1174, 1026, 836, 767  $\text{cm}^{-1}$

HRMS (ESI $^+$ ) calcd for  $\text{C}_{28}\text{H}_{34}\text{N}_2\text{Na}_1\text{O}_6$  ( $\text{M}+\text{Na}$ ) $^+$  517.2309, found 517.2305.

**(R)-Diethyl 8-[(*tert*-butoxycarbonyl)amino]-2-cyano-5-oxo-3-phenylnon-2-enedioate (3s)**

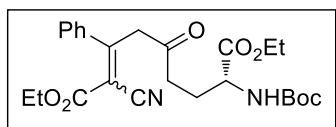

Quantitative yield, yellow oil (using in the next step without purification)

$^1\text{H}$  NMR (300 MHz,  $\text{CDCl}_3$ )  $\delta$  7.45 (s, 5H), 5.21 (d,  $J = 8.2$  Hz, 1H), 4.29 (t,  $J = 7.1$  Hz, 2H), 4.28–4.20 (m, 3H), 4.17 (t,  $J = 7.1$  Hz, 2H), 2.80–2.59 (m, 2H), 2.30–2.10 (m, 1H), 1.95–1.80 (m, 1H), 1.42 (s, 9H), 1.35 (t,  $J = 7.1$  Hz, 3H), 1.26 (t,  $J = 7.1$  Hz, 3H)

$^{13}\text{C}$  NMR (75 MHz,  $\text{CDCl}_3$ )  $\delta$  202.63, 172.07, 167.66, 161.89, 155.29, 139.36, 130.40, 128.57, 127.33, 115.49, 106.77, 79.65, 62.10, 61.25, 52.49, 49.93, 38.41, 28.05, 13.92, 13.81

***tert*-Butyl 8-cyano-7,8-diphenyl-5-oxooct-7-enylcarbamate (6c)**

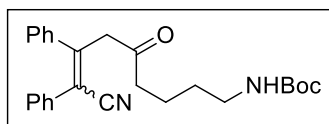

89% yield, yellow oil

$^1\text{H}$  NMR (300 MHz,  $\text{CDCl}_3$ )  $\delta$  (isomeric ratio 45:55) 7.52–7.36 (m, 11H), 7.23–7.02 (m, 9H), 4.71 (br s, 1H), 4.64 (br s, 1H), 4.02 (s, 2H), 3.66 (s, 2H), 3.06 (br q,  $J = 6.3$  Hz, 2H), 2.97 (br q,  $J = 6.3$  Hz, 2H), 2.54 (t,  $J = 7.1$  Hz, 2H), 2.26 (t,  $J = 7.1$  Hz, 2H), 1.65–1.52 (m, 2H), 1.52–1.32 (m, 4H), 1.42 (s, 18H), 1.32–1.20 (m, 2H)

$^{13}\text{C}$  NMR (75 MHz,  $\text{CDCl}_3$ )  $\delta$  (isomeric ratio 45:55) 205.71, 204.65, 155.82, 152.67, 151.25, 138.87, 137.77, 133.88, 132.96, 129.27, 129.22, 129.05, 128.85, 128.61, 128.54, 128.38, 128.37, 128.26, 128.23, 128.18, 127.60, 118.50, 118.42, 115.40, 115.15, 78.86, 52.06, 48.44, 42.51, 42.32, 39.82, 39.66, 29.04, 28.96, 28.20, 20.39, 20.25

IR (UATR)  $\nu_{\text{max}}$  3382, 2934, 2215, 1710, 1512, 1366, 1249, 1169, 764, 699  $\text{cm}^{-1}$

HRMS ( $\text{ESI}^+$ ) calcd for  $\text{C}_{26}\text{H}_{30}\text{N}_2\text{Na}_1\text{O}_3$  ( $\text{M}+\text{Na}$ ) $^+$  441.2149, found 441.2154.

***tert*-Butyl 8-cyano-8-(3,4-dimethoxyphenyl)-5-oxo-7-phenyloct-7-enylcarbamate (6d)**

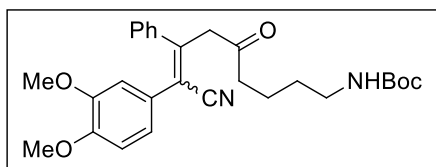

74% yield, yellow oil

$^1\text{H}$  NMR (300 MHz,  $\text{CDCl}_3$ )  $\delta$  (isomeric ratio 48:52) 7.50–7.39 (m, 5H), 7.27–7.23 (m, 3H), 7.13–7.07 (m, 2H), 7.00–6.95 (m, 2H), 6.90 (d,  $J = 8.4$  Hz, 1H), 6.87 (dd,  $J = 8.4, 2.1$  Hz, 1H), 6.71 (d,  $J = 8.4$  Hz, 1H), 6.48 (d,  $J = 2.1$  Hz, 1H), 4.58 (br s, 1H), 4.53 (br s, 1H), 4.01 (s, 2H), 3.91 (s, 3H), 3.88 (s, 3H), 3.83 (s, 3H), 3.70 (s, 2H), 3.48 (s, 3H), 3.08 (br q,  $J = 6.4$  Hz, 2H), 2.99 (br q,  $J =$

6.4 Hz, 2H), 2.55 (t,  $J = 7.1$  Hz, 2H), 2.30 (t,  $J = 7.1$  Hz, 2H), 1.68–1.55 (m, 2H), 1.51–1.24 (m, 6H), 1.43 (s, 9H), 1.42 (s, 9H)

$^{13}\text{C}$  NMR (75 MHz,  $\text{CDCl}_3$ )  $\delta$  (isomeric ratio 48:52) 206.08, 204.89, 155.88, 151.92, 149.73, 149.54, 149.11, 148.26, 139.07, 138.52, 129.37, 128.71, 128.68, 128.57, 128.27, 127.74, 126.50, 125.38, 122.27, 121.24, 118.62, 115.44, 115.32, 112.38, 111.69, 111.25, 110.67, 79.02, 55.96, 55.91, 55.72, 55.38, 52.31, 48.78, 42.87, 42.45, 39.99, 39.86, 29.21, 28.33, 28.32, 20.55, 20.42

IR (UATR)  $\nu_{\text{max}}$  3391, 2935, 2212, 1706, 1599, 1513, 1365, 1247, 1169, 1024, 861, 765, 700  $\text{cm}^{-1}$

HRMS ( $\text{ESI}^+$ ) calcd for  $\text{C}_{28}\text{H}_{34}\text{N}_2\text{Na}_1\text{O}_5$  ( $\text{M}+\text{Na}$ ) $^+$  501.2360, found 501.2347

**tert-Butyl 8-cyano-8-(4-chlorophenyl)-5-oxo-7-phenyloct-7-enylcarbamate (6e)**

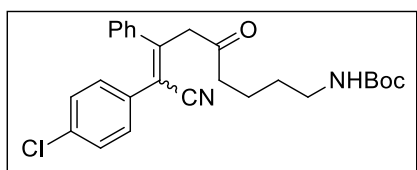

81% yield, yellow oil

$^1\text{H}$  NMR (300 MHz,  $\text{CDCl}_3$ )  $\delta$  (isomeric ratio 48:52) 7.49–7.33 (m, 9H), 7.27–7.20 (m, 3H), 7.15 (d,  $J = 8.6$  Hz, 2H), 7.06 (d,  $J = 8.6$  Hz, 2H), 7.06–7.01 (m, 2H), 4.65 (br s, 1H), 4.59 (br s, 1H), 4.02 (s, 2H), 3.65 (s, 2H), 3.07 (br q,  $J = 6.4$  Hz, 2H), 2.99 (br q,  $J = 6.4$  Hz, 2H), 2.55 (t,  $J = 7.1$  Hz, 2H), 2.29 (t,  $J = 7.1$  Hz, 2H), 1.66–1.55 (m, 2H), 1.52–1.37 (m, 2H), 1.43 (s, 9H), 1.42 (s, 9H), 1.35–1.24 (m, 2H)

$^{13}\text{C}$  NMR (75 MHz,  $\text{CDCl}_3$ )  $\delta$  (isomeric ratio 48:52) 205.54, 204.44, 155.86, 155.83, 153.24, 152.03, 138.68, 137.59, 135.27, 134.33, 132.35, 131.54, 130.61, 129.91, 129.51, 129.16, 128.90, 128.67, 128.62, 128.51, 128.16, 127.59, 118.16, 118.10, 114.37, 114.23, 78.96, 52.14, 48.48, 42.74, 42.45, 39.87, 39.70, 29.13, 29.08, 28.26, 20.46, 20.27

IR (UATR)  $\nu_{\text{max}}$  3382, 2976, 2213, 1710, 1507, 1366, 1249, 1169, 1093, 834, 700  $\text{cm}^{-1}$

HRMS ( $\text{ESI}^+$ ) calcd for  $\text{C}_{26}\text{H}_{29}\text{Cl}_1\text{N}_2\text{Na}_1\text{O}_3$  ( $\text{M}+\text{Na}$ ) $^+$  475.1759, found 475.1754.

**tert-Butyl 8-[4-(N-tert-butoxycarbonyl)aminophenyl]-8-cyano-5-oxo-7-phenyloct-7-enyl carbamate (6f)**

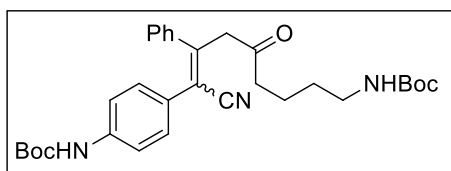

85% yield, yellow oil

$^1\text{H}$  NMR (300 MHz,  $\text{CDCl}_3$ )  $\delta$  (isomeric ratio 50:50) 7.50–7.37 (m, 7H), 7.31 (d,  $J = 8.7$  Hz, 2H), 7.24–7.16 (m, 5H), 7.08–7.02 (m, 4H), 6.89 (br s, 1H), 6.65 (br s, 1H), 4.59 (br s, 2H), 4.00 (s, 2H),

3.67 (s, 2H), 3.07 (br q,  $J = 6.4$  Hz, 2H), 2.99 (br q,  $J = 6.4$  Hz, 2H), 2.54 (t,  $J = 7.1$  Hz, 2H), 2.28 (t,  $J = 7.1$  Hz, 2H), 1.66–1.25 (m, 8H), 1.52 (s, 9H), 1.48 (s, 9H), 1.43 (s, 18H)

$^{13}\text{C}$  NMR (75 MHz,  $\text{CDCl}_3$ )  $\delta$  (isomeric ratio 50:50) 205.94, 204.90, 155.94, 152.57, 152.36, 152.22, 150.13, 139.39, 139.12, 138.58, 138.09, 130.12, 129.35, 129.29, 128.69, 128.62, 128.33, 127.74, 127.34, 118.66, 118.60, 117.82, 115.14, 115.01, 80.87, 80.75, 79.08, 52.29, 48.64, 42.71, 42.44, 39.98, 39.91, 29.20, 28.35, 28.25, 28.21, 20.53

IR (UATR)  $\nu_{\text{max}}$  3344, 2977, 2213, 1709, 1521, 1235, 1158, 1054, 841, 771, 700  $\text{cm}^{-1}$

HRMS ( $\text{ESI}^+$ ) calcd for  $\text{C}_{31}\text{H}_{39}\text{N}_3\text{Na}_1\text{O}_5$  ( $\text{M}+\text{Na}$ ) $^+$  556.2782, found 556.2768.

**tert-Butyl 8-cyano-8-(pyridin-3-yl)-5-oxo-7-phenyloct-7-enylcarbamate (6g)**

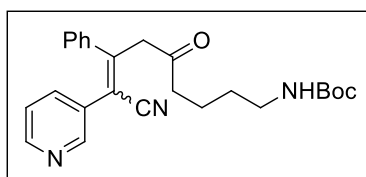

79% yield, yellow oil

$^1\text{H}$  NMR (300 MHz,  $\text{CDCl}_3$ )  $\delta$  (isomeric ratio 55:45) 8.67 (d,  $J = 1.7$  Hz, 1H), 8.65 (dd,  $J = 4.9, 1.5$  Hz, 1H), 8.43 (dd,  $J = 4.9, 1.5$  Hz, 1H), 8.34 (d,  $J = 1.7$  Hz, 1H), 7.79 (dt,  $J = 8.0, 1.8$  Hz, 1H), 7.52–7.42 (m, 6H), 7.39 (dd,  $J = 8.0, 4.9$  Hz, 1H), 7.30–7.19 (m, 3H), 7.15 (ddd,  $J = 8.0, 4.9, 0.6$  Hz, 1H), 7.07–7.01 (m, 2H), 4.66 (br s, 2H), 4.07 (s, 2H), 3.67 (s, 2H), 3.08 (br q,  $J = 6.4$  Hz, 2H), 2.99 (br q,  $J = 6.4$  Hz, 2H), 2.57 (t,  $J = 7.1$  Hz, 2H), 2.31 (t,  $J = 7.0$  Hz, 2H), 1.68–1.56 (m, 2H), 1.51–1.37 (m, 4H), 1.43 (s, 9H), 1.42 (s, 9H), 1.36–1.25 (m, 2H)

$^{13}\text{C}$  NMR (75 MHz,  $\text{CDCl}_3$ )  $\delta$  (isomeric ratio 55:45) 205.26, 204.23, 155.92, 154.66, 153.86, 150.18, 149.95, 149.05, 138.48, 137.20, 136.54, 136.29, 130.21, 129.76, 129.45, 129.21, 128.80, 128.78, 128.16, 127.57, 123.69, 123.03, 117.86, 117.78, 112.30, 112.05, 78.98, 52.15, 48.48, 42.83, 42.56, 39.87, 39.71, 29.15, 29.06, 28.29, 20.47, 20.34,

IR (UATR)  $\nu_{\text{max}}$  3341, 2933, 2212, 1704, 1634, 1516, 1365, 1249, 1168, 767, 701  $\text{cm}^{-1}$

HRMS ( $\text{ESI}^+$ ) calcd for  $\text{C}_{25}\text{H}_{29}\text{N}_3\text{Na}_1\text{O}_3$  ( $\text{M}+\text{Na}$ ) $^+$  442.2101, found 442.2097

**tert-Butyl 8-cyano-8-(thiophen-2-yl)-5-oxo-7-phenyloct-7-enylcarbamate (6h)**

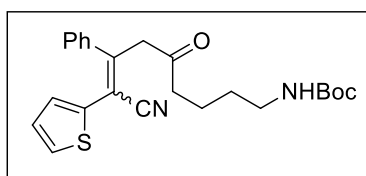

75% yield, yellow oil

$^1\text{H}$  NMR (300 MHz,  $\text{CDCl}_3$ )  $\delta$  (isomeric ratio 60:40) 7.47–7.37 (m, H), 7.29 (dd,  $J = 3.6, 1.1$  Hz, 1H), 7.24–7.18 (m, 4H), 7.12 (dd,  $J = 5.1, 1.1$  Hz, 1H), 7.08 (dd,  $J = 4.7, 3.7$  Hz, 1H), 6.88 (dd,  $J =$

5.1, 3.7 Hz, 1H), 4.53 (br s, 2H), 3.96 (s, 2H), 3.91 (s, 2H), 3.13–2.99 (m, 4H), 2.57 (t,  $J = 7.1$  Hz, 2H), 2.42 (t,  $J = 7.1$  Hz, 2H), 1.67–1.32 (m, 8H), 1.43 (s, 18H)

$^{13}\text{C}$  NMR (75 MHz,  $\text{CDCl}_3$ )  $\delta$  (isomeric ratio 60:40) 204.80, 204.41, 155.82, 152.08, 148.27, 139.32, 137.83, 135.31, 134.95, 129.77, 129.46, 129.38, 129.18, 129.11, 128.59, 128.03, 127.82, 127.64, 127.63, 127.35, 126.10, 117.69, 117.13, 110.82, 109.13, 78.86, 52.69, 49.44, 42.45, 42.41, 39.85, 39.78, 29.11, 28.24, 20.45, 20.30

IR (UATR)  $\nu_{\text{max}}$  3378, 2933, 2218, 1706, 1509, 1365, 1247, 1167, 851, 766, 699  $\text{cm}^{-1}$

HRMS ( $\text{ESI}^+$ ) calcd for  $\text{C}_{24}\text{H}_{28}\text{N}_2\text{Na}_1\text{O}_3\text{S}_1$  ( $\text{M}+\text{Na}$ ) $^+$  447.1713, found 447.1726

**tert-Butyl 8-cyano-8-(naphthalen-2-yl)-5-oxo-7-phenyloct-7-enylcarbamate (6i)**

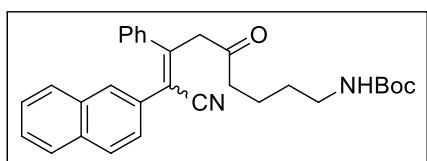

95% yield, yellow oil

$^1\text{H}$  NMR (300 MHz,  $\text{CDCl}_3$ )  $\delta$  (isomeric ratio 50:50) 7.90–7.77 (m, 5H), 7.70–7.64 (m, 2H), 7.55–7.37 (m, 11H), 7.21–7.12 (m, 3H), 7.10–7.05 (m, 2H), 7.03 (dd,  $J = 8.6, 1.8$  Hz, 1H), 4.68 (br s, 1H), 4.54 (br s, 1H), 4.06 (s, 2H), 3.69 (s, 2H), 3.07 (br q,  $J = 6.4$  Hz, 2H), 2.92 (br q,  $J = 6.4$  Hz, 2H), 2.55 (t,  $J = 7.1$  Hz, 2H), 2.22 (t,  $J = 7.1$  Hz, 2H), 1.68–1.54 (m, 2H), 1.49–1.33 (m, 4H), 1.43 (s, 9H), 1.41 (s, 9H), 1.28–1.17 (m, 2H)

$^{13}\text{C}$  NMR (75 MHz,  $\text{CDCl}_3$ )  $\delta$  (isomeric ratio 50:50) 205.71, 204.63, 155.85, 155.77, 152.91, 151.32, 138.94, 137.83, 133.02, 132.88, 132.73, 132.55, 131.28, 130.49, 129.33, 129.04, 128.76, 128.73, 128.59, 128.46, 128.36, 128.04, 128.01, 127.98, 127.66, 127.64, 127.60, 127.37, 126.98, 126.74, 126.33, 126.29, 125.52, 118.64, 118.46, 115.37, 115.19, 78.81, 52.17, 48.58, 42.55, 42.36, 39.85, 39.66, 29.09, 28.99, 28.23, 28.21, 20.43, 20.32

IR (UATR)  $\nu_{\text{max}}$  3384, 2932, 2208, 1709, 1505, 1365, 1248, 1169, 751, 700  $\text{cm}^{-1}$

HRMS ( $\text{ESI}^+$ ) calcd for  $\text{C}_{30}\text{H}_{32}\text{N}_2\text{Na}_1\text{O}_3$  ( $\text{M}+\text{Na}$ ) $^+$  491.2305, found 491.2304

**tert-Butyl 8-cyano-7-(3,4-dimethoxyphenyl)-5-oxo-8-phenyloct-7-enylcarbamate (6j)**

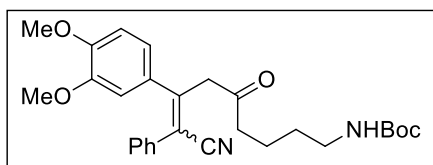

82% yield, yellow oil

$^1\text{H}$  NMR (300 MHz,  $\text{CDCl}_3$ )  $\delta$  (isomeric ratio 48:52) 7.45–7.35 (m, 5H), 7.24–7.15 (m, 5H), 7.11 (d,  $J = 2.1$  Hz, 1H), 7.06 (dd,  $J = 8.3, 2.1$  Hz, 1H), 6.91 (d,  $J = 8.3$  Hz, 1H), 6.74 (d,  $J = 8.4$  Hz, 1H), 6.70 (dd,  $J = 8.4, 1.8$  Hz, 1H), 6.46 (d,  $J = 1.8$  Hz, 1H), 4.65 (br s, 1H), 4.58 (br s, 1H), 4.04,

3.94 (s, 2H), 3.90 (s, 3H), 3.83 (s, 3H), 3.66 (s, 2H), 3.49 (s, 3H), 3.08 (br q,  $J = 6.4$  Hz, 2H), 3.00 (br q,  $J = 6.4$  Hz, 2H), 2.57 (t,  $J = 7.1$  Hz, 2H), 2.28 (t,  $J = 7.1$  Hz, 2H), 1.68–1.57 (m, 2H), 1.52–1.24 (m, 6H), 1.43 (s, 9H), 1.42 (s, 9H)

$^{13}\text{C}$  NMR (75 MHz,  $\text{CDCl}_3$ )  $\delta$  (isomeric ratio 48:52) 205.91, 204.96, 155.87, 155.83, 152.22, 150.86, 150.02, 149.49, 148.72, 148.32, 134.28, 133.64, 131.18, 129.81, 129.28, 128.99, 128.91, 128.51, 128.41, 128.22, 121.14, 120.53, 118.93, 118.85, 114.16, 114.07, 112.35, 111.23, 110.96, 110.75, 78.96, 55.98, 55.77, 55.64, 55.44, 51.83, 48.38, 42.53, 42.30, 39.91, 39.76, 29.18, 29.11, 28.25, 20.46, 20.32

IR (UATR)  $\nu_{\text{max}}$  3362, 2932, 2213, 1699, 1493, 1367, 1250, 1168, 1093, 1014, 834, 765, 700  $\text{cm}^{-1}$

HRMS (ESI<sup>+</sup>) calcd for  $\text{C}_{28}\text{H}_{34}\text{N}_2\text{Na}_1\text{O}_5$  ( $\text{M}+\text{Na}$ )<sup>+</sup> 501.2360, found 501.2344.

**tert-Butyl 7-(4-chlorophenyl)-8-cyano-5-oxo-8-phenyloct-7-enylcarbamate (6k)**

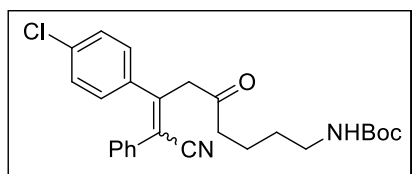

93% yield, yellow oil

$^1\text{H}$  NMR (300 MHz,  $\text{CDCl}_3$ )  $\delta$  (isomeric ratio 47:53) 7.47–7.33 (m, 9H), 7.22–7.10 (m, 7H), 7.00 (d,  $J = 8.6$  Hz, 2H), 4.76 (br s, 1H), 4.69 (br s, 1H), 4.01 (s, 2H), 3.65 (s, 2H), 3.10 (br q,  $J = 6.3$  Hz, 2H), 3.00 (br q,  $J = 6.3$  Hz, 2H), 2.56 (t,  $J = 7.1$  Hz, 2H), 2.28 (t,  $J = 7.0$  Hz, 2H), 1.67–1.53 (m, 2H), 1.43 (s, 9H), 1.42 (s, 9H), 1.50–1.25 (m, 6H)

$^{13}\text{C}$  NMR (75 MHz,  $\text{CDCl}_3$ )  $\delta$  (isomeric ratio 47:53) 205.55, 204.55, 155.78, 151.46, 149.92, 137.34, 136.20, 135.18, 134.54, 133.51, 132.63, 129.71, 129.18, 129.14, 129.07, 128.88, 128.76, 128.60, 128.48, 128.34, 128.23, 118.21, 118.14, 115.88, 115.62, 78.79, 51.71, 48.29, 42.39, 42.32, 39.74, 39.58, 29.02, 28.96, 28.16, 20.34, 20.20

IR (UATR)  $\nu_{\text{max}}$  3363, 2932, 2213, 1703, 1510, 1493, 1366, 1249, 1167, 1093, 833, 764, 700  $\text{cm}^{-1}$

HRMS (ESI<sup>+</sup>) calcd for  $\text{C}_{26}\text{H}_{29}\text{Cl}_1\text{N}_2\text{Na}_1\text{O}_3$  ( $\text{M}+\text{Na}$ )<sup>+</sup> 475.1759, found 475.1747.

**tert-Butyl 7-{4-(*N*-tert-butoxycarbonyl)aminophenyl}-8-cyano-5-oxo-8-phenyl-oct-7-enyl carbamate (6l)**

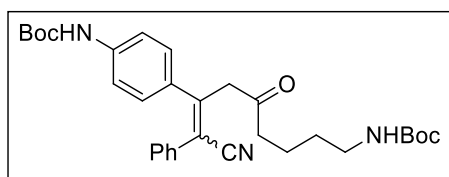

92% yield, white foam

$^1\text{H}$  NMR (300 MHz,  $\text{CDCl}_3$ )  $\delta$  (isomeric ratio 57:43) 7.43 (s, 4H), 7.43–7.35 (m, 5H), 7.22 (d,  $J = 8.7$  Hz, 2H), 7.22–7.14 (m, 5H), 6.97 (d,  $J = 8.7$  Hz, 2H), 6.78 (br s, 1H), 6.65 (br s, 1H), 4.60 (br s,

1H), 4.55 (br s, 1H), 4.01 (s, 2H), , 3.65 (s, 2H), 3.07 (br q,  $J = 6.4$  Hz, 2H), 3.00 (br q,  $J = 6.4$  Hz, 2H), 2.54 (t,  $J = 7.1$  Hz, 2H), 2.28 (t,  $J = 7.1$  Hz, 2H), 1.67–1.24 (m, 8H), 1.52 (s, 9H), 1.49 (s, 9H), 1.43 (s, 18H)

$^{13}\text{C}$  NMR (75 MHz,  $\text{CDCl}_3$ )  $\delta$  (isomeric ratio 57:43) 205.88, 204.92, 155.89, 155.86, 152.51, 152.39, 152.23, 150.74, 139.79, 139.17, 134.13, 133.25, 132.85, 131.61, 129.30, 129.25, 128.95, 128.85, 128.50, 128.43, 128.30, 128.21, 118.80, 118.78, 118.18, 117.90, 114.40, 114.11, 80.52, 78.85, 51.92, 48.27, 42.53, 42.26, 39.88, 39.74, 29.07, 29.01, 28.23, 28.12, 28.08, 20.41, 20.28

IR (UATR)  $\nu_{\text{max}}$  3343, 2977, 2212, 1708, 1590, 1520, 1234, 1155, 1052, 840, 765, 699  $\text{cm}^{-1}$

HRMS ( $\text{ESI}^+$ ) calcd for  $\text{C}_{31}\text{H}_{39}\text{N}_3\text{Na}_1\text{O}_5$  ( $\text{M}+\text{Na}$ ) $^+$  556.2782, found 556.2807.

**tert-Butyl 8-cyano-5-oxo-8-phenyl-7-(pyridin-3-yl)oct-7-enylcarbamate (6m)**

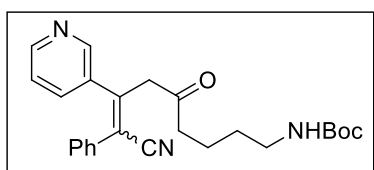

79% yield, yellow oil

$^1\text{H}$  NMR (300 MHz,  $\text{CDCl}_3$ )  $\delta$  (isomeric ratio 47:53) 8.71 (d,  $J = 1.8$  Hz, 1H), 8.62 (dd,  $J = 4.8, 1.5$  Hz, 1H), 8.44 (dd,  $J = 4.8, 1.5$  Hz, 1H), 8.29 (d,  $J = 1.7$  Hz, 1H), 7.88 (dt,  $J = 8.0, 1.8$  Hz, 1H), 7.46–7.33 (m, 7H), 7.22–7.14 (m, 6H), 4.91 (br s, 1H), 4.85 (br s, 1H), 4.06 (s, 2H), 3.70 (s, 2H), 3.09 (br q,  $J = 6.4$  Hz, 2H), 3.00 (br q,  $J = 6.3$  Hz, 2H), 2.58 (t,  $J = 7.10$  Hz, 2H), 2.31 (t,  $J = 7.1$  Hz, 2H), 1.68–1.28 (m, 8H), 1.43 (s, 9H), 1.42 (s, 9H)

$^{13}\text{C}$  NMR (75 MHz,  $\text{CDCl}_3$ )  $\delta$  (isomeric ratio 47:53) 205.37, 204.41, 155.82, 155.78, 149.92, 149.28, 149.19, 148.66, 147.93, 147.80, 135.95, 135.62, 135.07, 133.96, 133.12, 132.24, 129.35, 129.19, 128.91, 128.69, 128.45, 128.15, 123.24, 123.00, 117.78, 117.71, 117.11, 116.95, 78.73, 51.36, 48.21, 42.36, 42.31, 39.69, 39.54, 29.00, 28.94, 28.13, 20.35, 20.21

IR (UATR)  $\nu_{\text{max}}$  3357, 2930, 2155, 1702, 1627, 1522, 1366, 1245, 1168, 1045, 700  $\text{cm}^{-1}$

HRMS ( $\text{ESI}^+$ ) calcd for  $\text{C}_{25}\text{H}_{29}\text{N}_3\text{Na}_1\text{O}_3$  ( $\text{M}+\text{Na}$ ) $^+$  442.2101, found 442.2096.

**tert-Butyl 8-cyano-5-oxo-8-phenyl-7-(thiophen-2-yl)oct-7-enylcarbamate (6n)**

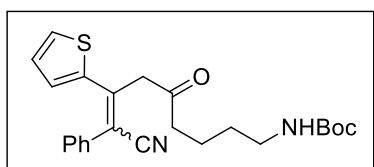

97% yield, yellow oil

$^1\text{H}$  NMR (300 MHz,  $\text{CDCl}_3$ )  $\delta$  (isomeric ratio 46:54) 7.69 (dd,  $J = 2.9, 1.4$  Hz, 1H), 7.43–7.33 (m, 7H), 7.31–7.22 (m, 5H), 7.13 (dd,  $J = 2.9, 1.4$  Hz, 1H), 7.10 (dd,  $J = 5.0, 2.9$  Hz, 1H), 6.58 (dd,  $J = 5.0, 1.4$  Hz, 1H), 4.65 (br s, 1H), 4.60 (br s, 1H), 4.02 (s, 2H), 3.64 (s, 2H), 3.08 (br q,  $J = 6.3$  Hz,



2H), 3.01 (br q,  $J = 6.3$  Hz, 2H), 2.59 (t,  $J = 7.1$  Hz, 2H), 2.32 (t,  $J = 7.1$  Hz, 2H), 1.69–1.57 (m, 2H), 1.55–1.30 (m, 6H), 1.43 (s, 18H)

$^{13}\text{C}$  NMR (75 MHz,  $\text{CDCl}_3$ )  $\delta$  (isomeric ratio 46:54) 205.82, 204.97, 155.80, 146.06, 145.30, 138.83, 137.96, 134.11, 133.49, 129.05, 129.00, 128.88, 128.65, 128.52, 128.44, 127.50, 126.76, 126.68, 126.25, 126.22, 125.63, 119.01, 118.68, 114.17, 112.85, 78.83, 51.70, 48.15, 42.21, 41.99, 39.81, 39.66, 29.02, 28.21, 20.40, 20.28

IR (UATR)  $\nu_{\text{max}}$  3393, 2928, 2206, 1708, 1513, 1366, 1244, 1167, 1045, 768, 700  $\text{cm}^{-1}$

HRMS (ESI $^+$ ) calcd for  $\text{C}_{24}\text{H}_{28}\text{N}_2\text{Na}_1\text{O}_3\text{S}_1$  (M+Na) $^+$  447.1713, found 447.1709.

**tert-Butyl 8-cyano-5-oxo-8-phenyl-7-butyloct-7-enylcarbamate (6o)**

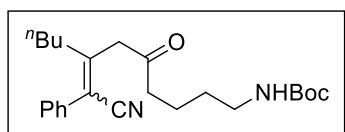

83% yield, yellow oil

$^1\text{H}$  NMR (300 MHz,  $\text{CDCl}_3$ )  $\delta$  (isomeric ratio 27:73) 7.42–7.29 (m, 5H), 7.25–7.20 (m, 5H), 4.62 (br s, 1H), 4.56 (br s, 1H), 3.69 (s, 2H), 3.31 (s, 2H), 3.14 (br q,  $J = 6.4$  Hz, 2H), 3.07 (br q,  $J = 6.4$  Hz, 2H), 2.63 (t,  $J = 7.0$  Hz, 2H), 2.58 (dd,  $J = 8.0, 7.0$  Hz, 2H), 2.33 (t,  $J = 7.1$  Hz, 2H), 2.24 (dd,  $J = 8.0, 7.0$  Hz, 2H), 1.73–1.13 (m, 8H), 1.44 (s, 18H), 0.92 (t,  $J = 7.1$  Hz, 3H), 0.79 (t,  $J = 7.2$  Hz, 3H)

$^{13}\text{C}$  NMR (75 MHz,  $\text{CDCl}_3$ )  $\delta$  (isomeric ratio 27:73) 205.84, 204.98, 155.81, 155.78, 155.08, 154.96, 133.56, 133.13, 128.66, 128.59, 128.52, 128.41, 128.36, 118.22, 117.78, 114.31, 113.90, 78.74, 48.47, 45.55, 42.26, 39.79, 39.65, 36.38, 32.56, 29.64, 29.38, 29.07, 28.14, 22.26, 22.20, 20.43, 20.34, 13.58, 13.36

IR (UATR)  $\nu_{\text{max}}$  3374, 2933, 2131, 1709, 1511, 1366, 1249, 1169, 766, 701  $\text{cm}^{-1}$

HRMS (ESI $^+$ ) calcd for  $\text{C}_{24}\text{H}_{34}\text{N}_2\text{Na}_1\text{O}_3$  (M+Na) $^+$  421.2462, found 421.2465.

**tert-Butyl 8-cyano-8-(4-nitrophenyl)-5-oxo-7-phenyloct-7-enylcarbamate (6p)**

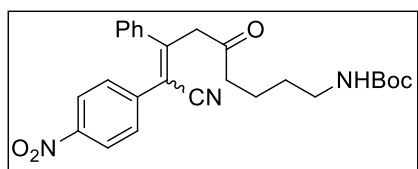

68% yield, yellow oil

$^1\text{H}$  NMR (300 MHz,  $\text{CDCl}_3$ )  $\delta$  (isomeric ratio 65:35) 8.30 (d,  $J = 8.8$  Hz, 2H), 8.03 (d,  $J = 8.8$  Hz, 2H), 7.66 (d,  $J = 8.8$  Hz, 2H), 7.53–7.42 (m, 5H), 7.35–7.22 (m, 5H), 7.05 (dd,  $J = 7.6, 1.6$  Hz, 2H),

4.72 (br s, 1H), 4.66 (br s, 1H), 4.10 (s, 2H), 3.70 (s, 2H), 3.09 (br q,  $J = 6.3$  Hz, 2H), 3.00 (br q,  $J = 6.4$  Hz, 2H), 2.59 (t,  $J = 7.1$  Hz, 2H), 2.35 (t,  $J = 7.1$  Hz, 2H), 1.70–1.58 (m, 2H), 1.53–1.38 (m, 4H), 1.43 (s, 9H), 1.42 (s, 9H), 1.38–1.27 (m, 2H)

$^{13}\text{C}$  NMR (75 MHz,  $\text{CDCl}_3$ )  $\delta$  (isomeric ratio 65:35) 205.29, 204.07, 155.81, 154.96, 147.92, 147.02, 140.14, 139.62, 138.21, 137.05, 130.27, 129.84, 129.72, 129.38, 128.78, 128.73, 128.04, 127.48, 124.05, 123.38, 117.50, 113.52, 113.39, 78.83, 52.19, 48.39, 42.87, 42.53, 39.76, 39.56, 29.04, 28.98, 28.19, 28.17, 20.38, 20.11

IR (UATR)  $\nu_{\text{max}}$  3361, 2934, 2354, 1709, 1597, 1520, 1346, 1249, 1168, 855, 769, 700  $\text{cm}^{-1}$

HRMS ( $\text{ESI}^+$ ) calcd for  $\text{C}_{26}\text{H}_{29}\text{N}_3\text{Na}_1\text{O}_5$  ( $\text{M}+\text{Na}$ ) $^+$  486.1999, found 486.1994.

**tert-Butyl 8-cyano-7-(4-nitrophenyl)-5-oxo-8-phenyloct-7-enylcarbamate (6q)**

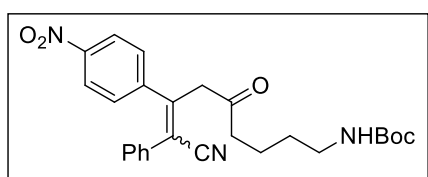

67% yield, yellow oil

$^1\text{H}$  NMR (300 MHz,  $\text{CDCl}_3$ )  $\delta$  (isomeric ratio 48:52) 8.28 (d,  $J = 8.8$  Hz, 2H), 8.06 (d,  $J = 8.8$  Hz, 2H), 7.69 (d,  $J = 8.8$  Hz, 2H), 7.42–7.48 (m, 3H), 7.34–7.39 (m, 2H), 7.17–7.30 (m, 5H), 7.14 (dd,  $J = 7.8, 1.7$  Hz, 2H), 4.68 (br s, 1H), 4.62 (br s, 1H), 4.07 (s, 2H), 3.72 (s, 2H), 3.09 (br q,  $J = 6.4$  Hz, 2H), 3.01 (br q,  $J = 6.4$  Hz, 2H), 2.60 (t,  $J = 7.1$  Hz, 2H), 2.33 (t,  $J = 7.1$  Hz, 2H), 1.71–1.58 (m, 2H), 1.56–1.32 (m, 6H), 1.43 (s, 9H), 1.42 (s, 9H)

$^{13}\text{C}$  NMR (75 MHz,  $\text{CDCl}_3$ )  $\delta$  (isomeric ratio 48:52) 205.36, 204.43, 155.87, 150.52, 148.92, 147.95, 147.32, 145.60, 144.77, 132.97, 132.13, 129.64, 129.54, 129.23, 129.10, 129.07, 129.01, 128.62, 128.25, 126.44, 123.84, 123.59, 117.78, 117.68, 117.57, 117.35, 79.00, 51.46, 48.36, 42.49, 42.37, 39.80, 39.64, 29.16, 29.11, 28.24, 28.23, 20.44, 20.29

IR (UATR)  $\nu_{\text{max}}$  3362, 2933, 2213, 1701, 1598, 1521, 1347, 1249, 1168, 857, 763, 700  $\text{cm}^{-1}$

HRMS ( $\text{ESI}^+$ ) calcd for  $\text{C}_{26}\text{H}_{29}\text{N}_3\text{Na}_1\text{O}_5$  ( $\text{M}+\text{Na}$ ) $^+$  486.1999, found 486.1980.

**tert-Butyl 8-cyano-7-(3,4-dimethoxyphenyl)-8-(4-methoxyphenyl)-5-oxooct-7-enylcarbamate (6r)**

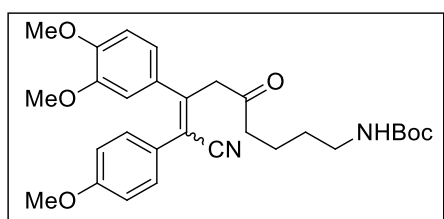

92% yield, yellow oil

$^1\text{H}$  NMR (300 MHz,  $\text{CDCl}_3$ )  $\delta$  (isomeric ratio 46:54) 7.29 (d,  $J = 8.8$  Hz, 2H), 7.08 (d,  $J = 8.8$  Hz, 3H), 7.02 (dd,  $J = 8.3, 2.1$  Hz, 1H), 6.91 (d,  $J = 8.8$  Hz, 3H), 6.86 (s, 1H), 6.75–6.64 (m, 3H), 6.50 (d,  $J = 1.8$  Hz, 1H), 4.66 (br s, 1H), 4.60 (br s, 1H), 4.02 (s, 2H), 3.98 (s, 2H), 3.90 (s, 3H), 3.87 (s, 3H), 3.81 (s, 3H), 3.80 (s, 3H), 3.72 (s, 3H), 3.65 (s, 2H), 3.53 (s, 3H), 3.05 (br q,  $J = 6.4$  Hz, 2H), 2.98 (br q,  $J = 6.4$  Hz, 2H), 2.54 (t,  $J = 7.1$  Hz, 2H), 2.28 (t,  $J = 7.1$  Hz, 2H), 1.64–1.53 (m, 2H), 1.52–1.22 (m, 6H), 1.40 (s, 18H)

$^{13}\text{C}$  NMR (75 MHz,  $\text{CDCl}_3$ )  $\delta$  (isomeric ratio 46:54) 206.09, 205.13, 159.95, 159.32, 155.83, 151.35, 149.88, 149.30, 149.27, 148.66, 148.40, 131.33, 130.55, 130.13, 129.81, 126.46, 125.74, 121.10, 120.48, 119.09, 118.95, 114.22, 113.85, 113.80, 113.74, 112.12, 111.24, 110.93, 110.80, 78.92, 55.94, 55.72, 55.61, 55.49, 55.18, 55.07, 51.89, 48.40, 42.54, 42.22, 39.89, 39.75, 29.12, 28.22, 20.44, 20.30

IR (UATR)  $\nu_{\text{max}}$  3390, 2936, 2208, 1709, 1606, 1513, 1251, 1174, 1025, 836, 767  $\text{cm}^{-1}$

HRMS (ESI $^+$ ) calcd for  $\text{C}_{29}\text{H}_{36}\text{N}_2\text{Na}_1\text{O}_6$  ( $\text{M}+\text{Na}$ ) $^+$  531.2466, found 531.2474.

#### 4. Trial for the transformation of 2-pyrone to bicyclic 2-pyridone

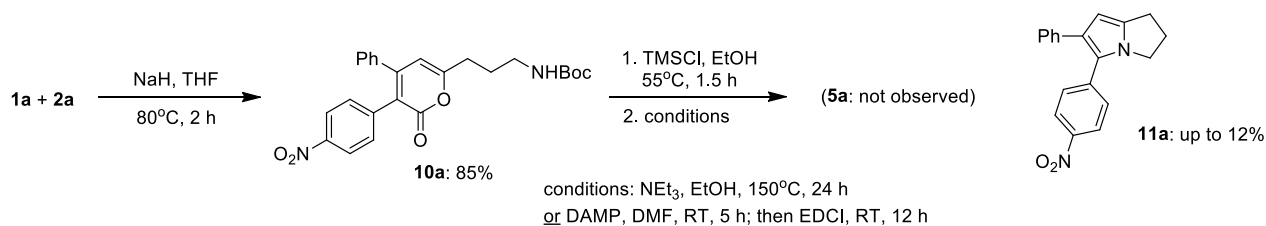

Employing the reported conditions for the intramolecular lactamization for 2-pyrone **10a** gave contrasting results to our observed data, in which the pyrrolizine **11a** was formed in low yield, instead of the corresponding bicyclic 2-pyridone.

I) A 2-pyrone **10a** were prepared using literature reported methodologies.<sup>2)</sup>

A solution of alkyne **1a** (0.35 mmol) in THF (1.0 mL) were added to a mixture of active methylene (**2a**) (1.1 equiv.) and NaH (0.25 equiv.) in THF (1.0 mL) at room temperature. The reaction was further stirred at refluxing for 5 h., then, cooled down to room temperature and neutralized with sat.  $\text{NH}_4\text{Cl}$  solution. The products were extracted with EtOAc. The combined organic layers were washed with water, dried over  $\text{Na}_2\text{SO}_4$ , and the solvent was concentrated under reduced pressure to obtain crude product which was purified by silica gel column chromatography using hexanes and increasing proportion of EtOAc as eluents to afford 2-pyrone **10a**.

II) Trial for transformation of 2-pyrone **10a** to the corresponding 2-pyridone **5a** was performed using modified procedures according to literatures.<sup>3-5)</sup>

Under thermal base condition: In a round-bottomed flask, a solution of compound **10a** (103 mg, 0.23 mmol) in ethanol (3 mL) was added trimethylsilyl chloride (5 equiv.) at room temperature and

heated at 55°C for 1.5 h. The reaction was cooled down to room temperature and concentrated under reduced pressure. Then, the un-purified de-Boc product (**deBoc-10a**) was transferred to a pressure tube and ethanol (3 mL) and NEt<sub>3</sub> (1.6 mL, 50 equiv.) were added. The mixture was heated at 150°C for 24 h. The reaction was cooled down to room temperature, diluted with water and extracted with EtOAc. The organic solvent was washed with water, dried over Na<sub>2</sub>SO<sub>4</sub>, and the solvent was concentrated under reduced pressure. The obtained solid was purified by column chromatography on silica gel using hexanes and EtOAc as eluents to give pyrrolizine **11a**.

Employing EDCI as carboxyl activating agent: A solution of the un-purified de-Boc product (**deBoc-10a**, from **10a** 148.5 mg, 0.33 mmol) in DMF (1 mL) was added DMAP (50.4 mg, 1.3 equiv.) and the reaction was stirred at room temperature for 5 h. After that, EDCI (62.0 mg, 1.3 equiv.) was directly added and the mixture was further stirred at room temperature for 12 h. The reaction was diluted with water and extracted with EtOAc. The combined organic phase was washed with water, dried over Na<sub>2</sub>SO<sub>4</sub>, and the solvent was concentrated to dryness under reduced pressure. The obtained solid was purified by column chromatography on silica gel using hexanes and EtOAc as eluents to give pyrrolizine **11a**.

#### **6-[3-(*tert*-Butoxycarbonylamino)propyl]-3-(4-nitrophenyl)-4-phenyl-2H-pyran-2-one (10a)**

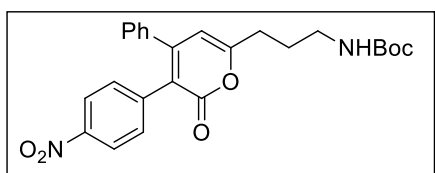

85% yield, white solid, m.p. 145.5–147.1°C

<sup>1</sup>H NMR (300 MHz, CDCl<sub>3</sub>) δ 8.07 (d, *J* = 8.9 Hz, 2H), 7.33 (d, *J* = 8.9 Hz, 1H), 7.30–7.22 (m, 3H), 7.10–7.05 (m, 2H), 6.25 (s, 1H), 4.61 (br s, 1H), 3.25 (br q, *J* = 6.3 Hz, 2H), 2.64 (t, *J* = 7.5 Hz, 2H), 1.95 (pent, *J* = 7.0 Hz, 2H), 1.45 (s, 9H)

<sup>13</sup>C NMR (75 MHz, CDCl<sub>3</sub>) δ 164.11, 162.36, 155.93, 154.17, 146.75, 141.04, 136.47, 131.91, 129.33, 128.60, 128.47, 122.98, 119.88, 106.80, 79.30, 39.58, 31.00, 28.29, 27.39

IR (UATR)  $\nu_{\max}$  3359, 2976, 1702, 1637, 1516, 1344, 1247, 1165, 949, 852, 768, 700 cm<sup>-1</sup>

HRMS (ESI<sup>+</sup>) calcd for C<sub>25</sub>H<sub>27</sub>N<sub>2</sub>O<sub>6</sub> (M+H)<sup>+</sup> 451.1864, found 451.1869.

#### **6-(3-Aminopropyl)-3-(4-nitrophenyl)-4-phenyl-2H-pyran-2-one hydrochloride (deBoc-10a)**

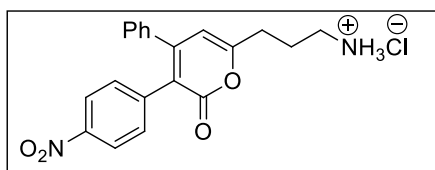

$^1\text{H}$  NMR (300 MHz,  $\text{CDCl}_3+\text{CD}_3\text{OD}$ )  $\delta$  8.07 (d,  $J = 8.9$  Hz, 2H), 7.32 (d,  $J = 8.9$  Hz, 1H), 7.33–7.22 (m, 3H), 7.10–7.05 (m, 2H), 6.38 (s, 1H), 3.11 (t,  $J = 7.1$  Hz, 2H), 2.80 (t,  $J = 7.4$  Hz, 2H), 2.24 (pent,  $J = 7.0$  Hz, 2H)

$^{13}\text{C}$  NMR (75 MHz,  $\text{CDCl}_3+\text{CD}_3\text{OD}$ )  $\delta$  162.79, 162.51, 154.64, 146.69, 140.69, 135.99, 131.76, 129.38, 128.50, 128.37, 122.89, 120.05, 107.50, 38.68, 30.39, 24.35

IR (UATR)  $\nu_{\text{max}}$  3392, 2924, 1702, 1635, 1598, 1519, 1346, 1109, 946, 853, 771, 699  $\text{cm}^{-1}$

HRMS (ESI $^+$ ) calcd for  $\text{C}_{20}\text{H}_{19}\text{N}_2\text{O}_4$  (M+H) $^+$  351.1339, found 351.1339.

### **5-(4-Nitrophenyl)-6-phenyl-2,3-dihydro-1H-pyrrolizine (11a)**

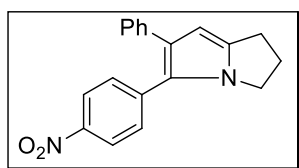

up to 12% yield, brown foam

$^1\text{H}$  NMR (300 MHz,  $\text{CDCl}_3$ )  $\delta$  8.05 (d,  $J = 9.0$  Hz, 2H), 7.30 (d,  $J = 9.0$  Hz, 2H), 7.20–7.10 (m, 5H), 6.02 (s, 1H), 3.98 (t,  $J = 7.0$  Hz, 2H), 2.90 (t,  $J = 7.2$  Hz, 2H), 2.49 (tt,  $J = 7.2, 7.0$  Hz, 2H)

$^{13}\text{C}$  NMR (75 MHz,  $\text{CDCl}_3$ )  $\delta$  145.51, 139.90, 139.83, 136.59, 129.65, 128.74, 128.54, 128.50, 126.13, 123.82, 122.64, 102.30, 46.82, 27.47, 24.50

IR (UATR)  $\nu_{\text{max}}$  2923, 1592, 1513, 1340, 1325, 1109, 852, 761, 703  $\text{cm}^{-1}$

HRMS (ESI $^+$ ) calcd for  $\text{C}_{19}\text{H}_{17}\text{N}_2\text{O}_2$  (M+H) $^+$  305.1285, found 305.1295.

## **5. General procedure for the synthesis of amidine 5c and bicyclic 2-pyridones 5/7**

### **5.1 General procedure for the synthesis of amidine 5c**

In a round-bottomed flask, a solution of Michael products **3** (0.2 mmol) in ethanol (3 mL) was added trimethylsilyl chloride (5 equiv.) at room temperature and then, the mixture was heated at 55  $^{\circ}\text{C}$  for 1.5 h. The reaction was cooled down to room temperature and concentrated under reduced pressure. Then, the mixture was added  $\text{CH}_2\text{Cl}_2$  (10 mL), silica gel (3 g) and stirred at room temperature for 3 h. After that, the solid suspension was filtered out through a paper pad and successively washed with a solvent mixture of 10% methanol in  $\text{CH}_2\text{Cl}_2$ . The combined filtrate was concentrated under reduced pressure. The obtained solid was purified by column chromatography on silica gel using hexanes and an increasing proportion of EtOAc as eluents to afford **5c**.

### **5.2 General procedure for the synthesis of bicyclic 2-pyridones 5/7**

In a pressure tube, a solution of compound **3** (0.2 mmol) in ethylene glycol (3 mL) was added trimethylsilyl chloride (5 equiv.) at room temperature and heated at 55 $^{\circ}\text{C}$  for 1.5 h. Then, the reaction was cooled down to room temperature, 30% aq. KOH solution (3 mL) was added dropwise and the mixture was heated at 190 $^{\circ}\text{C}$  for 2 h. The reaction was cooled down under ice-bath, diluted

with water and extracted with EtOAc. The combined organic part was washed successively with water, dried over Na<sub>2</sub>SO<sub>4</sub>, and the solvent was concentrate under reduced pressure. The obtained solid was purified by the combined techniques of crystallization from EtOAc and column chromatography on silica gel using hexanes and EtOAc as eluents to afford the desired 2-pyridones.

Note: Only intermediate **4c**, from Michael adduct **3c**, was characterized.

### **7-Cyano-4-oxo-6,7-diphenylhept-6-enylammonium chloride (4c)**

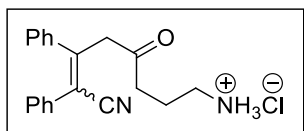

Quantitative yield, yellow solid, m.p. 157.2–158.9°C

<sup>1</sup>H NMR (300 MHz, CDCl<sub>3</sub>) δ (isomeric ratio 58:42) 8.20 (br s, 3H), 7.70–7.00 (m, 20H), 4.06 (br s, 2H), 3.70, (br s, 2H), 2.98 (br s, 2H), 2.86 (br s, 2H), 2.74 (br s, 2H), 2.43 (br s, 2H), 2.02 (br s, 2H), 1.87 (br s, 2H)

<sup>13</sup>C NMR (75 MHz, CDCl<sub>3</sub>) δ (isomeric ratio 58:42) 205.05, 204.18, 152.58, 151.44, 138.86, 137.75, 133.90, 133.05, 129.31, 129.17, 129.08, 129.01, 128.77, 128.65, 128.47, 128.40, 128.34, 128.22, 127.90, 127.86, 118.68, 118.64, 115.28, 115.13, 52.08, 48.44, 39.86, 39.76, 39.00, 38.94, 21.21, 21.09

IR (UATR)  $\nu_{\max}$  3392, 2923, 2213, 1716, 1602, 1493, 1445, 1310, 1074, 763, 734, 697 cm<sup>-1</sup>

HRMS (ESI<sup>+</sup>) calcd for C<sub>20</sub>H<sub>21</sub>N<sub>2</sub>O<sub>1</sub> (M+H)<sup>+</sup> 305.1648, found 305.1642.

### **6-(4-Nitrophenyl)-7-phenyl-2,3-dihydroindolizin-5(1H)-one (5a)**

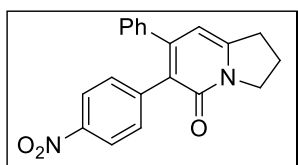

85% yield, yellow solid, m.p. 200.8–202.0°C

<sup>1</sup>H NMR (300 MHz, CDCl<sub>3</sub>) δ 8.03 (d, *J* = 8.9 Hz, 2H), 7.32 (d, *J* = 8.9 Hz, 2H), 7.25–7.19 (m, 3H), 7.08–7.03 (m, 2H), 6.29 (s, 1H), 4.25 (t, *J* = 7.3 Hz, 2H), 3.19 (t, *J* = 7.7 Hz, 2H), 2.29 (tt, *J* = 7.7, 7.3 Hz, 2H)

<sup>13</sup>C NMR (75 MHz, CDCl<sub>3</sub>) δ 160.61, 151.88, 149.98, 146.22, 143.34, 138.99, 132.28, 128.79, 128.32, 128.12, 124.22, 122.68, 103.96, 49.28, 31.99, 21.32

IR (UATR)  $\nu_{\max}$  3058, 2928, 1643, 1597, 1513, 1342, 852, 770, 707 cm<sup>-1</sup>

HRMS (ESI<sup>+</sup>) calcd for C<sub>20</sub>H<sub>17</sub>N<sub>2</sub>O<sub>3</sub> (M+H)<sup>+</sup> 333.1234, found 333.1237.

### **6,7-Diphenyl-2,3-dihydroindolizin-5(1H)-one (5b)**

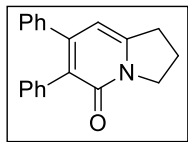

81% yield, white solid, m.p. 213.3–213.7°C

$^1\text{H}$  NMR (300 MHz,  $\text{CDCl}_3$ )  $\delta$  7.20–7.05 (m, 10H), 6.24 (s, 1H), 4.23 (t,  $J = 7.2$  Hz, 2H), 3.15 (t,  $J = 7.8$  Hz, 2H), 2.25 (tt,  $J = 7.8, 7.2$  Hz, 2H)

$^{13}\text{C}$  NMR (75 MHz,  $\text{CDCl}_3$ )  $\delta$  161.32, 150.62, 148.32, 139.85, 135.65, 131.18, 128.86, 127.81, 127.43, 127.35, 126.60, 126.48, 103.71, 49.07, 31.76, 21.34

IR (UATR)  $\nu_{\text{max}}$  2924, 1643, 1582, 1528, 1440, 1234, 1071, 700  $\text{cm}^{-1}$

HRMS ( $\text{ESI}^+$ ) calcd for  $\text{C}_{20}\text{H}_{18}\text{N}_1\text{O}_1$  ( $\text{M}+\text{H}$ ) $^+$  288.1383, found 288.1376.

### **6,7-Diphenyl-2,3-dihydroindolizin-5(1H)-imine (5c)**

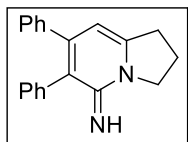

Yellow solid, m.p. 201.7–203.5°C;

$^1\text{H}$  NMR (300 MHz,  $\text{CDCl}_3$ )  $\delta$  7.30–7.00 (m, 10H), 5.86 (s, 1H), 4.12 (t,  $J = 7.2$  Hz, 2H), 3.04 (t,  $J = 7.7$  Hz, 2H), 2.24 (tt,  $J = 7.7, 7.2$  Hz, 2H)

$^{13}\text{C}$  NMR (75 MHz,  $\text{CDCl}_3$ )  $\delta$  159.59, 148.14, 145.67, 140.24, 136.41, 130.97, 128.65, 128.59, 127.68, 127.15, 127.01, 125.11, 100.02, 49.76, 31.33, 21.34

IR (UATR)  $\nu_{\text{max}}$  3327, 1636, 1557, 1516, 1239, 1014, 768, 700  $\text{cm}^{-1}$

HRMS ( $\text{ESI}^+$ ) calcd for  $\text{C}_{20}\text{H}_{19}\text{N}_2$  ( $\text{M}+\text{H}$ ) $^+$  287.1543, found 287.1557.

### **6-(3,4-Dimethoxyphenyl)-7-phenyl-2,3-dihydroindolizin-5(1H)-one (5d)**

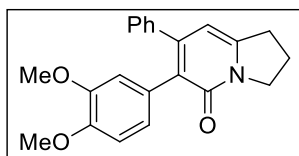

65% yield, white solid, m.p. 145.1–146.0°C

$^1\text{H}$  NMR (300 MHz,  $\text{CDCl}_3$ )  $\delta$  7.20–7.07 (m, 5H), 6.78 (dd,  $J = 8.3, 1.9$  Hz, 1H), 6.70 (d,  $J = 8.3$  Hz, 1H), 6.62 (d,  $J = 1.9$  Hz, 1H), 6.24 (s, 1H), 4.23 (t,  $J = 7.2$  Hz, 2H), 3.81 (s, 3H), 3.60 (s, 3H), 3.14 (t,  $J = 7.6$  Hz, 2H), 2.24 (tt,  $J = 7.6, 7.2$  Hz, 2H)

$^{13}\text{C}$  NMR (75 MHz,  $\text{CDCl}_3$ )  $\delta$  161.42, 150.44, 148.00, 147.85, 147.57, 140.16, 128.73, 127.97, 127.92, 127.28, 126.13, 123.89, 114.75, 110.39, 103.77, 55.60, 55.49, 49.10, 31.73, 21.38

IR (UATR)  $\nu_{\text{max}}$  2935, 1638, 1579, 1526, 1464, 1249, 1026, 727  $\text{cm}^{-1}$

HRMS (ESI<sup>+</sup>) calcd for C<sub>22</sub>H<sub>22</sub>N<sub>1</sub>O<sub>3</sub> (M+H)<sup>+</sup> 348.1594, found 348.1607.

**6-(4-Chlorophenyl)-7-phenyl-2,3-dihydroindolizin-5(1H)-one (5e)**

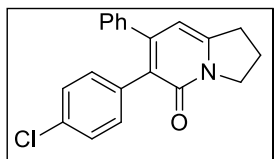

78% yield, white solid, m.p. 231.0–231.9°C

<sup>1</sup>H NMR (300 MHz, CDCl<sub>3</sub>) δ 7.23–7.05 (m, 9H), 6.24 (s, 1H), 4.22 (t, *J* = 7.2 Hz, 2H), 3.15 (t, *J* = 7.6 Hz, 2H), 2.25 (tt, *J* = 7.6, 7.2 Hz, 2H)

<sup>13</sup>C NMR (75 MHz, CDCl<sub>3</sub>) δ 161.14, 150.90, 148.74, 139.60, 134.22, 132.64, 132.38, 128.86, 128.09, 127.75, 127.64, 125.32, 103.77, 49.15, 31.86, 21.39

IR (UATR)  $\nu_{\max}$  3053, 2927, 1640, 1582, 1525, 1088, 845, 700 cm<sup>-1</sup>

HRMS (ESI<sup>+</sup>) calcd for C<sub>20</sub>H<sub>17</sub>Cl<sub>1</sub>N<sub>1</sub>O<sub>1</sub> (M+H)<sup>+</sup> 322.0993, found 322.0989.

**6-(4-Aminophenyl)-7-phenyl-2,3-dihydroindolizin-5(1H)-one (5f)**

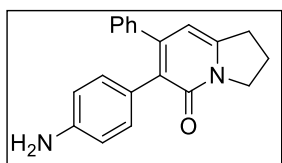

59% yield, brown solid, m.p. 275.0–276.2°C;

<sup>1</sup>H NMR (300 MHz, CDCl<sub>3</sub>) δ 7.24–7.08 (m, 5H), 6.92 (d, *J* = 8.4 Hz, 2H), 6.49 (d, *J* = 8.4 Hz, 2H), 6.20 (s, 1H), 4.21 (t, *J* = 7.3 Hz, 2H), 3.53 (br s, 2H), 3.12 (t, *J* = 7.7 Hz, 2H), 2.23 (tt, *J* = 7.7, 7.3 Hz, 2H)

<sup>13</sup>C NMR (75 MHz, CDCl<sub>3</sub>) δ 161.74, 149.86, 147.49, 144.89, 140.42, 132.19, 128.96, 127.89, 127.17, 126.68, 125.72, 114.48, 103.73, 49.06, 31.76, 21.46

IR (UATR)  $\nu_{\max}$  3402, 3339, 3240, 2958, 1642, 1588, 1533, 1237, 770, 698 cm<sup>-1</sup>

HRMS (ESI<sup>+</sup>) calcd for C<sub>20</sub>H<sub>18</sub>N<sub>2</sub>Na<sub>1</sub>O<sub>1</sub> (M+Na)<sup>+</sup> 325.1311, found 325.1317.

**7-Phenyl-6-(pyridin-3-yl)-2,3-dihydroindolizin-5(1H)-one (5g)**

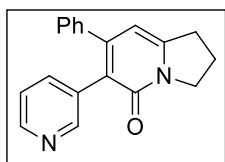

65% yield, yellow solid, m.p. 199.4–200.1°C

<sup>1</sup>H NMR (300 MHz, CDCl<sub>3</sub>) δ 8.36 (dd, *J* = 4.8, 1.6 Hz, 1H), 8.26 (dd, *J* = 2.0, 0.6 Hz, 1H), 7.59 (dt, *J* = 7.9, 1.8 Hz, 1H), 7.25–7.18 (m, 3H), 7.15 (dd, *J* = 7.9, 4.9 Hz, 1H), 7.09–7.03 (m, 2H), 6.28 (s, 1H), 4.24 (t, *J* = 7.2 Hz, 2H), 3.18 (t, *J* = 8.0 Hz, 2H), 2.28 (tt, *J* = 7.6, 7.2 Hz, 2H)



$^{13}\text{C}$  NMR (75 MHz,  $\text{CDCl}_3$ )  $\delta$  161.16, 151.87, 151.76, 149.38, 147.46, 139.21, 138.71, 131.82, 128.95, 128.27, 127.95, 123.01, 122.47, 103.92, 49.23, 31.95, 21.420

IR (UATR)  $\nu_{\text{max}}$  2929, 1637, 1592, 1373, 1239, 1023, 768  $\text{cm}^{-1}$

HRMS ( $\text{ESI}^+$ ) calcd for  $\text{C}_{19}\text{H}_{17}\text{N}_2\text{O}_1$  ( $\text{M}+\text{H}$ ) $^+$  289.1335, found 289.1334.

### **7-Phenyl-6-(thiophen-2-yl)-2,3-dihydroindolizin-5(1H)-one (5h)**

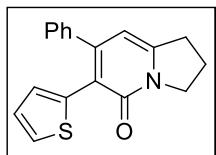

78% yield, white solid, m.p. 172.2–172.9°C

$^1\text{H}$  NMR (300 MHz,  $\text{CDCl}_3$ )  $\delta$  7.33–7.18 (m, 6H), 6.78 (dd,  $J = 5.1, 3.7$  Hz, 1H), 6.65 (dd,  $J = 3.7, 1.1$  Hz, 1H), 6.20 (s, 1H), 4.26 (t,  $J = 7.2$  Hz, 2H), 3.15 (t,  $J = 7.6$  Hz, 2H), 2.26 (tt,  $J = 7.6, 7.2$  Hz, 2H)

$^{13}\text{C}$  NMR (75 MHz,  $\text{CDCl}_3$ )  $\delta$  160.62, 150.71, 147.89, 140.57, 136.38, 129.03, 128.36, 128.35, 127.81, 125.99, 125.54, 119.62, 104.31, 49.31, 31.80, 21.38

IR (UATR)  $\nu_{\text{max}}$  2925, 1637, 1588, 1228, 768, 698  $\text{cm}^{-1}$

HRMS ( $\text{ESI}^+$ ) calcd for  $\text{C}_{18}\text{H}_{16}\text{N}_1\text{O}_1\text{S}_1$  ( $\text{M}+\text{H}$ ) $^+$  294.0947, found 294.0950

### **6-(Naphthalen-2-yl)-7-phenyl-2,3-dihydroindolizin-5(1H)-one (5i)**

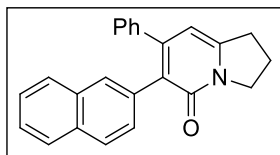

85% yield, white solid, m.p. 175.4–176.1°C

$^1\text{H}$  NMR (300 MHz,  $\text{CDCl}_3$ )  $\delta$  7.74–7.62 (m, 3H), 7.60 (d,  $J = 8.5$  Hz, 1H), 7.41–7.31 (m, 2H), 7.19 (dd,  $J = 8.5, 1.6$  Hz, 1H), 7.15–7.06 (m, 5H), 6.28 (s, 1H), 4.25 (t,  $J = 7.2$  Hz, 2H), 3.17 (t,  $J = 7.6$  Hz, 2H), 2.26 (tt,  $J = 7.6, 7.2$  Hz, 2H)

$^{13}\text{C}$  NMR (75 MHz,  $\text{CDCl}_3$ )  $\delta$  161.49, 150.91, 148.49, 139.85, 133.25, 133.12, 132.23, 130.49, 129.34, 128.93, 128.02, 127.98, 127.47, 127.37, 126.77, 126.39, 125.49, 125.29, 103.88, 49.15, 31.85, 21.41

IR (UATR)  $\nu_{\text{max}}$  3053, 1637, 1577, 1525, 1437, 1221, 830, 744  $\text{cm}^{-1}$

HRMS ( $\text{ESI}^+$ ) calcd for  $\text{C}_{24}\text{H}_{20}\text{N}_1\text{O}_1$  ( $\text{M}+\text{H}$ ) $^+$  338.1539, found 338.1547.

### **7-(3,4-Dimethoxyphenyl)-6-phenyl-2,3-dihydroindolizin-5(1H)-one (5j)**

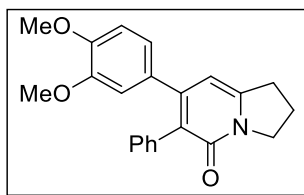

78% yield, white solid, m.p. 127.0–127.9°C

$^1\text{H}$  NMR (300 MHz,  $\text{CDCl}_3$ )  $\delta$  7.25–7.09 (m, 5H), 6.81 (dd,  $J = 8.3, 2.0$  Hz, 1H), 6.75 (d,  $J = 8.3$  Hz, 1H), 6.44 (d,  $J = 2.0$  Hz, 1H), 6.28 (s, 1H), 4.22 (t,  $J = 7.2$  Hz, 2H), 3.84 (s, 3H), 3.47 (s, 3H), 3.16 (t,  $J = 7.6$  Hz, 2H), 2.25 (tt,  $J = 7.6, 7.2$  Hz, 2H)

$^{13}\text{C}$  NMR (75 MHz,  $\text{CDCl}_3$ )  $\delta$  161.35, 150.00, 148.35, 148.28, 147.88, 136.19, 132.07, 131.06, 127.68, 126.44, 126.13, 121.17, 112.96, 110.43, 103.47, 55.63, 55.40, 48.99, 31.75, 21.36

IR (UATR)  $\nu_{\text{max}}$  2935, 1639, 1590, 1514, 1257, 1137, 1024, 807, 746, 700  $\text{cm}^{-1}$

HRMS (ESI $^+$ ) calcd for  $\text{C}_{22}\text{H}_{21}\text{N}_1\text{Na}_1\text{O}_3$  (M+Na) $^+$  370.1414, found 370.1404

### **7-(4-Chlorophenyl)-6-phenyl-2,3-dihydroindolizin-5(1H)-one (5k)**

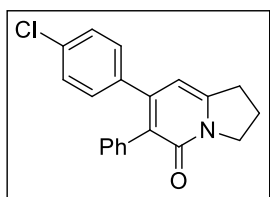

73% yield, white solid, m.p. 255.0–256.0°C

$^1\text{H}$  NMR (300 MHz,  $\text{CDCl}_3$ )  $\delta$  7.23–7.09 (m, 7H), 7.00 (d,  $J = 8.6$  Hz, 2H), 6.19 (s, 1H), 4.20 (t,  $J = 7.2$  Hz, 2H), 3.13 (t,  $J = 7.6$  Hz, 2H), 2.23 (tt,  $J = 7.6, 7.2$  Hz, 2H)

$^{13}\text{C}$  NMR (75 MHz,  $\text{CDCl}_3$ )  $\delta$  161.20, 149.22, 148.61, 138.32, 135.37, 133.41, 131.12, 130.25, 128.11, 127.66, 127.72, 103.25, 49.11, 31.81, 21.36

IR (UATR)  $\nu_{\text{max}}$  2927, 1640, 1577, 1492, 1239, 1090, 830, 700  $\text{cm}^{-1}$

HRMS (ESI $^+$ ) calcd for  $\text{C}_{20}\text{H}_{17}\text{Cl}_1\text{N}_1\text{O}_1$  (M+H) $^+$  322.0993, found 322.1001.

### **7-(4-Aminophenyl)-6-phenyl-2,3-dihydroindolizin-5(1H)-one (5l)**

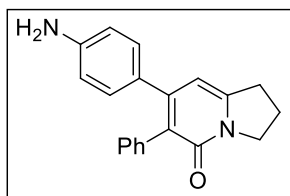

65% yield, yellow solid, m.p. 233.4–234.4°C

$^1\text{H}$  NMR (300 MHz,  $\text{CDCl}_3$ )  $\delta$  7.24–7.11 (m, 5H), 6.87 (d,  $J = 8.4$  Hz, 2H), 6.47 (d,  $J = 8.4$  Hz, 2H), 6.24 (s, 1H), 4.20 (t,  $J = 7.2$  Hz, 2H), 3.71 (br s, 2H), 3.13 (t,  $J = 7.6$  Hz, 2H), 2.24 (tt,  $J = 7.6, 7.2$  Hz, 2H)

$^{13}\text{C}$  NMR (75 MHz,  $\text{CDCl}_3$ )  $\delta$  161.53, 150.59, 148.00, 145.88, 136.33, 131.31, 130.25, 129.74, 127.58, 126.34, 125.85, 114.37, 103.82, 49.01, 31.79, 21.44

IR (UATR)  $\nu_{\text{max}}$  3411, 3340, 3233, 2927, 1634, 1609, 1570, 1521, 1307, 823, 700  $\text{cm}^{-1}$

HRMS ( $\text{ESI}^+$ ) calcd for  $\text{C}_{20}\text{H}_{18}\text{N}_2\text{Na}_1\text{O}_1$  ( $\text{M}+\text{Na}$ ) $^+$  325.1311, found 325.1322.

### **6-Phenyl-7-(pyridin-3-yl)-2,3-dihydroindolizin-5(1H)-one (5m)**

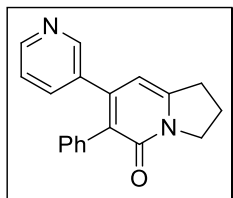

68% yield, yellow solid, m.p. 220.5–221.5°C

$^1\text{H}$  NMR (300 MHz,  $\text{CDCl}_3$ )  $\delta$  8.42 (dd,  $J = 4.9, 1.5$  Hz, 1H), 8.40 (d,  $J = 2.0$  Hz, 1H), 7.31 (dt,  $J = 7.9, 2.0$  Hz, 1H), 7.23–7.10 (m, 5H), 7.08 (dd,  $J = 7.9, 4.9$  Hz, 1H), 6.22 (s, 1H), 4.24 (t,  $J = 7.3$  Hz, 2H), 3.18 (t,  $J = 7.6$  Hz, 2H), 2.27 (tt,  $J = 7.6, 7.3$  Hz, 2H)

$^{13}\text{C}$  NMR (75 MHz,  $\text{CDCl}_3$ )  $\delta$  161.13, 149.41, 149.04, 148.55, 146.92, 136.30, 135.68, 134.92, 131.21, 127.81, 127.53, 127.02, 122.64, 102.96, 49.21, 31.90, 21.38

IR (UATR)  $\nu_{\text{max}}$  3030, 1638, 1578, 1527, 1439, 1371, 1231, 1023, 791, 705  $\text{cm}^{-1}$

HRMS ( $\text{ESI}^+$ ) calcd for  $\text{C}_{19}\text{H}_{17}\text{N}_2\text{O}_1$  ( $\text{M}+\text{H}$ ) $^+$  289.1335, found 289.1346

### **6-Phenyl-7-(thiophen-2-yl)-2,3-dihydroindolizin-5(1H)-one (5n)**

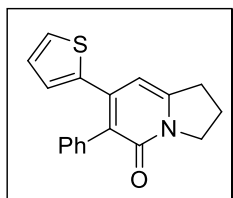

80% yield, white solid, m.p. 222.0–223.0°C

$^1\text{H}$  NMR (300 MHz,  $\text{CDCl}_3$ )  $\delta$  7.30–7.15 (m, 5H), 7.08 (dd,  $J = 5.0, 3.0$  Hz, 1H), 7.02 (dd,  $J = 3.0, 1.2$  Hz, 1H), 6.65 (dd,  $J = 5.0, 1.2$  Hz, 1H), 6.31 (s, 1H), 4.20 (t,  $J = 7.2$  Hz, 2H), 3.14 (t,  $J = 7.6$  Hz, 2H), 2.24 (tt,  $J = 7.6, 7.2$  Hz, 2H)

$^{13}\text{C}$  NMR (75 MHz,  $\text{CDCl}_3$ )  $\delta$  161.44, 148.36, 144.76, 140.13, 136.21, 130.82, 128.27, 127.85, 126.90, 126.39, 124.81, 124.73, 103.03, 49.03, 31.80, 21.42

IR (UATR)  $\nu_{\text{max}}$  2925, 1644, 1606, 1238, 1082, 781, 701  $\text{cm}^{-1}$

HRMS ( $\text{ESI}^+$ ) calcd for  $\text{C}_{18}\text{H}_{16}\text{N}_1\text{O}_1\text{S}_1$  ( $\text{M}+\text{H}$ ) $^+$  294.0947, found 294.0953.

### **7-(*n*-Butyl)-6-phenyl-2,3-dihydroindolizin-5(*IH*)-one (5o)**

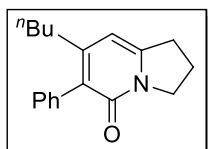

66% yield, white solid, m.p. 121.0–122.7°C

$^1\text{H}$  NMR (300 MHz,  $\text{CDCl}_3$ )  $\delta$  7.43–7.18 (m, 5H), 6.11 (s, 1H), 4.12 (t,  $J = 7.2$  Hz, 2H), 3.06 (t,  $J = 7.7$  Hz, 2H), 2.30 (dd,  $J = 8.0, 7.6$  Hz, 2H), 2.16 (tt,  $J = 7.7, 7.2$  Hz, 2H), 1.49–1.36 (m, 2H), 1.19 (sext,  $J = 7.3$  Hz, 2H), 0.77 (t,  $J = 7.3$  Hz, 3H)

$^{13}\text{C}$  NMR (75 MHz,  $\text{CDCl}_3$ )  $\delta$  161.29, 152.15, 147.80, 136.18, 130.13, 127.88, 127.58, 126.75, 102.69, 48.71, 32.97, 32.03, 31.48, 22.26, 21.27, 13.58

IR (UATR)  $\nu_{\text{max}}$  2957, 1645, 1575, 1441, 1268, 1088, 700  $\text{cm}^{-1}$

HRMS ( $\text{ESI}^+$ ) calcd for  $\text{C}_{18}\text{H}_{22}\text{N}_1\text{O}_1$  ( $\text{M}+\text{H}$ ) $^+$  268.1696, found 268.1702.

### **7-(3,4-Dimethoxyphenyl)-6-(4-methoxyphenyl)-2,3-dihydroindolizin-5(*IH*)-one (5r)<sup>6</sup>**

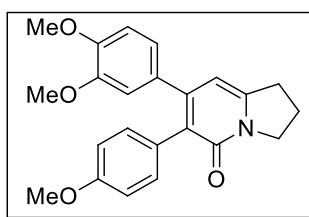

78% yield, white solid, m.p. 146.0–146.4°C

$^1\text{H}$  NMR (300 MHz,  $\text{CDCl}_3$ )  $\delta$  7.08 (d,  $J = 8.7$  Hz, 2H), 6.82–6.72 (m, 4H), 6.49 (d,  $J = 1.6$  Hz, 1H), 6.26 (s, 1H), 4.21 (t,  $J = 7.2$  Hz, 2H), 3.85 (s, 3H), 3.75 (s, 3H), 3.53 (s, 3H), 3.13 (t,  $J = 7.6$  Hz, 2H), 2.24 (tt,  $J = 7.6, 7.2$  Hz, 2H)

$^{13}\text{C}$  NMR (75 MHz,  $\text{CDCl}_3$ )  $\delta$  161.49, 158.09, 149.64, 148.23, 147.92, 147.85, 132.35, 132.12, 128.36, 125.71, 121.18, 113.19, 112.84, 110.45, 103.38, 55.60, 55.42, 55.02, 48.91, 31.67, 21.34

IR (UATR)  $\nu_{\text{max}}$  2927, 1639, 1574, 1511, 1464, 1241, 1025, 807, 732  $\text{cm}^{-1}$

HRMS ( $\text{ESI}^+$ ) calcd for  $\text{C}_{23}\text{H}_{24}\text{N}_1\text{O}_4$  ( $\text{M}+\text{H}$ ) $^+$  378.16998, found 378.1700.

### **(*R*)-Ethyl 6-cyano-5-oxo-7-phenyl-2,3-tetrahydroindolizine-3-carboxylate (5s)**

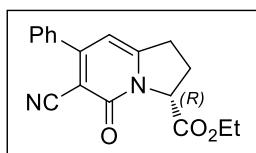

77% yield, brown solid, m.p. 155.0–157.0°C,  $[\alpha]_{28}^{\text{D}} +247.2$  ( $c$  1.1, MeOH), > 99.9 % ee (HPLC)

$^1\text{H}$  NMR (300 MHz,  $\text{CDCl}_3$ )  $\delta$  7.60–7.44 (m, 5H), 6.31 (s, 1H), 5.18 (dd,  $J = 9.6, 3.0$  Hz, 1H), 4.36–4.21 (m, 2H), 3.36–3.15 (m, 2H), 2.68–2.53 (m, 1H), 2.41–2.30 (m, 1H), 1.32 (t,  $J = 7.1$  Hz, 3H)

$^{13}\text{C}$  NMR (75 MHz,  $\text{CDCl}_3$ )  $\delta$  169.20, 161.03, 159.32, 155.28, 135.90, 130.42, 128.77, 127.95, 115.66, 103.10, 99.40, 62.18, 62.06, 31.29, 25.76, 13.97

IR (UATR)  $\nu_{\text{max}}$  2983, 2219, 1742, 1651, 1599, 1518, 1448, 1377, 1196, 1019, 766, 700  $\text{cm}^{-1}$

HRMS ( $\text{ESI}^+$ ) calcd for  $\text{C}_{18}\text{H}_{16}\text{N}_2\text{Na}_1\text{O}_3$  ( $\text{M}+\text{Na}$ ) $^+$  331.1053, found 331.1062.

### **2,3-Diphenyl-6,7,8,9-tetrahydroquinolizin-4-one (7b)**

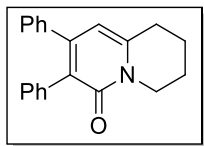

80% yield, white solid, m.p. 188.6–189.3°C

$^1\text{H}$  NMR (300 MHz,  $\text{CDCl}_3$ )  $\delta$  7.22–7.05 (m, 10H), 6.13 (s, 1H), 4.07 (t,  $J = 6.3$  Hz, 2H), 2.85 (t,  $J = 6.6$  Hz, 2H), 2.01 (tt,  $J = 6.6, 6.3$  Hz, 2H), 1.85 (tt,  $J = 6.6, 6.3$  Hz, 2H)

$^{13}\text{C}$  NMR (75 MHz,  $\text{CDCl}_3$ )  $\delta$  162.77, 149.01, 145.57, 139.56, 136.14, 131.19, 128.90, 127.87, 127.51, 127.42, 126.50, 125.89, 107.46, 42.26, 28.91, 22.43, 18.81

IR (UATR)  $\nu_{\text{max}}$  2954, 1634, 1584, 1536, 1444, 1250, 1019, 767, 698  $\text{cm}^{-1}$

HRMS ( $\text{ESI}^+$ ) calcd for  $\text{C}_{21}\text{H}_{20}\text{N}_1\text{O}_1$  ( $\text{M}+\text{H}$ ) $^+$  302.1539, found 302.1530.

### **3-(3,4-Dimethoxyphenyl)-2-phenyl-6,7,8,9-tetrahydroquinolizin-4-one (7d)**

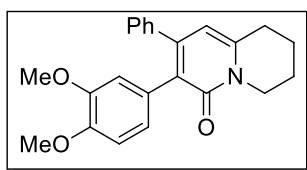

68% yield, white solid, m.p. 158.2–158.9°C

$^1\text{H}$  NMR (300 MHz,  $\text{CDCl}_3$ )  $\delta$  7.22–7.06 (m, 5H), 6.79 (dd,  $J = 8.3, 1.9$  Hz, 1H), 6.71 (d,  $J = 8.3$  Hz, 1H), 6.62 (d,  $J = 1.9$  Hz, 1H), 6.12 (s, 1H), 4.08 (t,  $J = 6.3$  Hz, 2H), 3.82 (s, 3H), 3.60 (s, 3H), 2.85 (t,  $J = 6.6$  Hz, 2H), 2.02 (tt,  $J = 6.6, 6.3$  Hz, 2H), 1.85 (tt,  $J = 6.6, 6.3$  Hz, 2H)

$^{13}\text{C}$  NMR (75 MHz,  $\text{CDCl}_3$ )  $\delta$  162.84, 148.85, 147.95, 147.62, 145.30, 139.91, 128.78, 128.54, 127.98, 127.35, 125.44, 123.90, 114.81, 110.50, 107.44, 55.70, 55.57, 42.27, 28.89, 22.45, 18.83

IR (UATR)  $\nu_{\text{max}}$  2948, 1635, 1575, 1535, 1443, 1260, 1139, 1027, 764, 701  $\text{cm}^{-1}$

HRMS ( $\text{ESI}^+$ ) calcd for  $\text{C}_{23}\text{H}_{23}\text{N}_1\text{Na}_1\text{O}_3$  ( $\text{M}+\text{Na}$ ) $^+$  384.1570, found 384.1567.

### **3-(4-Chlorophenyl)-2-phenyl-6,7,8,9-tetrahydroquinolizin-4-one (7e)**

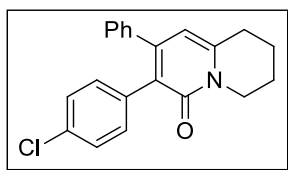

76% yield, white solid, m.p. 218.1–219.2°C

$^1\text{H}$  NMR (300 MHz,  $\text{CDCl}_3$ )  $\delta$  7.21–7.06 (m, 9H), 6.12 (s, 1H), 4.06 (t,  $J = 6.3$  Hz, 2H), 2.85 (t,  $J = 6.5$  Hz, 2H), 2.02 (tt,  $J = 6.5, 6.3$  Hz, 2H), 1.86 (tt,  $J = 6.5, 6.3$  Hz, 2H)

$^{13}\text{C}$  NMR (75 MHz,  $\text{CDCl}_3$ )  $\delta$  162.58, 149.29, 146.01, 139.28, 134.66, 132.63, 132.36, 128.87, 128.11, 127.78, 127.68, 124.54, 107.54, 42.35, 28.96, 22.42, 18.78

IR (UATR)  $\nu_{\text{max}}$  2949, 1634, 1574, 1534, 1253, 1090, 835, 767, 700  $\text{cm}^{-1}$

HRMS ( $\text{ESI}^+$ ) calcd for  $\text{C}_{21}\text{H}_{18}\text{Cl}_1\text{N}_1\text{Na}_1\text{O}_1$  ( $\text{M}+\text{Na}$ ) $^+$  358.0969, found 358.0960.

### **3-(4-Aminophenyl)-2-phenyl-6,7,8,9-tetrahydroquinolizin-4-one (7f)**

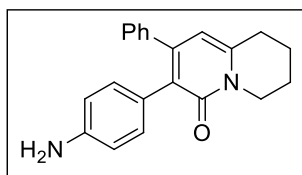

59% yield, brown solid, m.p. 260.0–261.7°C;

$^1\text{H}$  NMR (300 MHz,  $\text{CDCl}_3$ )  $\delta$  7.23–7.08 (m, 5H), 6.93 (d,  $J = 8.2$  Hz, 1H), 6.51 (d,  $J = 8.2$  Hz, 1H), 6.09 (s, 1H), 4.06 (t,  $J = 6.3$  Hz, 2H), 3.49 (br s, 2H), 2.83 (t,  $J = 6.5$  Hz, 2H), 2.00 (tt,  $J = 6.5, 6.3$  Hz, 2H), 1.84 (tt,  $J = 6.5, 6.3$  Hz, 2H)

$^{13}\text{C}$  NMR (75 MHz,  $\text{CDCl}_3$ )  $\delta$  163.15, 148.37, 144.82, 144.77, 140.05, 132.16, 128.96, 127.91, 127.22, 126.24, 125.90, 114.52, 107.55, 42.27, 28.89, 22.50, 18.88

IR (UATR)  $\nu_{\text{max}}$  3342, 3225, 2926, 1634, 1571, 1542, 1252, 1179, 835, 766, 699  $\text{cm}^{-1}$

HRMS ( $\text{ESI}^+$ ) calcd for  $\text{C}_{21}\text{H}_{20}\text{N}_2\text{Na}_1\text{O}_1$  ( $\text{M}+\text{Na}$ ) $^+$  339.1468, found 339.1478.

### **2-Phenyl-3-(pyridin-3-yl)-6,7,8,9-tetrahydroquinolizin-4-one (7g)**

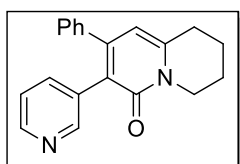

62% yield, yellow solid, m.p. 179.1–180.0°C

$^1\text{H}$  NMR (300 MHz,  $\text{CDCl}_3$ )  $\delta$  8.36 (dd,  $J = 4.9, 1.6$  Hz, 1H), 8.27 (dd,  $J = 2.0, 0.6$  Hz, 1H), 7.60 (dt,  $J = 7.9, 2.0$  Hz, 1H), 7.24–7.18 (m, 3H), 7.13 (dd,  $J = 7.9, 4.9$  Hz, 1H), 7.11–7.03 (m, 2H), 6.16 (s, 1H), 4.08 (t,  $J = 6.3$  Hz, 2H), 2.88 (t,  $J = 6.6$  Hz, 2H), 2.04 (tt,  $J = 6.6, 6.3$  Hz, 2H), 1.87 (tt,  $J = 6.6, 6.3$  Hz, 2H)

$^{13}\text{C}$  NMR (75 MHz,  $\text{CDCl}_3$ )  $\delta$  162.56, 151.83, 150.11, 147.39, 146.64, 138.86, 138.70, 132.21, 128.92(2C), 128.24(2C), 127.94, 122.46, 122.12, 107.67, 42.40, 28.98, 22.36, 18.71

IR (UATR)  $\nu_{\text{max}}$  2929, 1633, 1576, 1538, 1256, 1123, 798, 701  $\text{cm}^{-1}$

HRMS ( $\text{ESI}^+$ ) calcd for  $\text{C}_{20}\text{H}_{19}\text{N}_2\text{O}_1$  ( $\text{M}+\text{H}$ ) $^+$  303.1492, found 303.1506.

### **2-Phenyl-3-(thiophen-2-yl)-6,7,8,9-tetrahydroquinolizin-4-one (7h)**

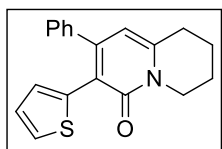

79% yield, white solid, m.p. 165.4–166.1°C

$^1\text{H}$  NMR (300 MHz,  $\text{CDCl}_3$ )  $\delta$  7.33–7.18 (m, 6H), 6.76 (dd,  $J = 5.1, 3.7$  Hz, 1H), 6.61 (dd,  $J = 3.7, 1.1$  Hz, 1H), 6.07 (s, 1H), 4.09 (t,  $J = 6.3$  Hz, 2H), 2.83 (t,  $J = 6.6$  Hz, 2H), 2.00 (tt,  $J = 6.6, 6.3$  Hz, 2H), 1.83 (tt,  $J = 6.6, 6.3$  Hz, 2H)

$^{13}\text{C}$  NMR (75 MHz,  $\text{CDCl}_3$ )  $\delta$  161.96, 149.02, 145.15, 140.22, 136.71, 128.85, 128.30, 128.28, 127.76, 125.85, 125.41, 118.68, 108.12, 42.53, 28.77, 22.36, 18.69

IR (UATR)  $\nu_{\text{max}}$  2947, 1630, 1580, 1574, 1442, 1244, 844, 763, 699  $\text{cm}^{-1}$

HRMS ( $\text{ESI}^+$ ) calcd for  $\text{C}_{19}\text{H}_{18}\text{N}_1\text{O}_1\text{S}_1$  ( $\text{M}+\text{H}^+$ ) 308.1104, found 308.1115.

### **3-(Naphthalen-2-yl)-2-phenyl-6,7,8,9-tetrahydroquinolizin-4-one (7i)**

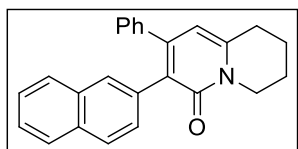

81% yield, white solid, m.p. 157.2–157.9°C

$^1\text{H}$  NMR (300 MHz,  $\text{CDCl}_3$ )  $\delta$  7.75–7.62 (m, 3H), 7.63 (d,  $J = 8.5$  Hz, 1H), 7.41–7.31 (m, 2H), 7.24 (dd,  $J = 8.5, 1.7$  Hz, 1H), 7.15–7.08 (m, 5H), 6.16 (s, 1H), 4.09 (t,  $J = 6.3$  Hz, 2H), 2.86 (t,  $J = 6.6$  Hz, 2H), 2.02 (tt,  $J = 6.6, 6.3$  Hz, 2H), 1.85 (tt,  $J = 6.6, 6.3$  Hz, 2H)

$^{13}\text{C}$  NMR (75 MHz,  $\text{CDCl}_3$ )  $\delta$  162.89, 149.30, 145.74, 139.52, 133.72, 133.17, 132.25, 130.38, 129.38, 128.91, 128.03, 127.98, 127.47, 127.37, 126.78, 125.60, 125.44, 125.25, 107.60, 42.27, 28.93, 22.44, 18.81

IR (UATR)  $\nu_{\text{max}}$  3054, 2948, 1635, 1574, 1538, 1442, 1264, 819, 734, 699  $\text{cm}^{-1}$

HRMS ( $\text{ESI}^+$ ) calcd for  $\text{C}_{25}\text{H}_{22}\text{N}_1\text{O}_1$  ( $\text{M}+\text{H}^+$ ) 352.1696, found 352.1683.

### **2-(3,4-Dimethoxyphenyl)-3-phenyl-6,7,8,9-tetrahydroquinolizin-4-one (7j)**

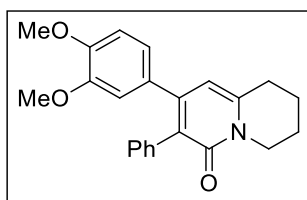

75% yield, white solid, m.p. 122.0–122.7°C

$^1\text{H}$  NMR (300 MHz,  $\text{CDCl}_3$ )  $\delta$  7.25–7.10 (m, 5H), 6.81 (dd,  $J = 8.3, 1.9$  Hz, 1H), 6.71 (d,  $J = 8.3$  Hz, 1H), 6.44 (d,  $J = 1.9$  Hz, 1H), 6.16 (s, 1H), 4.05 (t,  $J = 6.3$  Hz, 2H), 3.82 (s, 3H), 3.46 (s, 3H), 2.84 (t,  $J = 6.6$  Hz, 2H), 1.99 (tt,  $J = 6.6, 6.3$  Hz, 2H), 1.83 (tt,  $J = 6.6, 6.3$  Hz, 2H)

$^{13}\text{C}$  NMR (75 MHz,  $\text{CDCl}_3$ )  $\delta$  162.64, 148.32, 148.27, 147.83, 145.45, 136.57, 131.65, 130.95, 127.60, 126.30, 125.24, 121.07, 112.89, 110.40, 107.10, 55.56, 55.33, 42.03, 28.76, 22.27, 18.67

IR (UATR)  $\nu_{\text{max}}$  2924, 1632, 1577, 1514, 1457, 1261, 1135, 1026, 791, 702  $\text{cm}^{-1}$

HRMS ( $\text{ESI}^+$ ) calcd for  $\text{C}_{23}\text{H}_{24}\text{N}_1\text{O}_3$  ( $\text{M}+\text{H}^+$ ) 362.1751, found 362.1745.

### **2-(4-Chlorophenyl)-3-phenyl-6,7,8,9-tetrahydroquinolizin-4-one (7k)**

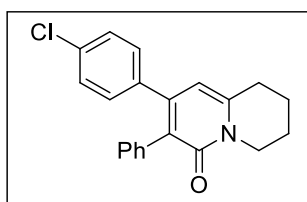

75% yield, white solid, m.p. 212.6–213.5°C

$^1\text{H}$  NMR (300 MHz,  $\text{CDCl}_3$ )  $\delta$  7.24–7.09 (m, 7H), 7.01 (d,  $J = 8.6$  Hz, 2H), 6.07 (s, 1H), 4.06 (t,  $J = 6.3$  Hz, 2H), 2.84 (t,  $J = 6.6$  Hz, 2H), 2.01 (tt,  $J = 6.6, 6.3$  Hz, 2H), 1.85 (tt,  $J = 6.6, 6.3$  Hz, 2H)

$^{13}\text{C}$  NMR (75 MHz,  $\text{CDCl}_3$ )  $\delta$  162.63, 147.64, 145.87, 137.99, 135.82, 133.46, 131.09, 130.25, 128.13, 127.68, 126.69, 125.96, 106.98, 42.27, 28.90, 22.37, 18.75

IR (UATR)  $\nu_{\text{max}}$  2925, 1631, 1568, 1537, 1491, 1248, 1085, 827, 697  $\text{cm}^{-1}$

HRMS ( $\text{ESI}^+$ ) calcd for  $\text{C}_{21}\text{H}_{19}\text{Cl}_1\text{N}_1\text{O}_1$  ( $\text{M}+\text{H}^+$ ) 336.1150, found 336.1146.

### **2-(4-Aminophenyl)-3-phenyl-6,7,8,9-tetrahydroquinolizin-4-one (7l)**

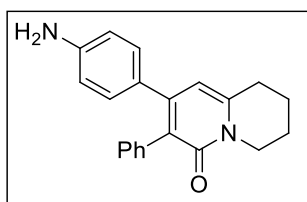

60% yield, yellow solid, m.p. 224.6–225.6°C

$^1\text{H}$  NMR (300 MHz,  $\text{CDCl}_3$ )  $\delta$  7.24–7.11 (m, 5H), 6.88 (d,  $J = 8.6$  Hz, 2H), 6.47 (d,  $J = 8.6$  Hz, 2H), 6.12 (s, 1H), 4.05 (t,  $J = 6.3$  Hz, 2H), 3.67 (br s, 2H), 2.84 (t,  $J = 6.6$  Hz, 2H), 2.00 (tt,  $J = 6.6, 6.3$  Hz, 2H), 1.84 (tt,  $J = 6.6, 6.3$  Hz, 2H)

$^{13}\text{C}$  NMR (75 MHz,  $\text{CDCl}_3$ )  $\delta$  162.89, 148.89, 145.91, 145.20, 136.77, 131.25, 130.21, 129.33, 127.57, 126.27, 125.08, 114.35, 107.55, 42.14, 28.91, 22.48, 18.88

IR (UATR)  $\nu_{\text{max}}$  3337, 3225, 2926, 1636, 1607, 1571, 1524, 1374, 1283, 1182, 820, 735, 699  $\text{cm}^{-1}$

HRMS ( $\text{ESI}^+$ ) calcd for  $\text{C}_{21}\text{H}_{21}\text{N}_2\text{O}_1$  ( $\text{M}+\text{H}^+$ ) 317.1648, found 317.1651.



### **3-Phenyl-2-(pyridin-3-yl)-6,7,8,9-tetrahydroquinolizin-4-one (7m)**

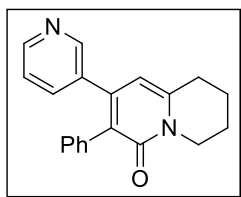

65% yield, yellow solid, m.p. 178.4–179.4°C

$^1\text{H}$  NMR (300 MHz,  $\text{CDCl}_3$ )  $\delta$  8.44 (dd,  $J = 4.9, 1.7$  Hz, 1H), 8.43 (br d,  $J = 1.7$  Hz, 1H), 7.33 (dt,  $J = 8.0, 2.0$  Hz, 1H), 7.26–7.11 (m, 5H), 7.10 (ddd,  $J = 8.0, 4.9, 0.7$  Hz, 1H), 6.13 (s, 1H), 4.10 (t,  $J = 6.3$  Hz, 2H), 2.90 (t,  $J = 6.6$  Hz, 2H), 2.05 (tt,  $J = 6.6, 6.3$  Hz, 2H), 1.89 (tt,  $J = 6.6, 6.3$  Hz, 2H)

$^{13}\text{C}$  NMR (75 MHz,  $\text{CDCl}_3$ )  $\delta$  162.52, 149.41, 148.56, 146.31, 145.35, 136.28, 135.35, 135.32, 131.14, 127.80, 126.94, 126.61, 122.62, 106.65, 42.34, 28.93, 22.33, 18.68

IR (UATR)  $\nu_{\text{max}}$  2949, 1634, 1584, 1535, 1258, 1015, 767, 702  $\text{cm}^{-1}$

HRMS (ESI $^+$ ) calcd for  $\text{C}_{20}\text{H}_{18}\text{N}_2\text{Na}_1\text{O}_1$  ( $\text{M}+\text{Na}$ ) $^+$  325.1311, found 325.1321.

### **3-Phenyl-2-(thiophen-2-yl)-6,7,8,9-tetrahydroquinolizin-4-one (7n)**

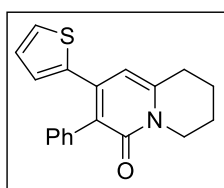

78% yield, white solid, m.p. 189.8–190.5°C

$^1\text{H}$  NMR (300 MHz,  $\text{CDCl}_3$ )  $\delta$  7.30–7.16 (m, 5H), 7.08 (dd,  $J = 5.0, 3.0$  Hz, 1H), 7.03 (dd,  $J = 3.0, 1.3$  Hz, 1H), 6.67 (dd,  $J = 5.0, 1.3$  Hz, 1H), 6.20 (s, 1H), 4.05 (t,  $J = 6.3$  Hz, 2H), 2.85 (t,  $J = 6.5$  Hz, 2H), 2.01 (tt,  $J = 6.5, 6.3$  Hz, 2H), 1.85 (tt,  $J = 6.5, 6.3$  Hz, 2H)

$^{13}\text{C}$  NMR (75 MHz,  $\text{CDCl}_3$ )  $\delta$  162.87, 145.58, 143.17, 139.76, 136.65, 130.75, 128.23, 127.90, 126.87, 125.57, 124.87, 124.74, 106.77, 42.19, 28.91, 22.42, 18.83

IR (UATR)  $\nu_{\text{max}}$  2947, 1634, 1584, 1543, 1254, 1021, 846, 783, 700  $\text{cm}^{-1}$

HRMS (ESI $^+$ ) calcd for  $\text{C}_{19}\text{H}_{18}\text{N}_1\text{O}_1\text{S}_1$  ( $\text{M}+\text{H}$ ) $^+$  308.1104, found 308.1097.

### **2-(*n*-Butyl)-3-phenyl-6,7,8,9-tetrahydroquinolizin-4-one (7o)**

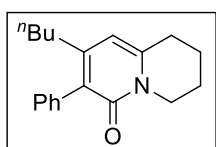

65% yield, white solid, m.p. 104.3–105.0°C

$^1\text{H}$  NMR (300 MHz,  $\text{CDCl}_3$ )  $\delta$  7.43–7.34 (m, 2H), 7.33–7.27 (m, 1H), 7.24–7.18 (m, 2H), 5.97 (s, 1H), 3.99 (t,  $J = 6.3$  Hz, 2H), 2.79 (t,  $J = 6.6$  Hz, 2H), 2.27 (dd,  $J = 8.0, 7.7$  Hz, 2H), 1.96 (pent,  $J =$

6.6 Hz, 2H), 1.82 (pent,  $J = 6.6$  Hz, 2H), 1.48–1.36 (m, 2H), 1.20 (sext,  $J = 7.3$  Hz, 2H), 0.78 (t,  $J = 7.3$  Hz, 3H)

$^{13}\text{C}$  NMR (75 MHz,  $\text{CDCl}_3$ )  $\delta$  162.63, 150.63, 144.94, 136.57, 130.10, 127.93, 127.09, 126.73, 106.63, 41.86, 32.65, 31.96, 28.67, 22.35, 22.31, 18.77, 13.63

IR (UATR)  $\nu_{\text{max}}$  2955, 2869, 1638, 1550, 1443, 1260, 1099, 700  $\text{cm}^{-1}$

HRMS ( $\text{ESI}^+$ ) calcd for  $\text{C}_{19}\text{H}_{24}\text{N}_1\text{O}_1$  ( $\text{M}+\text{H}$ ) $^+$  282.1852, found 282.1857.

### **2-(3,4-Dimethoxyphenyl)-3-(4-methoxyphenyl)-6,7,8,9-tetrahydroquinolizin-4-one (7r)**

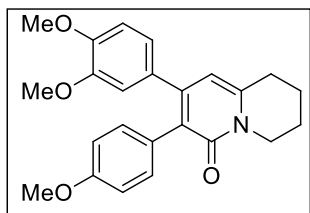

75% yield, white solid, m.p. 144.2–144.9°C

$^1\text{H}$  NMR (300 MHz,  $\text{CDCl}_3$ )  $\delta$  7.08 (d,  $J = 8.7$ , 1.8 Hz, 2H), 6.83–6.72 (m, 4H), 6.49 (d,  $J = 1.8$  Hz, 1H), 6.14 (s, 1H), 4.06 (t,  $J = 6.3$  Hz, 2H), 3.85 (s, 3H), 3.75 (s, 3H), 3.53 (s, 3H), 2.85 (t,  $J = 6.6$  Hz, 2H), 2.01 (tt,  $J = 6.6$ , 6.3 Hz, 2H), 1.85 (tt,  $J = 6.6$ , 6.3 Hz, 2H)

$^{13}\text{C}$  NMR (75 MHz,  $\text{CDCl}_3$ )  $\delta$  163.01, 158.16, 148.34, 148.18, 148.00, 145.16, 132.16, 132.04, 128.85, 125.06, 121.21, 113.30, 112.88, 110.51, 107.25, 55.69, 55.50, 55.13, 42.17, 28.88, 22.42, 18.82

IR (UATR)  $\nu_{\text{max}}$  2949, 1634, 1574, 1509, 1464, 1242, 1139, 1024, 833, 761  $\text{cm}^{-1}$

HRMS ( $\text{ESI}^+$ ) calcd for  $\text{C}_{24}\text{H}_{25}\text{N}_1\text{Na}_1\text{O}_4$  ( $\text{M}+\text{Na}$ ) $^+$  414.1676, found 414.1672.

## **6. Synthesis of ( $\pm$ )-*seco*-antofine (8) and ( $\pm$ )-julandine (9)**

**General procedure for reduction of 2-pyridone:** A solution of 2-pyridone **5r** or **7r** (2.0 mmol) in THF (14 mL) was added slowly to a suspension of  $\text{LiAlH}_4$  (13 equiv.) and  $\text{AlCl}_3$  (10 equiv.) in THF (14 mL) at 0 °C. The reaction was allowed to further stir at room temperature for 20 h. The yellow suspension was quenched with EtOH (1 mL) at 0 °C to destroy the excess reagent and poured onto ice-crashed water. The mixture was basified to pH 12 and extracted with AcOEt. The combined organic layers were washed with water, dried over  $\text{Na}_2\text{SO}_4$ , and the solvent was concentrated under reduced pressure. Crude products were purified by column chromatography on silica gel using AcOEt and an increasing proportion of MeOH as eluents to afford **8** or **9**.

**(±)-seco-Antofine (8)**<sup>7)</sup>

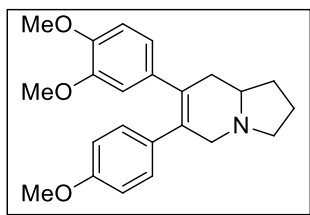

75% yield, yellow foam

<sup>1</sup>H NMR (300 MHz, CDCl<sub>3</sub>) δ 6.98 (d, *J* = 8.8 Hz, 2H), 6.72–6.65 (m, 4H), 6.47 (d, *J* = 0.9 Hz, 1H), 3.88 (d, *J* = 16.0 Hz, 1H), 3.80 (s, 3H), 3.72 (s, 3H), 3.54 (s, 3H), 3.32 (td, *J* = 8.6, 2.1 Hz, 1H), 3.11 (dd, *J* = 16.0, 3.8 Hz, 1H), 2.73 (dd, *J* = 12.9, 2.1 Hz, 1H), 2.53–2.37 (m, 2H), 2.35–2.24 (m, 1H), 2.18–2.04 (m, 1H), 2.00–1.80 (m, 2H), 1.66–1.51 (m 1H)

<sup>13</sup>C NMR (75 MHz, CDCl<sub>3</sub>) δ 157.95, 147.82, 147.13, 134.78, 133.25, 132.51, 132.24, 130.13, 120.60, 113.33, 112.99, 110.38, 60.34, 57.40, 55.60, 55.41, 55.04, 53.95, 37.97, 30.57, 21.38

IR (UATR)  $\nu_{\max}$  2925, 1607, 1510, 1464, 1246, 1169, 1028, 832, 763 cm<sup>-1</sup>

HRMS (ESI<sup>+</sup>) calcd for C<sub>23</sub>H<sub>28</sub>N<sub>1</sub>O<sub>3</sub> (M+H)<sup>+</sup> 366.2064, found 366.2068.

**(±)-Julandine (9)**<sup>7)</sup>

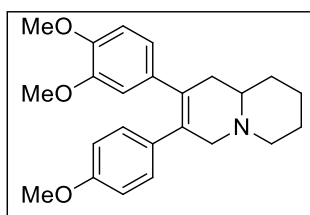

77% yield, yellow foam

<sup>1</sup>H NMR (300 MHz, CDCl<sub>3</sub>) δ 6.98 (d, *J* = 8.8 Hz, 2H), 6.72–6.65 (m, 4H), 6.46 (s, 1H), 3.80 (s, 3H), 3.73 (s, 3H), 3.63 (d, *J* = 16.8 Hz, 1H), 3.53 (s, 3H), 3.16–3.01 (m, 2H), 2.60–2.29 (m, 4H), 2.18–2.07 (m, 1H), 1.90–1.69 (m, 4H), 1.43–1.32 (m, 2H)

<sup>13</sup>C NMR (75 MHz, CDCl<sub>3</sub>) δ 157.99, 147.87, 147.18, 134.44, 133.18, 131.38, 131.25, 130.14, 120.51, 113.38, 112.98, 110.43, 60.32, 57.89, 55.67, 55.52, 55.45, 55.12, 39.48, 33.26, 25.84, 24.32

IR (UATR)  $\nu_{\max}$  2933, 1606, 1509, 1463, 1245, 1169, 1026, 833, 763 cm<sup>-1</sup>

HRMS (ESI<sup>+</sup>) calcd for C<sub>24</sub>H<sub>30</sub>N<sub>1</sub>O<sub>3</sub> (M+H)<sup>+</sup> 380.2220, found 380.2233.

## 7. References

- 1) H.-D. Vu, J. Renault, T. Roisnel, C. Robert, P. Jehan, N. Gouault and P. Uriac, *Eur. J. Org. Chem.*, 2015, 4868.
- 2) S. Minakata, S. Moriwaki, H. Inada, M. Komatsu, H. Kajii, Y. Ohmori, M. Tsumura and K. Namura, *Chem. Lett.* 2007, **36**, 1014.
- 3) K. S. Kim, L. Zhang, R. Schmidt, Z.-W. Cai, D. Wei, D. K. Williams, L. J. Lombardo, G. L. Trainor, D. Xie, Y. Zhang, Y. An, J. S. Sack, J. S. Tokarski, C. Darienzo, A. Kamath, P. Marathe, Y. Zhang, J. Lippy, R. Sr. Jeyaseelan, B. Wautlet, B. Henley, J. Gullo-Brown, V. Manne, J. T. Hunt, J. Fagnoli and R. M. Borzilleri, *J. Med. Chem.* 2008, **51**, 5330.
- 4) T. Traoré, A. Cavagnino, N. Saettel, F. Radvanyi, S. Piguel, I. Bernard-Pierrot, V. Stoven and M. Legraverend, *Eur. J. Med. Chem.*, 2013, **70**, 789.
- 5) N. She, L. Zhuo, W. Jiang, X. Zhu, J. Wang, Z. Ming, X. Zhao, X. Cong and W. Huang, *Bioorg. Med. Chem. Lett.*, 2014, **24**, 3351.
- 6) X. Xu, Y. Liu and C.-M. Park, *Angew. Chem.*, 2012, **124**, 9506; *Angew. Chem. Int. Ed.*, 2012, **51**, 9372.
- 7) C.-F. Chang, C.-F. Li, C.-C. Tsai and T.-H. Chuang, *Org. Lett.*, 2016, **18**, 638.

# 8. $^1\text{H}$ and $^{13}\text{C}$ NMR spectra

$^1\text{H}$  NMR (300 MHz,  $\text{CDCl}_3$ ); **1a**

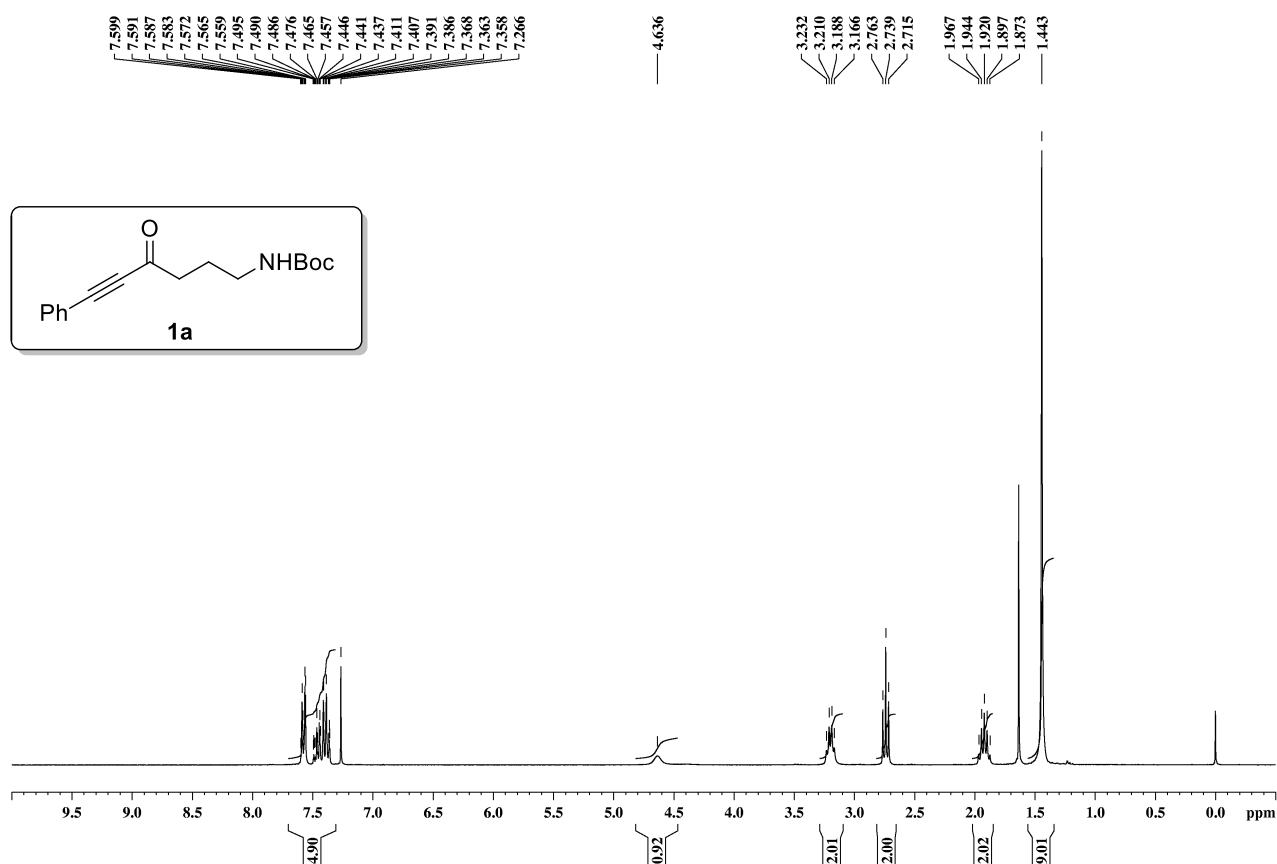

$^{13}\text{C}$  NMR (75 MHz,  $\text{CDCl}_3$ ); **1a**

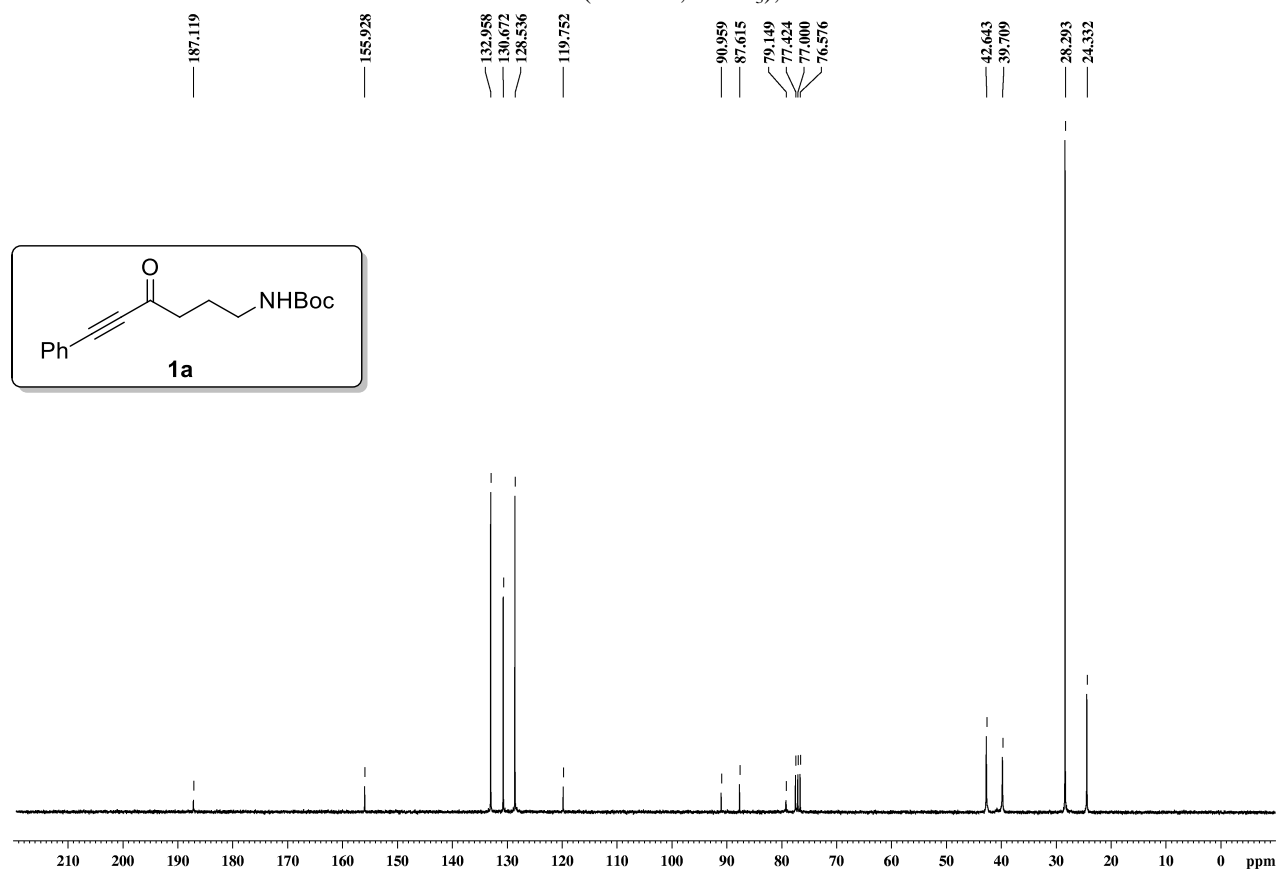

<sup>1</sup>H NMR (300 MHz, CDCl<sub>3</sub>); **1b**

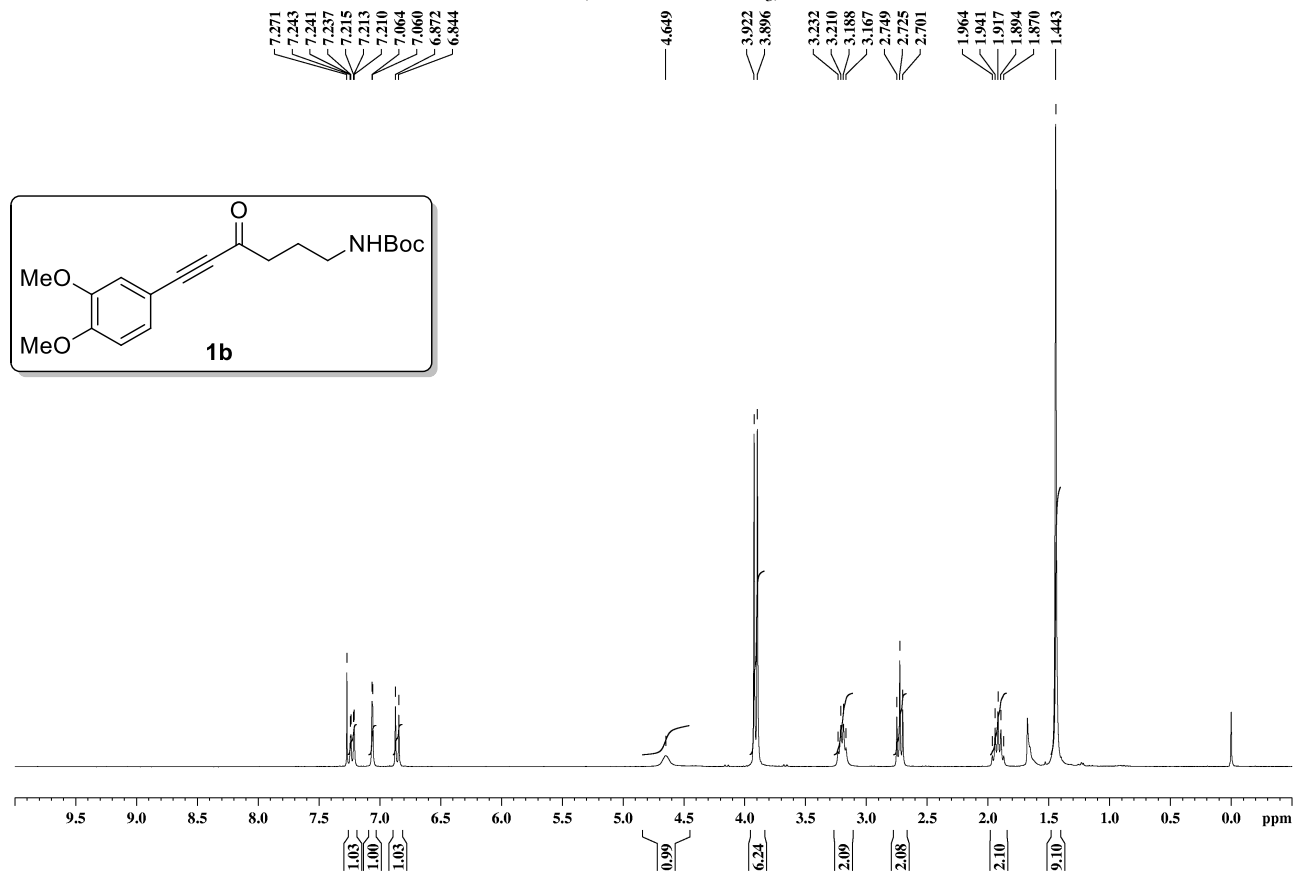

<sup>13</sup>C NMR (75 MHz, CDCl<sub>3</sub>); **1b**

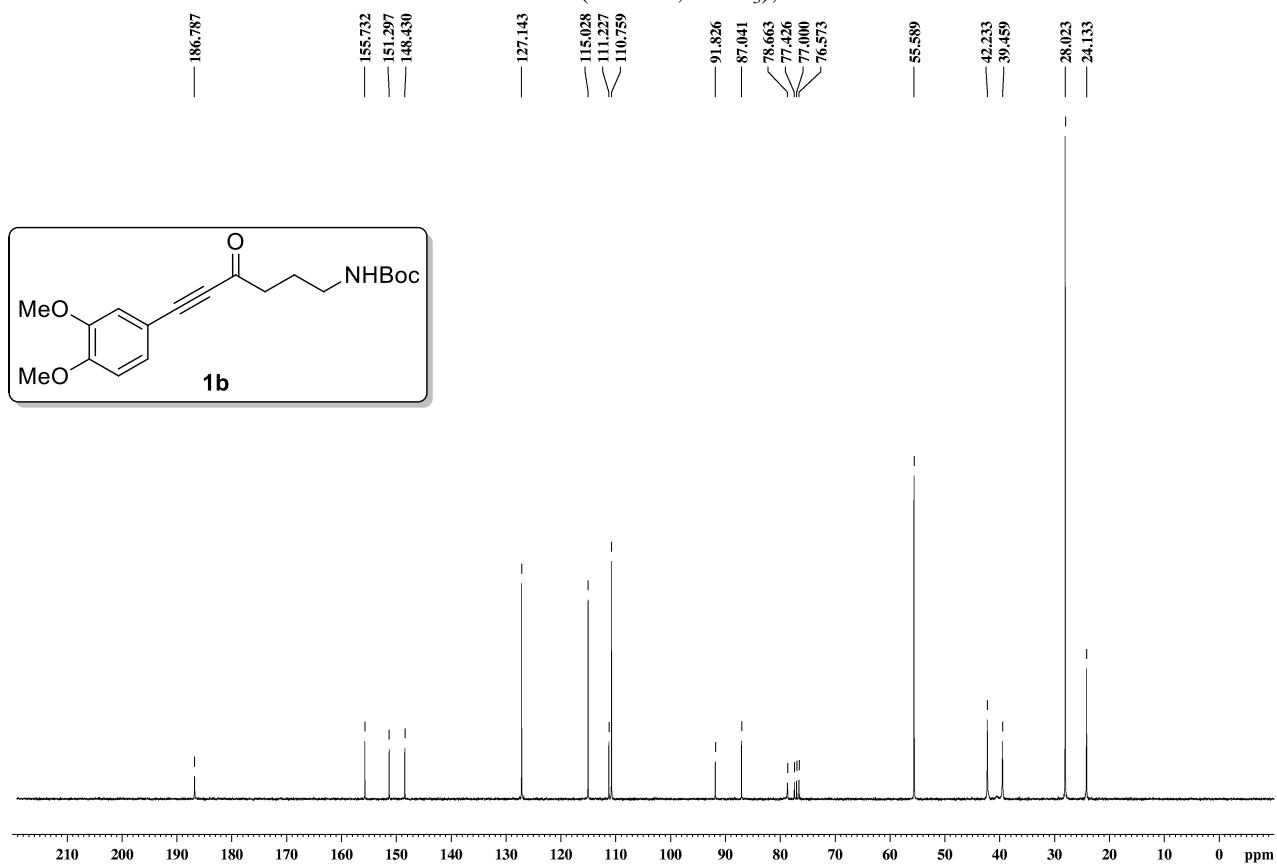

<sup>1</sup>H NMR (300 MHz, CDCl<sub>3</sub>); **1c**

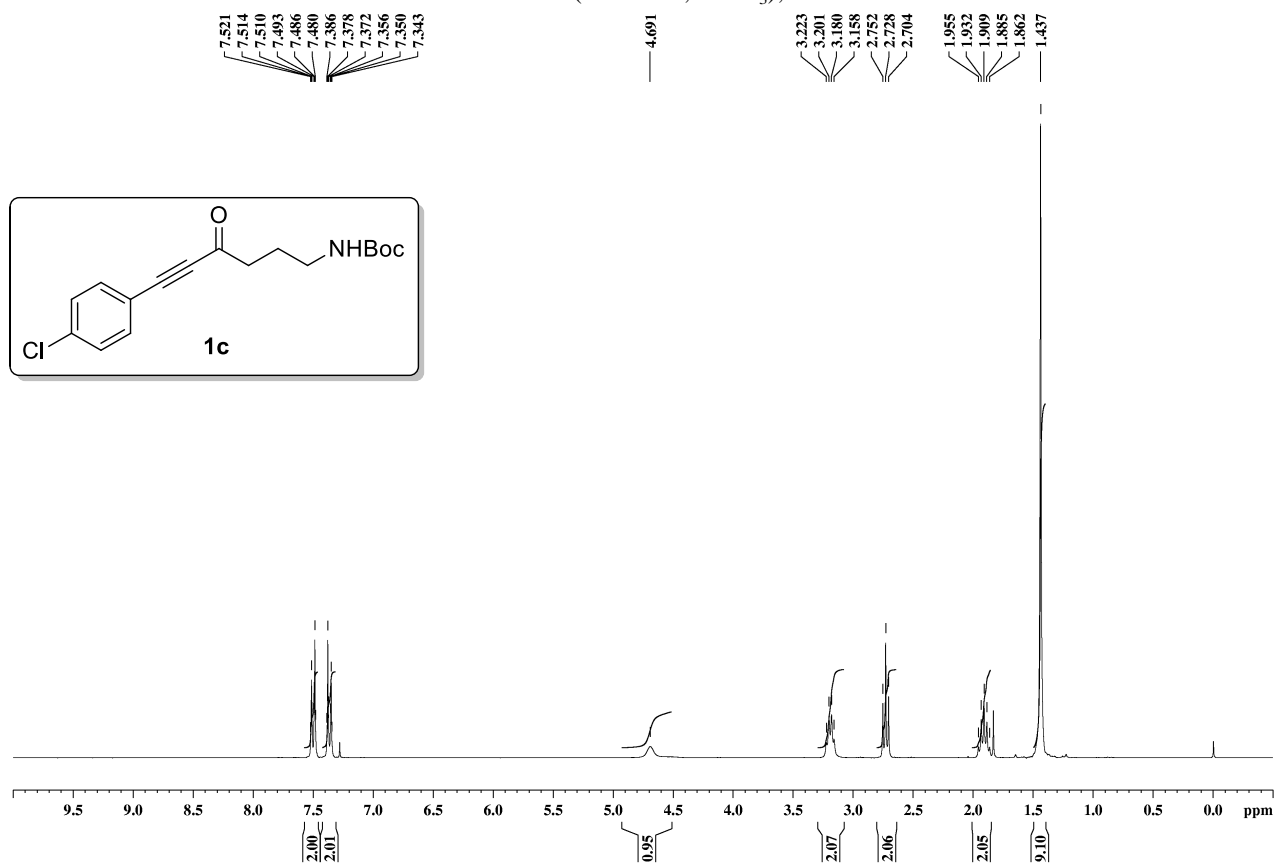

<sup>13</sup>C NMR (75 MHz, CDCl<sub>3</sub>); **1c**

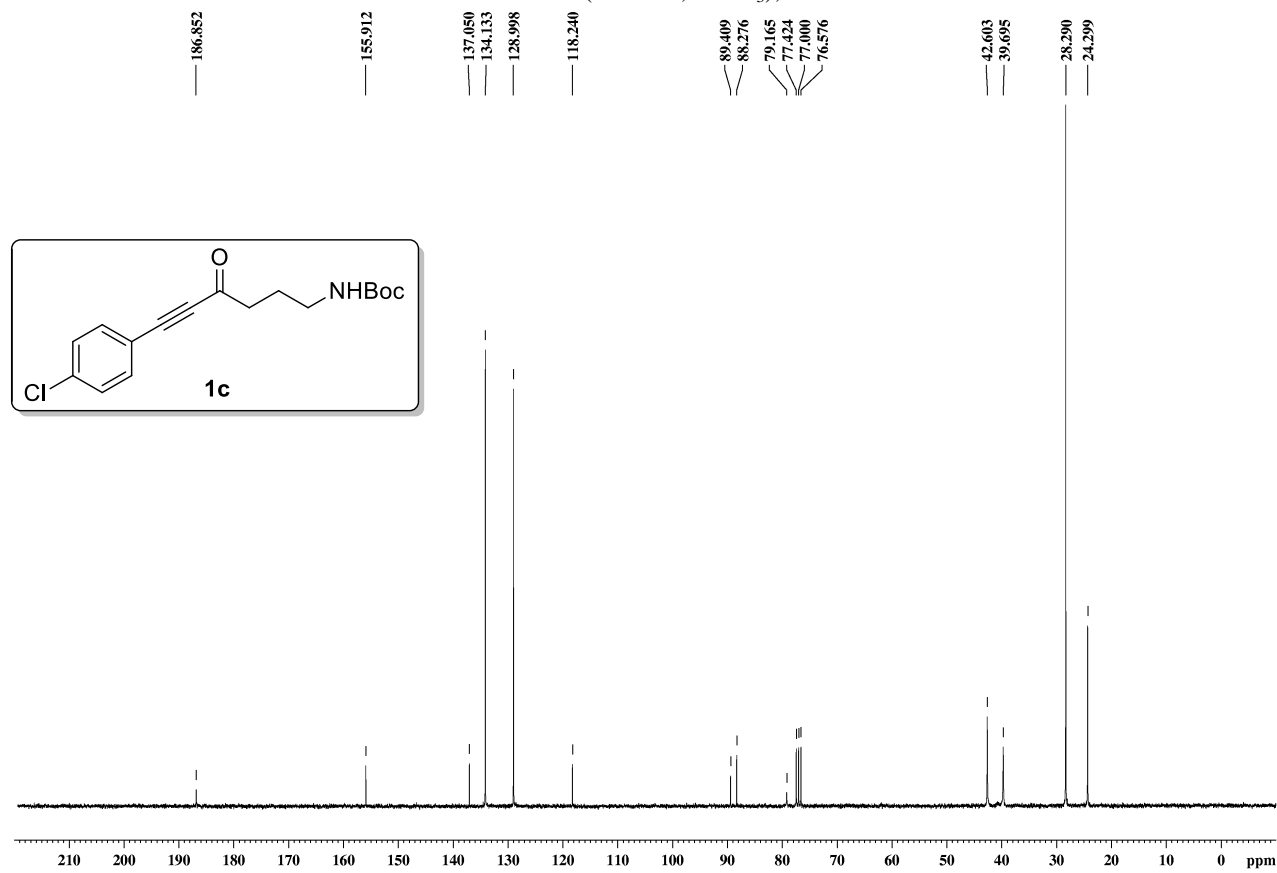

<sup>1</sup>H NMR (300 MHz, CDCl<sub>3</sub>); **1d**

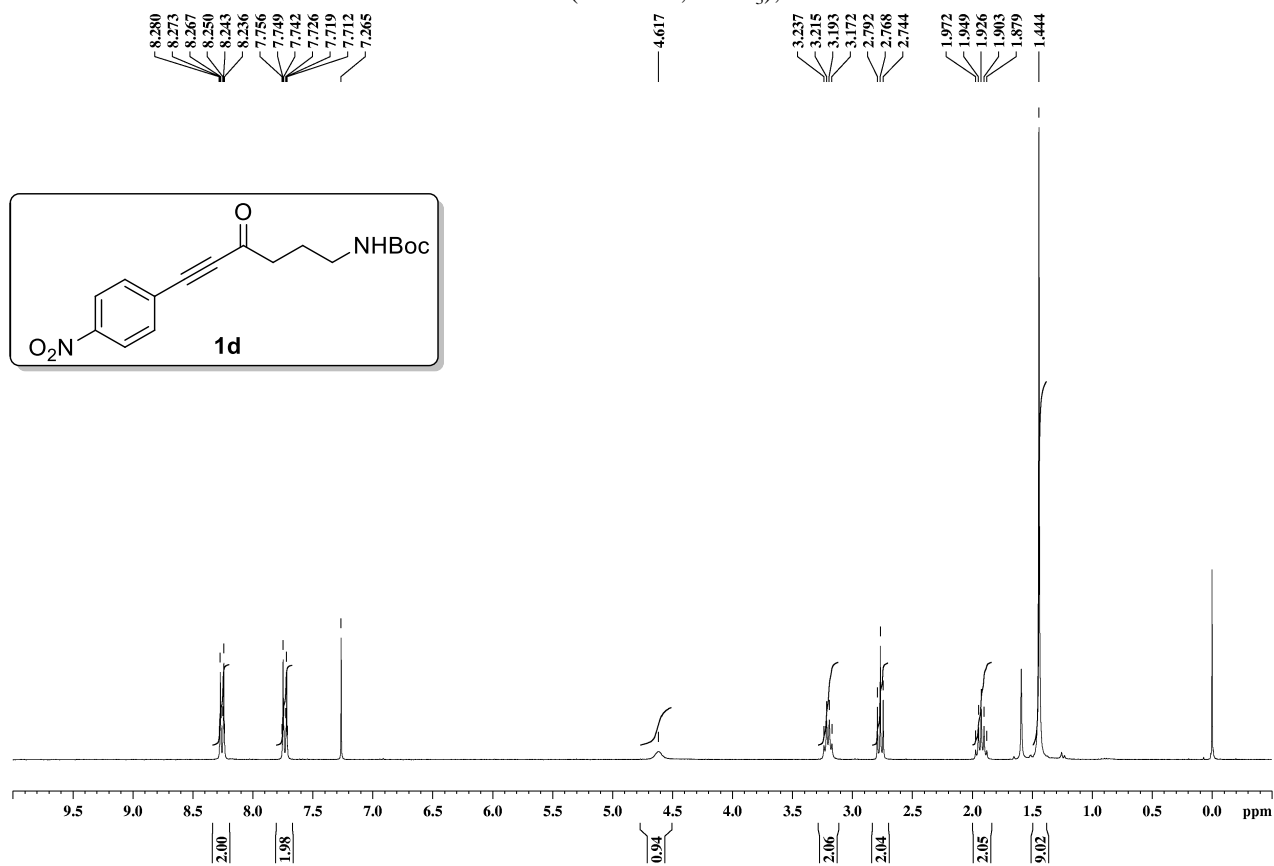

<sup>13</sup>C NMR (75 MHz, CDCl<sub>3</sub>); **1d**

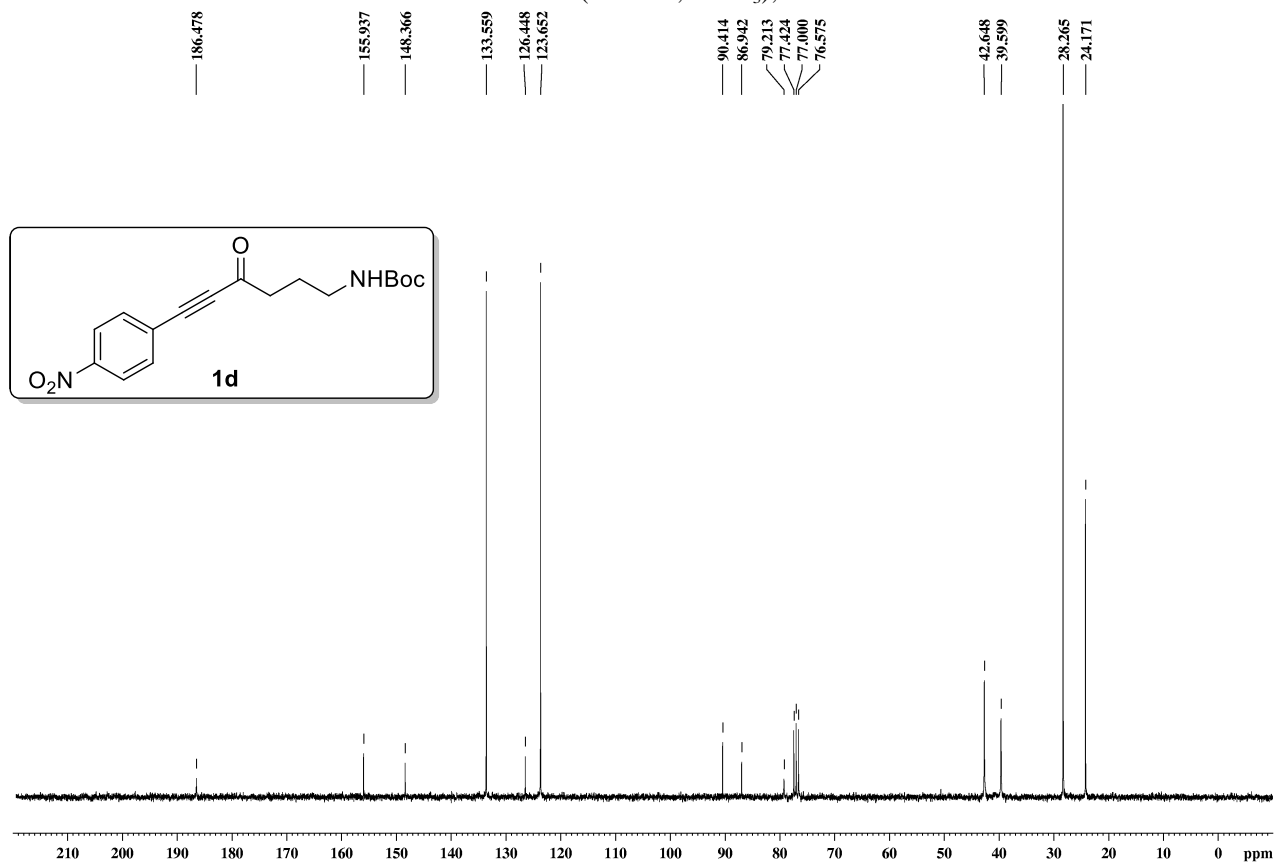



<sup>1</sup>H NMR (300 MHz, CDCl<sub>3</sub>); **1e**

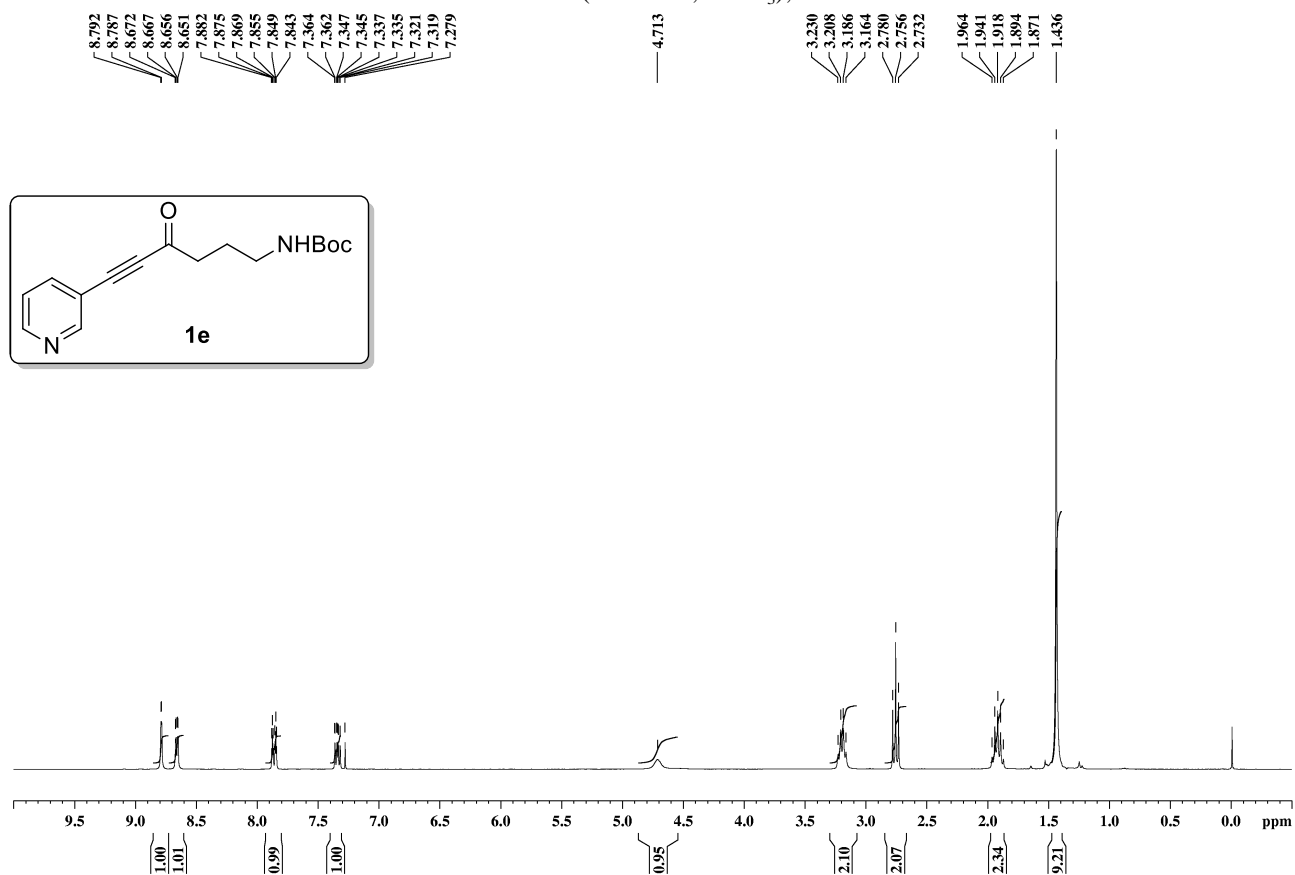

<sup>13</sup>C NMR (75 MHz, CDCl<sub>3</sub>); **1e**

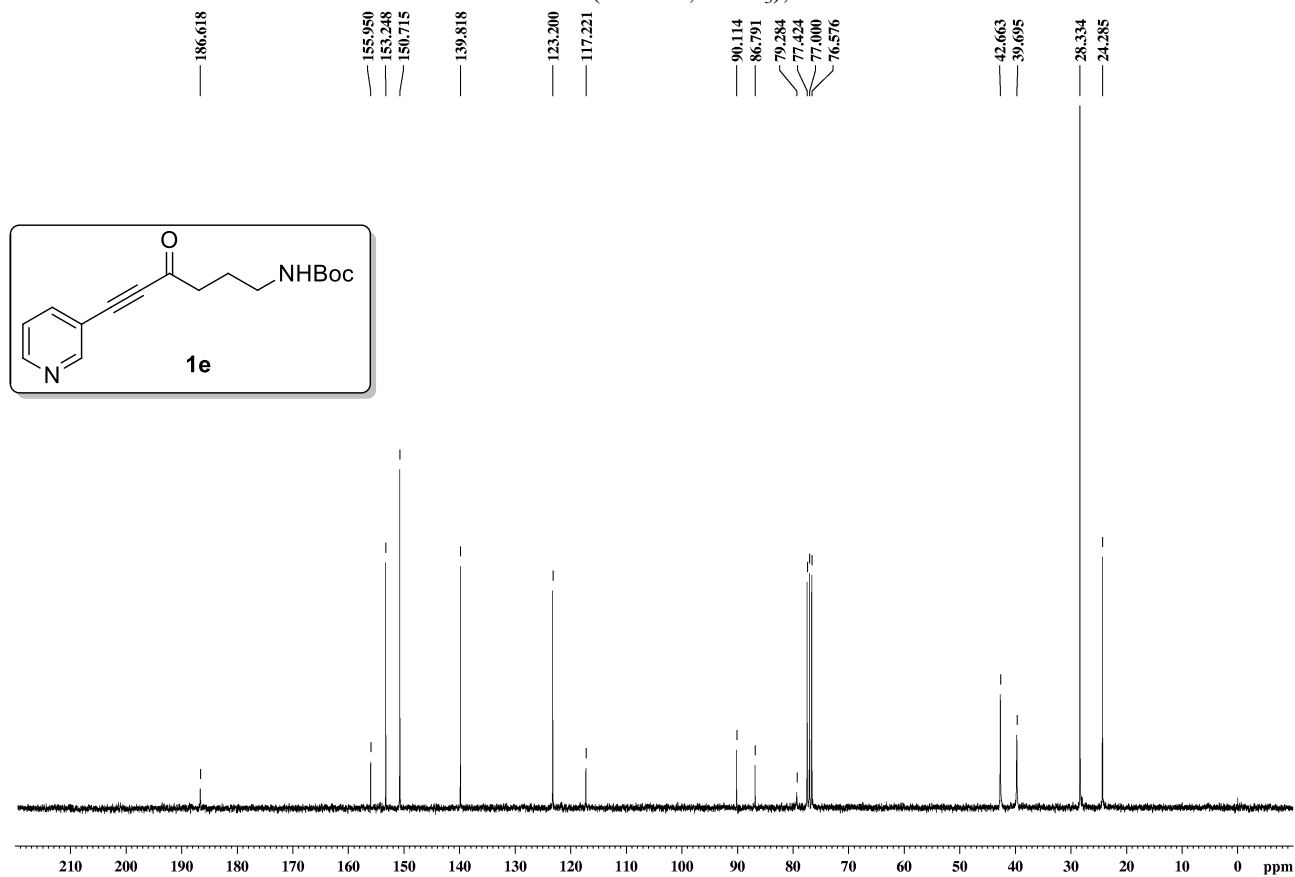

<sup>1</sup>H NMR (300 MHz, CDCl<sub>3</sub>); **1f**

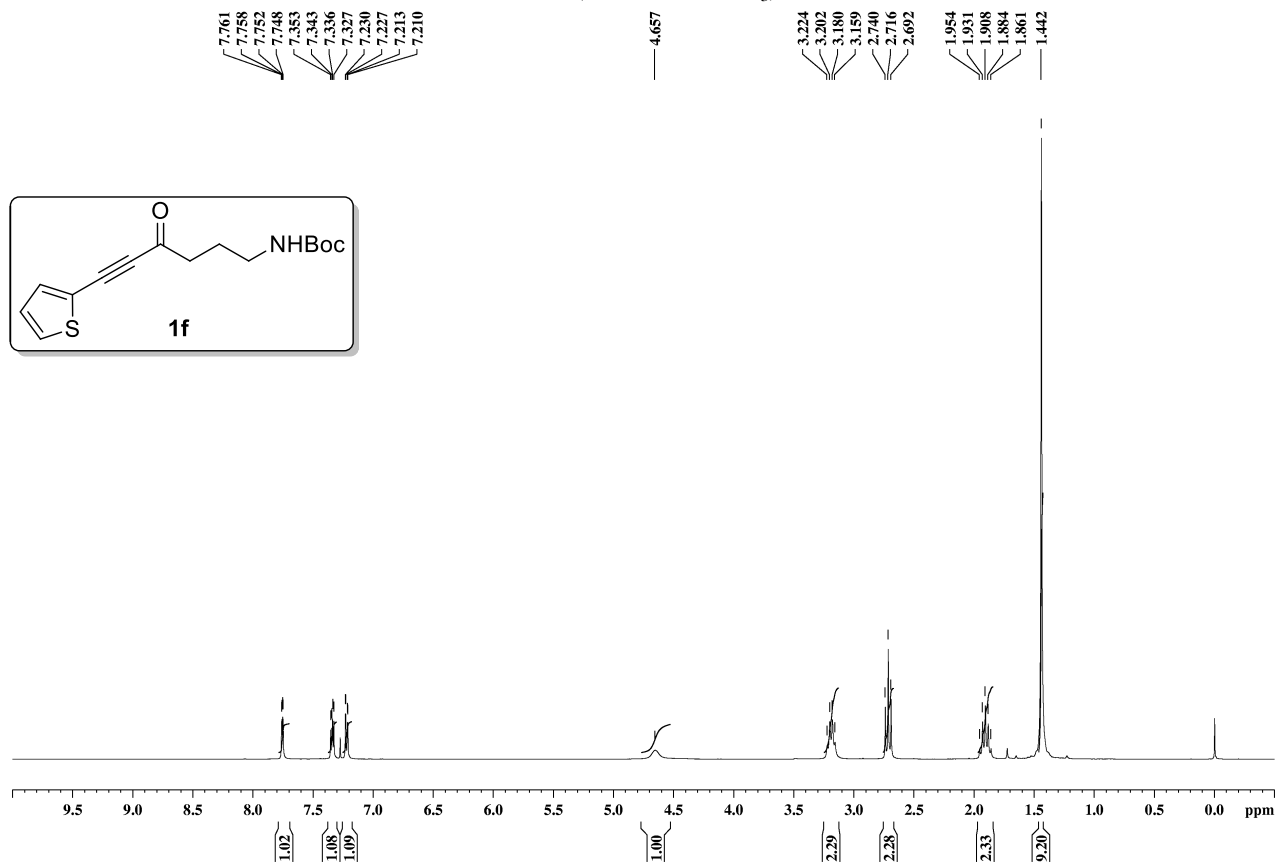

<sup>13</sup>C NMR (75 MHz, CDCl<sub>3</sub>); **1f**

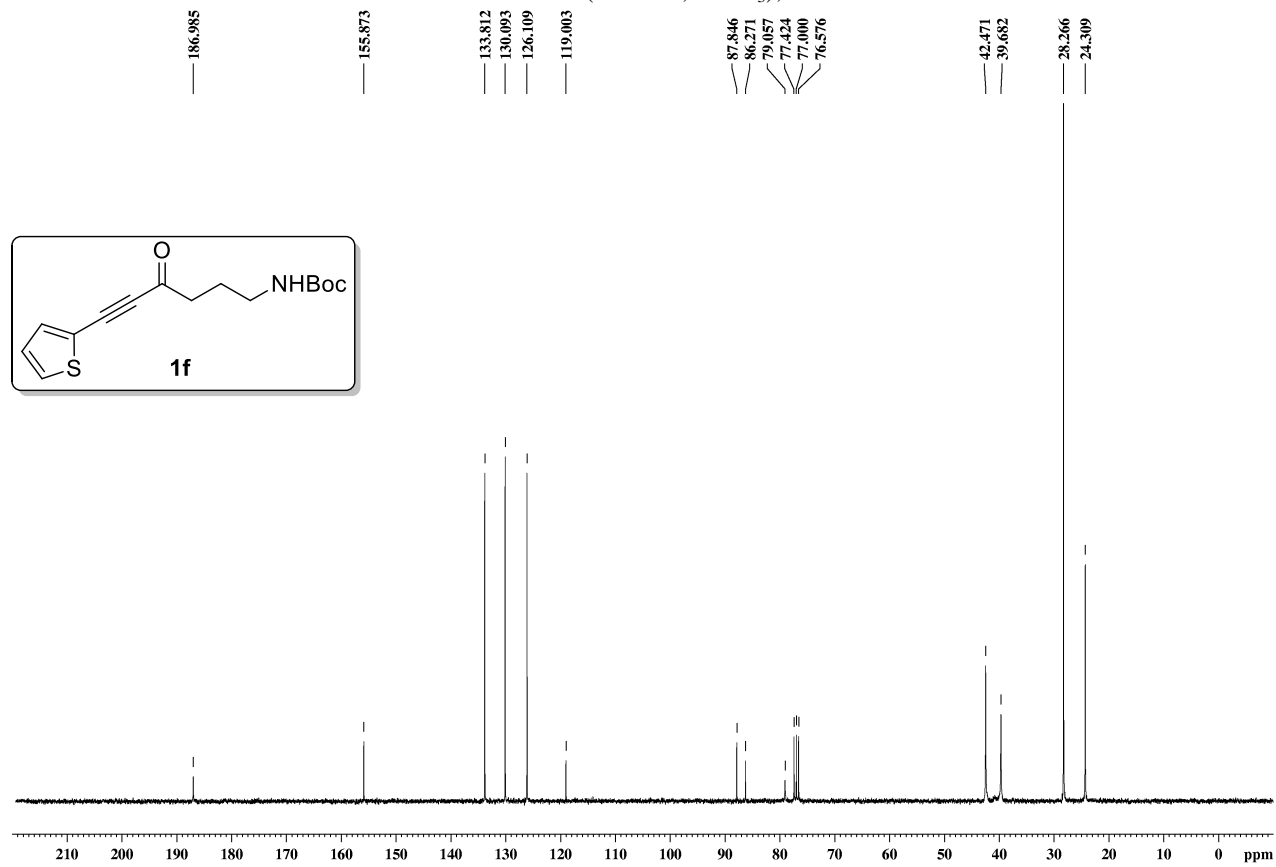

<sup>1</sup>H NMR (300 MHz, CDCl<sub>3</sub>); **1g**

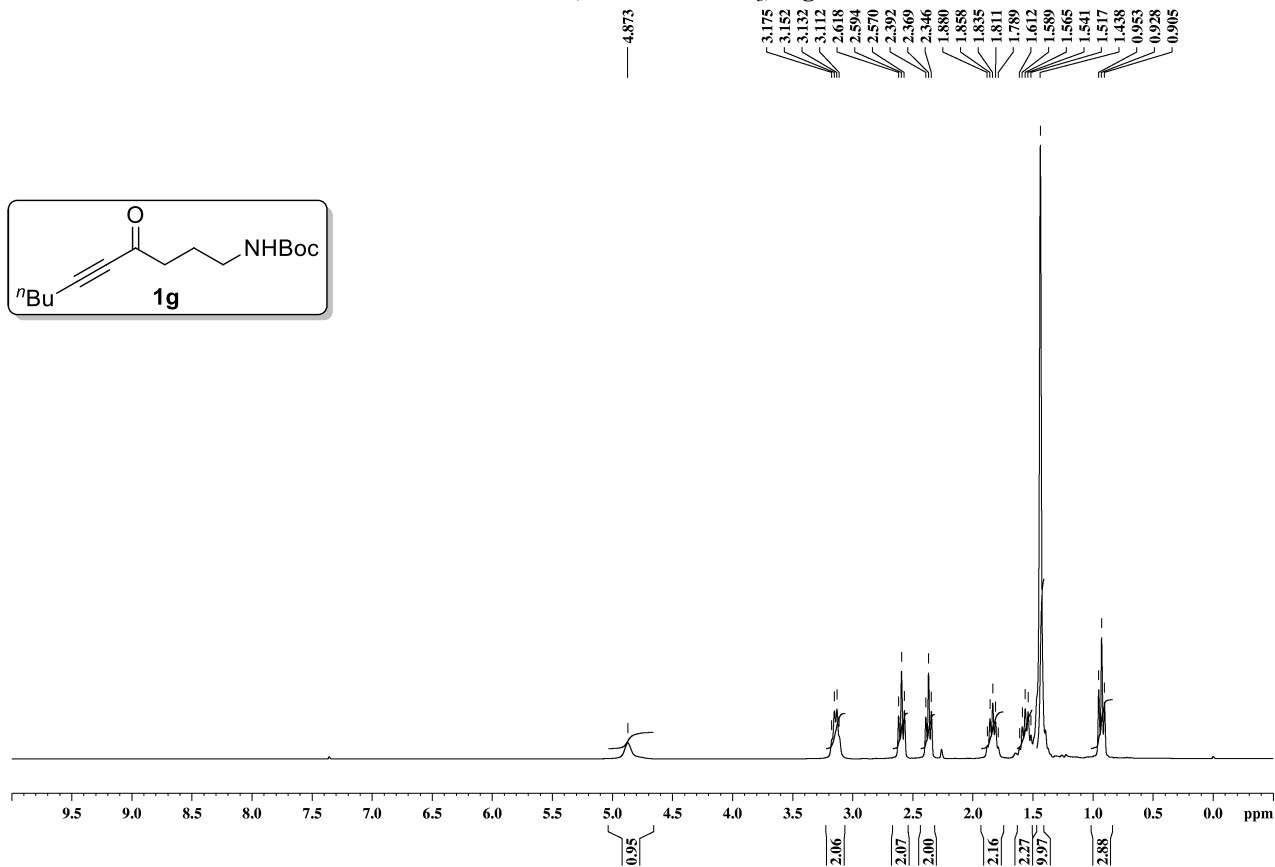

<sup>13</sup>C NMR (75 MHz, CDCl<sub>3</sub>); **1g**

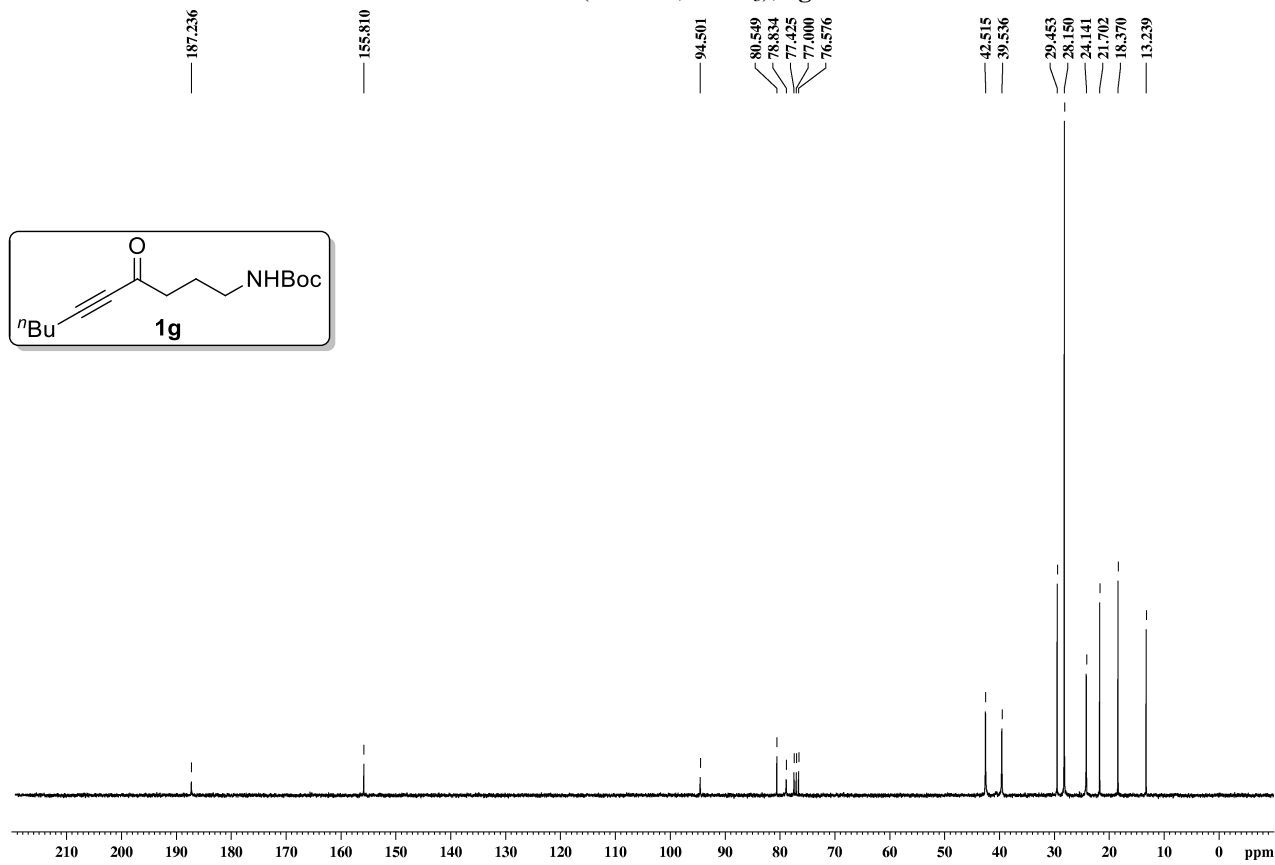

<sup>1</sup>H NMR (300 MHz, CDCl<sub>3</sub>); **1h**

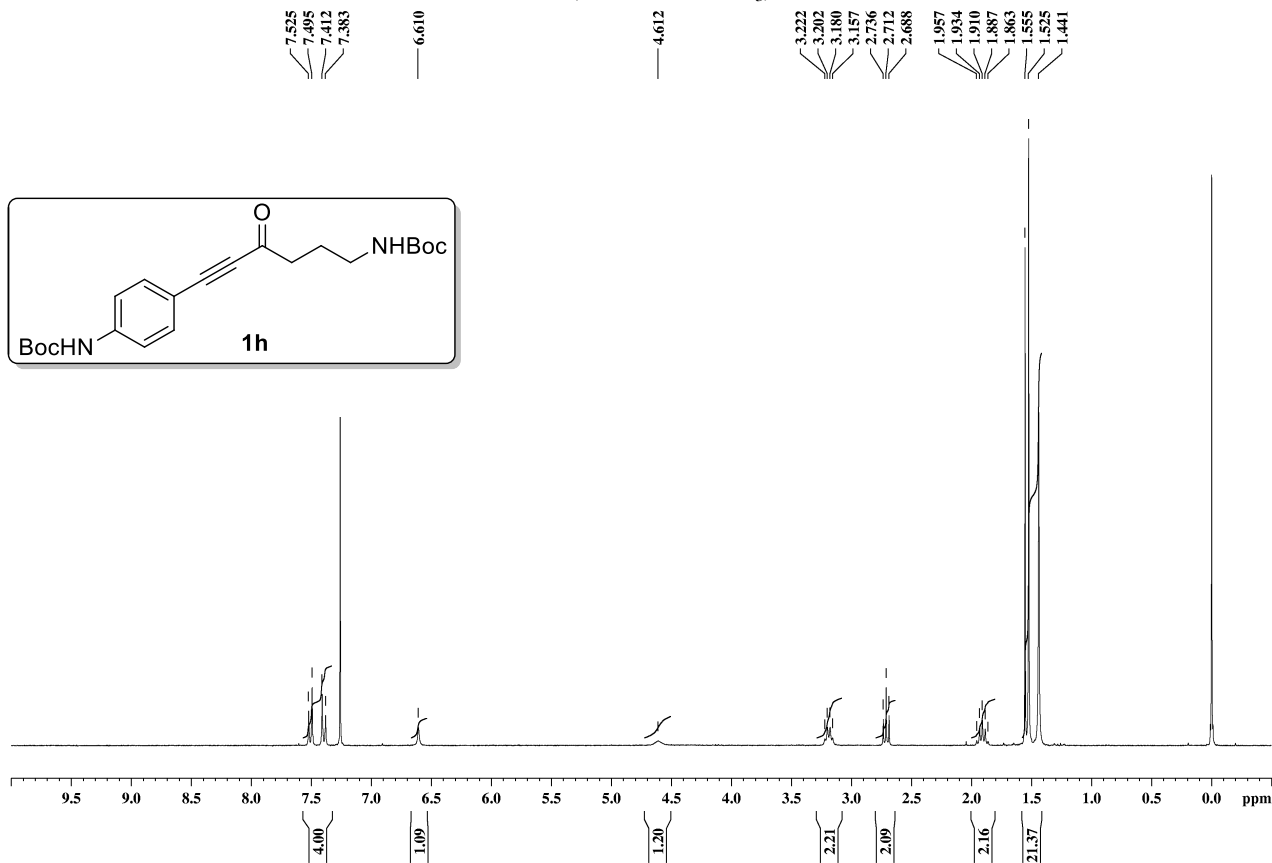

<sup>13</sup>C NMR (75 MHz, CDCl<sub>3</sub>); **1h**

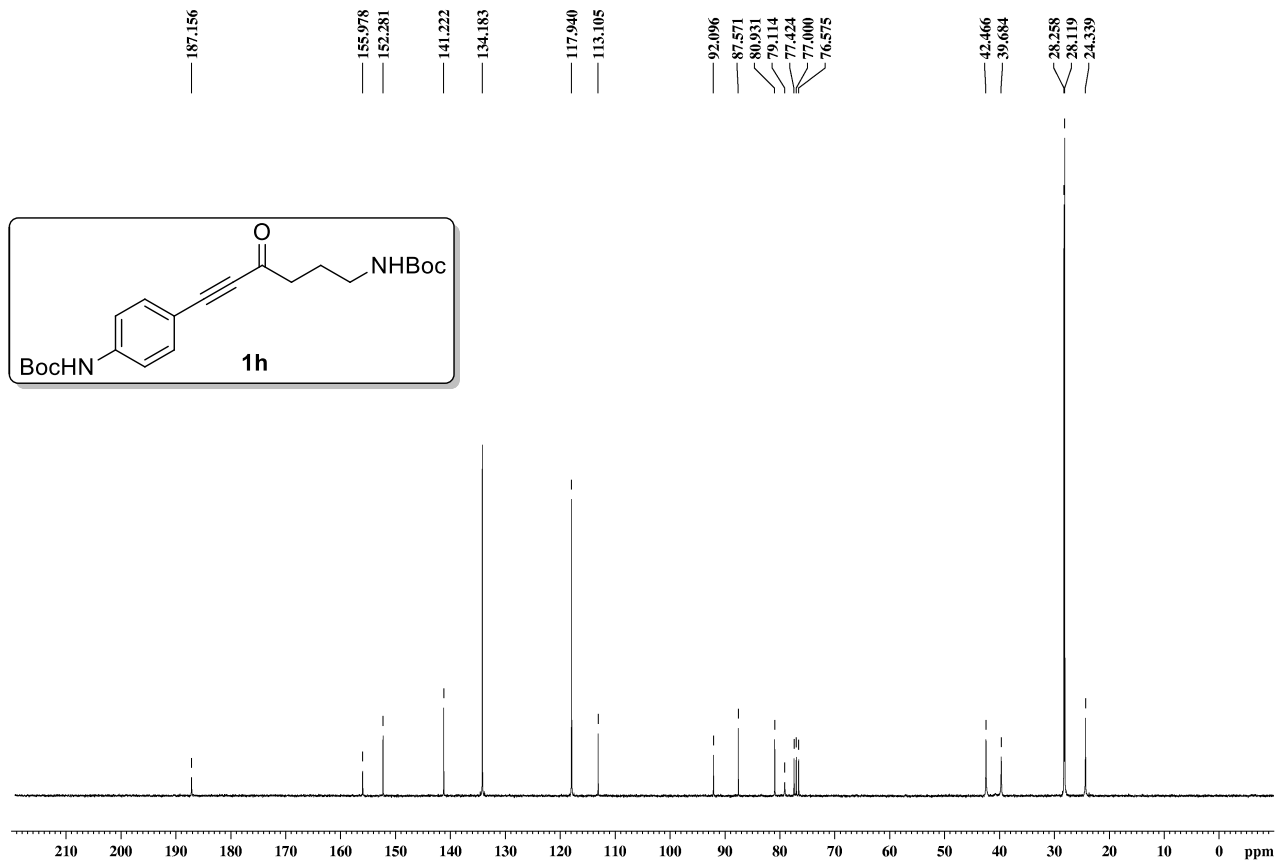

<sup>1</sup>H NMR (300 MHz, CDCl<sub>3</sub>); **1i**

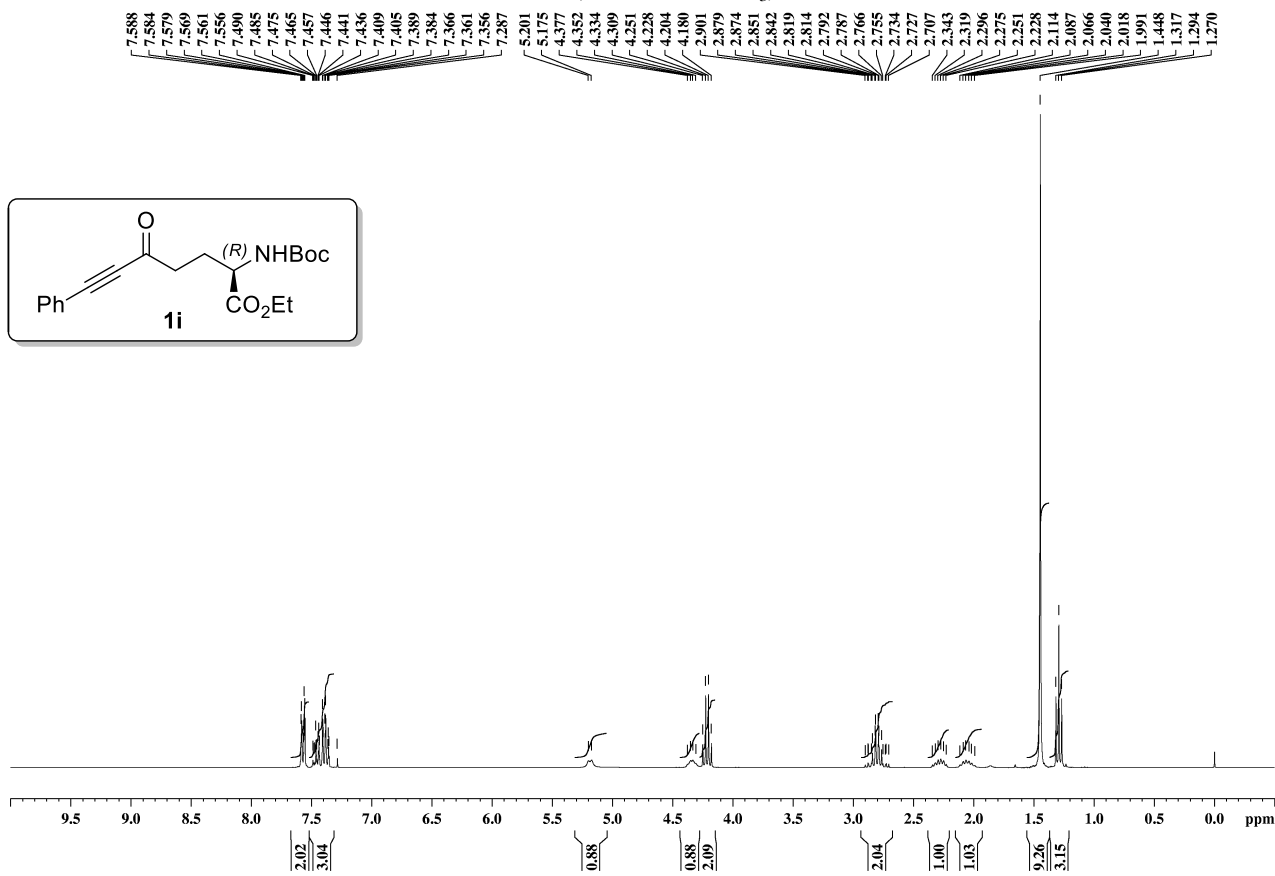

<sup>13</sup>C NMR (75 MHz, CDCl<sub>3</sub>); **1i**

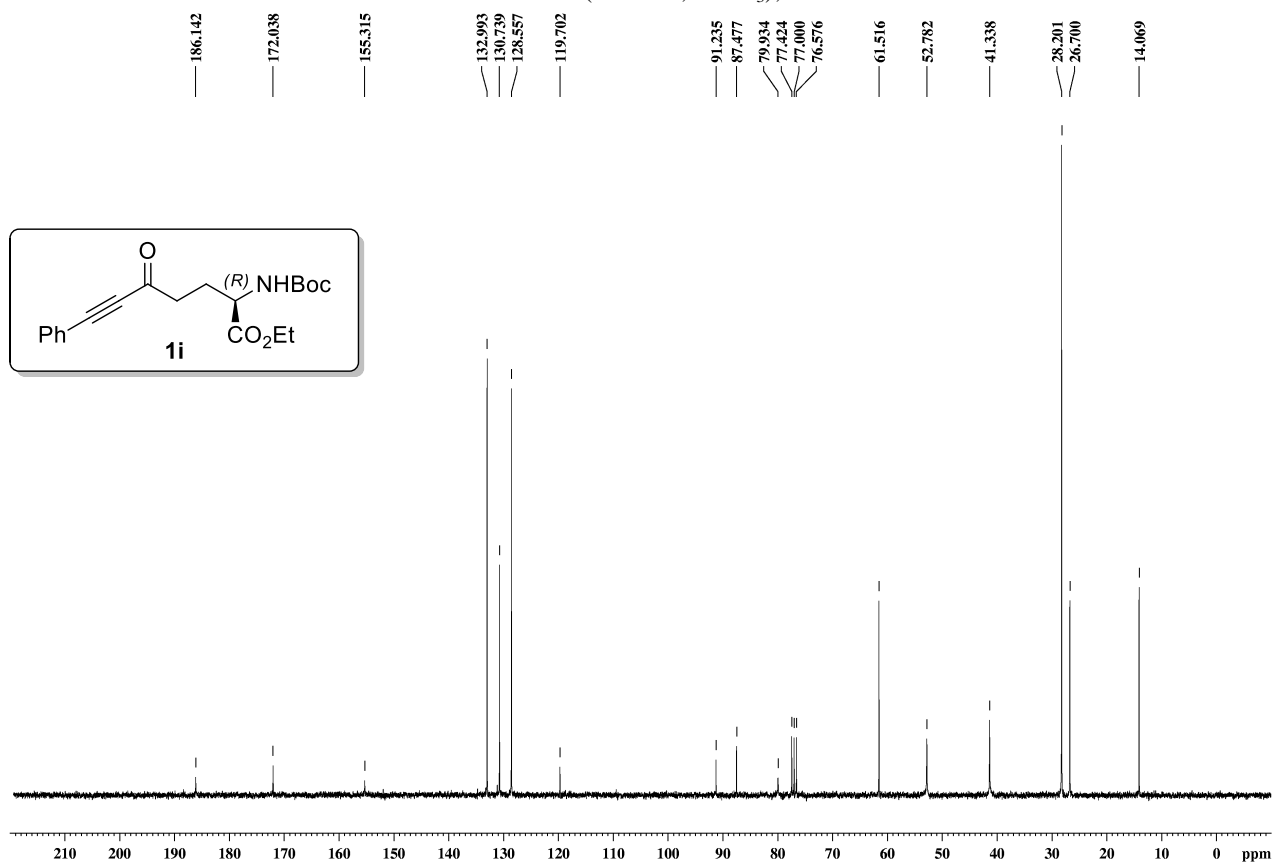

<sup>1</sup>H NMR (300 MHz, CDCl<sub>3</sub>); **1j**

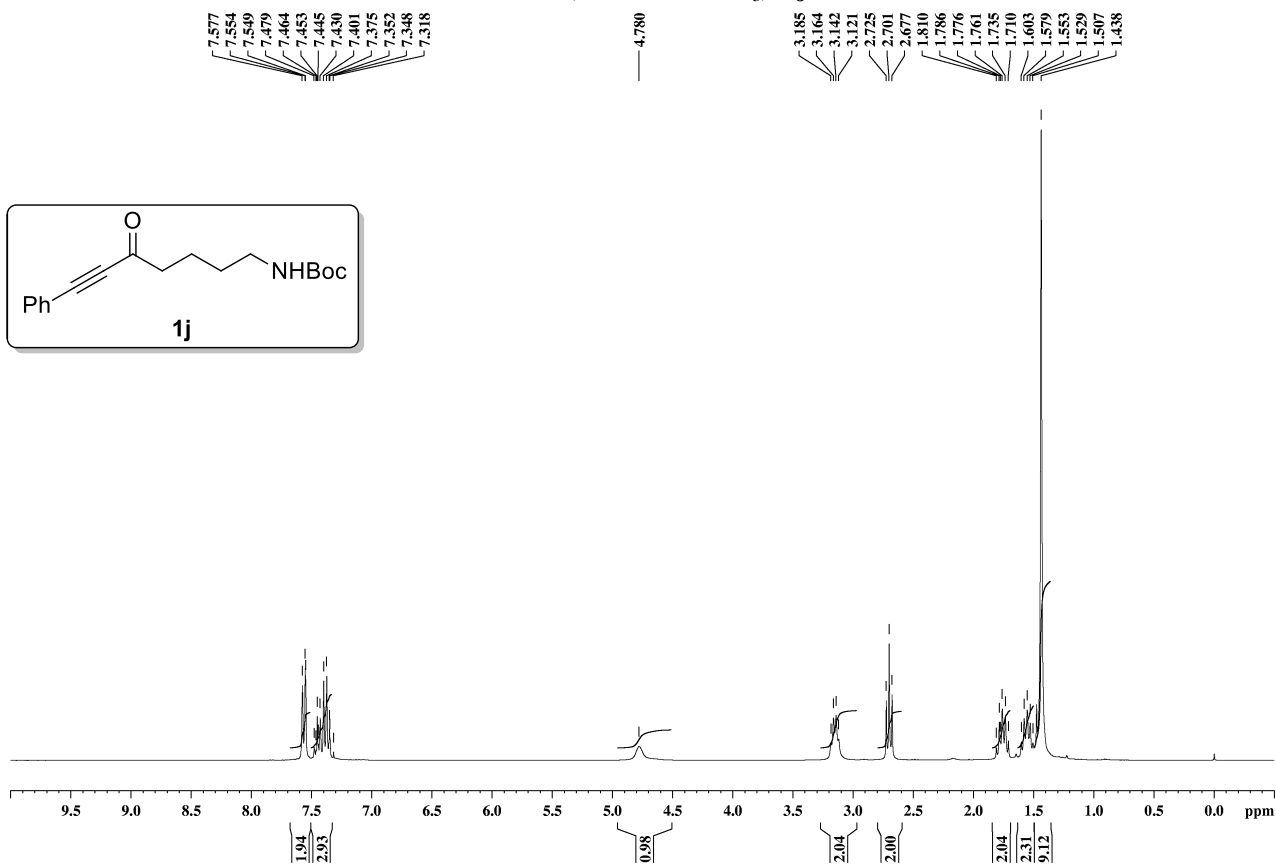

<sup>13</sup>C NMR (75 MHz, CDCl<sub>3</sub>); **1j**

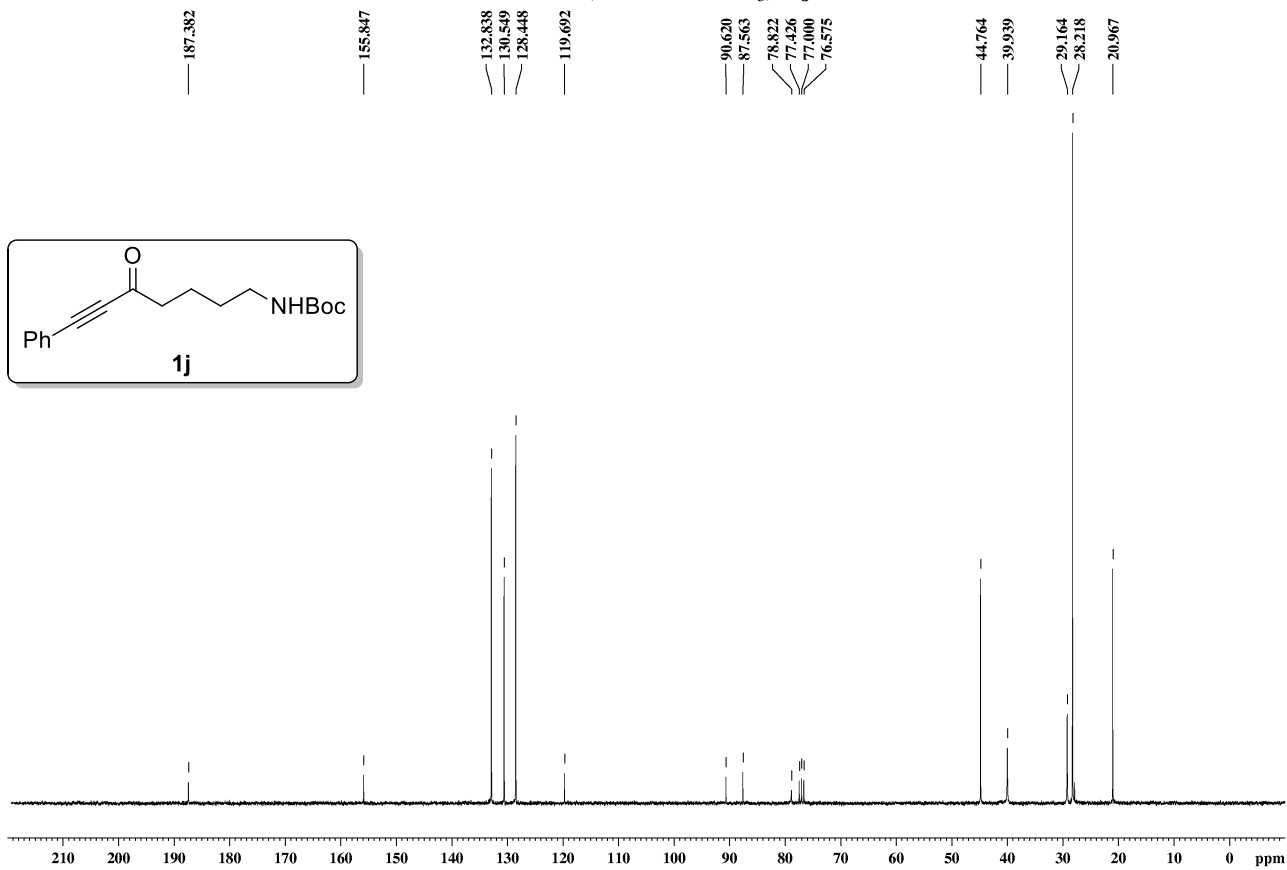

<sup>1</sup>H NMR (300 MHz, CDCl<sub>3</sub>); **1k**

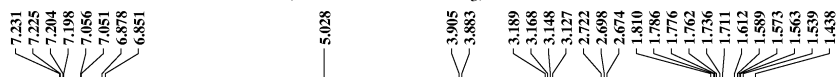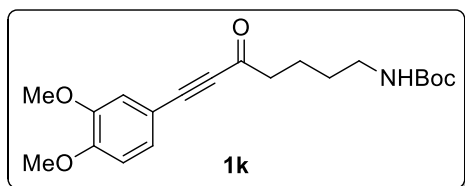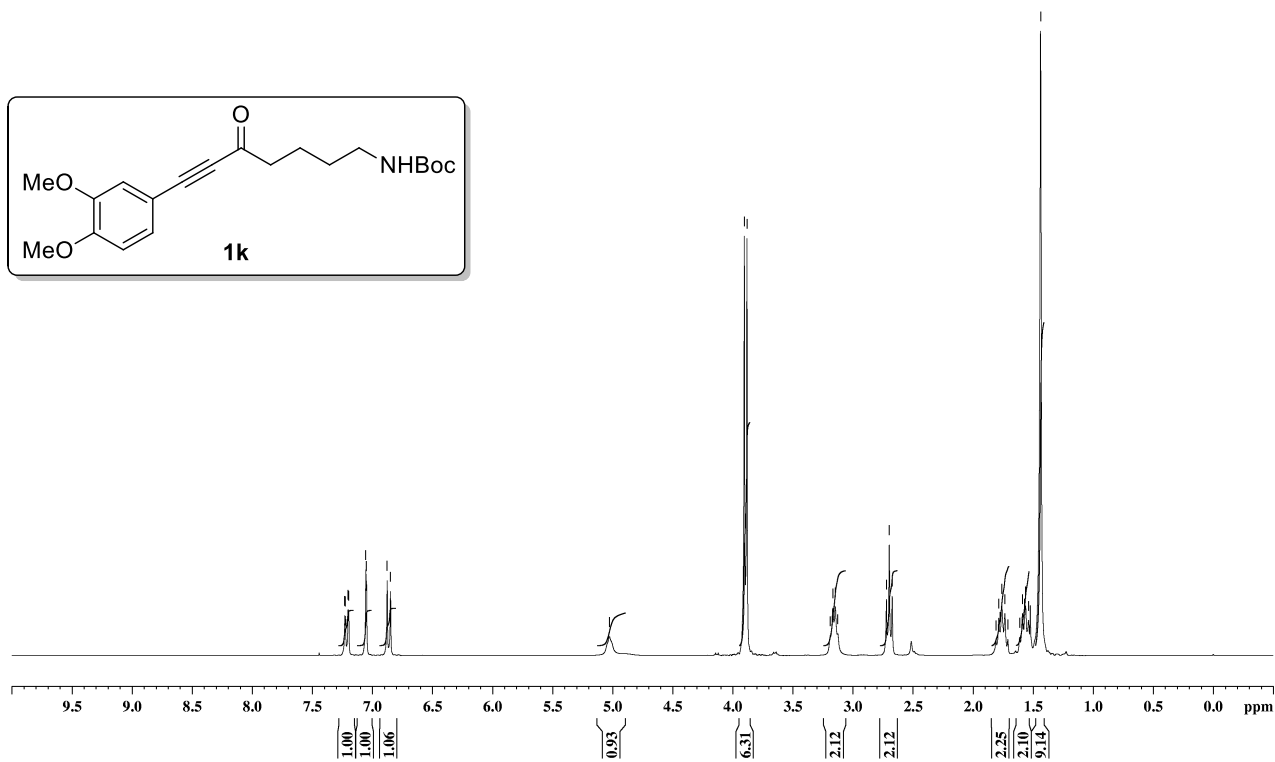

<sup>13</sup>C NMR (75 MHz, CDCl<sub>3</sub>); **1k**

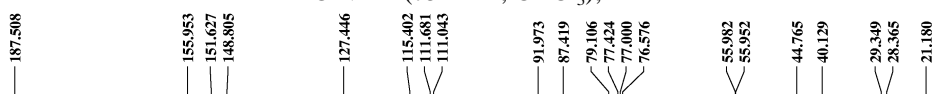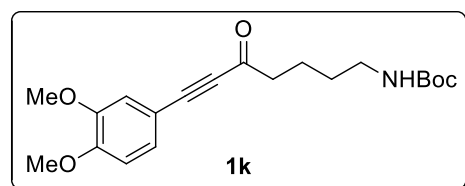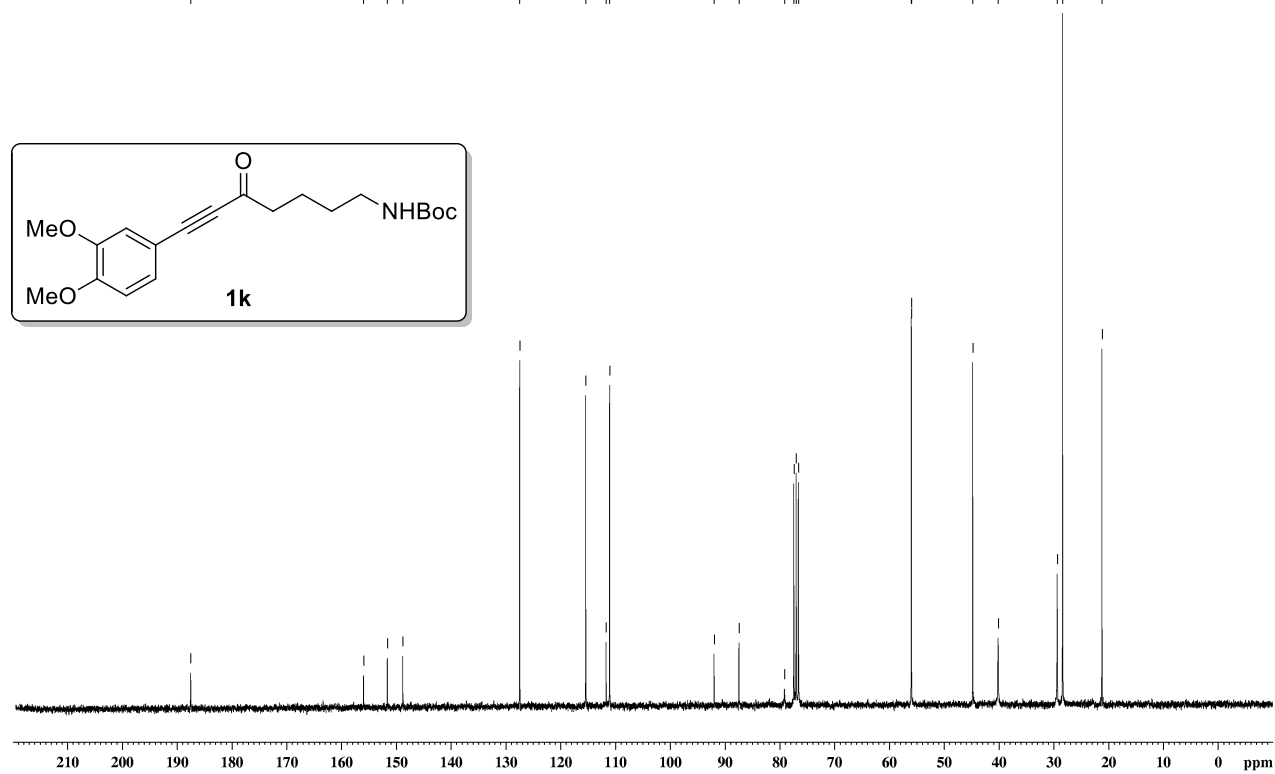

<sup>1</sup>H NMR (300 MHz, CDCl<sub>3</sub>); **11**

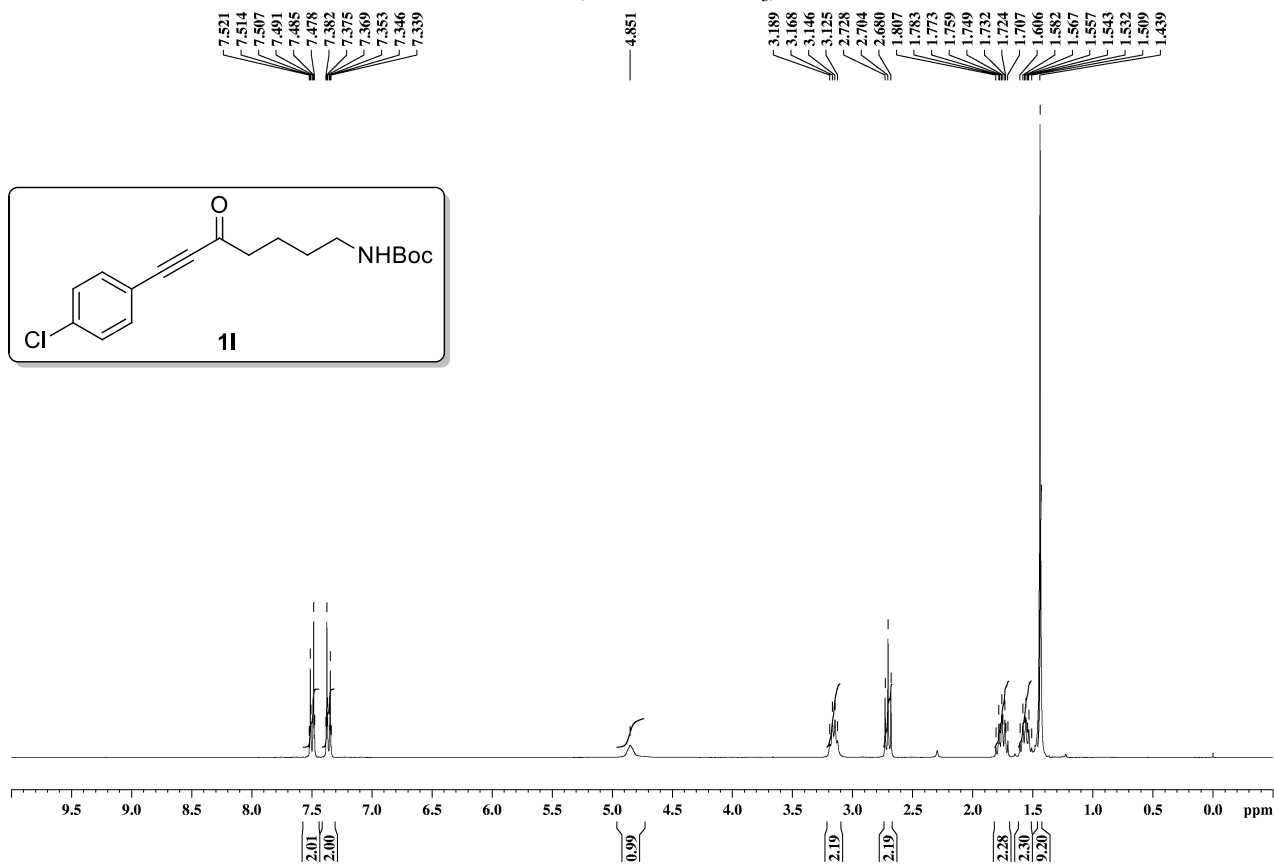

<sup>13</sup>C NMR (75 MHz, CDCl<sub>3</sub>); **11**

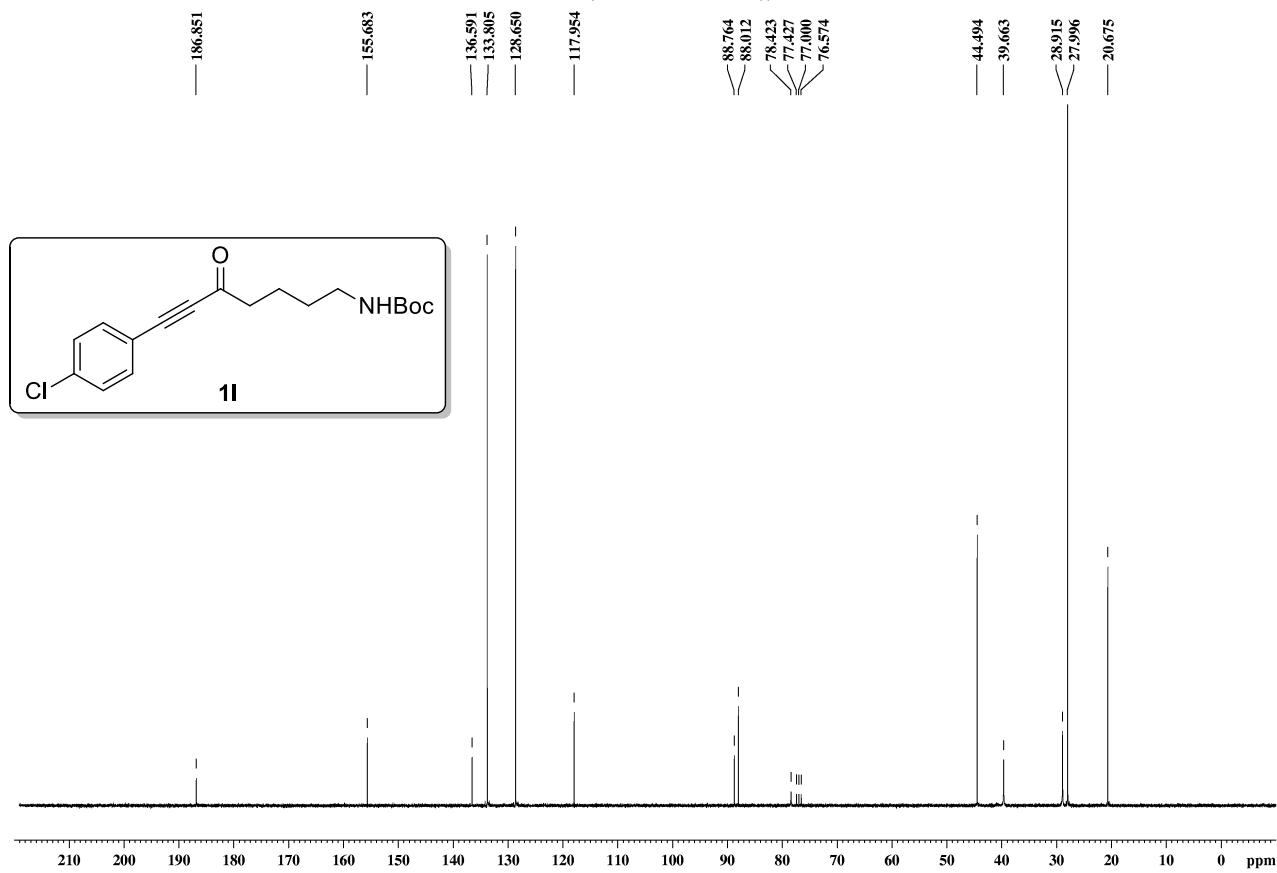



<sup>1</sup>H NMR (300 MHz, CDCl<sub>3</sub>); **1m**

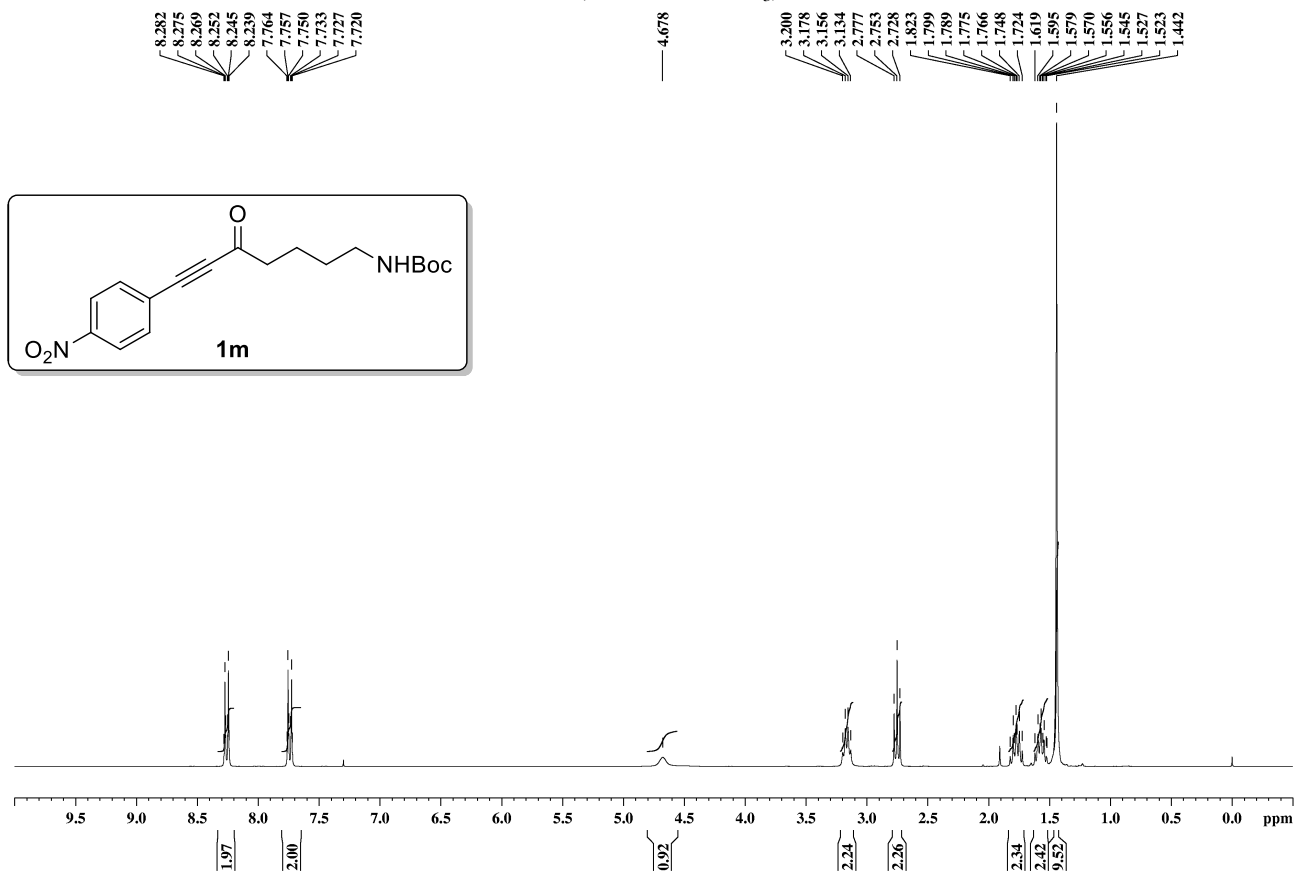

<sup>13</sup>C NMR (75 MHz, CDCl<sub>3</sub>); **1m**

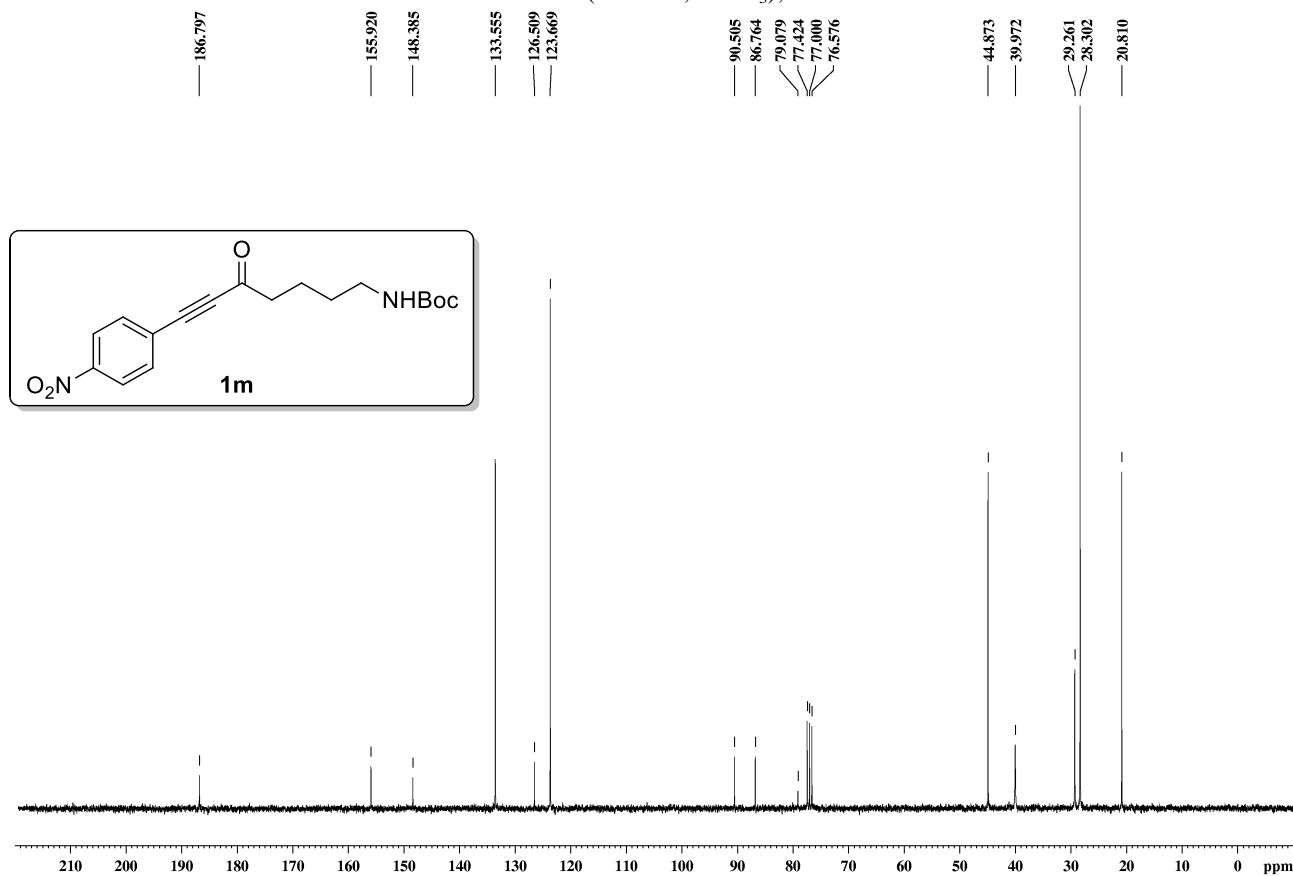

<sup>1</sup>H NMR (300 MHz, CDCl<sub>3</sub>); **1n**

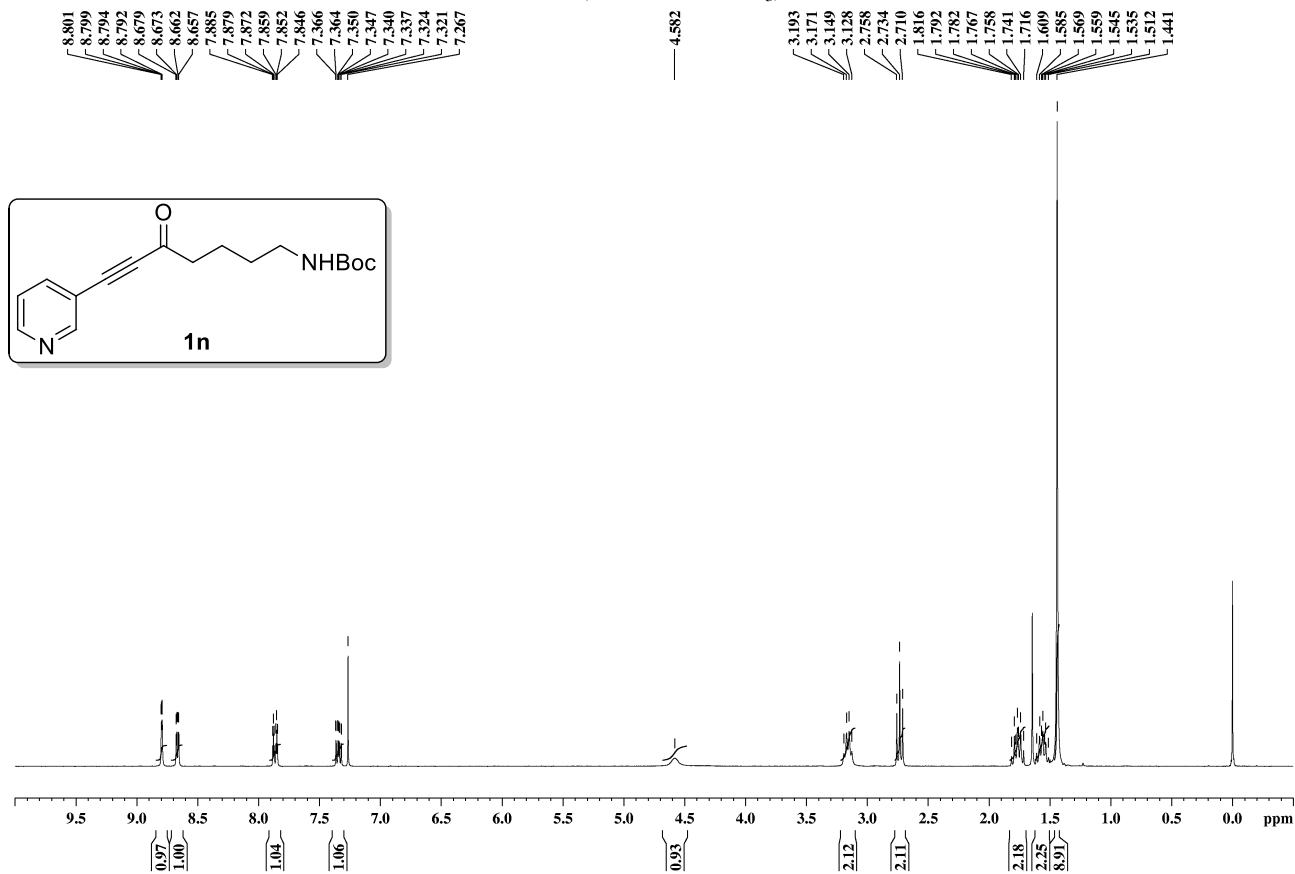

<sup>13</sup>C NMR (75 MHz, CDCl<sub>3</sub>); **1n**

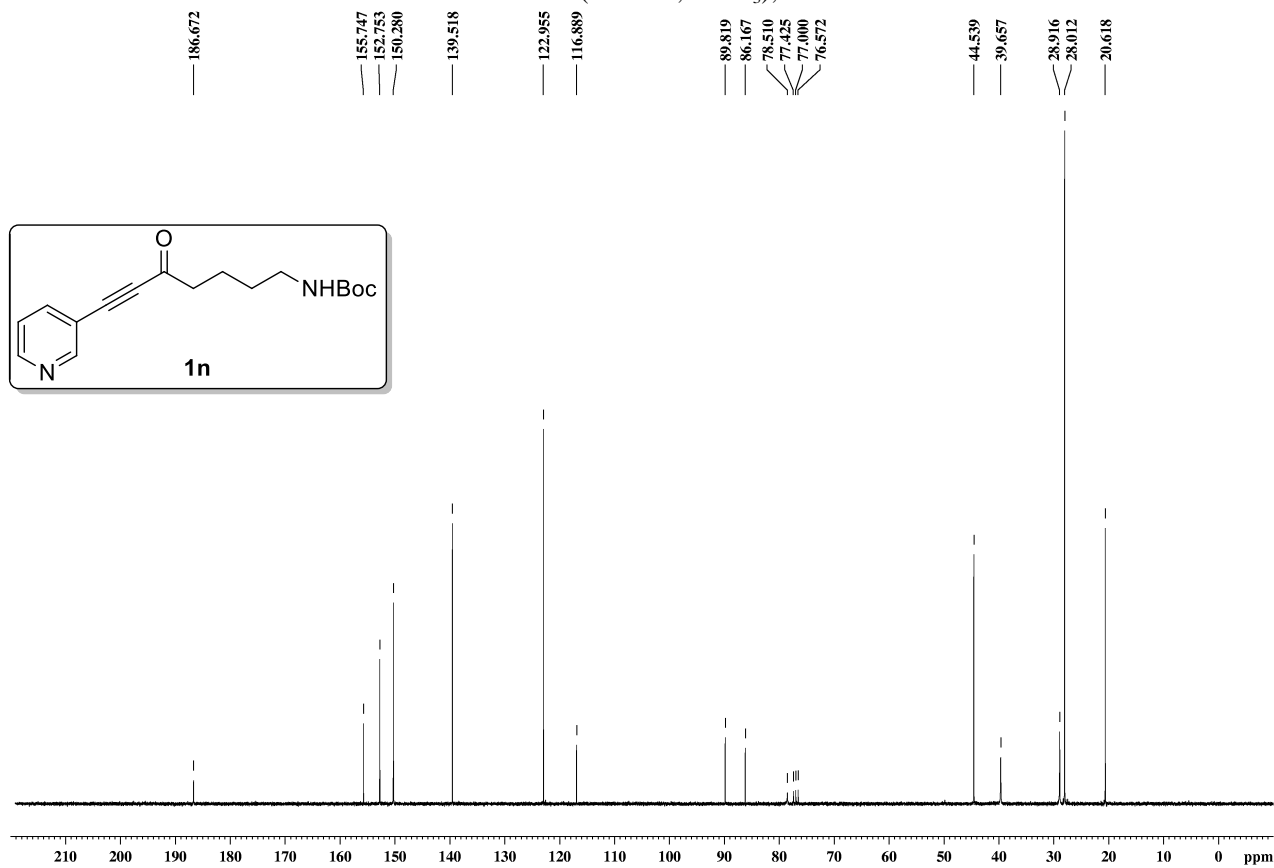

<sup>1</sup>H NMR (300 MHz, CDCl<sub>3</sub>); **1o**

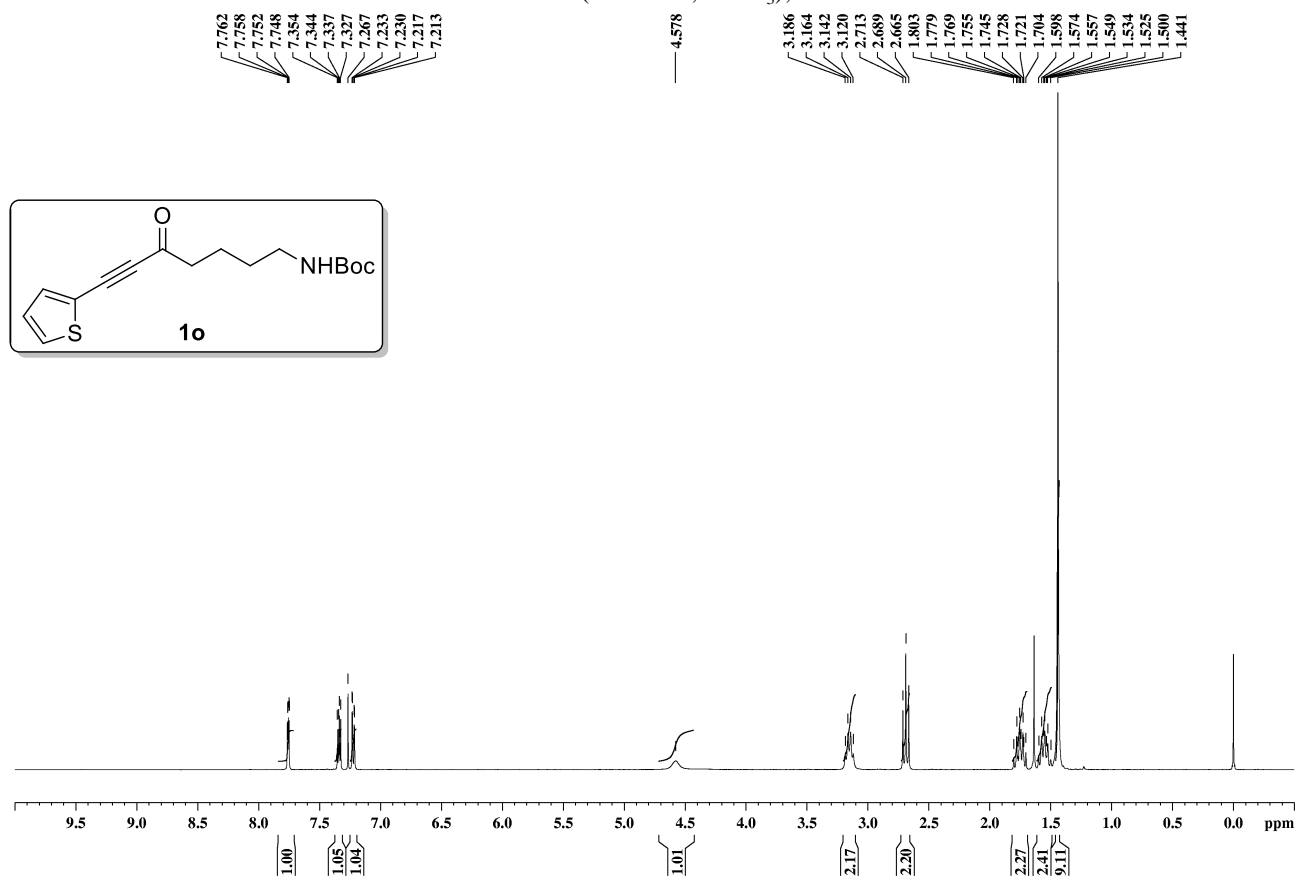

<sup>13</sup>C NMR (75 MHz, CDCl<sub>3</sub>); **1o**

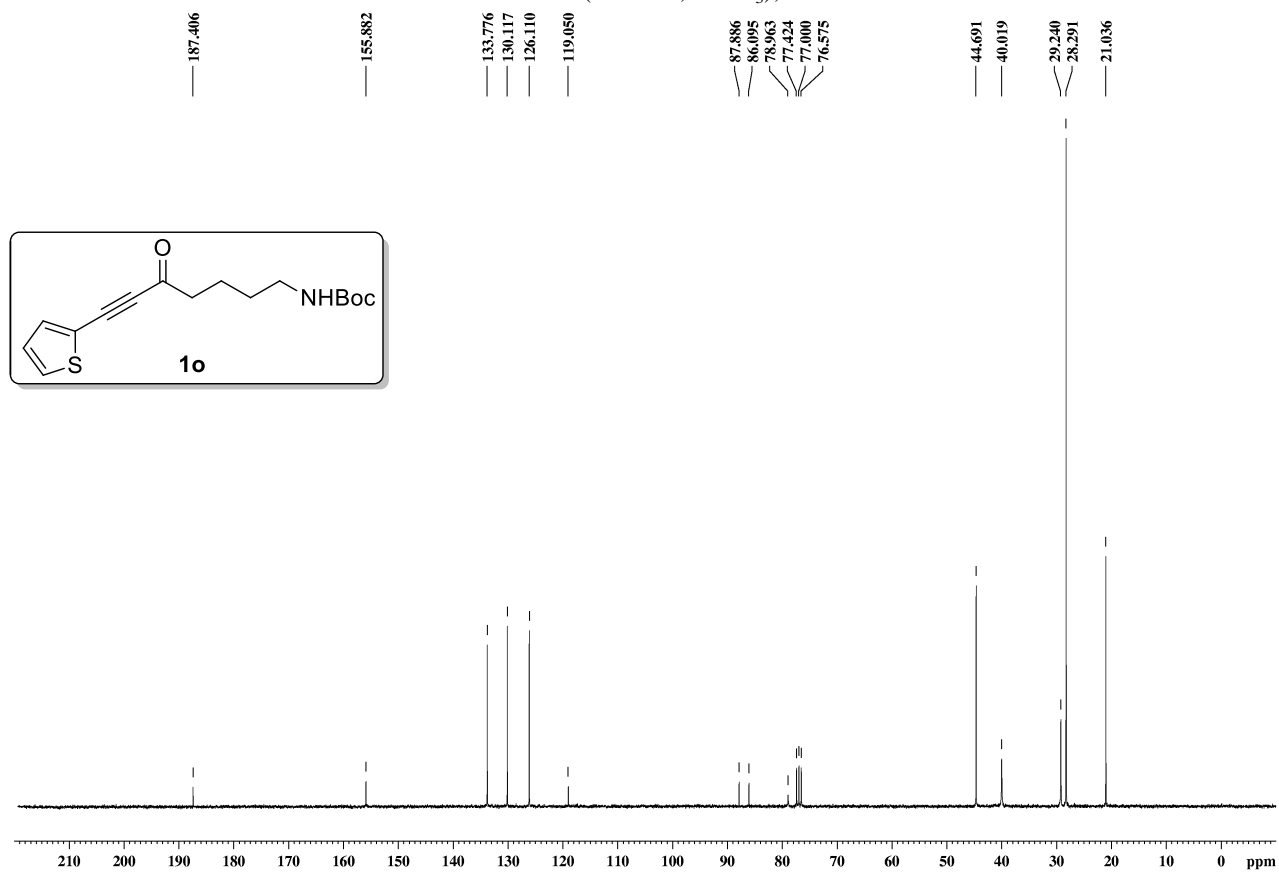

<sup>1</sup>H NMR (300 MHz, CDCl<sub>3</sub>); **1p**

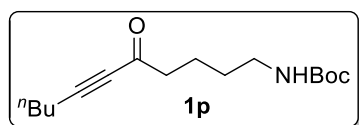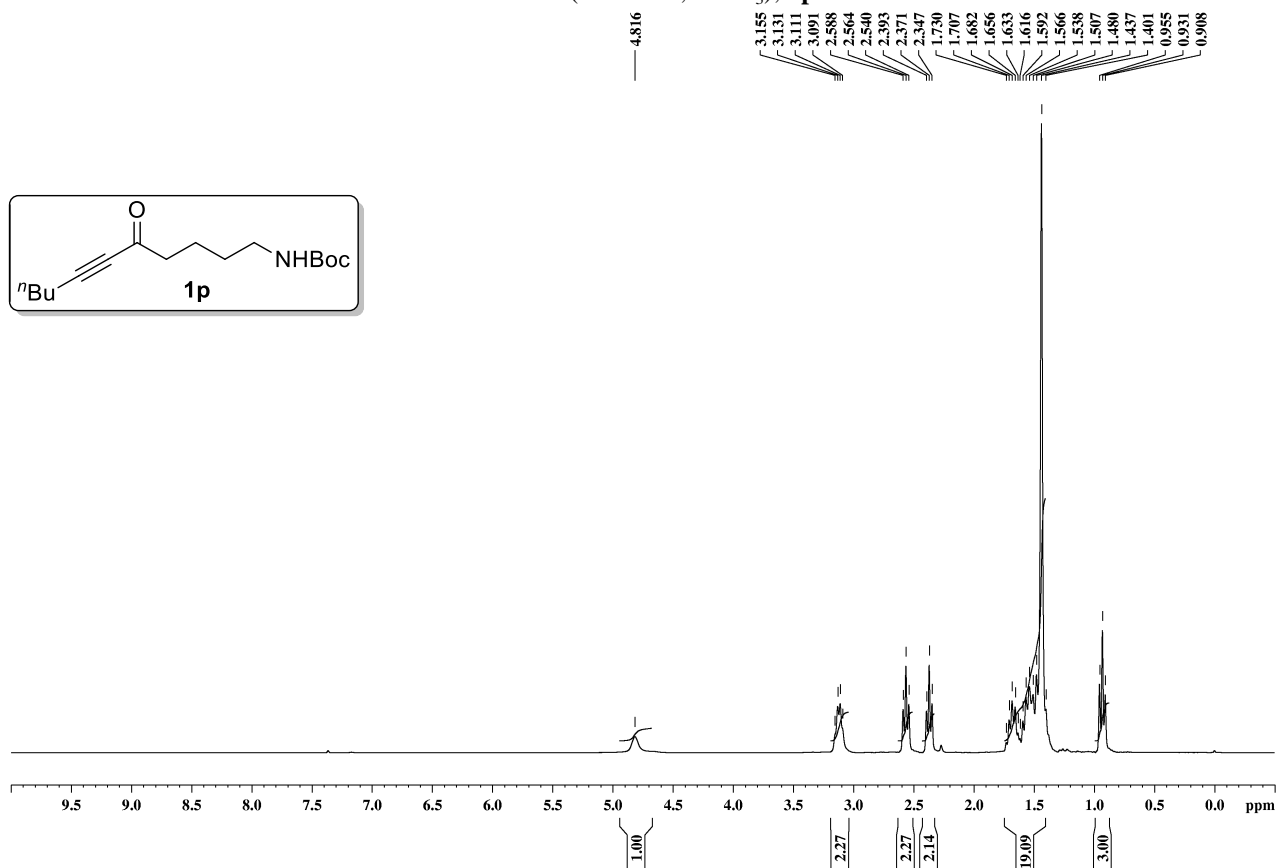

<sup>13</sup>C NMR (75 MHz, CDCl<sub>3</sub>); **1p**

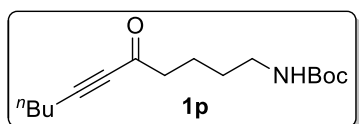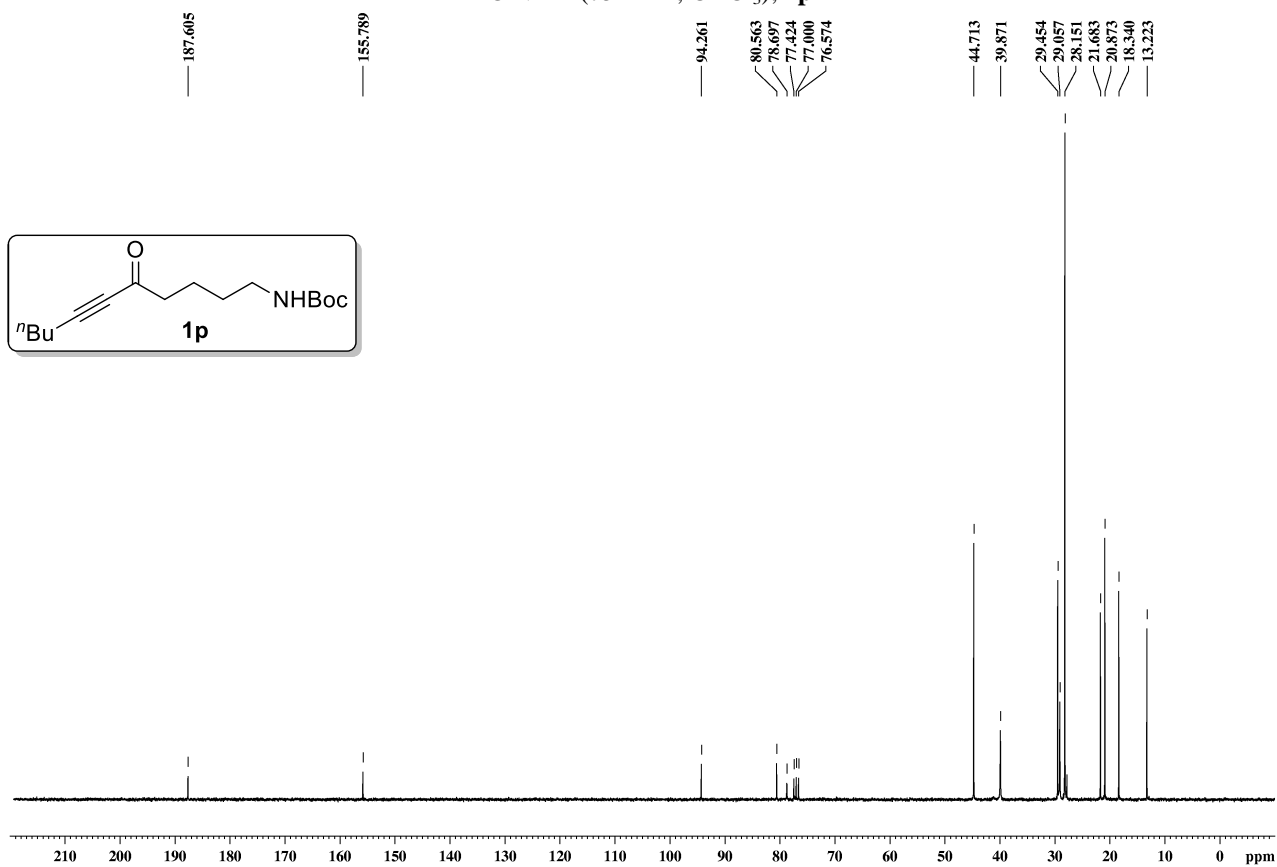

<sup>1</sup>H NMR (300 MHz, CDCl<sub>3</sub>); **1q**

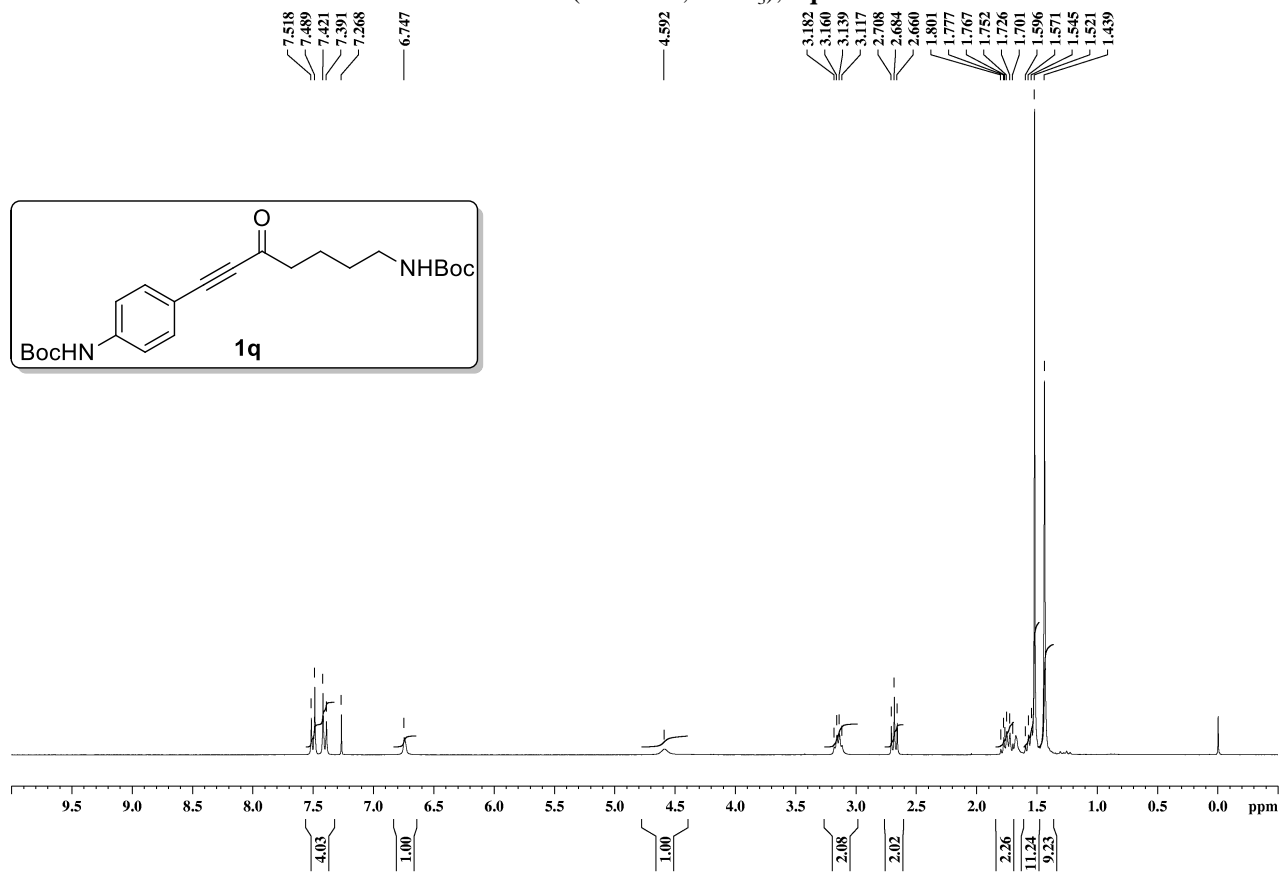

<sup>13</sup>C NMR (75 MHz, CDCl<sub>3</sub>); **1q**

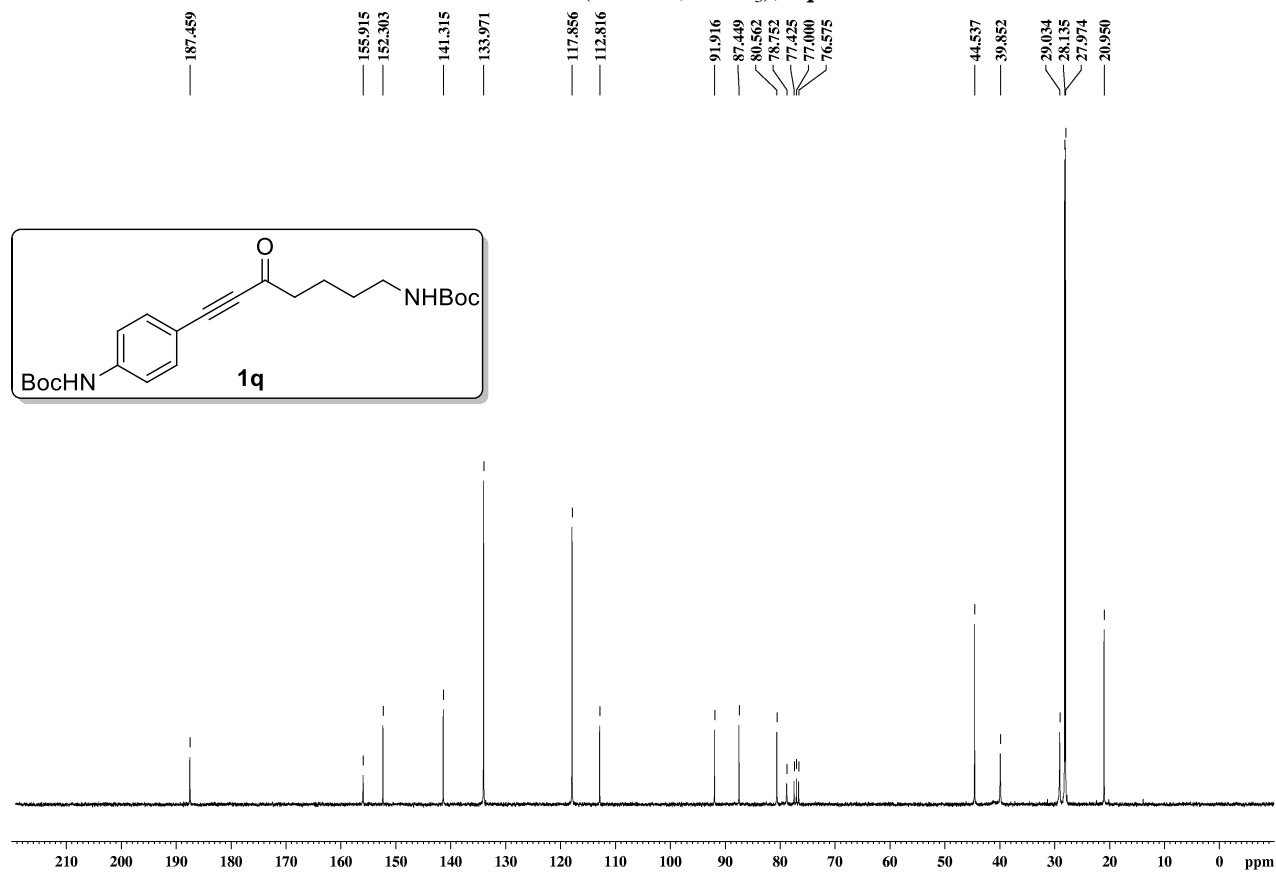

<sup>1</sup>H NMR (300 MHz, CDCl<sub>3</sub>); **3c**

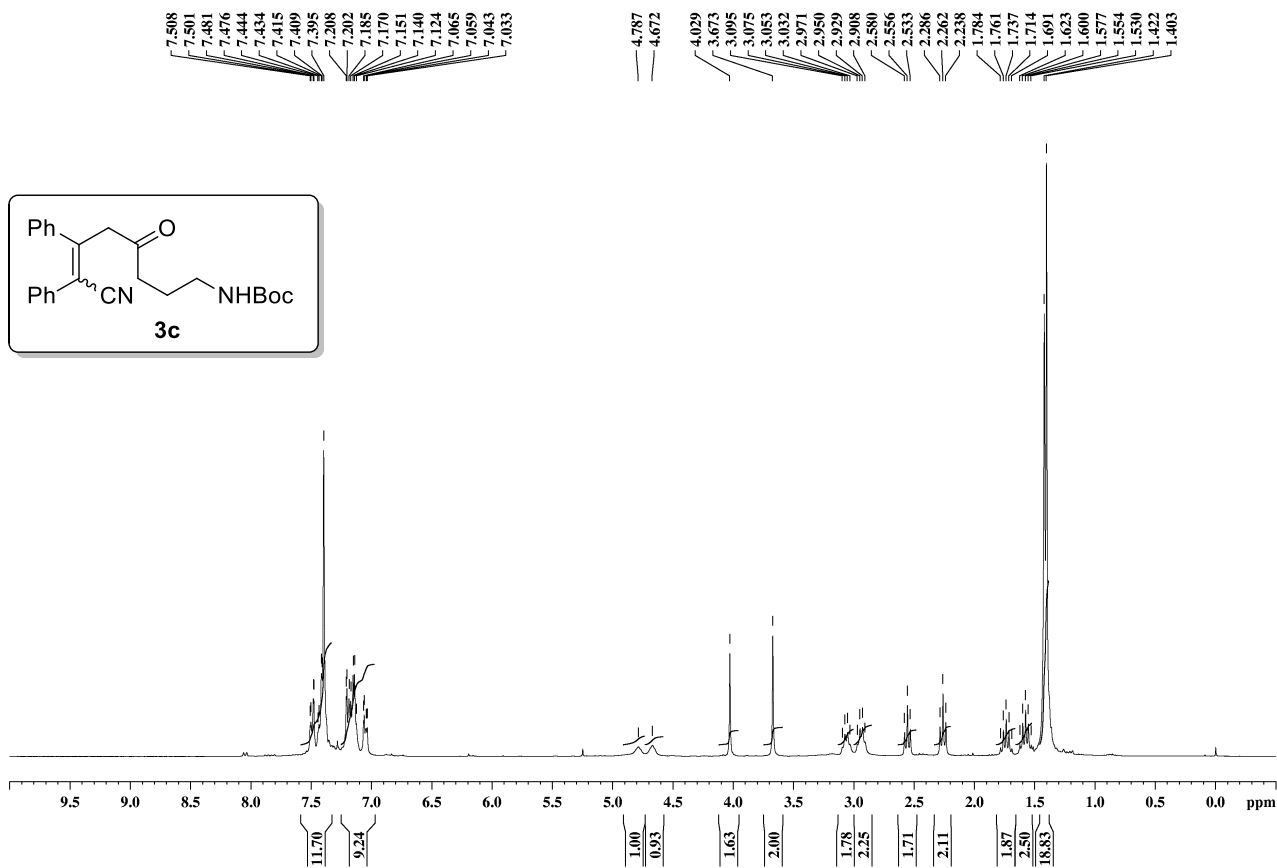

<sup>13</sup>C NMR (75 MHz, CDCl<sub>3</sub>); **3c**

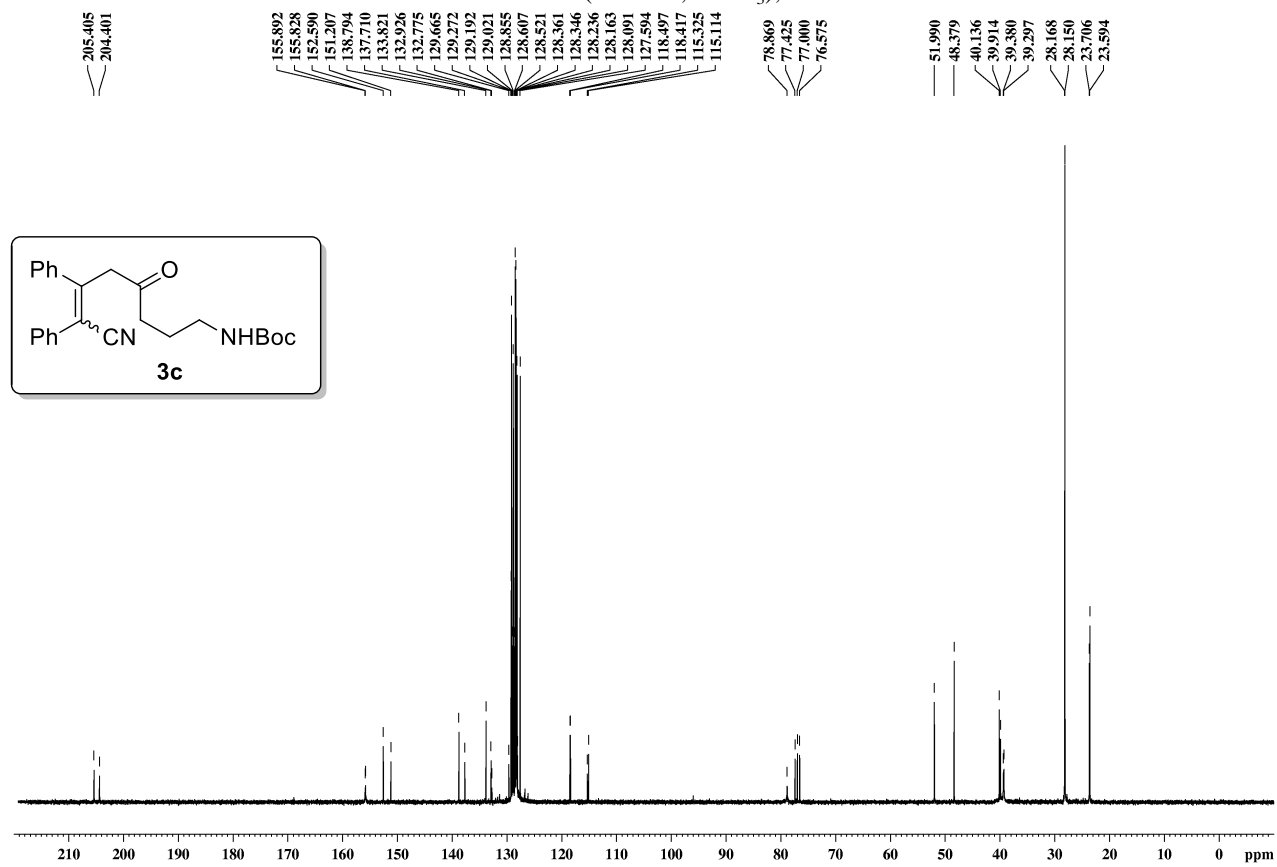

<sup>1</sup>H NMR (300 MHz, CDCl<sub>3</sub>); **3d**

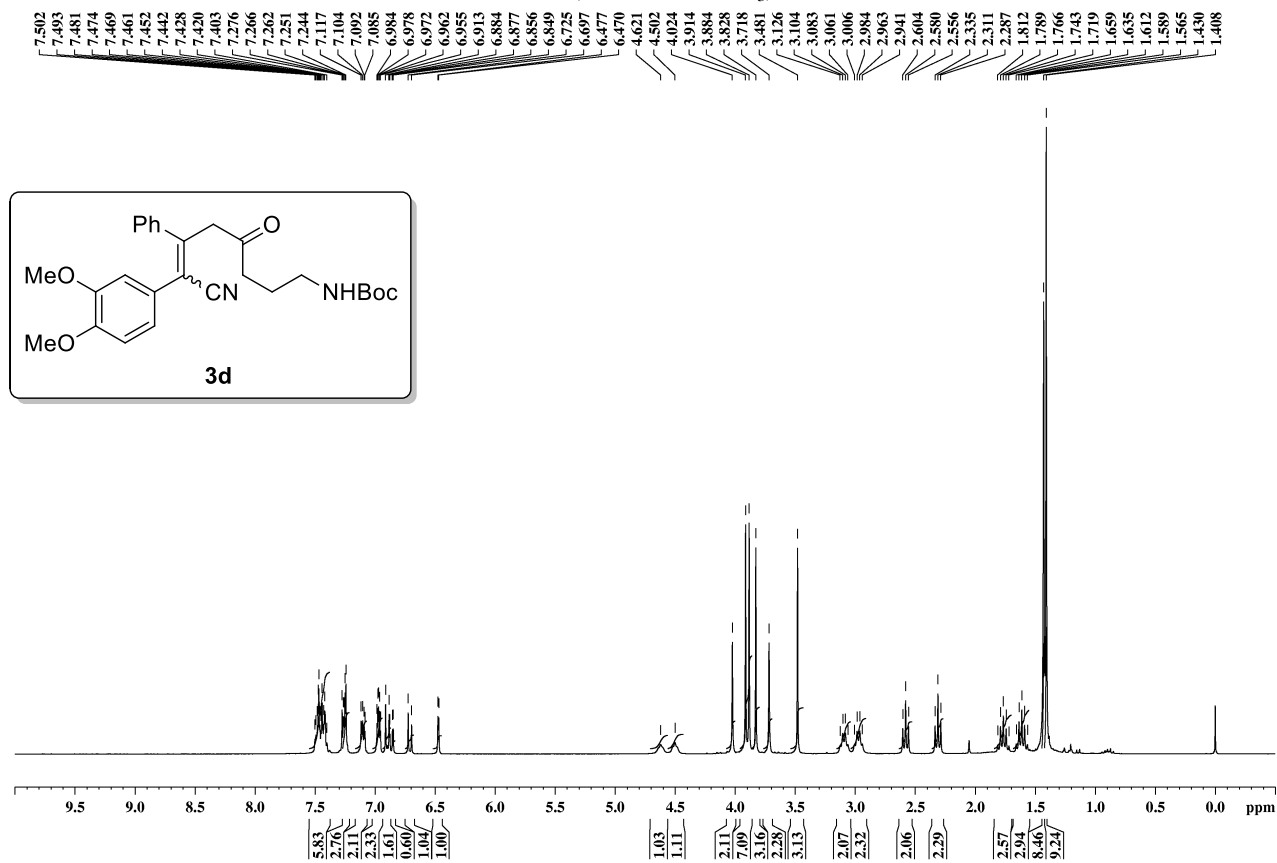

<sup>13</sup>C NMR (75 MHz, CDCl<sub>3</sub>); **3d**

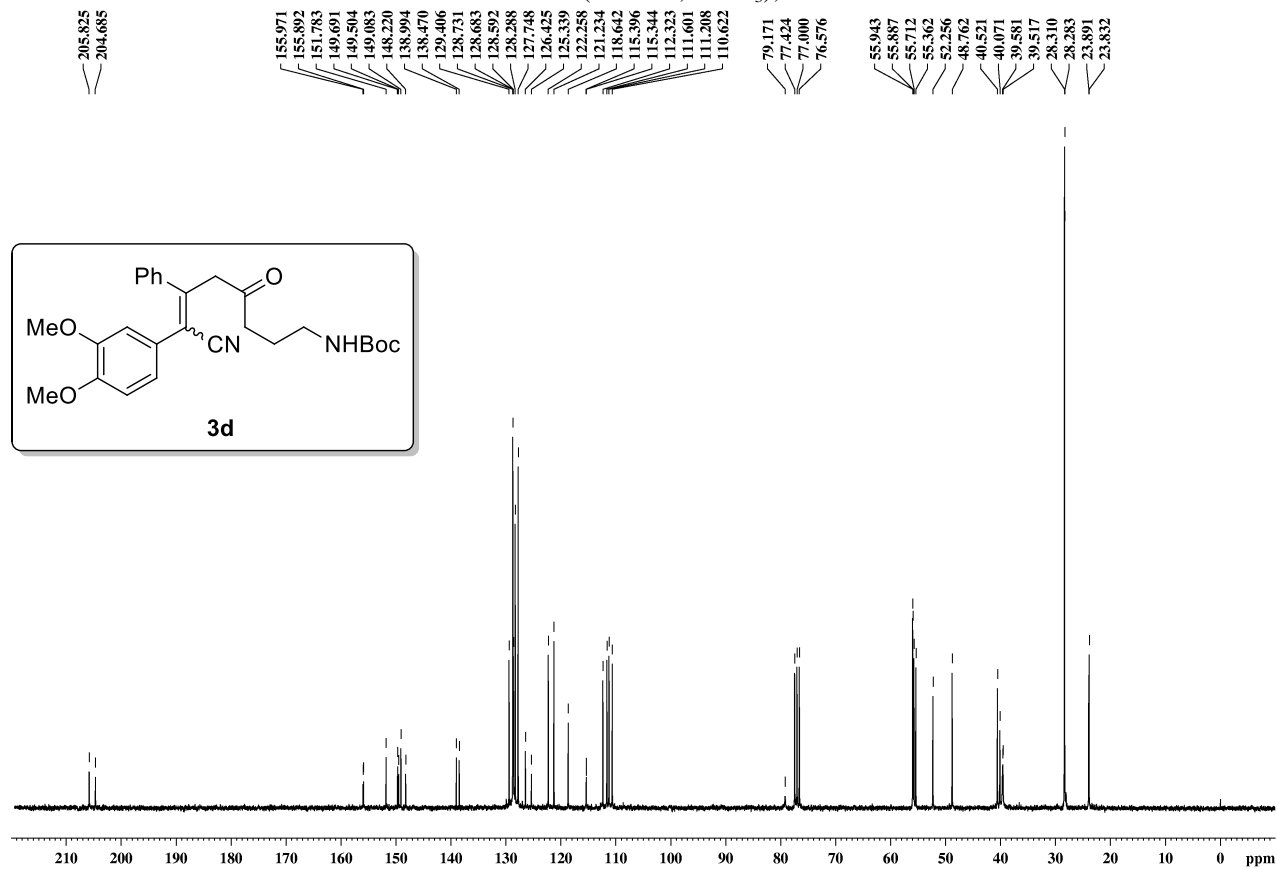

<sup>1</sup>H NMR (300 MHz, CDCl<sub>3</sub>); **3e**

7.491, 7.479, 7.464, 7.457, 7.439, 7.424, 7.419, 7.406, 7.400, 7.390, 7.371, 7.342, 7.243, 7.237, 7.228, 7.220, 7.208, 7.156, 7.128, 7.075, 7.059, 7.053, 7.046, 7.028, 4.777, 4.760, 4.742, 4.666, 4.648, 4.631, 4.028, 3.669, 3.106, 3.085, 3.064, 3.043, 2.997, 2.975, 2.954, 2.935, 2.588, 2.564, 2.541, 2.322, 2.298, 2.274, 1.793, 1.770, 1.747, 1.724, 1.701, 1.642, 1.619, 1.596, 1.573, 1.550, 1.423, 1.405

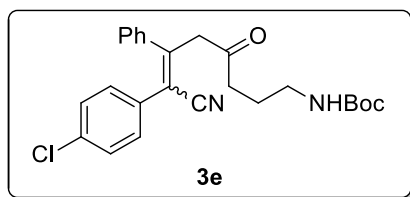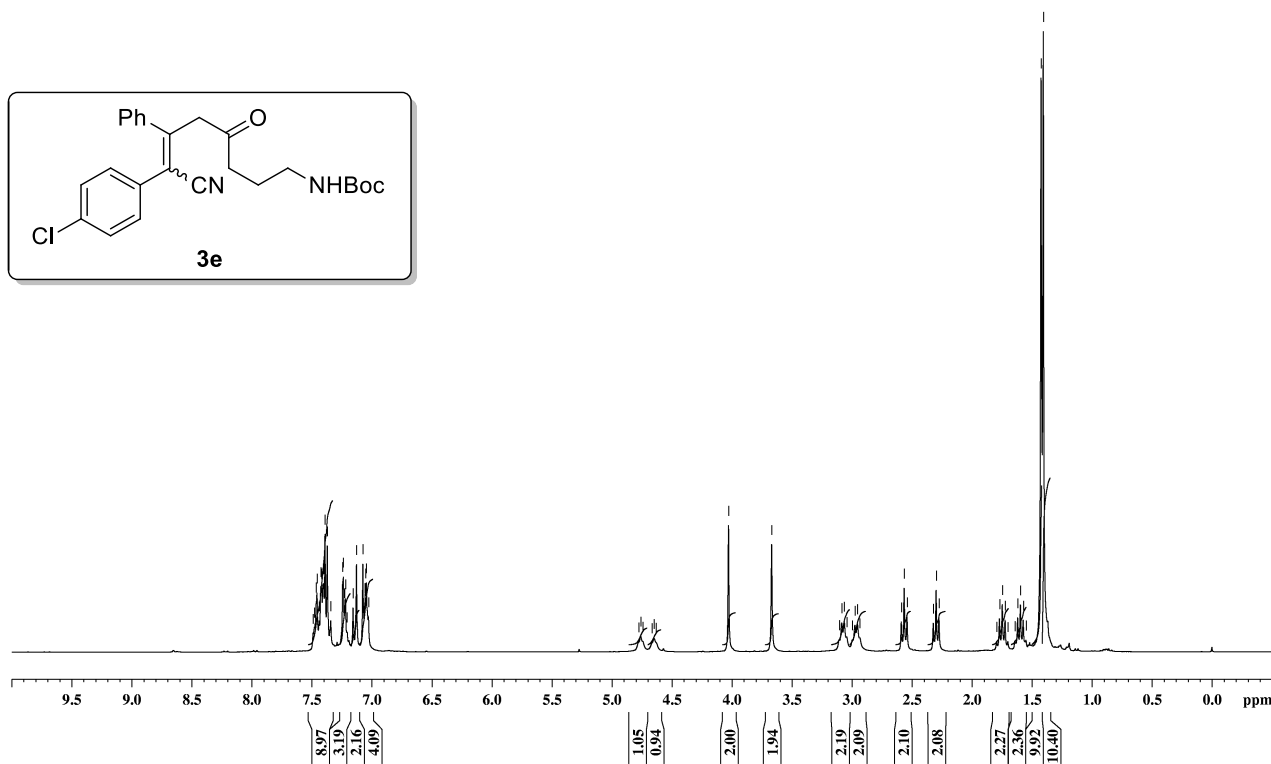

<sup>13</sup>C NMR (75 MHz, CDCl<sub>3</sub>); **3e**

205.276, 204.240, 155.937, 155.891, 155.166, 151.993, 138.596, 137.496, 135.186, 134.268, 132.251, 131.484, 130.564, 129.879, 129.485, 129.146, 128.879, 128.629, 128.577, 128.470, 128.150, 127.565, 118.146, 118.105, 114.255, 114.168, 78.981, 77.425, 77.000, 76.575, 52.046, 48.410, 40.273, 40.027, 39.404, 39.267, 28.203, 28.175, 23.778, 23.687

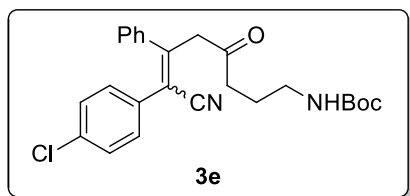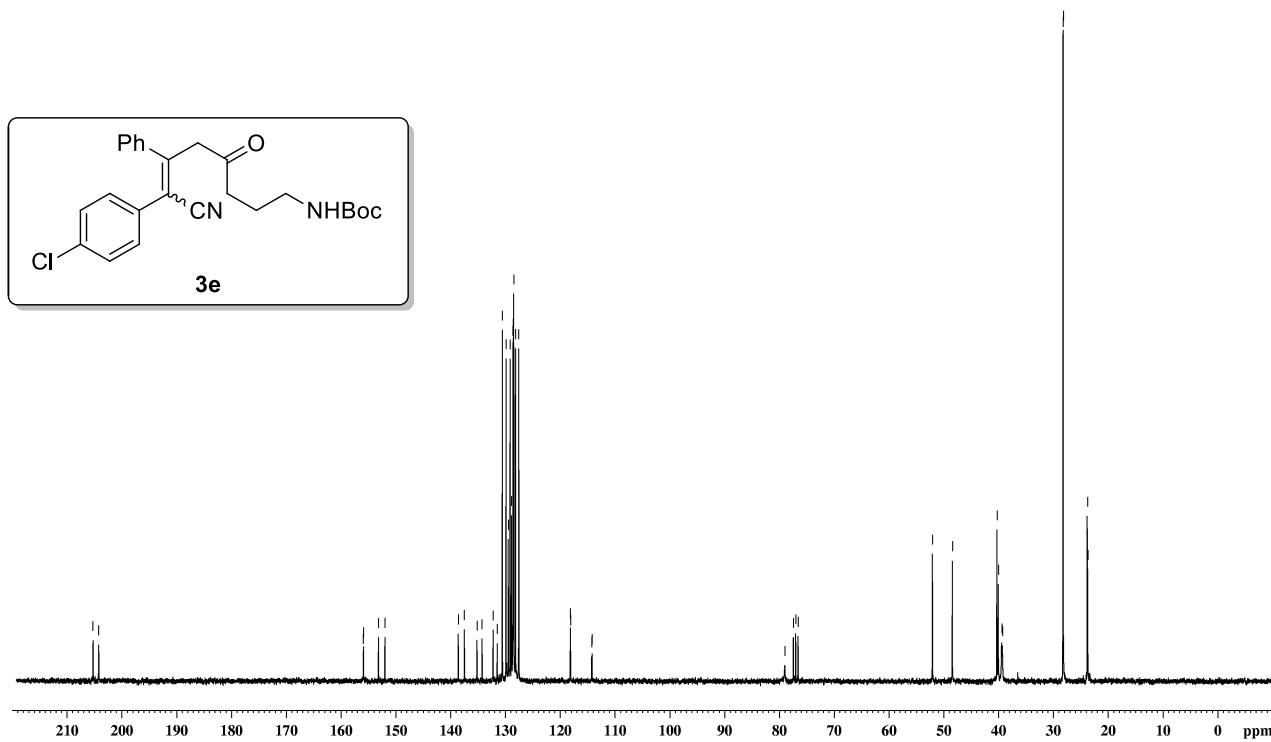



<sup>1</sup>H NMR (300 MHz, CDCl<sub>3</sub>); **3f**

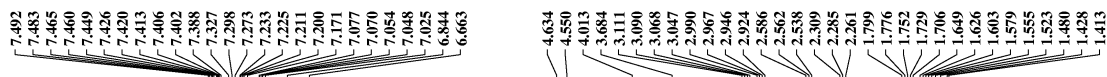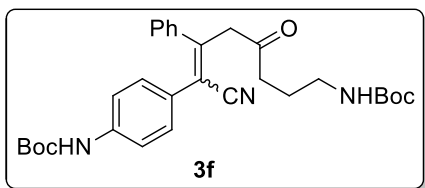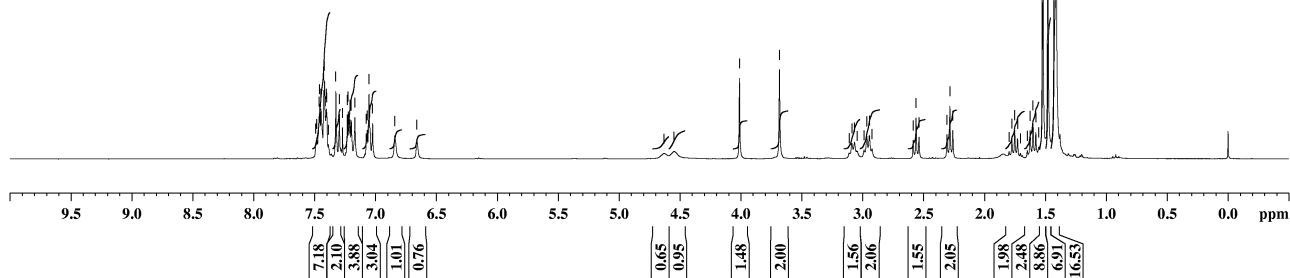

<sup>13</sup>C NMR (75 MHz, CDCl<sub>3</sub>); **3f**

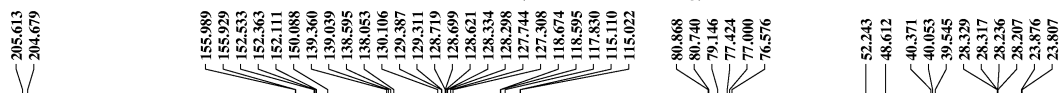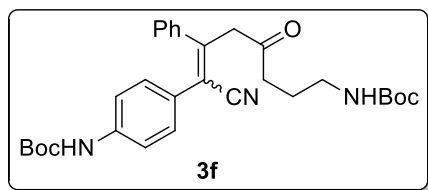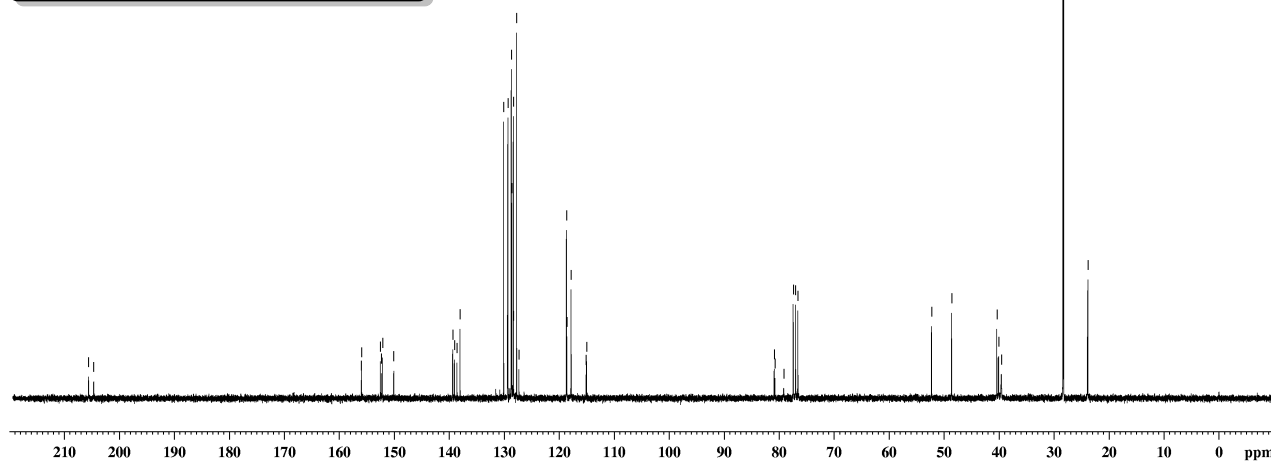

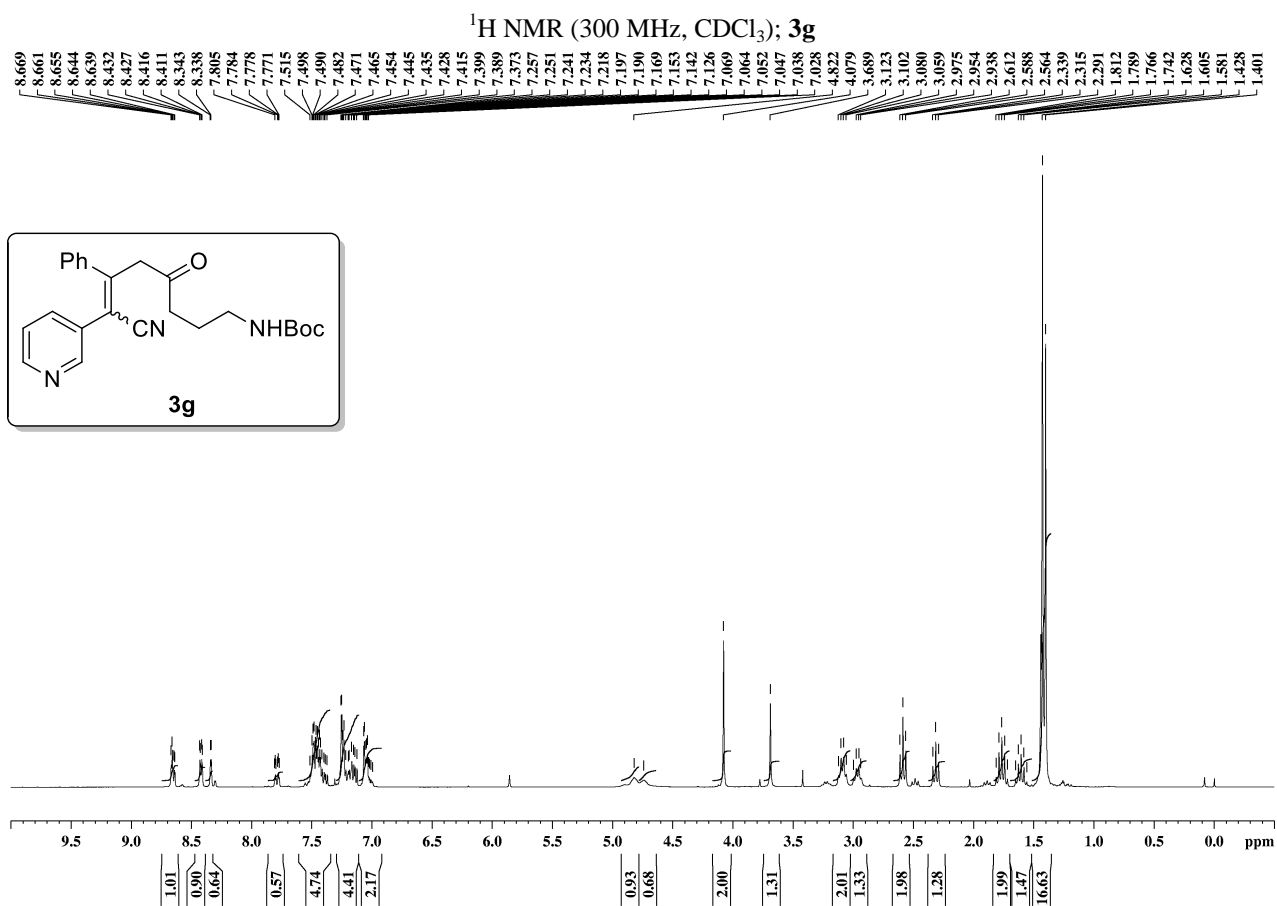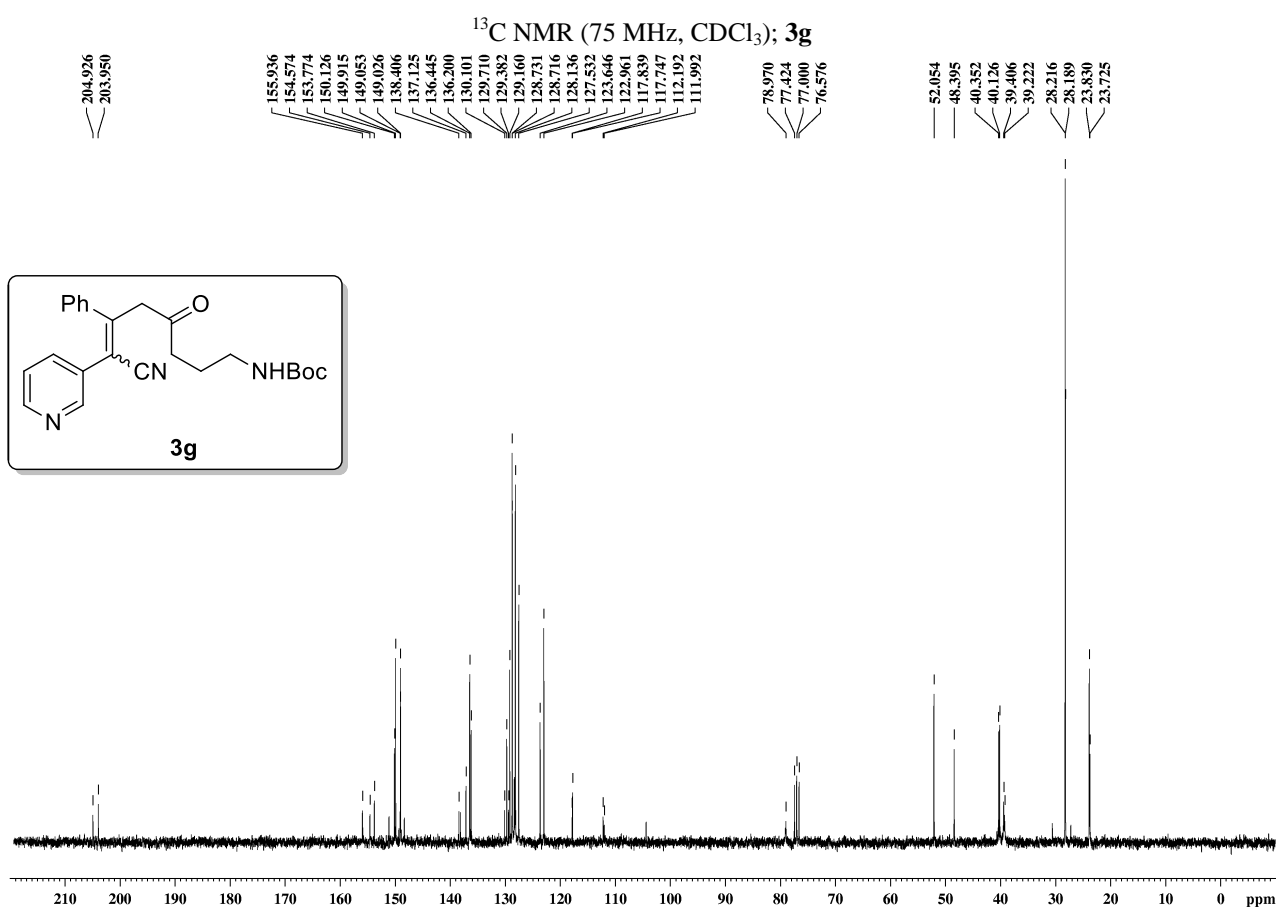

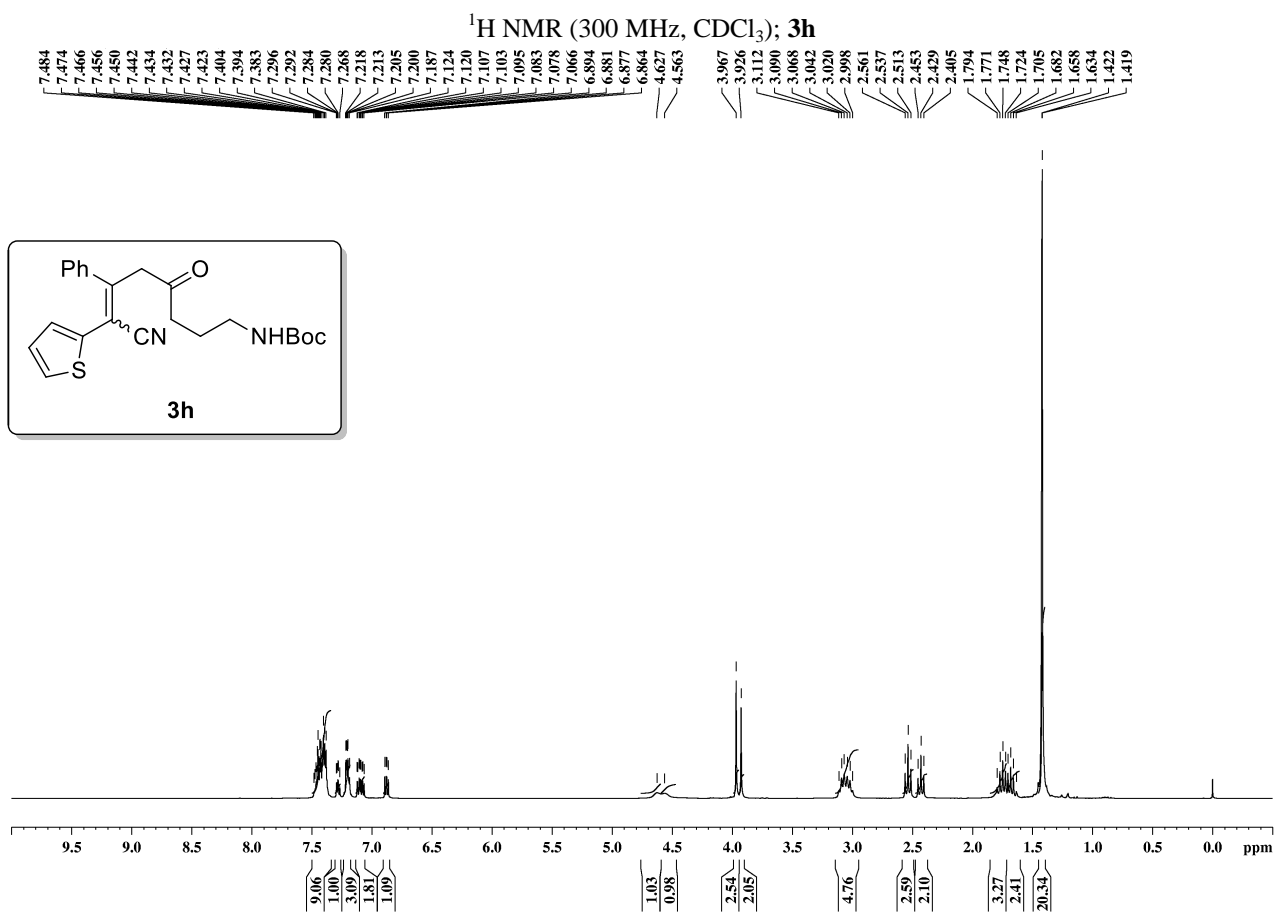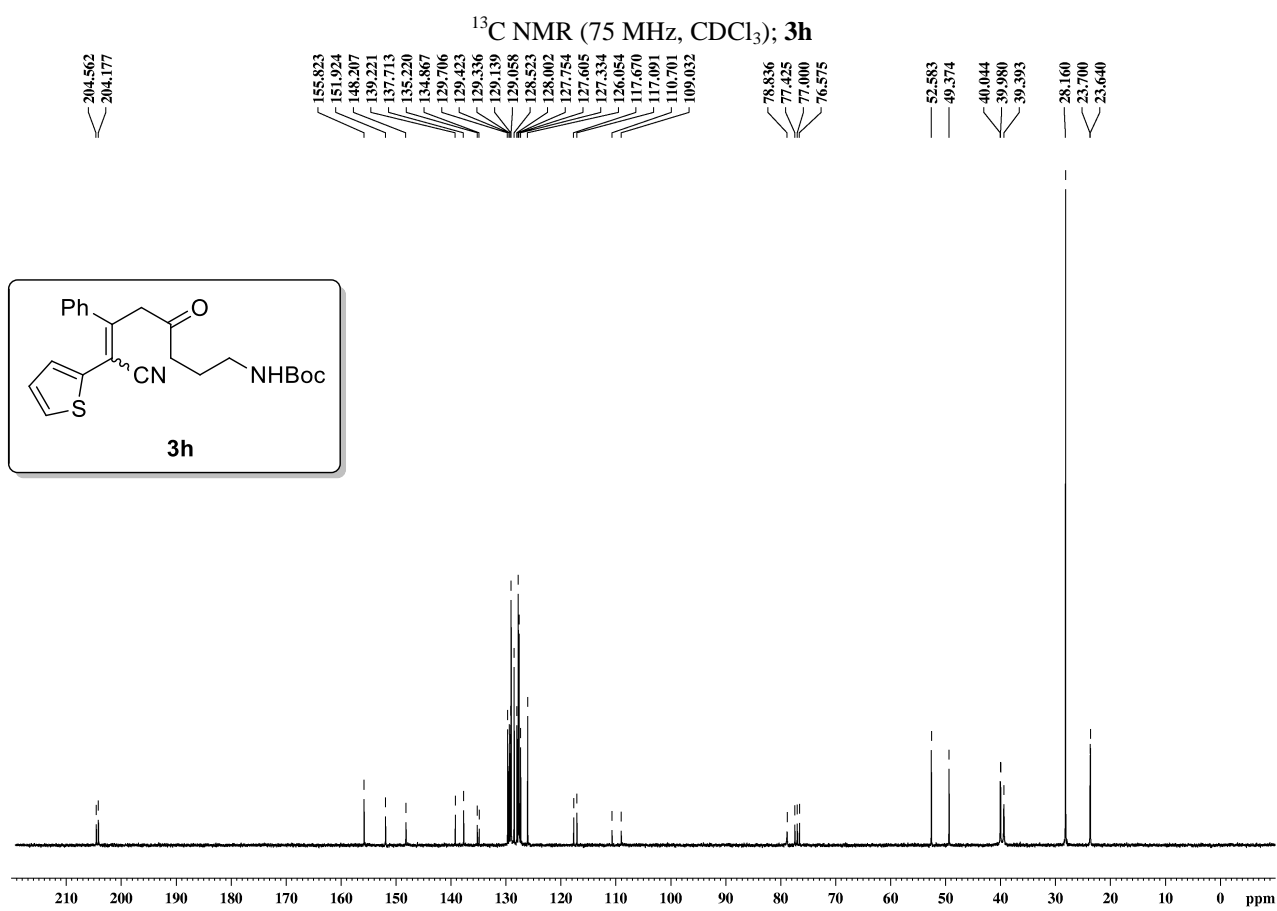

<sup>1</sup>H NMR (300 MHz, CDCl<sub>3</sub>); **3i**

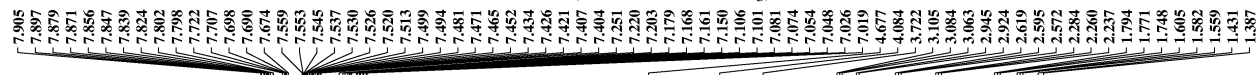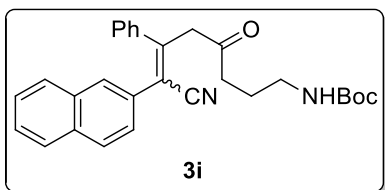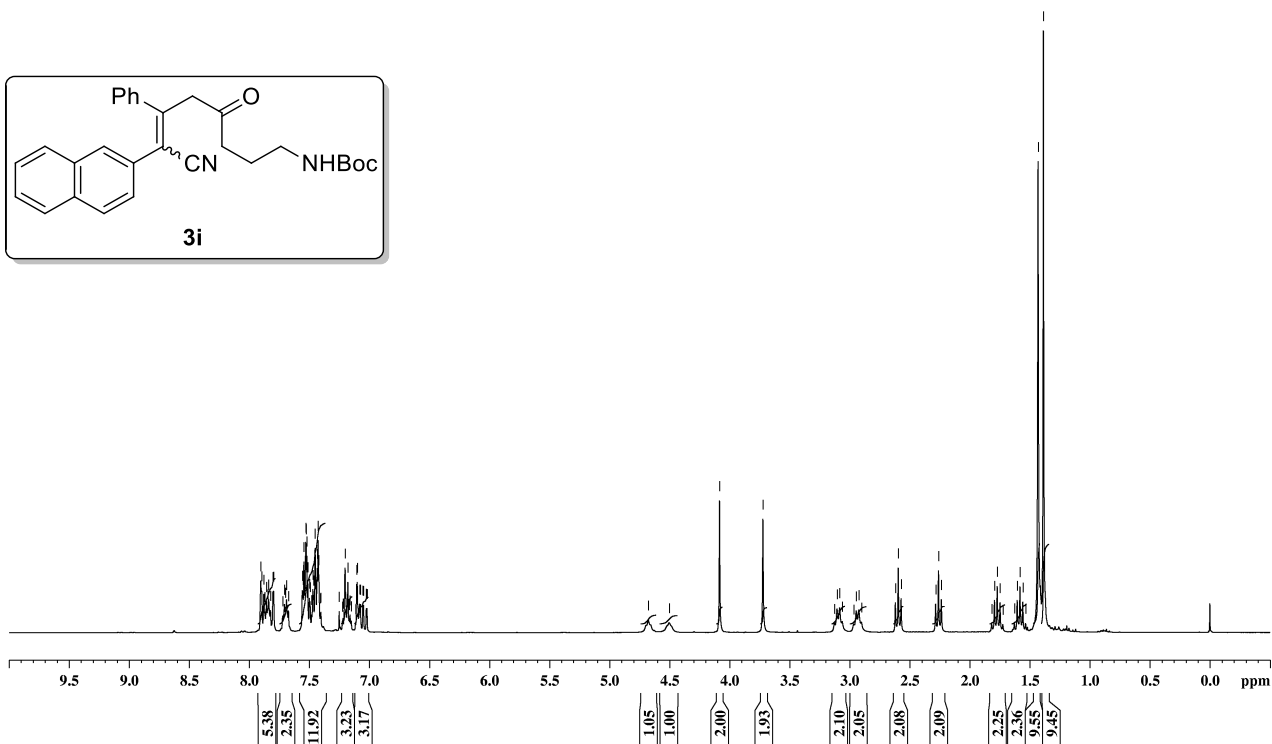

<sup>13</sup>C NMR (75 MHz, CDCl<sub>3</sub>); **3i**

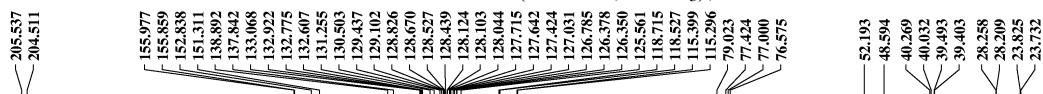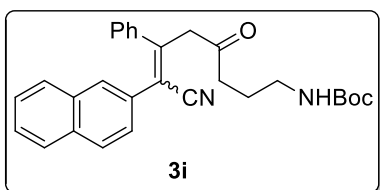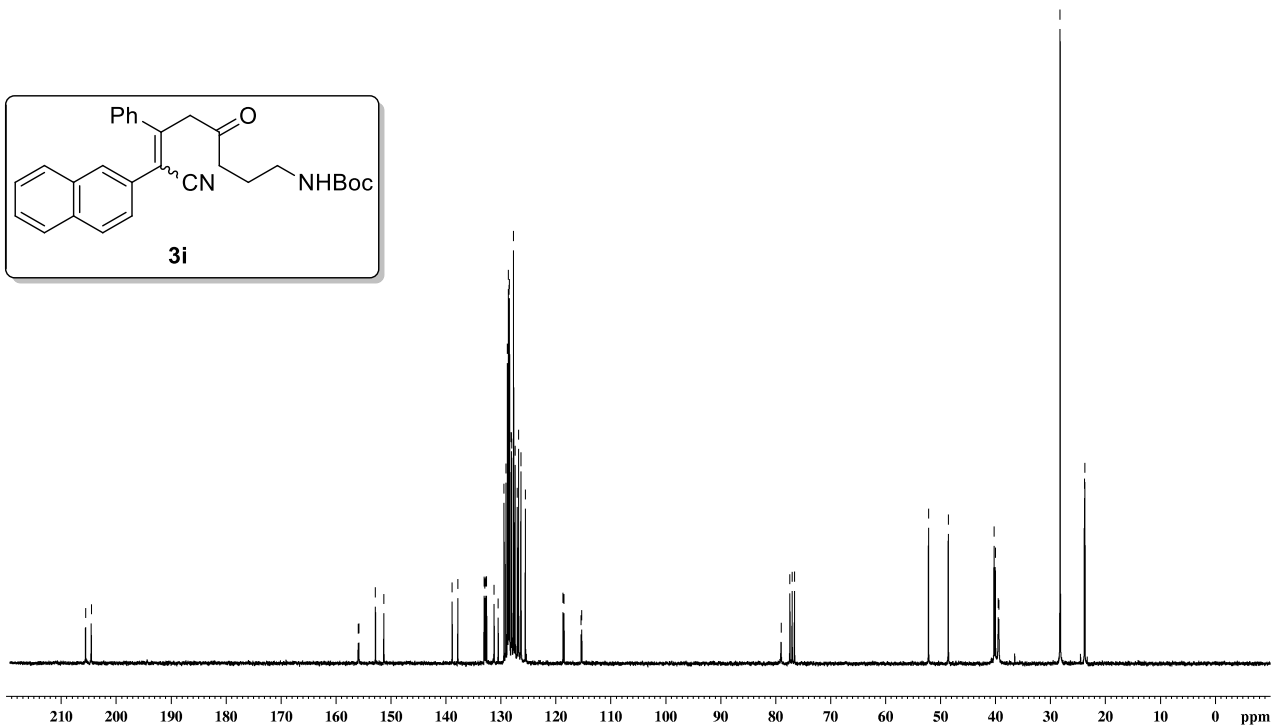

<sup>1</sup>H NMR (300 MHz, CDCl<sub>3</sub>); **3j**

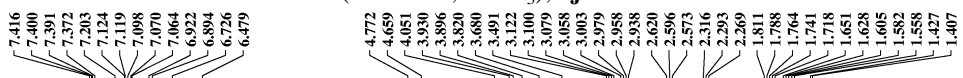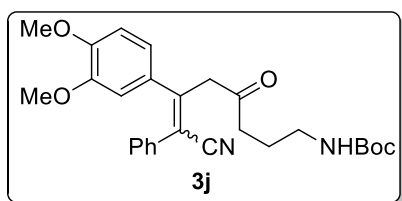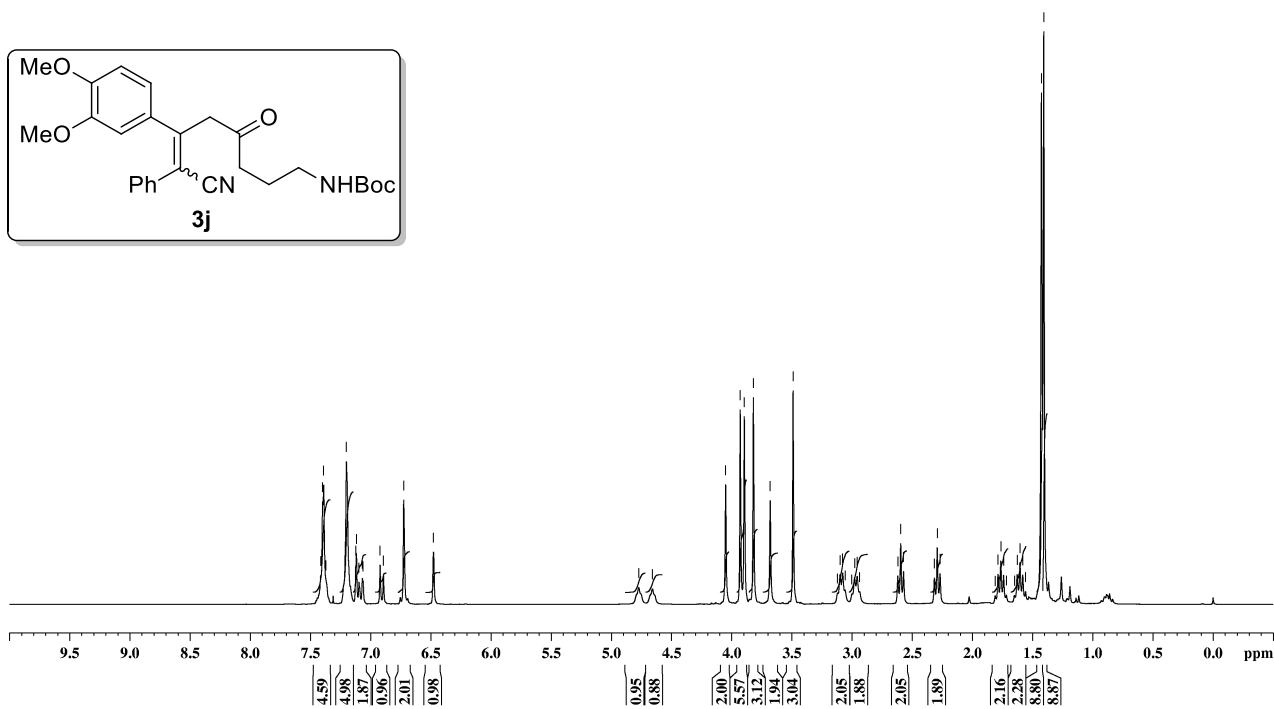

<sup>13</sup>C NMR (75 MHz, CDCl<sub>3</sub>); **3j**

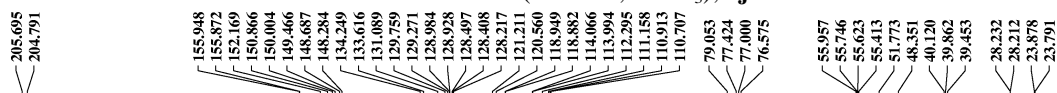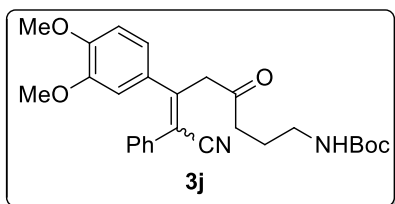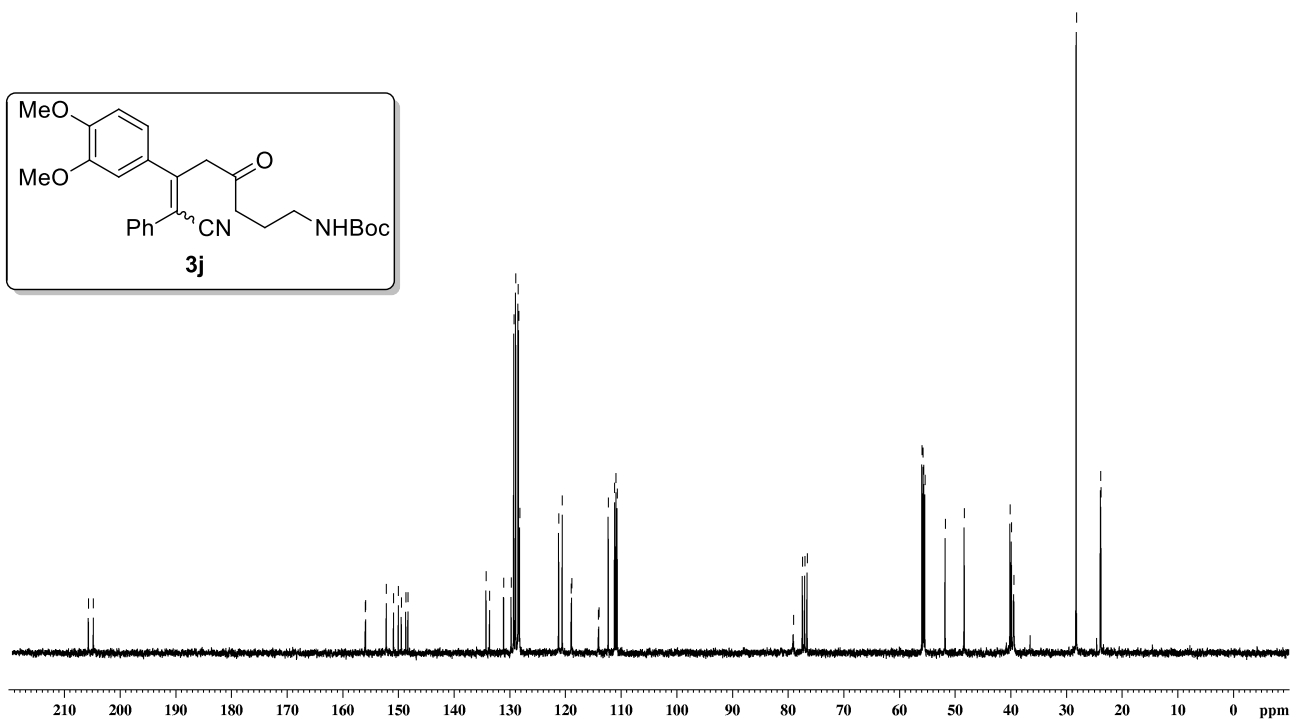

<sup>1</sup>H NMR (300 MHz, CDCl<sub>3</sub>); **3k**

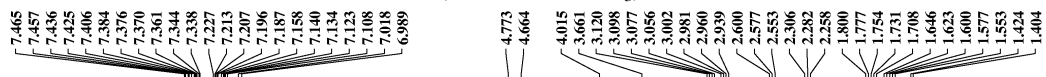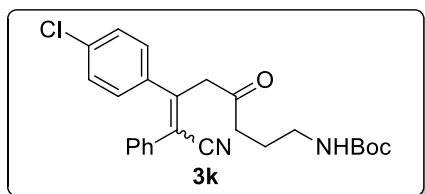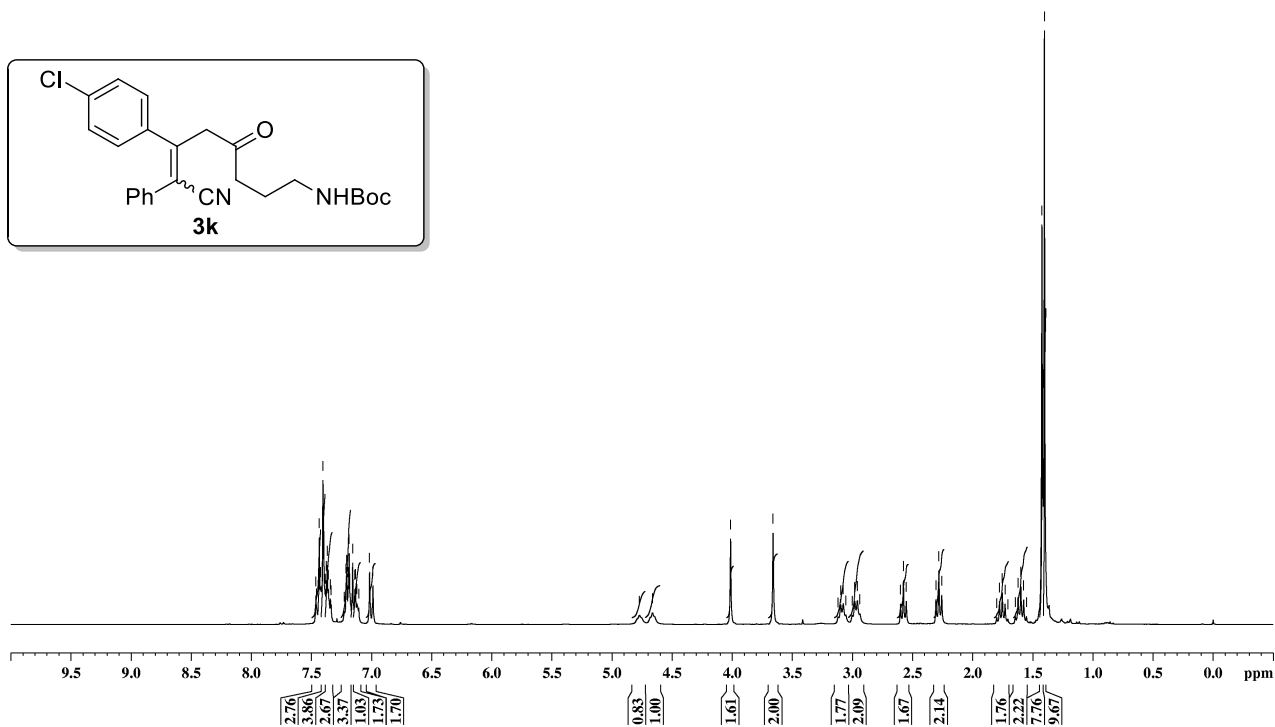

<sup>13</sup>C NMR (75 MHz, CDCl<sub>3</sub>); **3k**

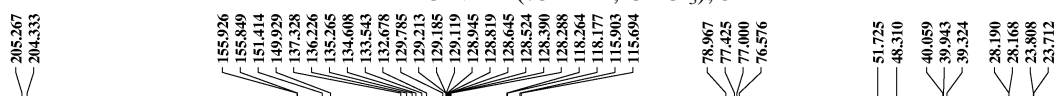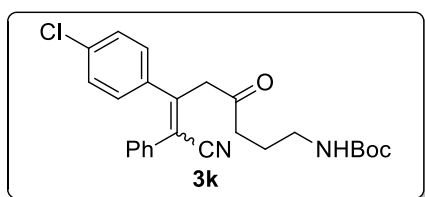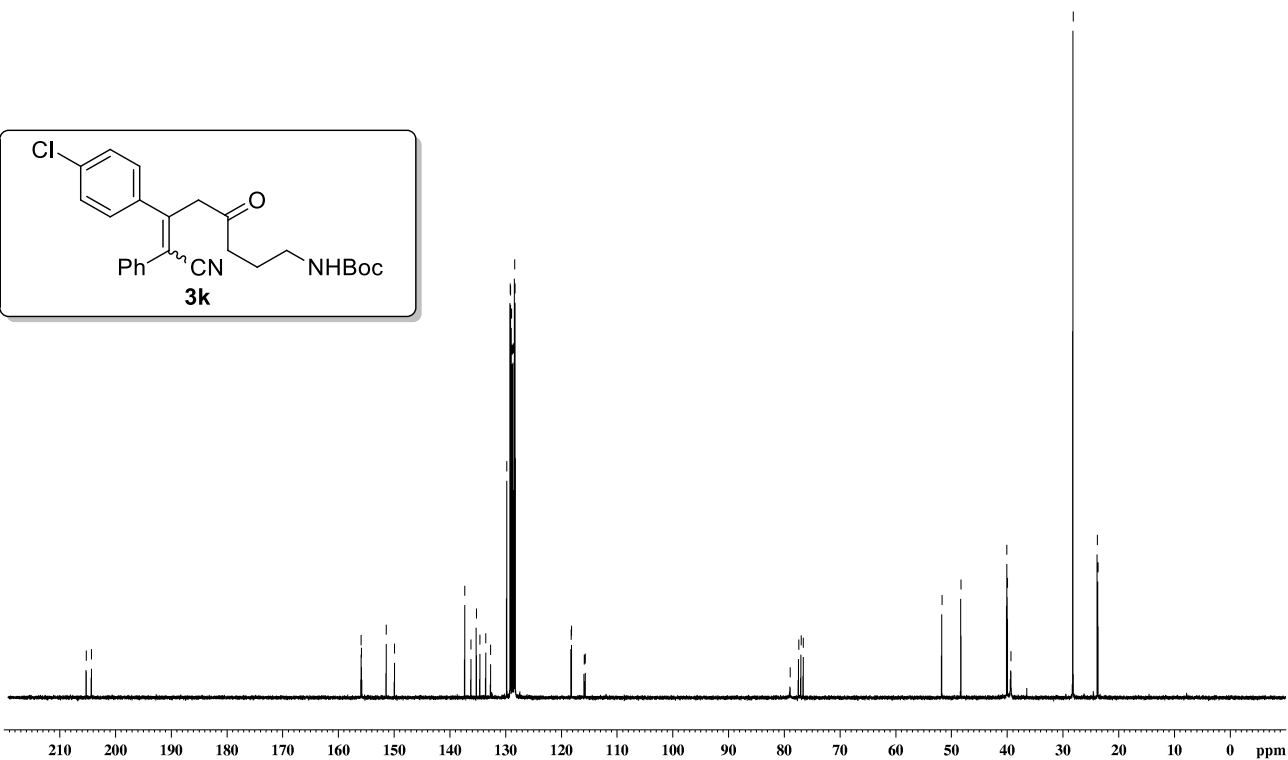

<sup>1</sup>H NMR (300 MHz, CDCl<sub>3</sub>); **3I**

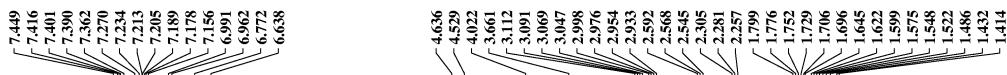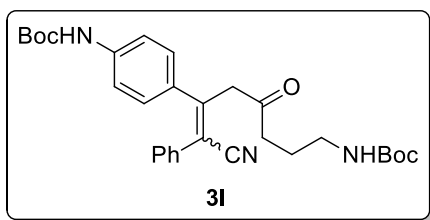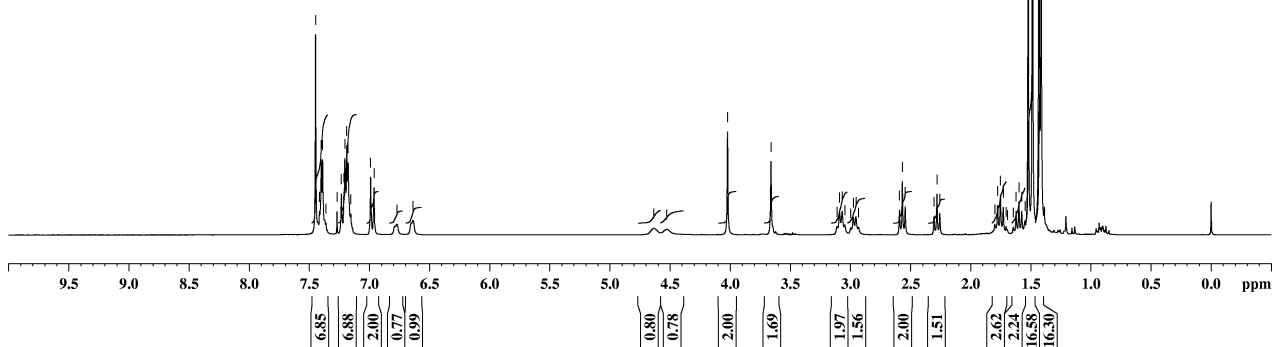

<sup>13</sup>C NMR (75 MHz, CDCl<sub>3</sub>); **3I**

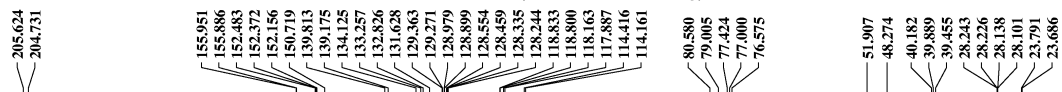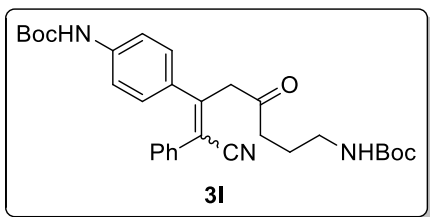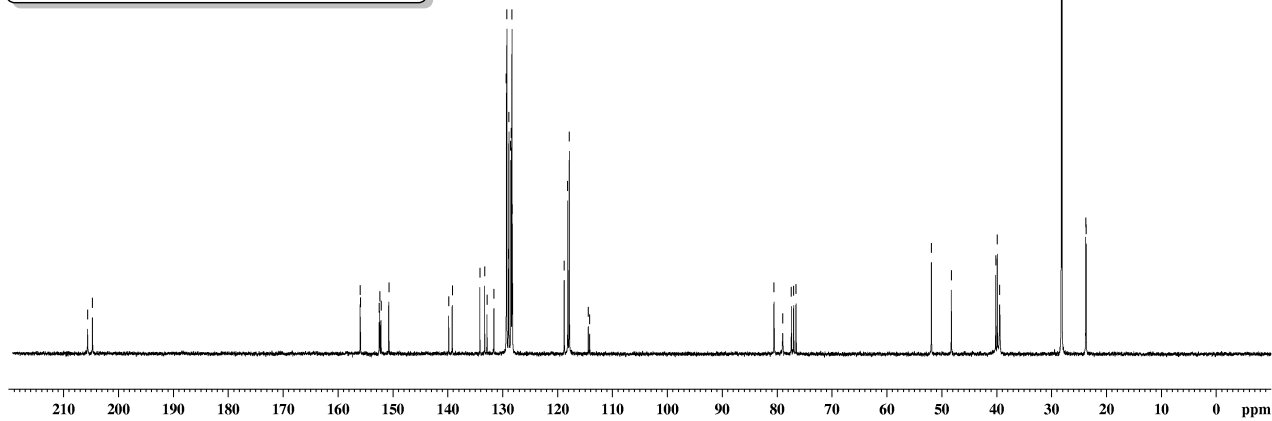

<sup>1</sup>H NMR (300 MHz, CDCl<sub>3</sub>); **3m**

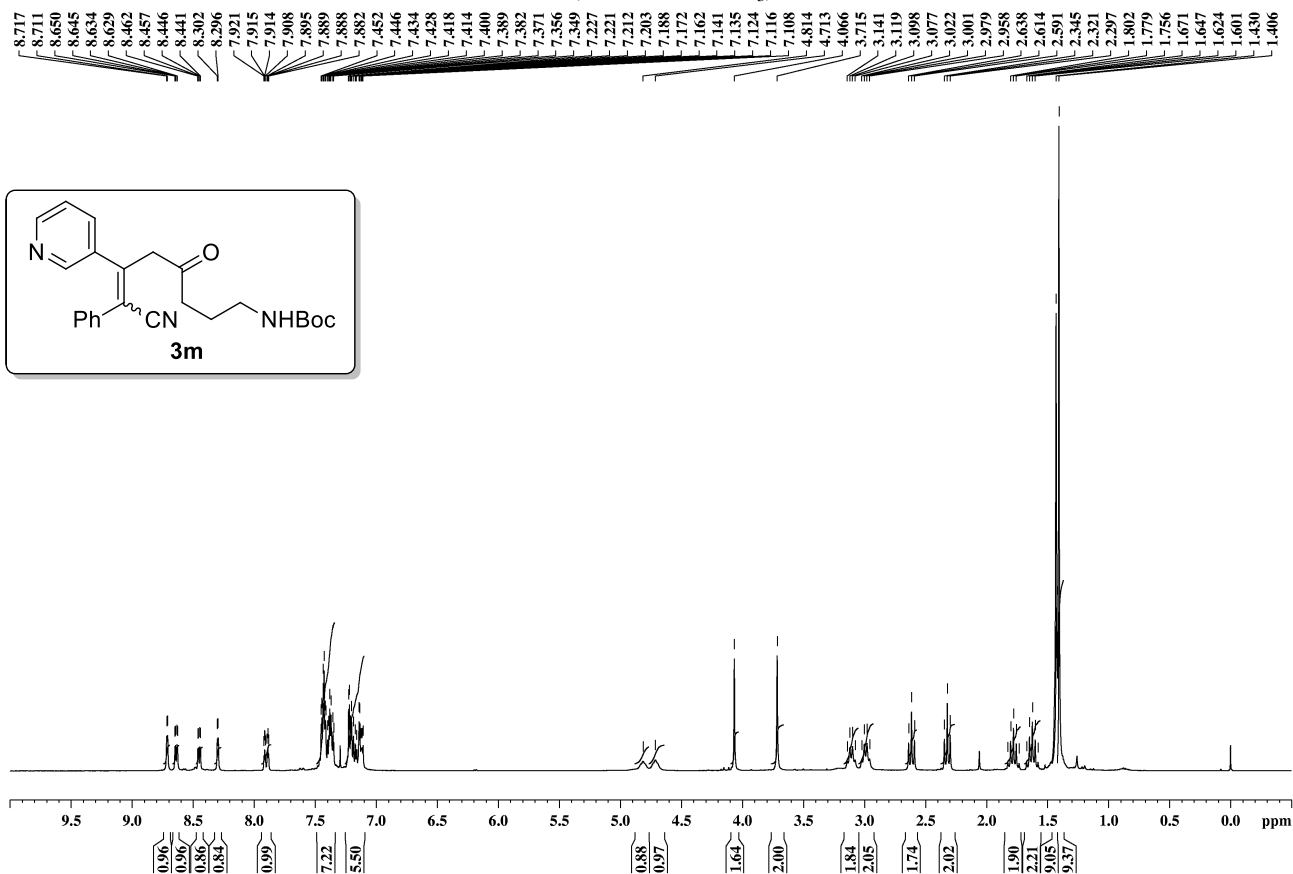

<sup>13</sup>C NMR (75 MHz, CDCl<sub>3</sub>); **3m**

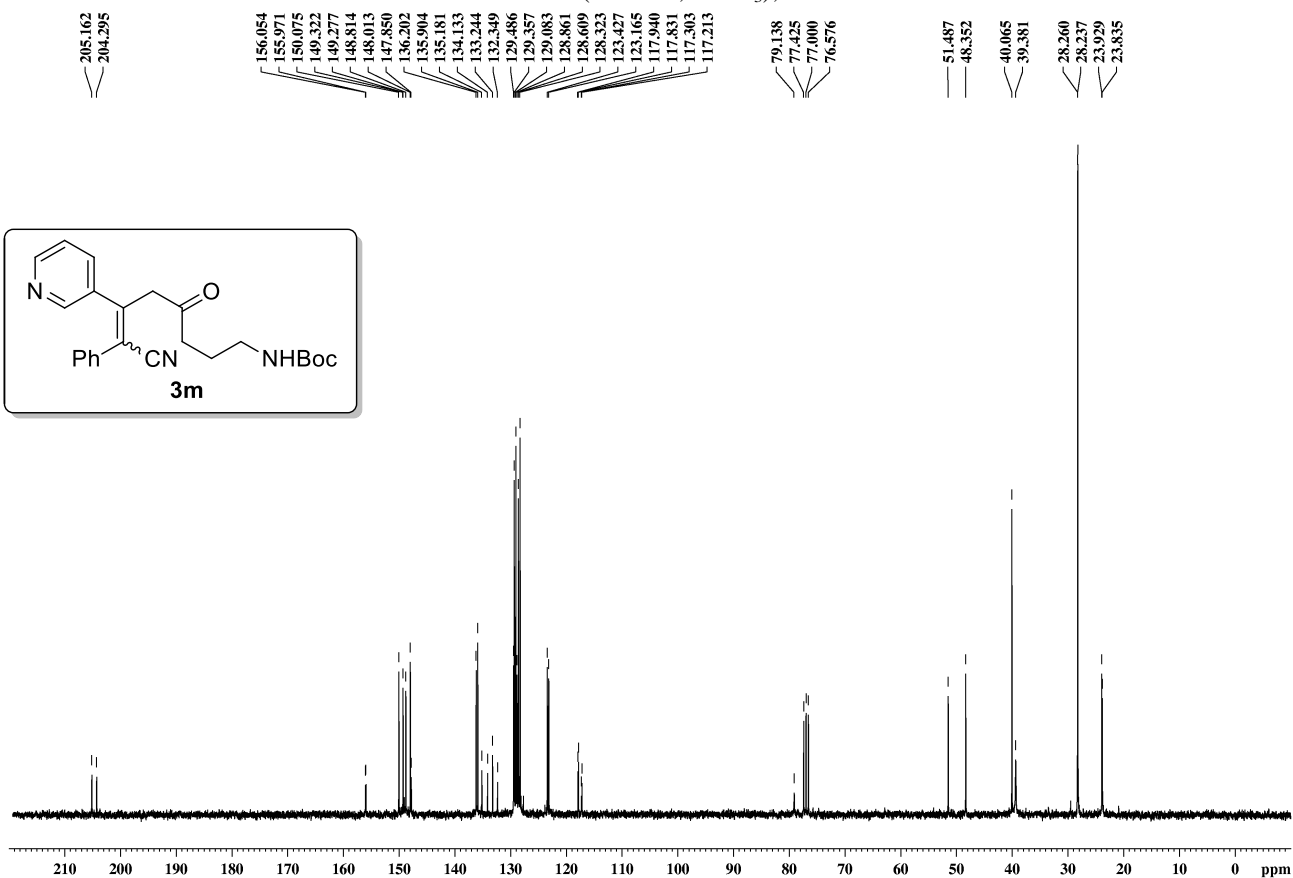



<sup>1</sup>H NMR (300 MHz, CDCl<sub>3</sub>); **3n**

7.714, 7.709, 7.446, 7.430, 7.408, 7.386, 7.371, 7.352, 7.345, 7.326, 7.321, 7.303, 7.282, 7.289, 7.257, 7.247, 7.227, 7.181, 7.085, 7.072, 7.068, 7.059, 6.577, 6.575, 6.560, 6.558, 4.859, 4.770, 4.026, 3.652, 3.119, 3.095, 3.074, 3.054, 3.009, 2.988, 2.967, 2.948, 2.621, 2.598, 2.574, 2.334, 2.311, 2.287, 1.804, 1.781, 1.788, 1.735, 1.712, 1.661, 1.638, 1.615, 1.592, 1.569, 1.428, 1.413

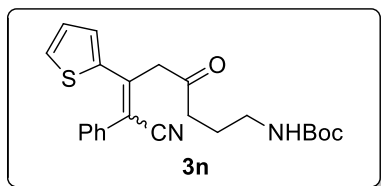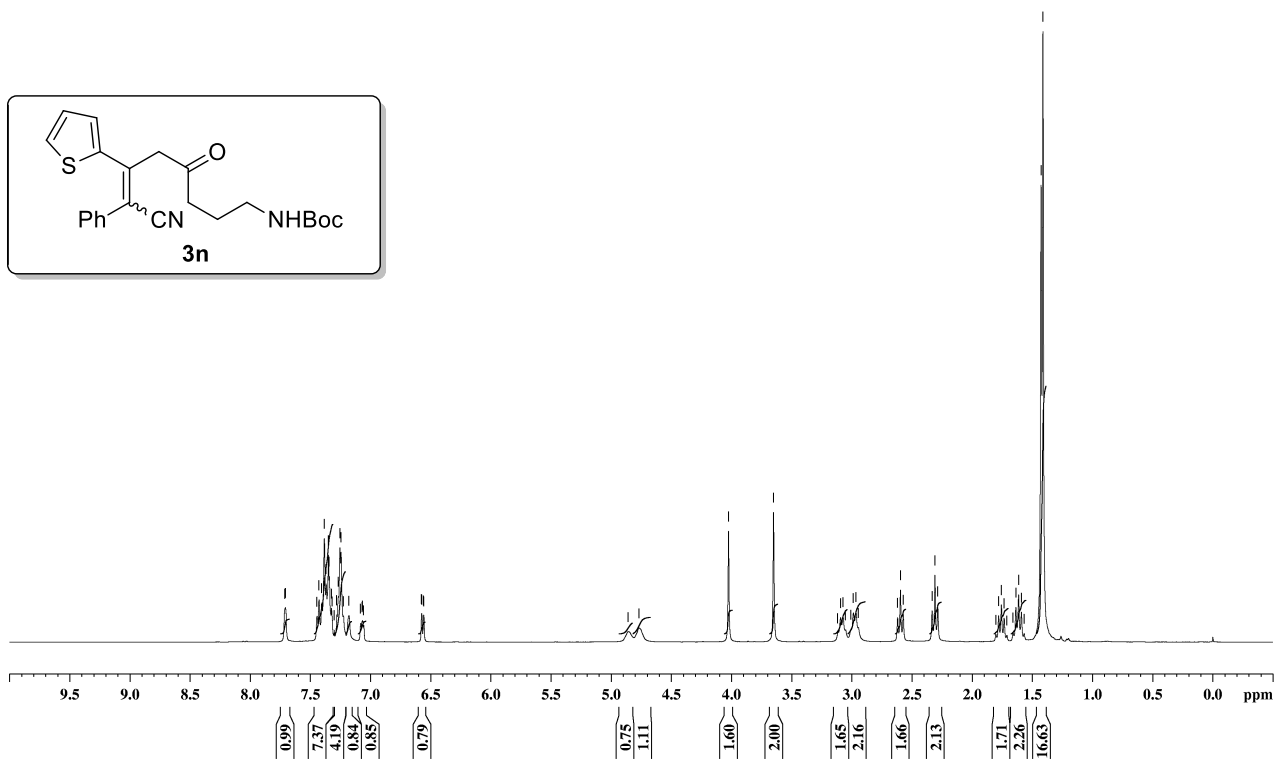

<sup>13</sup>C NMR (75 MHz, CDCl<sub>3</sub>); **3n**

205.553, 204.706, 155.878, 155.810, 145.984, 145.248, 138.748, 137.896, 134.031, 133.440, 128.977, 128.917, 128.835, 128.591, 128.466, 128.360, 127.458, 126.833, 126.733, 126.310, 126.158, 125.515, 118.998, 118.651, 113.919, 112.590, 78.811, 77.425, 77.000, 76.573, 51.545, 48.053, 39.686, 39.482, 39.254, 28.136, 28.124, 23.722, 23.633

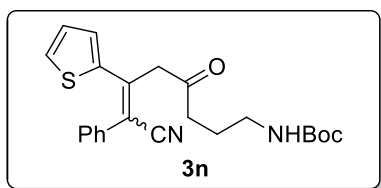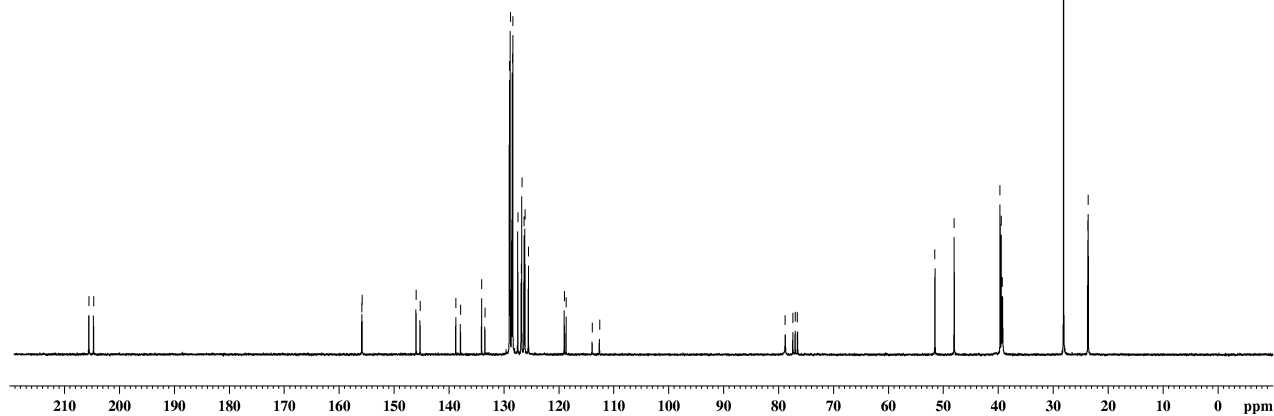

<sup>1</sup>H NMR (300 MHz, CDCl<sub>3</sub>); **3o**

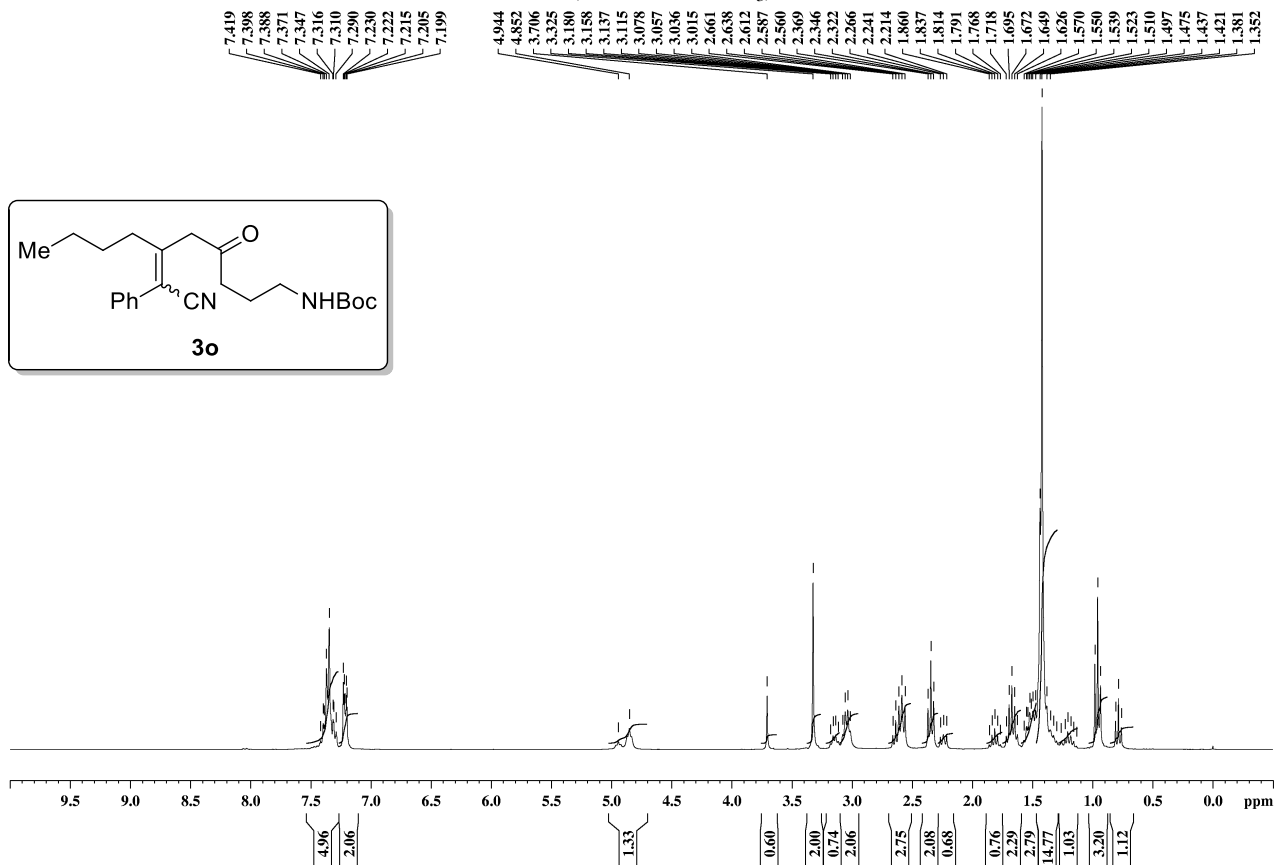

<sup>13</sup>C NMR (75 MHz, CDCl<sub>3</sub>); **3o**

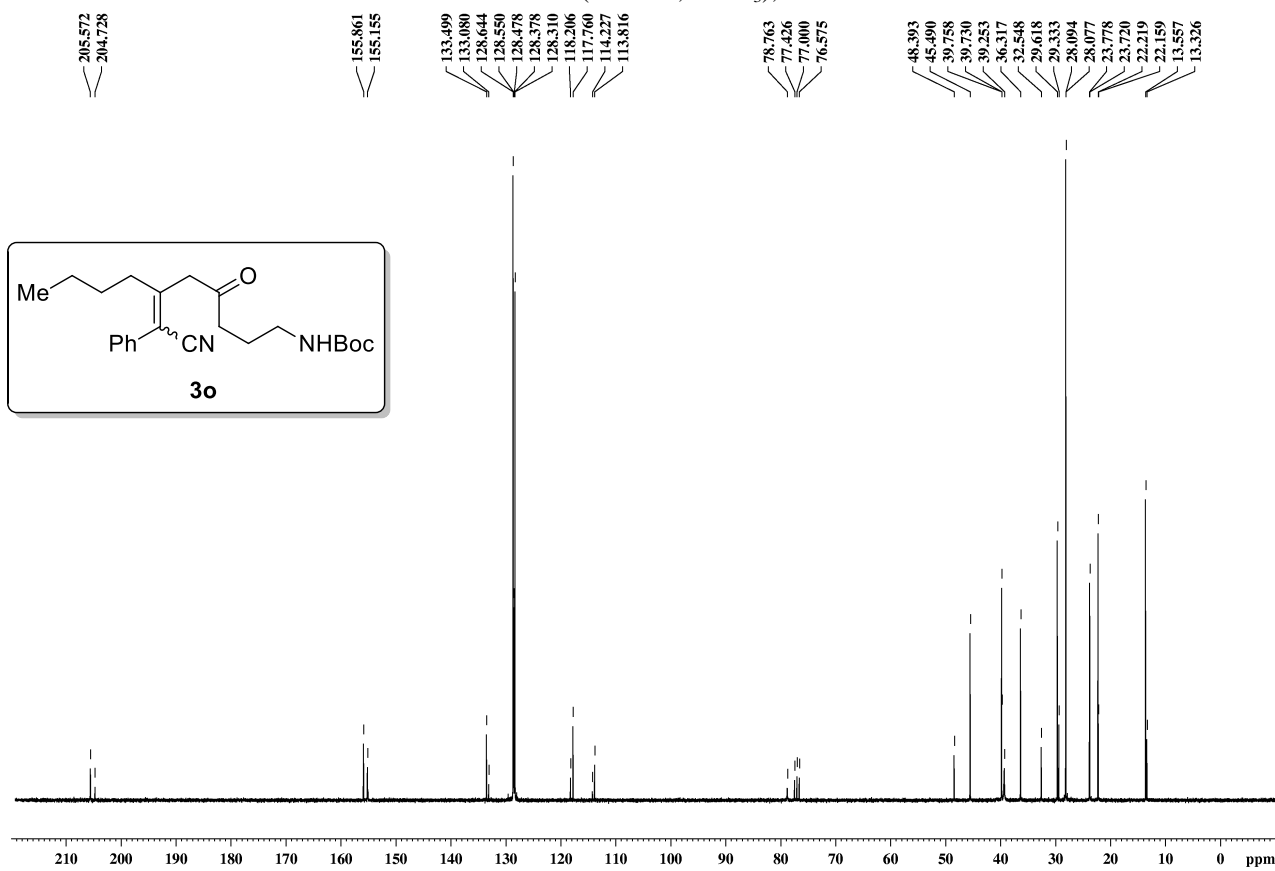

<sup>1</sup>H NMR (300 MHz, CDCl<sub>3</sub>); **3p**

8.305, 8.276, 8.041, 8.012, 7.679, 7.649, 7.501, 7.488, 7.482, 7.467, 7.458, 7.442, 7.434, 7.332, 7.302, 7.276, 7.250, 7.069, 7.065, 7.044, 7.038, 4.742, 4.630, 4.101, 3.717, 3.135, 3.114, 3.092, 3.071, 3.020, 2.999, 2.978, 2.958, 2.632, 2.608, 2.584, 2.370, 2.346, 2.323, 1.825, 1.802, 1.778, 1.755, 1.732, 1.667, 1.644, 1.621, 1.599, 1.576, 1.428, 1.389

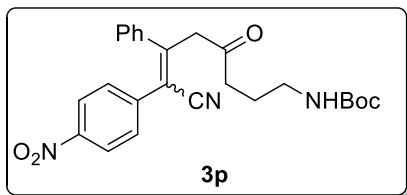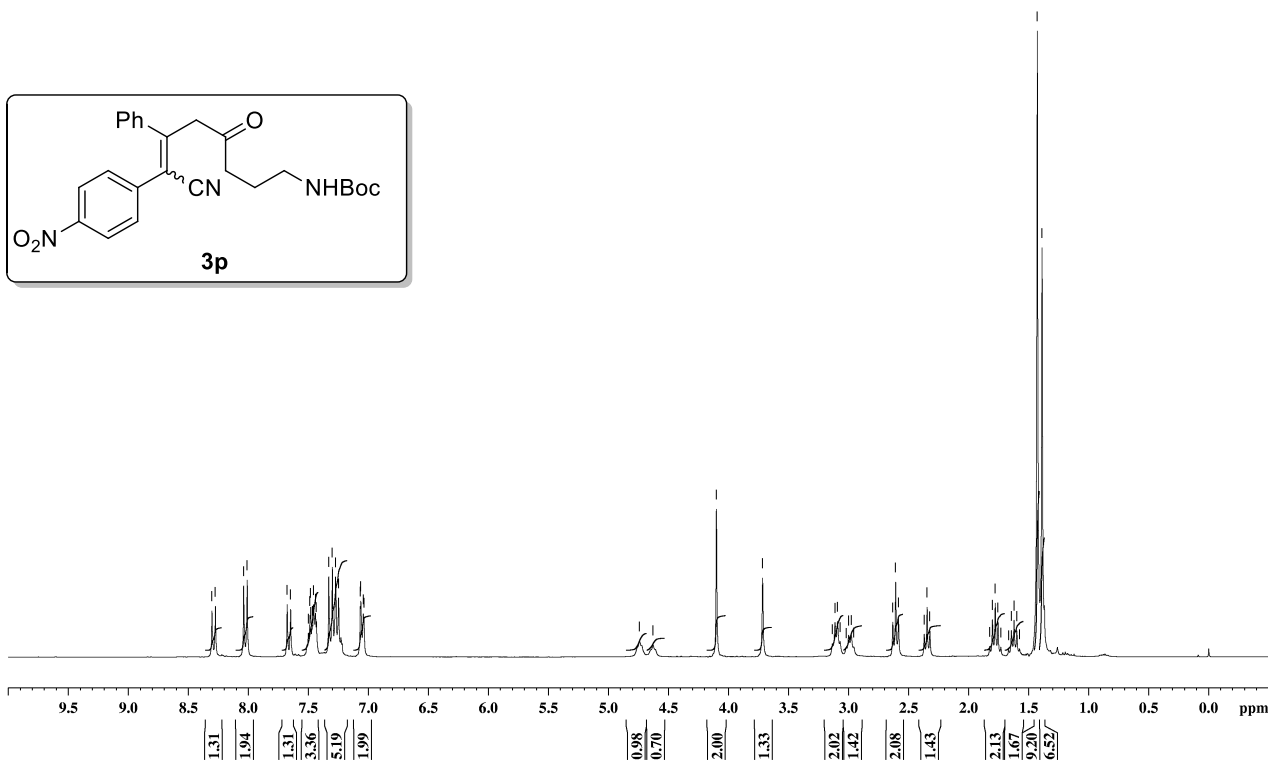

<sup>13</sup>C NMR (75 MHz, CDCl<sub>3</sub>); **3p**

204.932, 203.819, 155.943, 154.942, 147.938, 147.084, 140.114, 139.659, 138.289, 137.080, 130.298, 129.860, 129.780, 129.431, 128.807, 128.758, 128.107, 127.525, 124.113, 123.414, 117.576, 117.536, 113.532, 79.014, 77.425, 77.000, 76.576, 52.190, 48.459, 40.339, 40.184, 39.388, 39.123, 28.207, 28.141, 23.861, 23.819

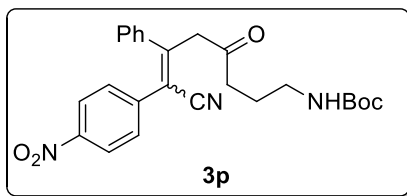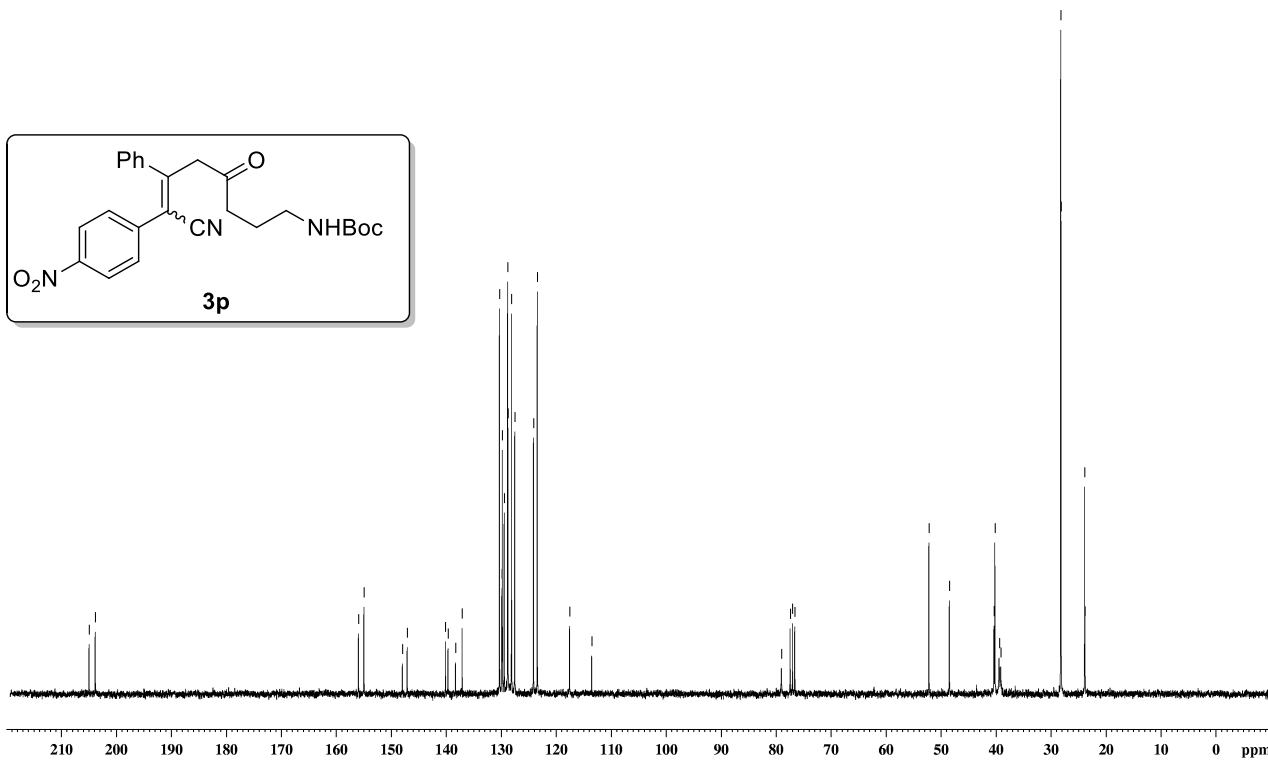

<sup>1</sup>H NMR (300 MHz, CDCl<sub>3</sub>); **3q**

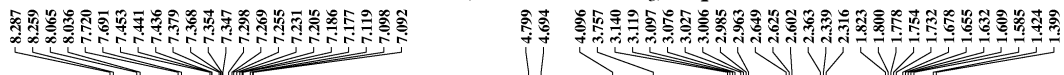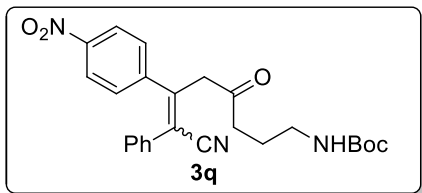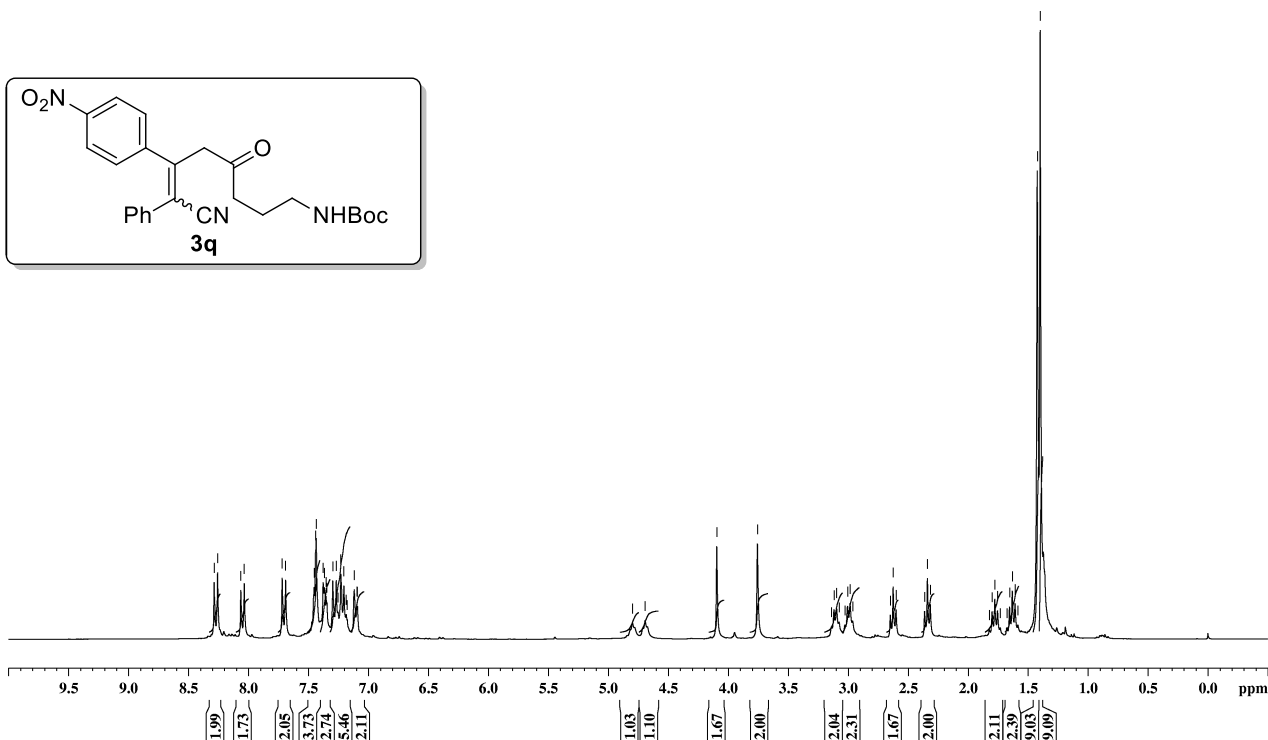

<sup>13</sup>C NMR (75 MHz, CDCl<sub>3</sub>); **3q**

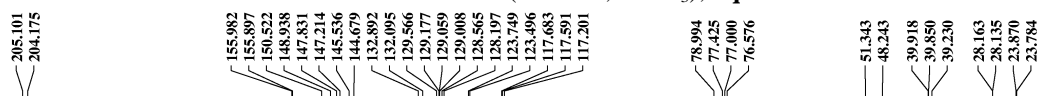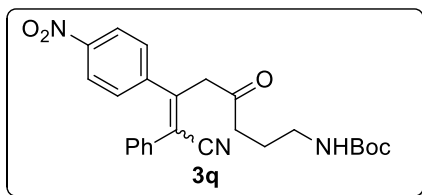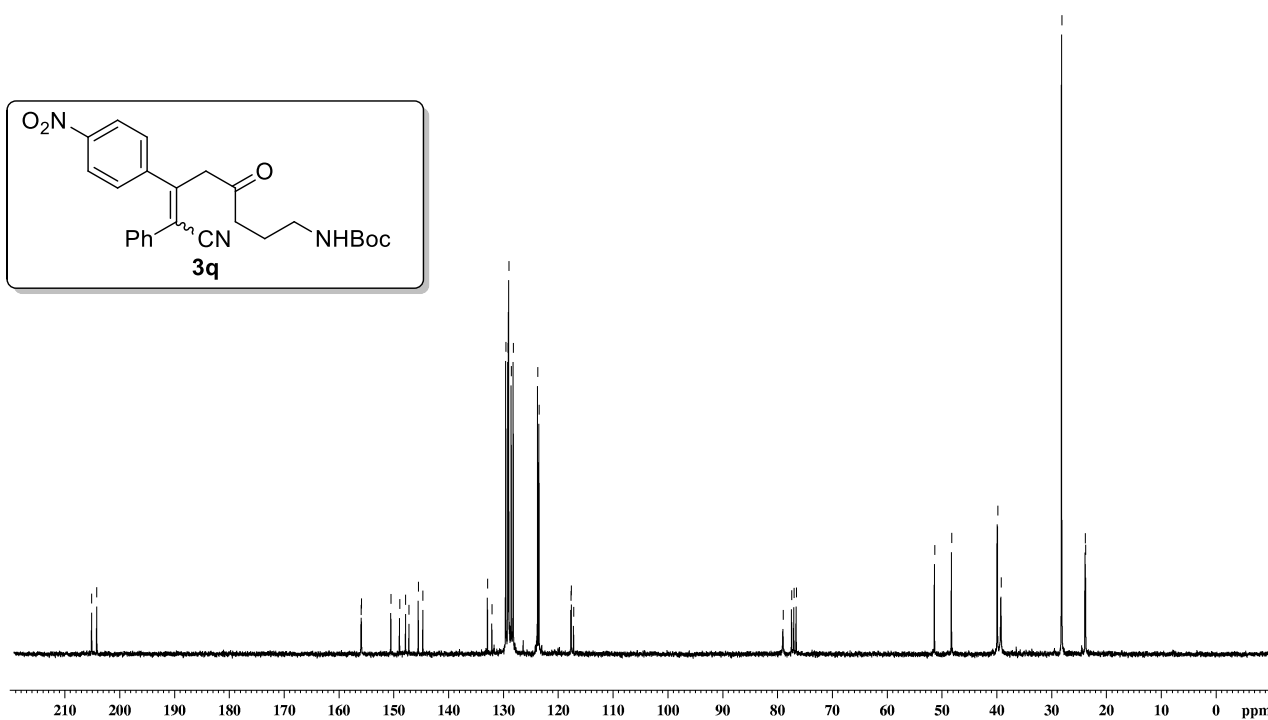

<sup>1</sup>H NMR (300 MHz, CDCl<sub>3</sub>); **3r**

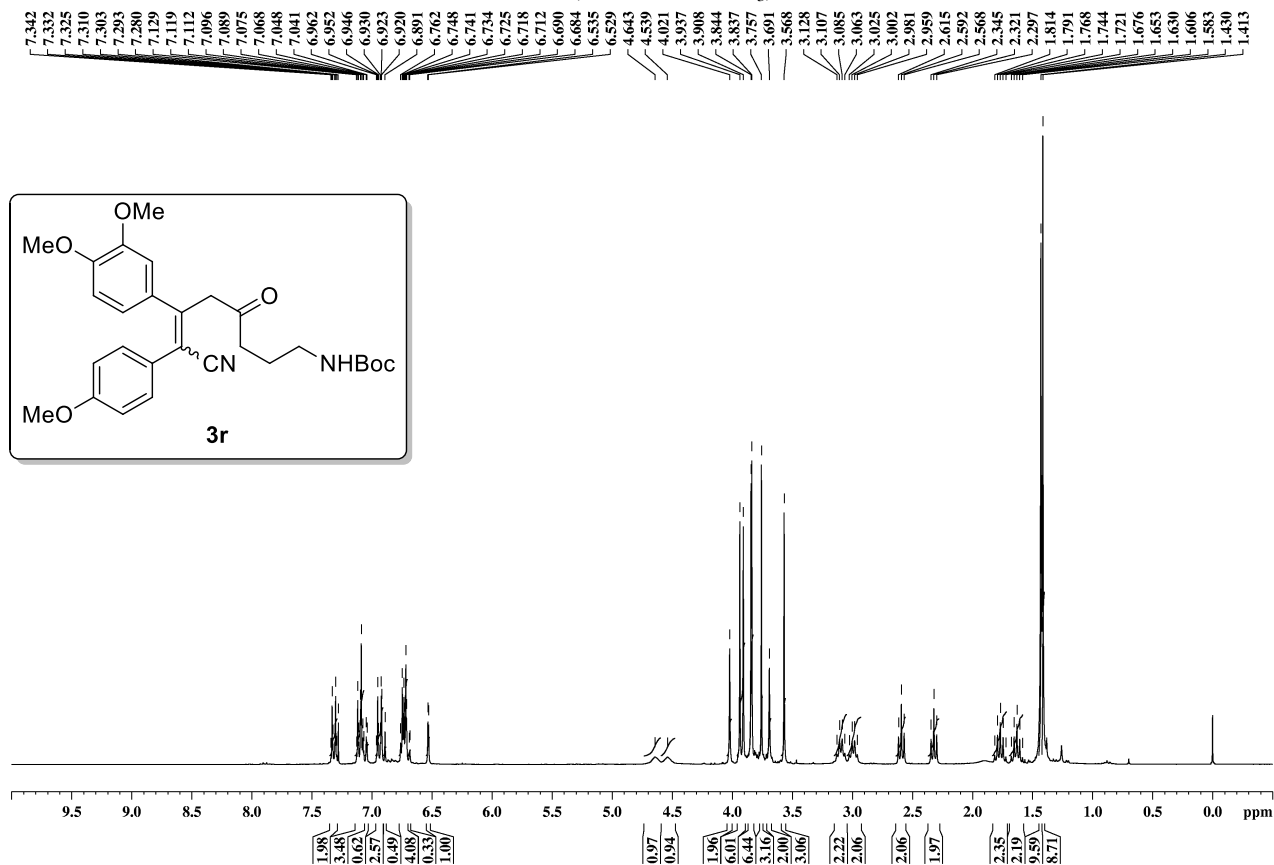

<sup>13</sup>C NMR (75 MHz, CDCl<sub>3</sub>); **3r**

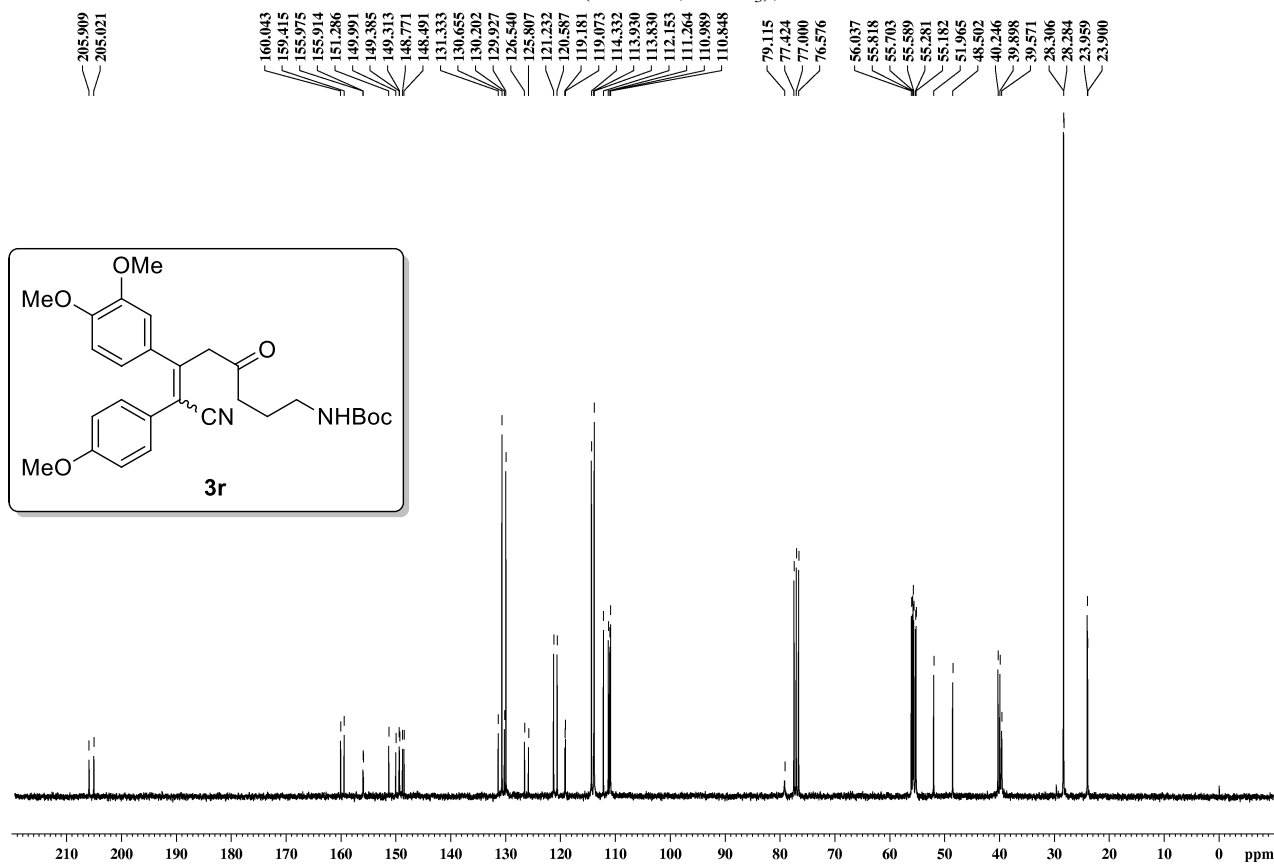

$^1\text{H}$  NMR (300 MHz,  $\text{CDCl}_3$ ); **3s**

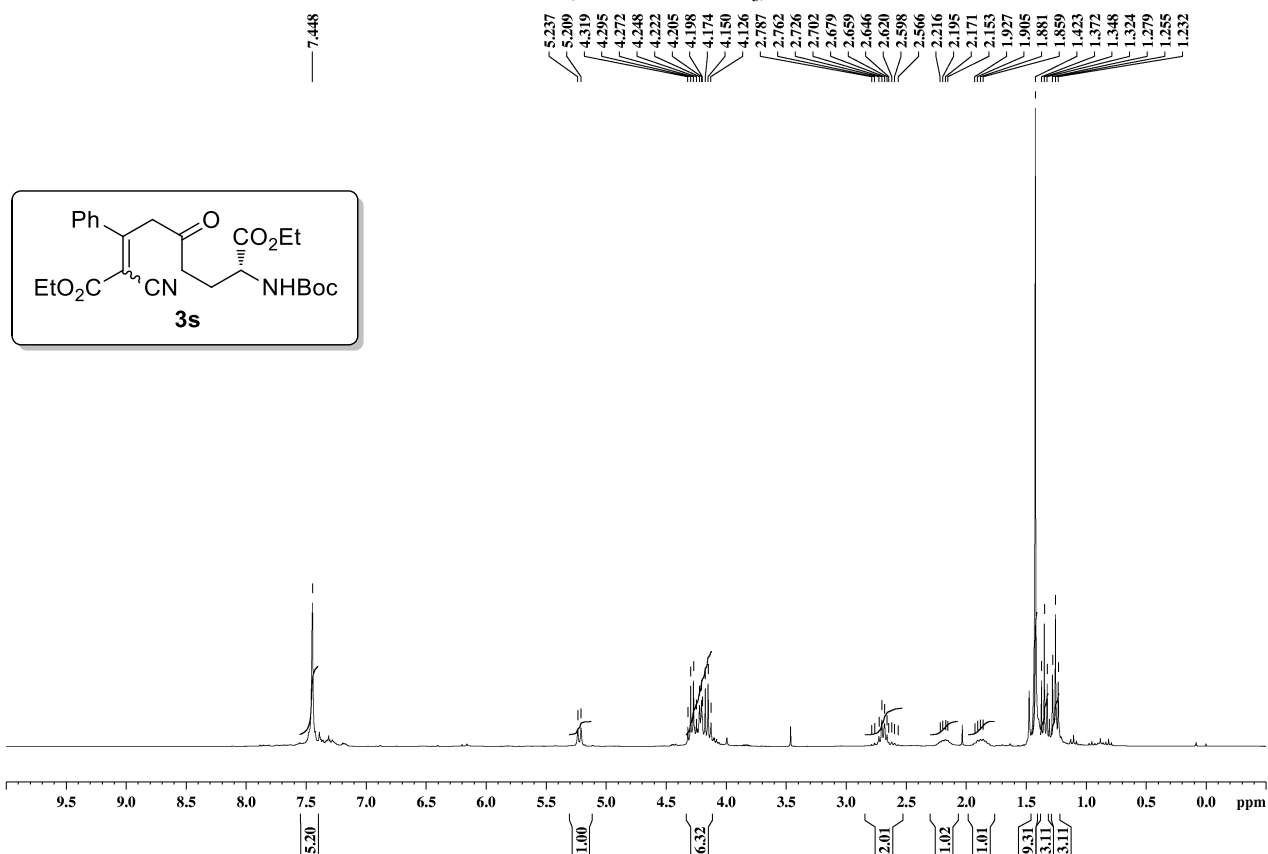

$^{13}\text{C}$  NMR (75 MHz,  $\text{CDCl}_3$ ); **3s**

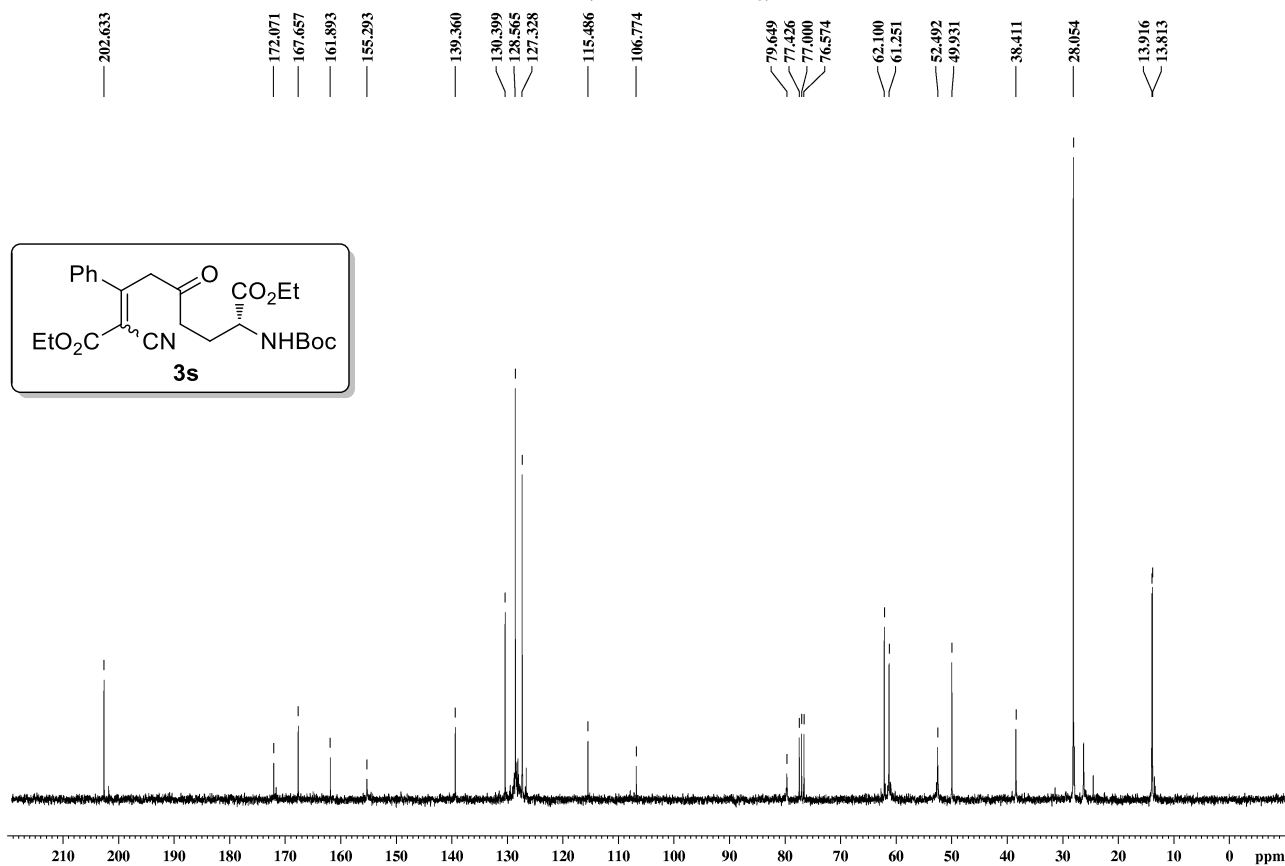

<sup>1</sup>H NMR (300 MHz, CDCl<sub>3</sub>); **6c**

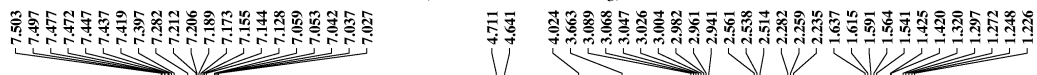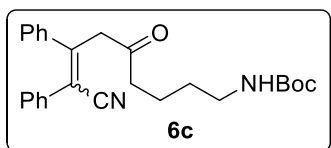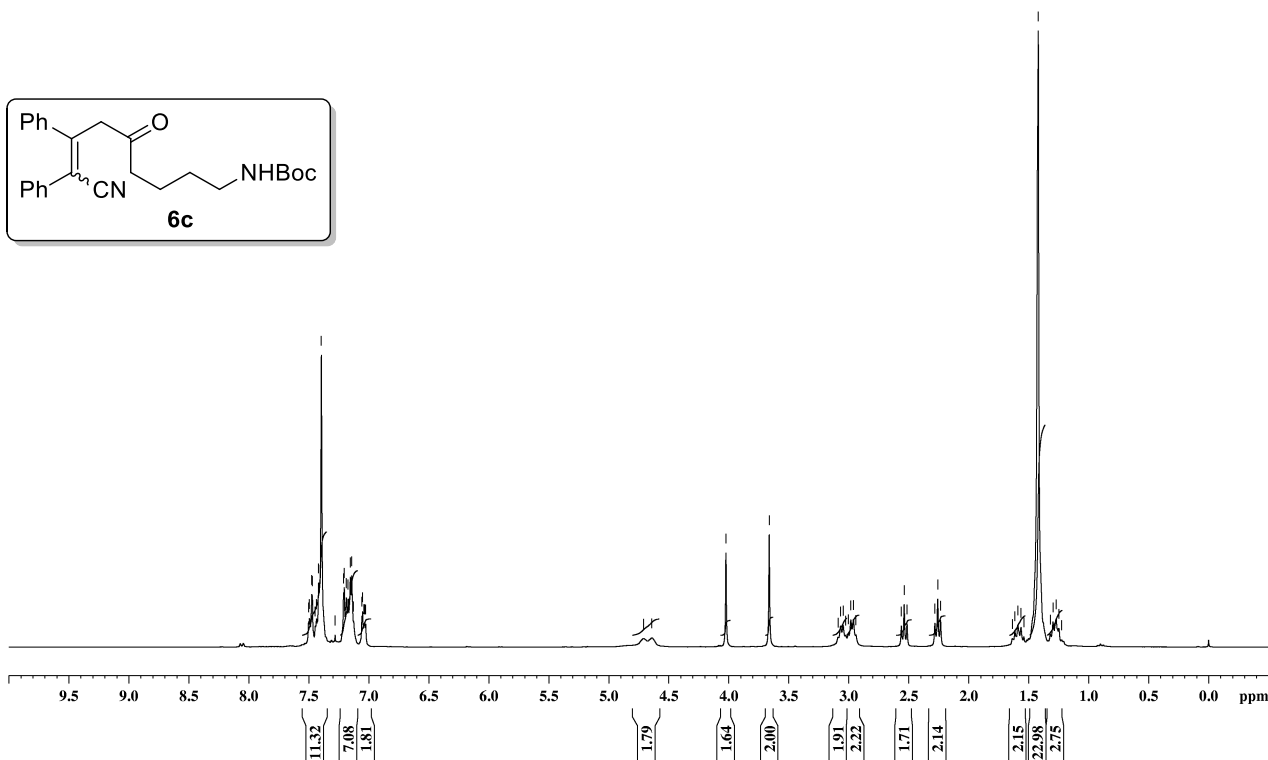

<sup>13</sup>C NMR (75 MHz, CDCl<sub>3</sub>); **6c**

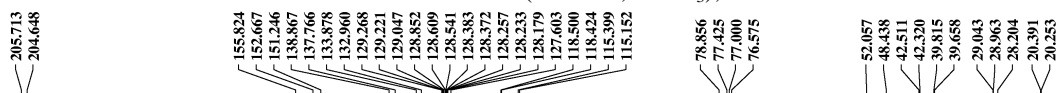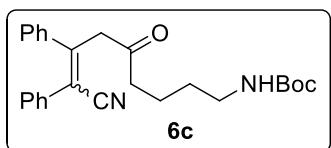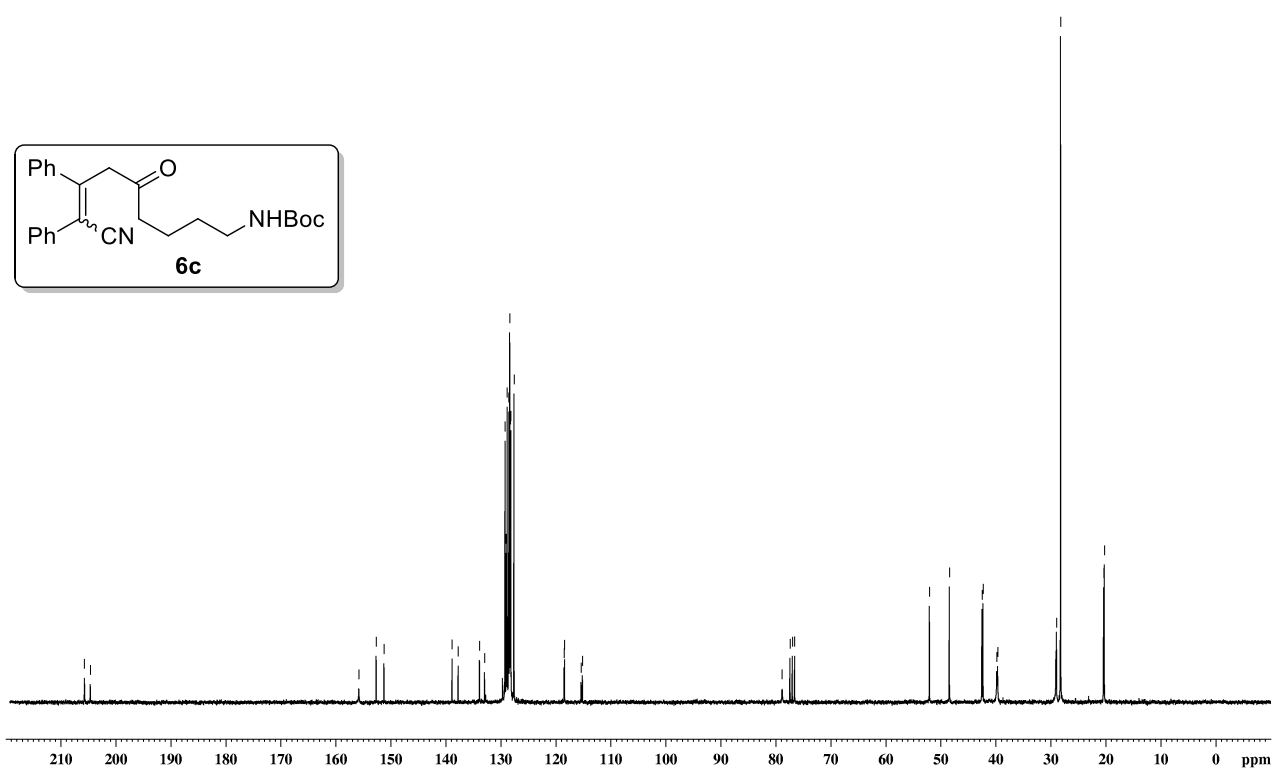

<sup>1</sup>H NMR (300 MHz, CDCl<sub>3</sub>); **6d**

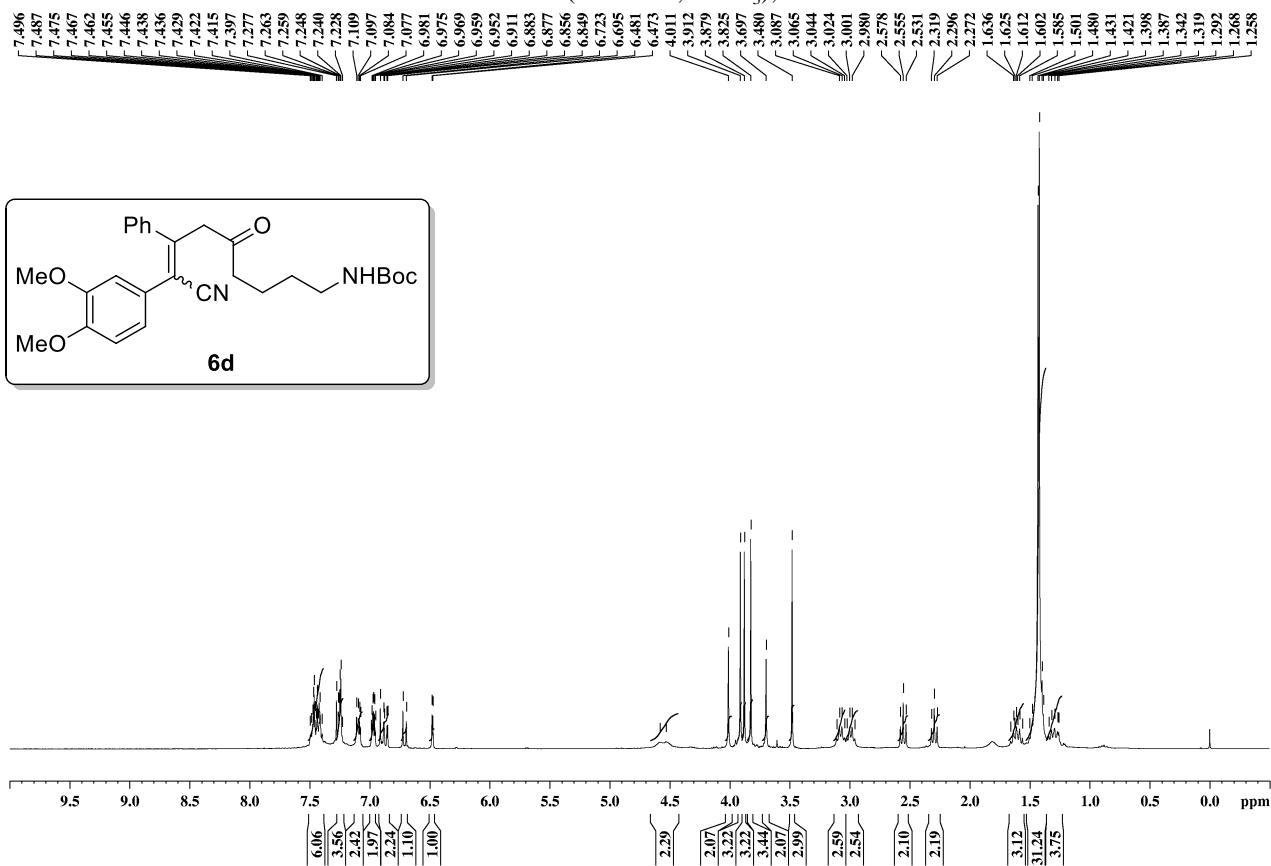

<sup>13</sup>C NMR (75 MHz, CDCl<sub>3</sub>); **6d**

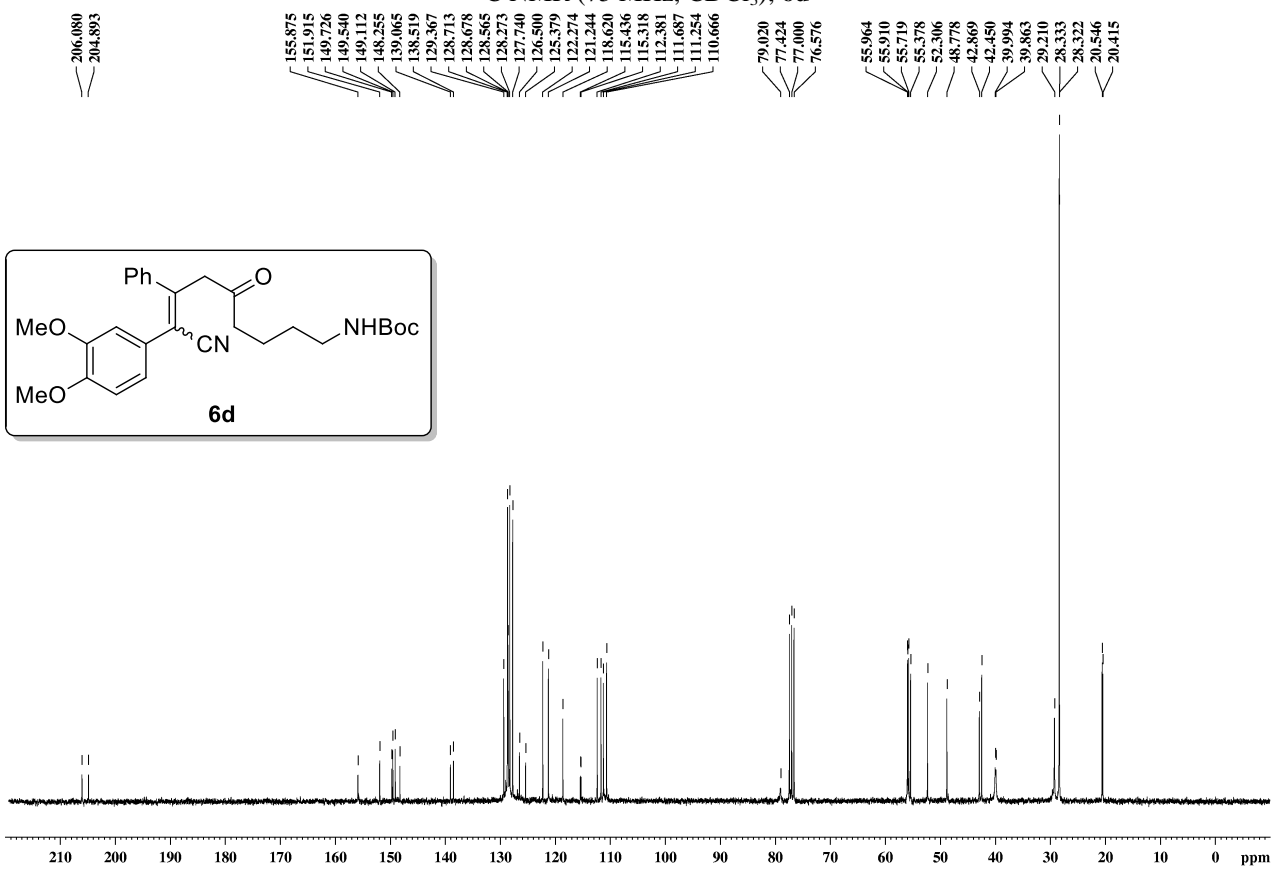



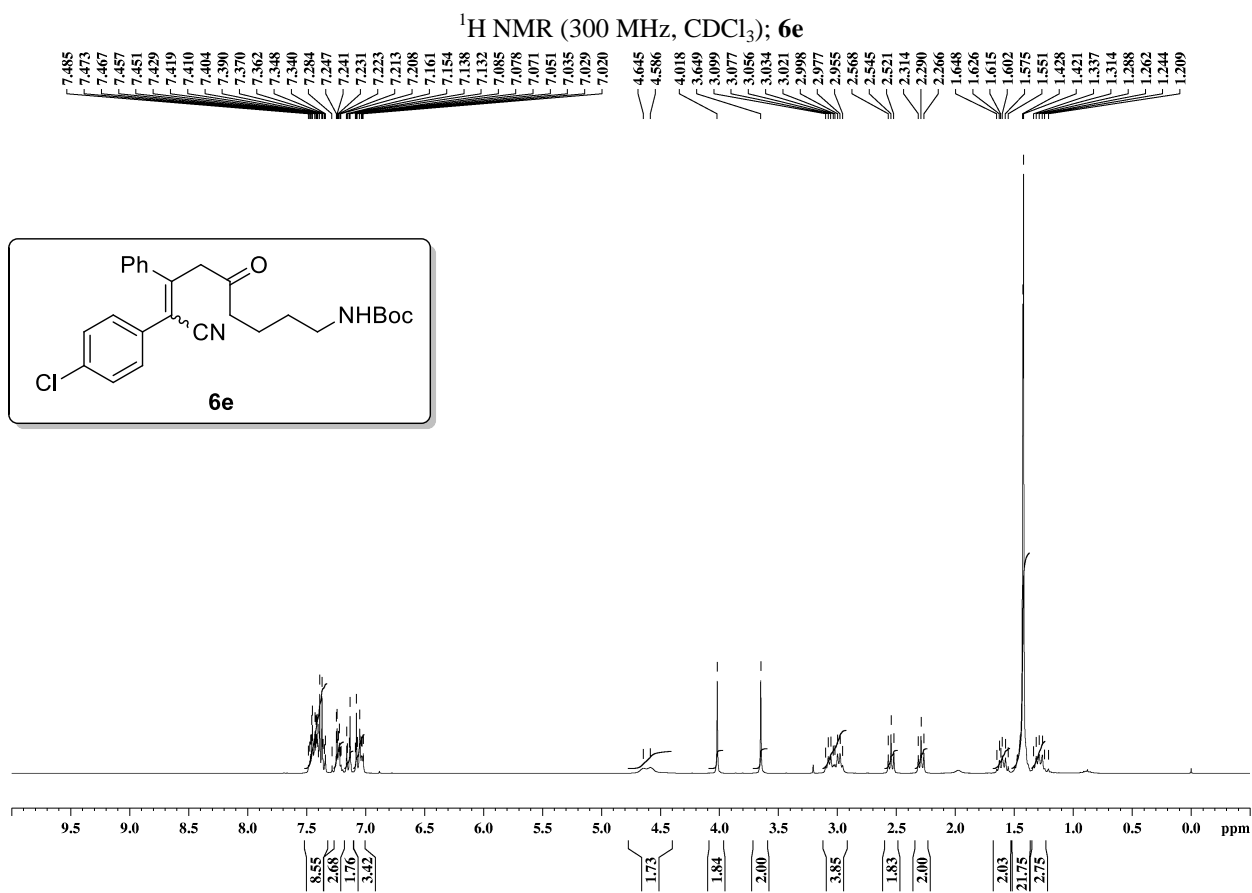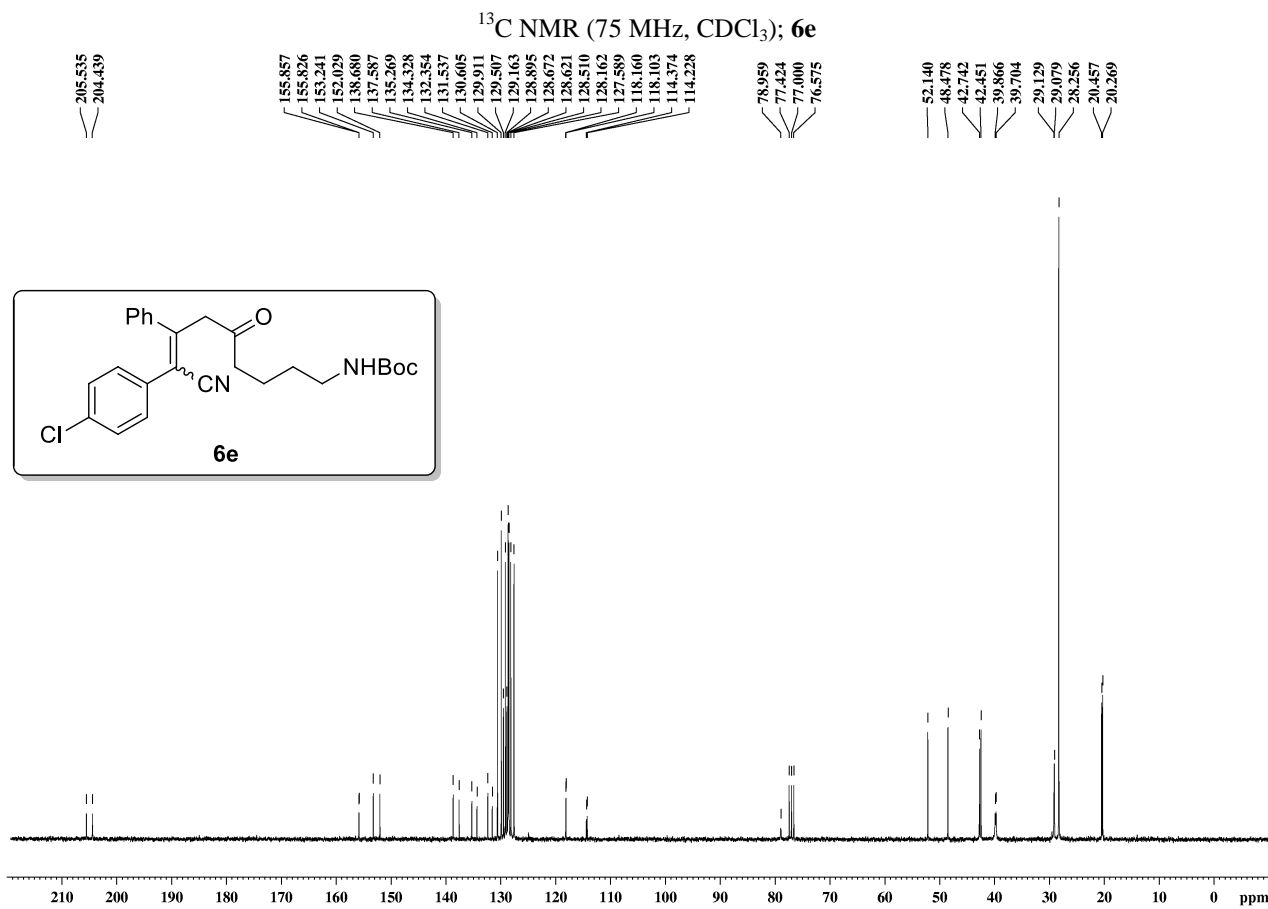

<sup>1</sup>H NMR (300 MHz, CDCl<sub>3</sub>); **6f**

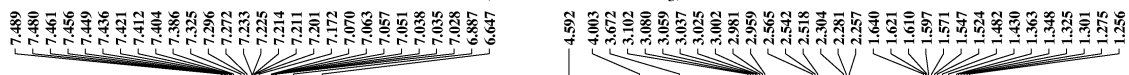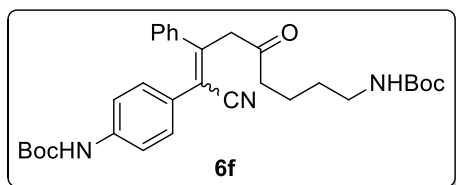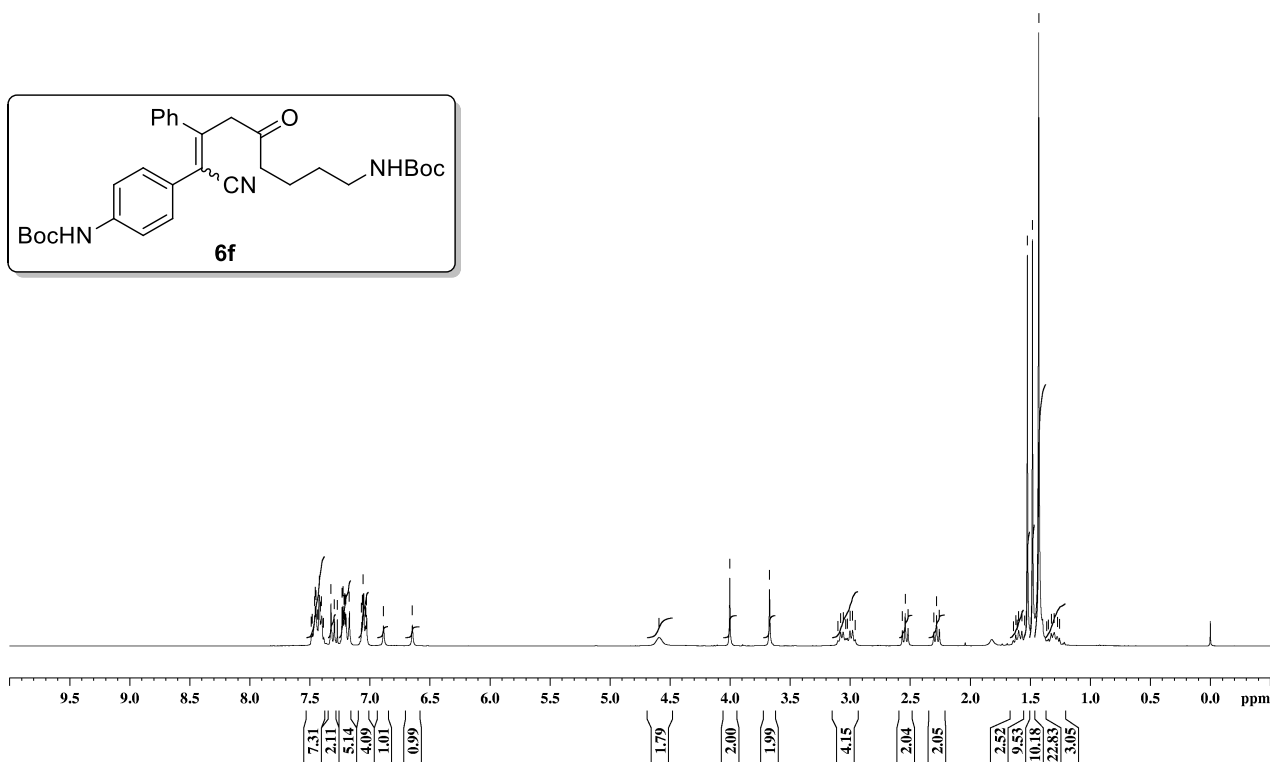

<sup>13</sup>C NMR (75 MHz, CDCl<sub>3</sub>); **6f**

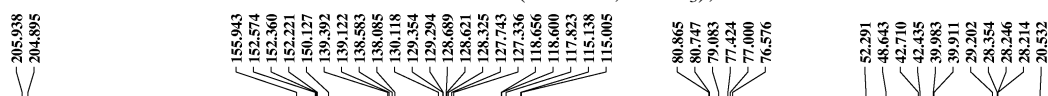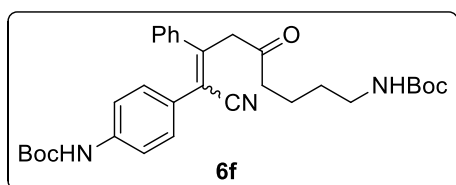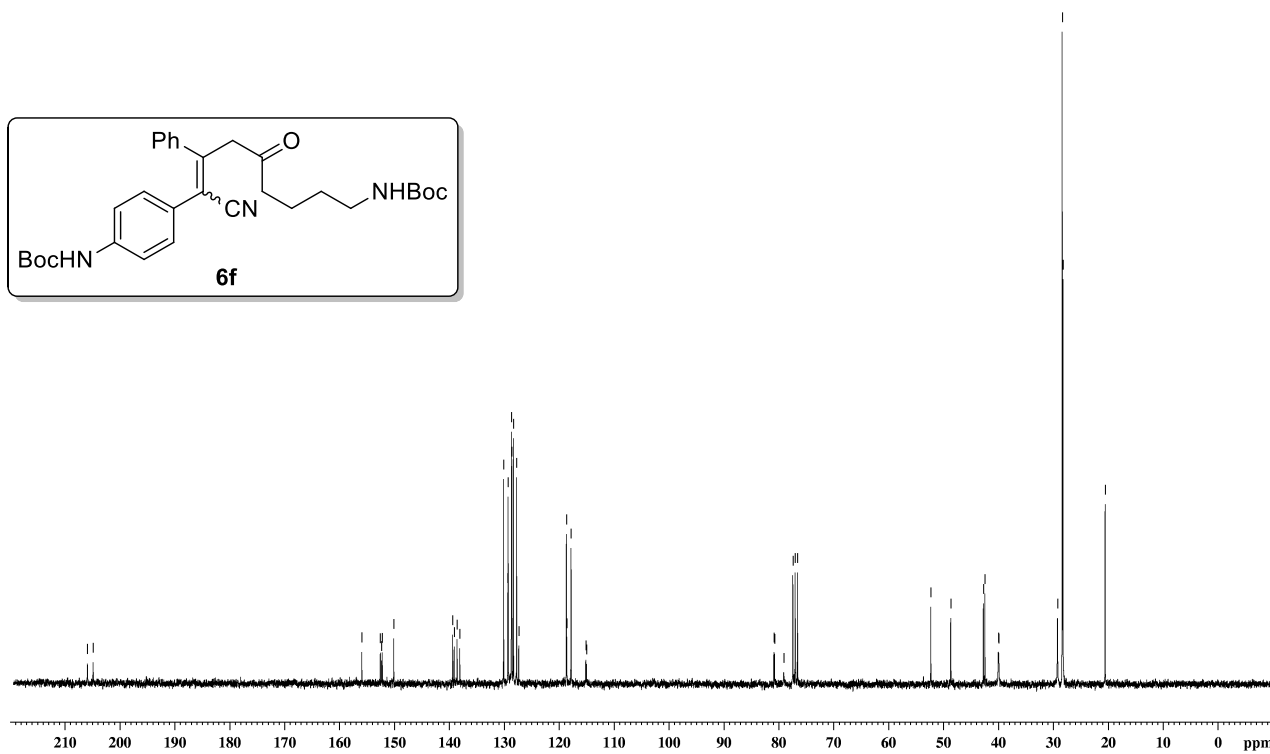

<sup>1</sup>H NMR (300 MHz, CDCl<sub>3</sub>); **6g**

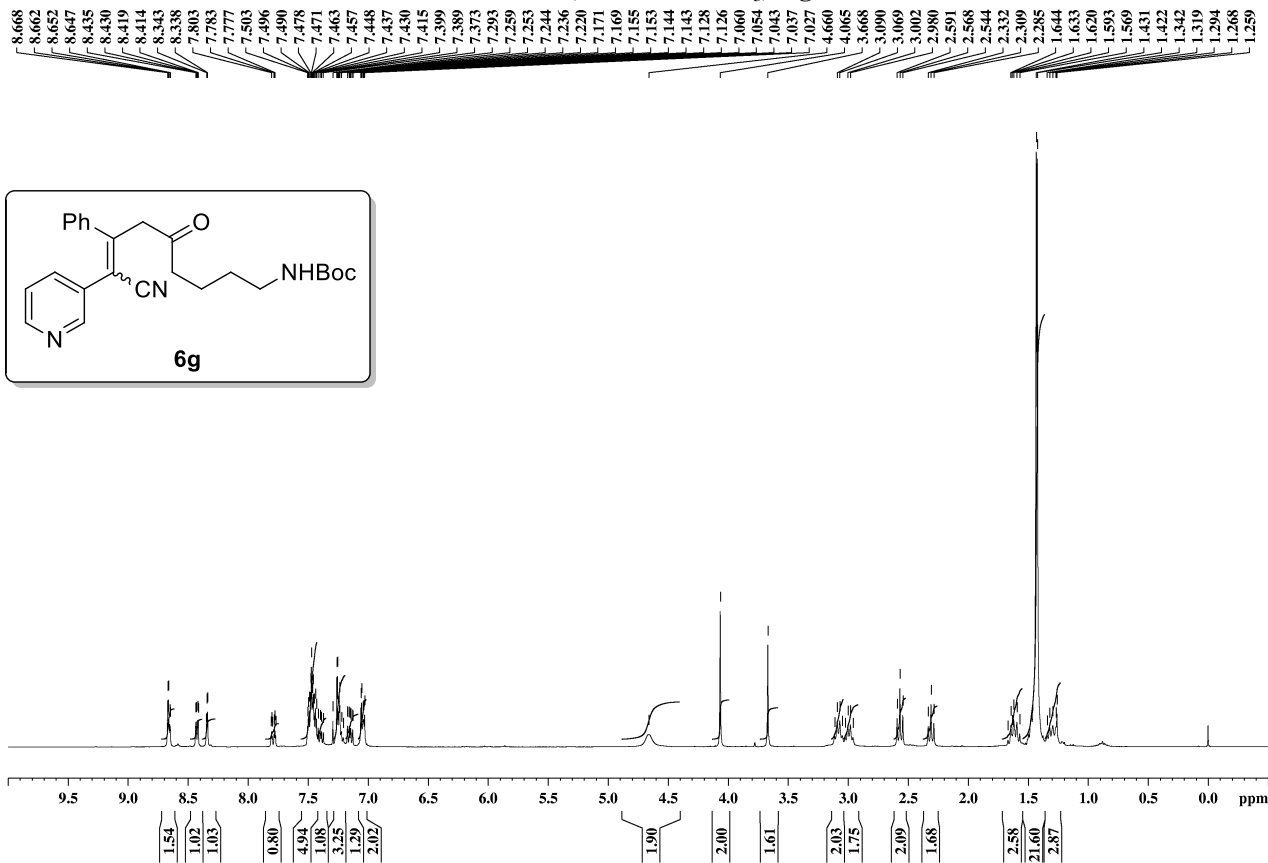

<sup>13</sup>C NMR (75 MHz, CDCl<sub>3</sub>); **6g**

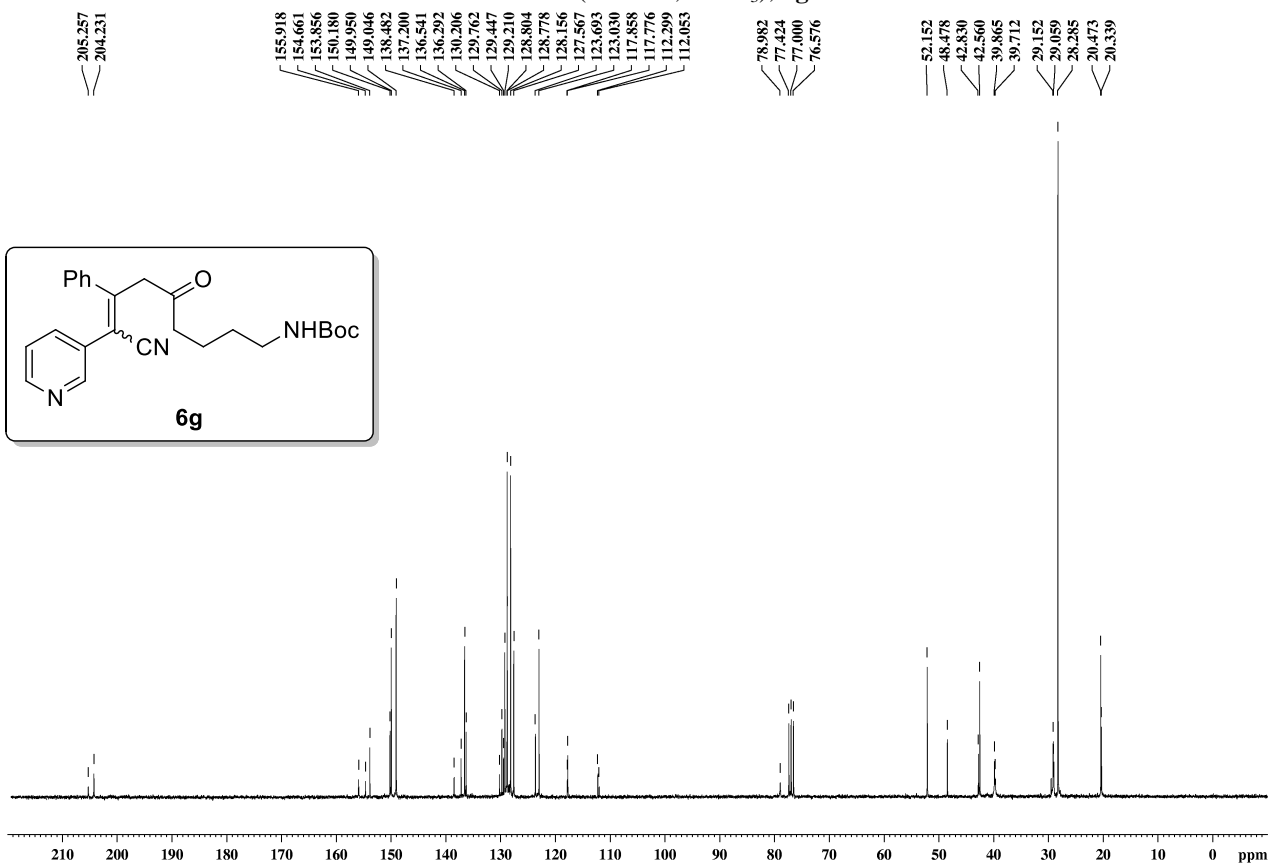

<sup>1</sup>H NMR (300 MHz, CDCl<sub>3</sub>); **6h**

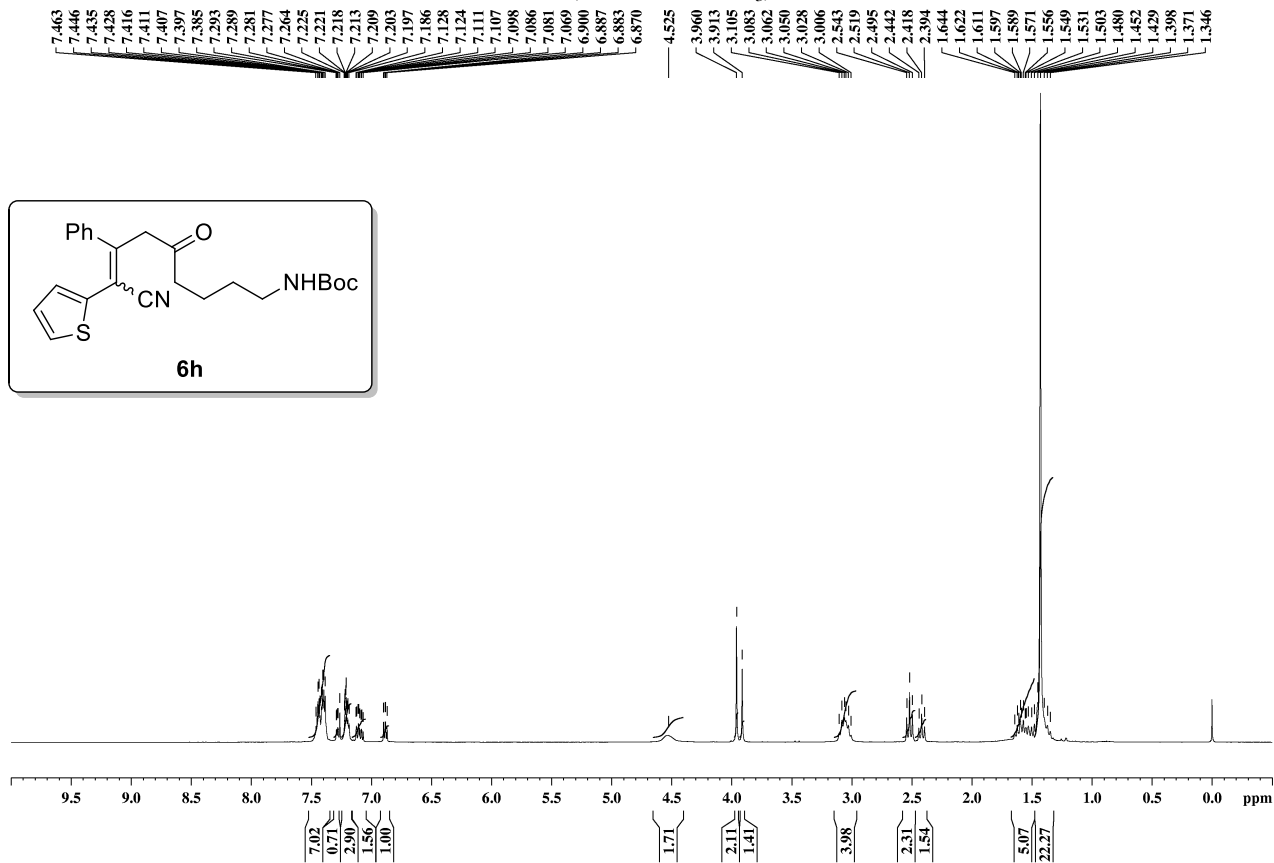

<sup>13</sup>C NMR (75 MHz, CDCl<sub>3</sub>); **6h**

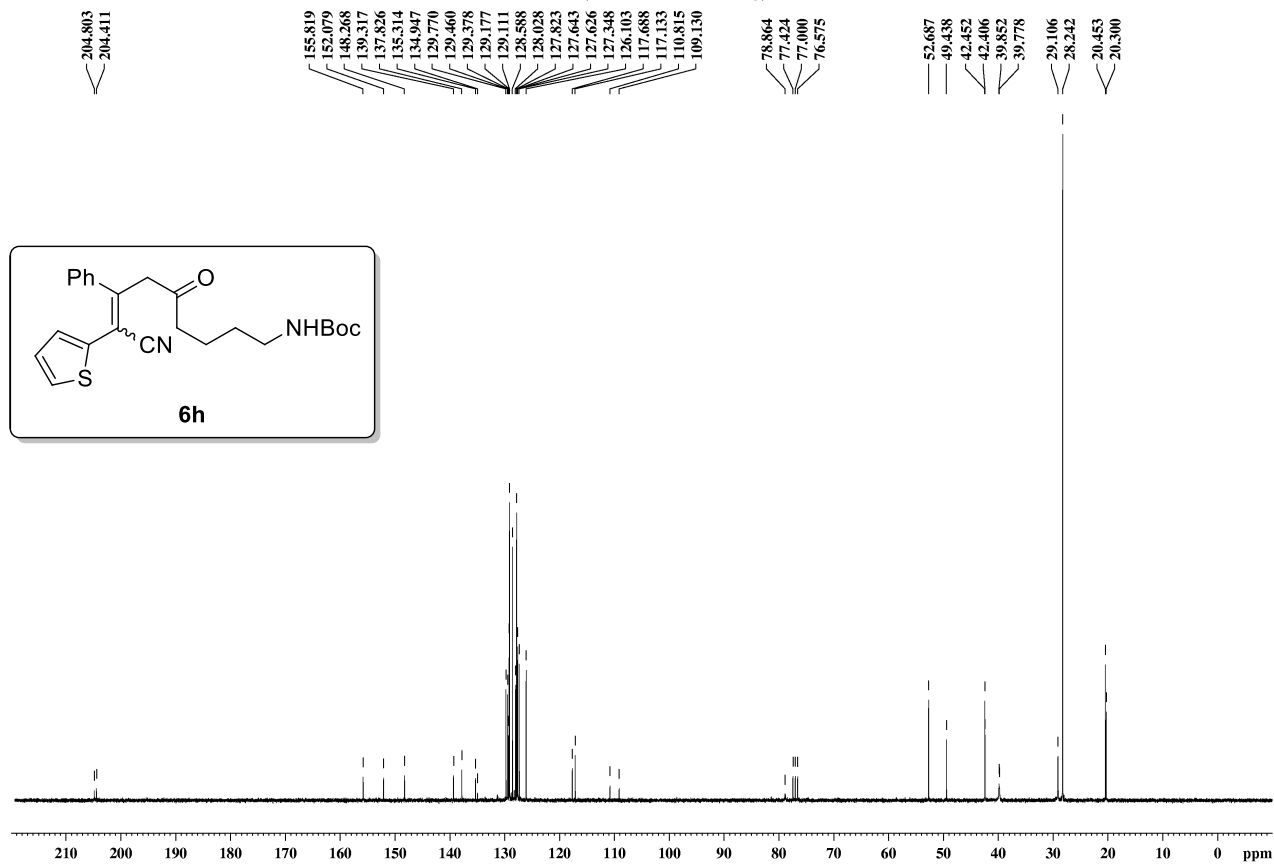

<sup>1</sup>H NMR (300 MHz, CDCl<sub>3</sub>); **6i**

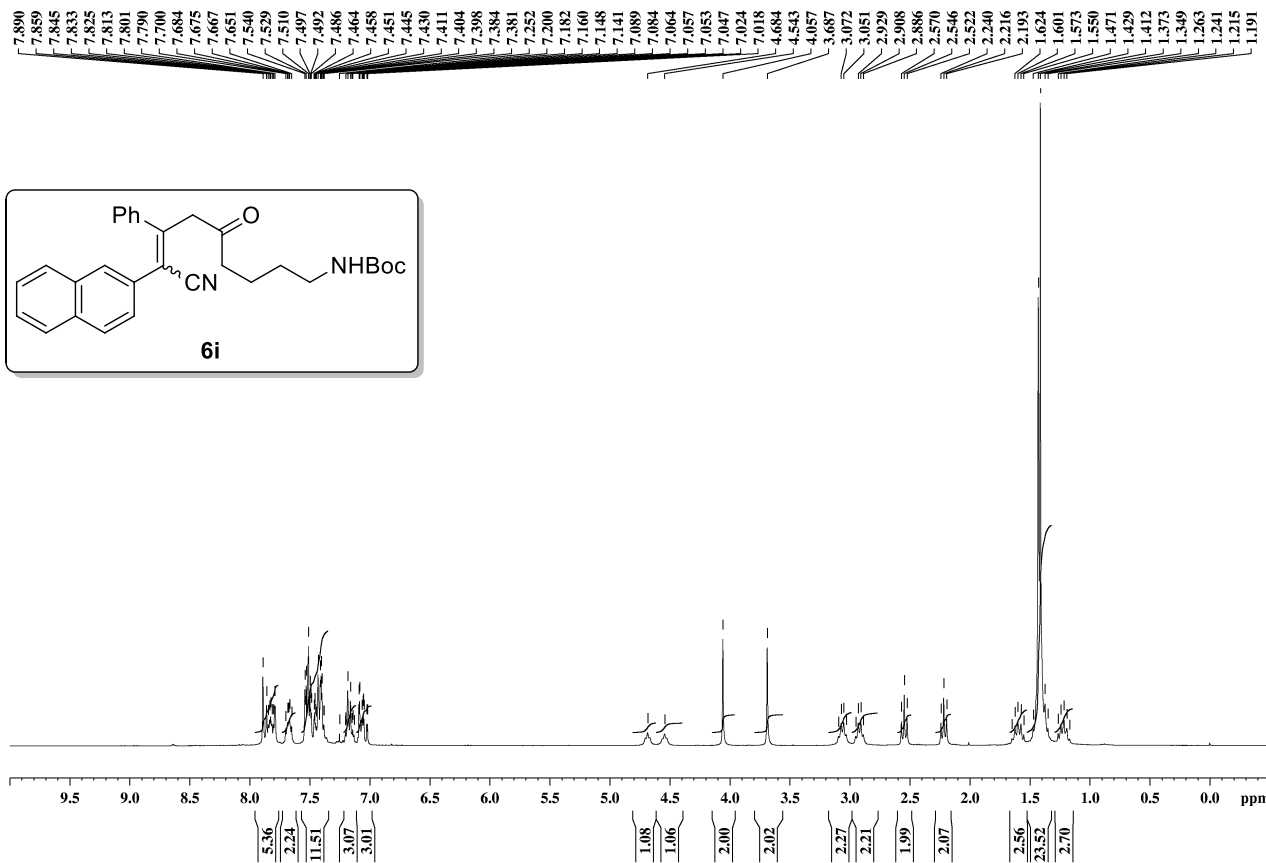

<sup>13</sup>C NMR (75 MHz, CDCl<sub>3</sub>); **6i**

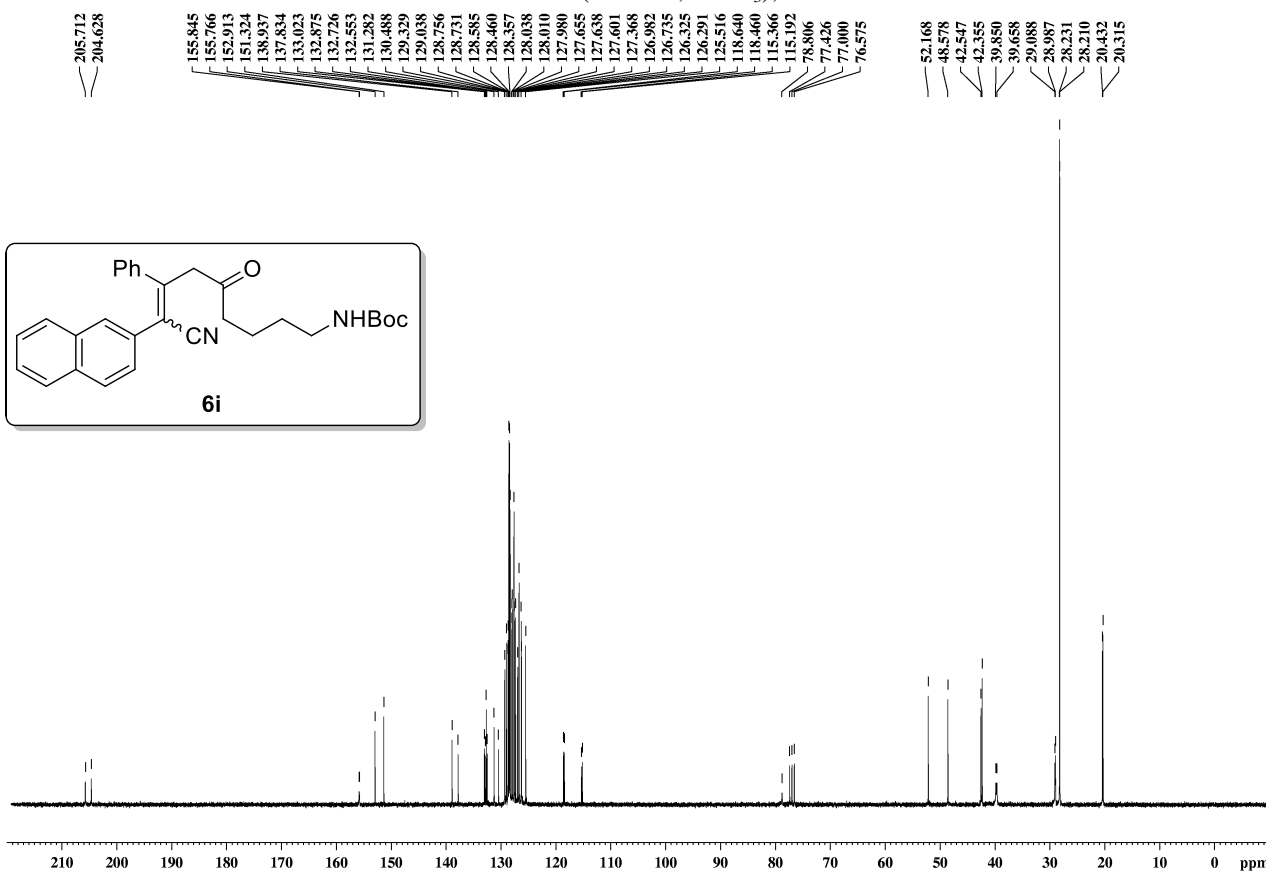

<sup>1</sup>H NMR (300 MHz, CDCl<sub>3</sub>); **6j**

7.417, 7.414, 7.403, 7.395, 7.380, 7.376, 7.367, 7.231, 7.224, 7.216, 7.207, 7.200, 7.197, 7.185, 7.171, 7.112, 7.106, 7.079, 7.072, 7.052, 7.045, 6.924, 6.896, 6.755, 6.728, 6.715, 6.708, 6.687, 6.681, 6.468, 6.463, 4.647, 4.579, 4.037, 3.936, 3.904, 3.829, 3.660, 3.492, 3.116, 3.095, 3.073, 3.052, 3.035, 3.013, 2.992, 2.971, 2.601, 2.578, 2.554, 2.512, 2.289, 2.265, 1.668, 1.645, 1.634, 1.621, 1.594, 1.571, 1.502, 1.479, 1.448, 1.429, 1.422, 1.375, 1.359, 1.335, 1.309

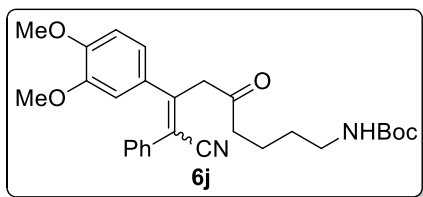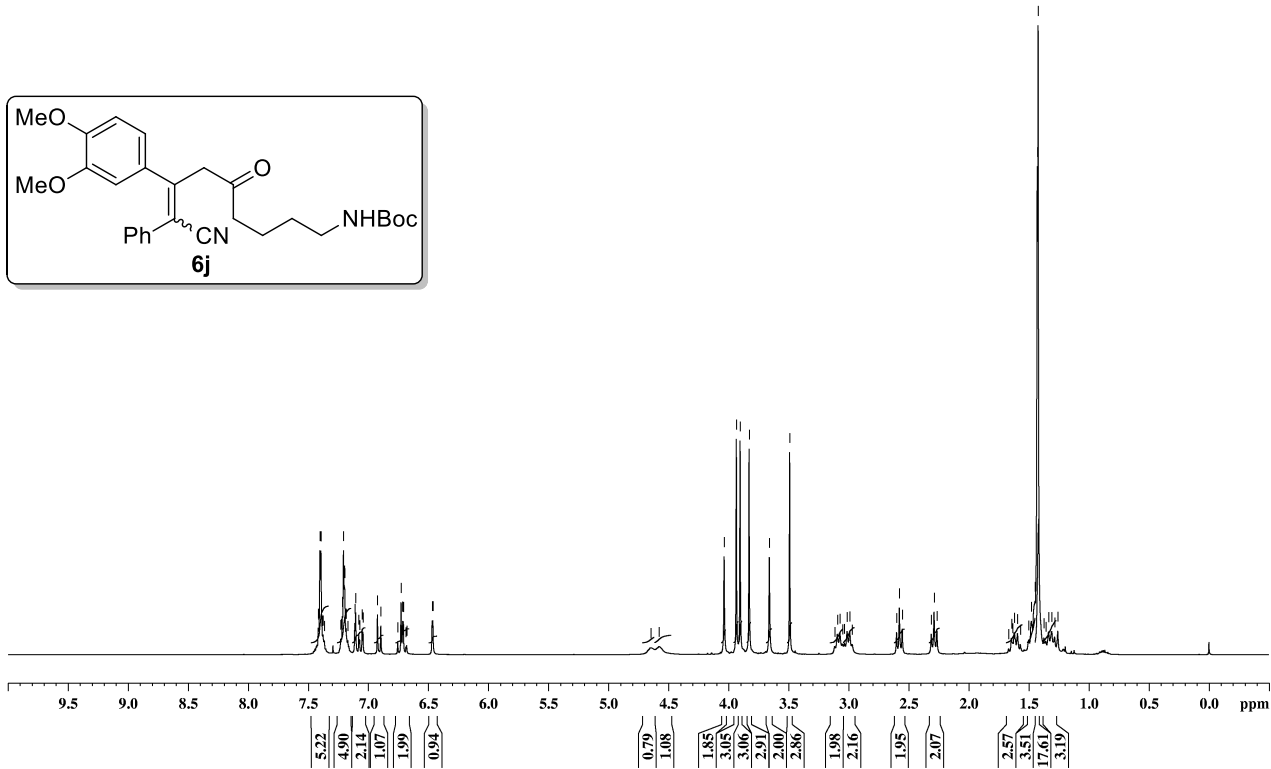

<sup>13</sup>C NMR (75 MHz, CDCl<sub>3</sub>); **6j**

205.911, 204.958, 155.873, 155.832, 152.217, 150.859, 150.020, 149.490, 148.717, 148.324, 134.276, 133.636, 131.175, 129.812, 129.280, 128.992, 128.909, 128.506, 128.406, 128.217, 121.144, 120.530, 118.926, 118.853, 114.162, 114.066, 112.346, 111.230, 110.960, 110.748, 78.960, 77.424, 77.000, 76.576, 55.983, 55.770, 55.642, 55.435, 51.832, 48.381, 42.526, 39.905, 39.756, 29.182, 29.115, 28.253, 20.464, 20.324

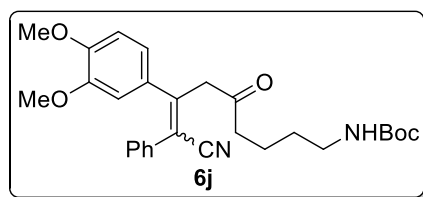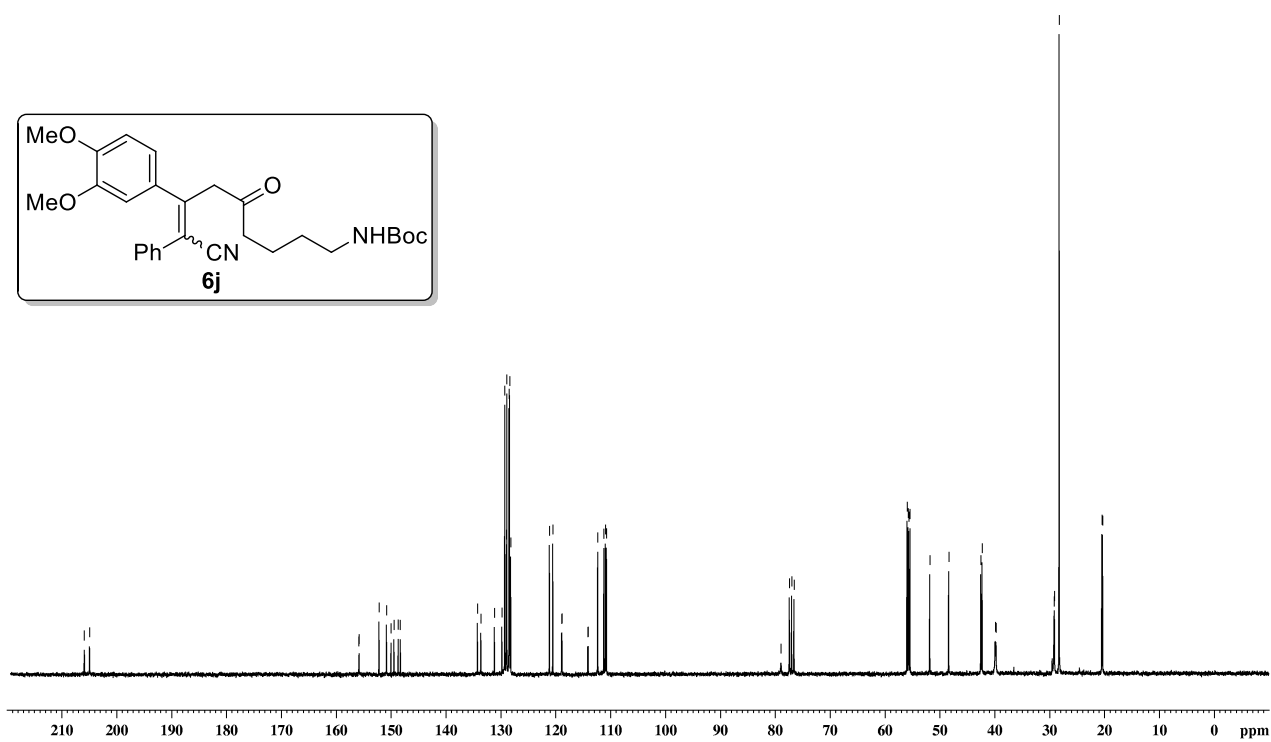

<sup>1</sup>H NMR (300 MHz, CDCl<sub>3</sub>); **6k**

7.459, 7.453, 7.431, 7.416, 7.404, 7.399, 7.375, 7.369, 7.358, 7.343, 7.336, 7.211, 7.205, 7.194, 7.186, 7.158, 7.141, 7.135, 7.124, 7.108, 7.009, 6.980, 4.755, 4.693, 4.007, 3.650, 3.105, 3.084, 3.063, 3.041, 3.027, 3.005, 2.984, 2.963, 2.578, 2.555, 2.531, 2.302, 2.279, 2.255, 1.649, 1.626, 1.602, 1.576, 1.552, 1.487, 1.462, 1.425, 1.419, 1.367, 1.350, 1.327, 1.301, 1.277, 1.262

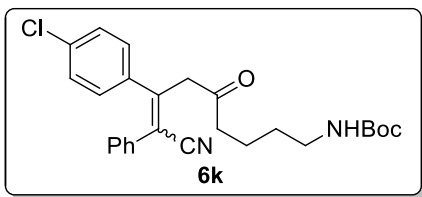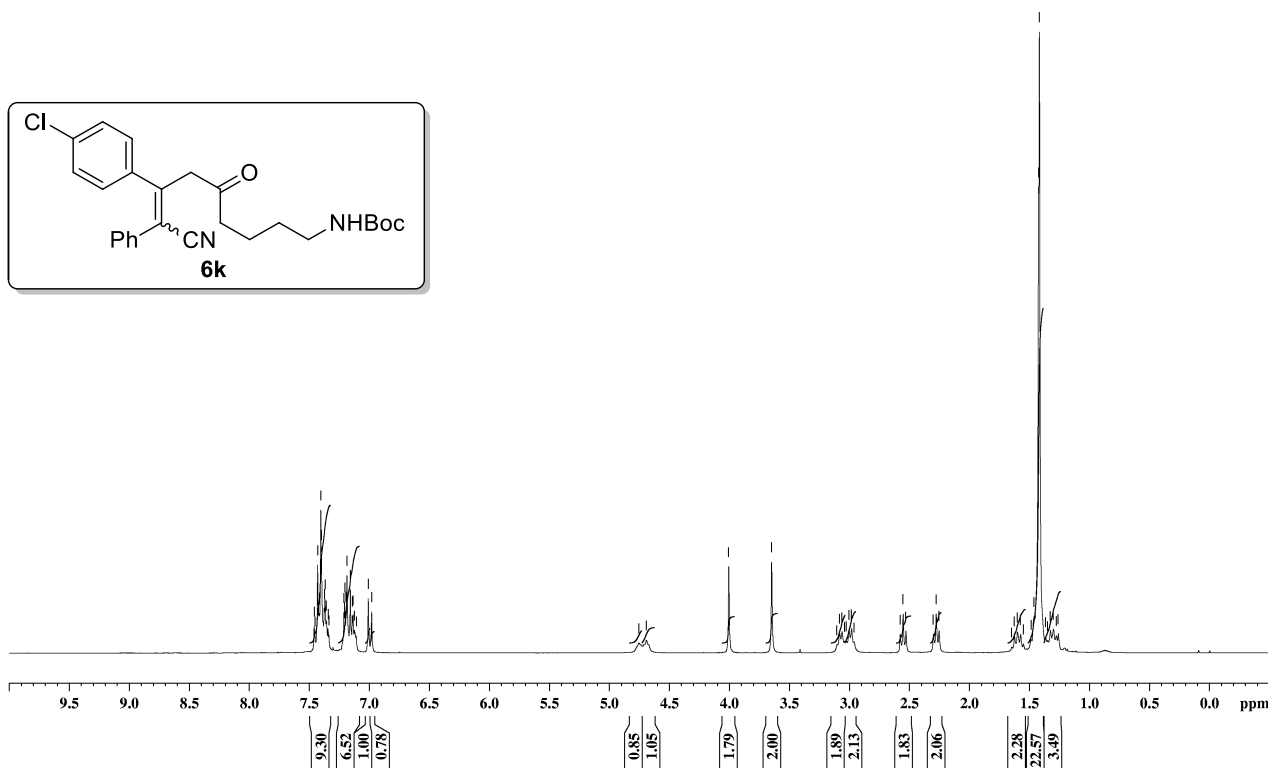

<sup>13</sup>C NMR (75 MHz, CDCl<sub>3</sub>); **6k**

205.554, 204.547, 155.775, 151.458, 149.918, 137.335, 136.197, 135.184, 134.535, 133.507, 132.630, 129.708, 129.183, 129.140, 129.066, 128.881, 128.761, 128.603, 128.476, 128.340, 128.231, 118.206, 118.135, 115.875, 115.620, 78.791, 77.426, 77.000, 76.576, 51.710, 48.291, 42.386, 42.316, 39.736, 39.580, 29.020, 28.963, 28.157, 20.338, 20.198

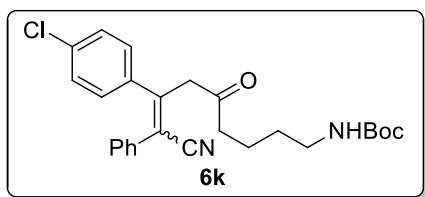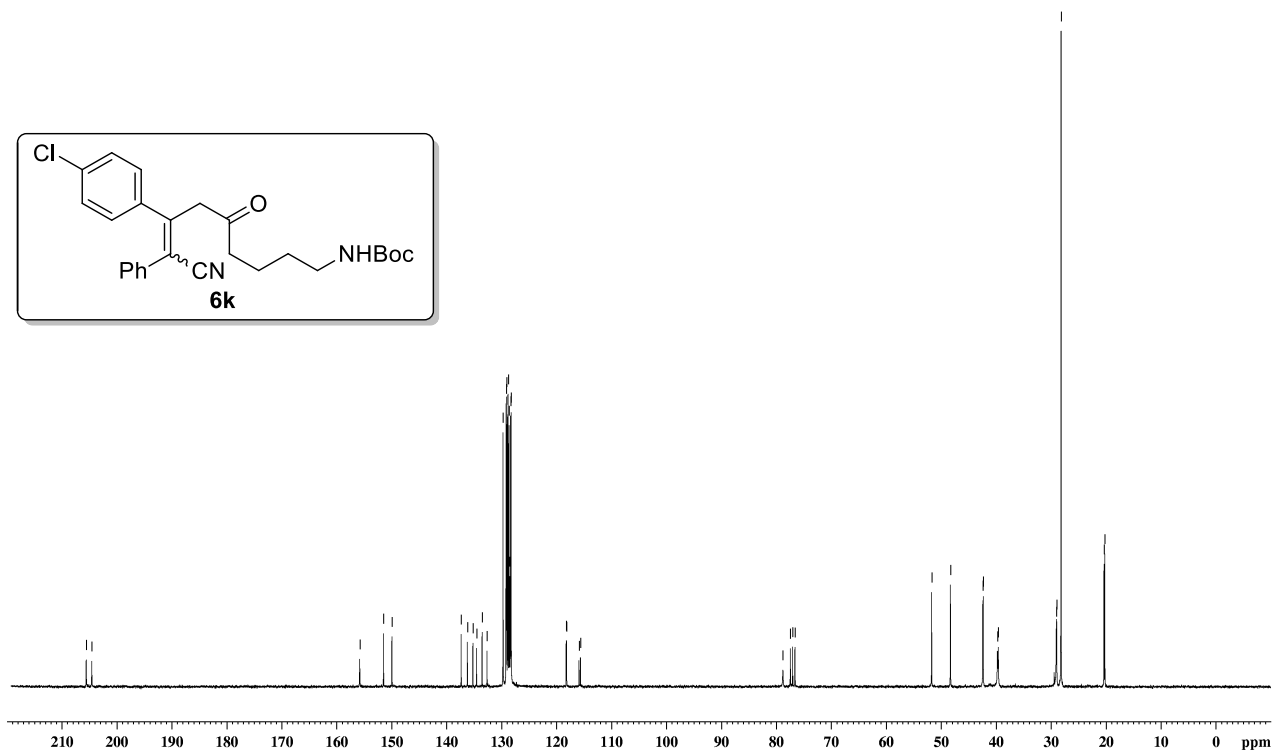

<sup>1</sup>H NMR (300 MHz, CDCl<sub>3</sub>); **6I**

7.429  
7.413  
7.399  
7.391  
7.376  
7.374  
7.362  
7.351  
7.271  
7.235  
7.213  
7.205  
7.190  
7.179  
7.173  
7.159  
7.150  
7.144  
6.984  
6.955  
6.781  
6.649

4.603  
4.552  
4.010  
3.646  
3.104  
3.083  
3.062  
3.040  
3.029  
3.006  
2.985  
2.963  
2.569  
2.546  
2.522  
2.297  
2.273  
2.250  
1.805  
1.643  
1.620  
1.608  
1.597  
1.588  
1.569  
1.546  
1.522  
1.487  
1.468  
1.433  
1.427  
1.394  
1.344  
1.321  
1.307  
1.297  
1.273  
1.257

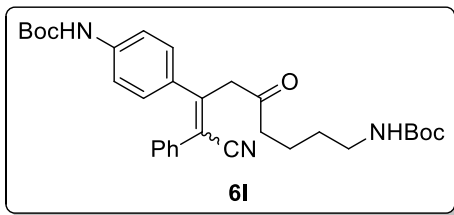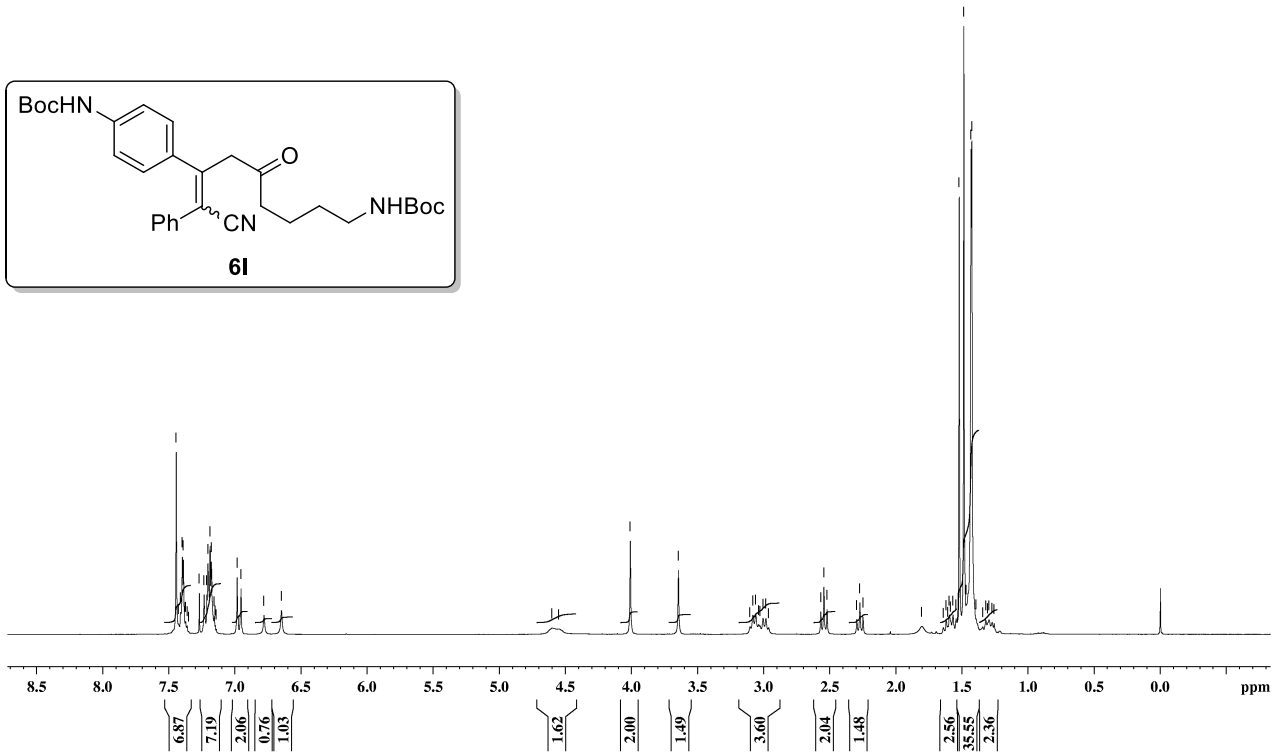

<sup>13</sup>C NMR (75 MHz, CDCl<sub>3</sub>); **6I**

205.882  
204.918

155.886  
155.856  
152.906  
152.392  
152.225  
150.742  
139.792  
139.169  
134.129  
133.249  
132.850  
131.609  
129.297  
129.246  
128.952  
128.846  
128.504  
128.428  
128.301  
128.207  
118.797  
118.782  
118.178  
117.897  
114.403  
114.114

80.515  
78.850  
77.425  
77.000  
76.575

51.921  
48.268  
42.525  
42.261  
39.876  
39.735  
39.070  
29.011  
28.233  
28.117  
28.081  
20.412  
20.283

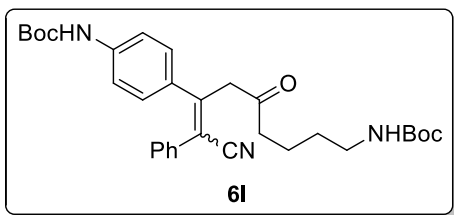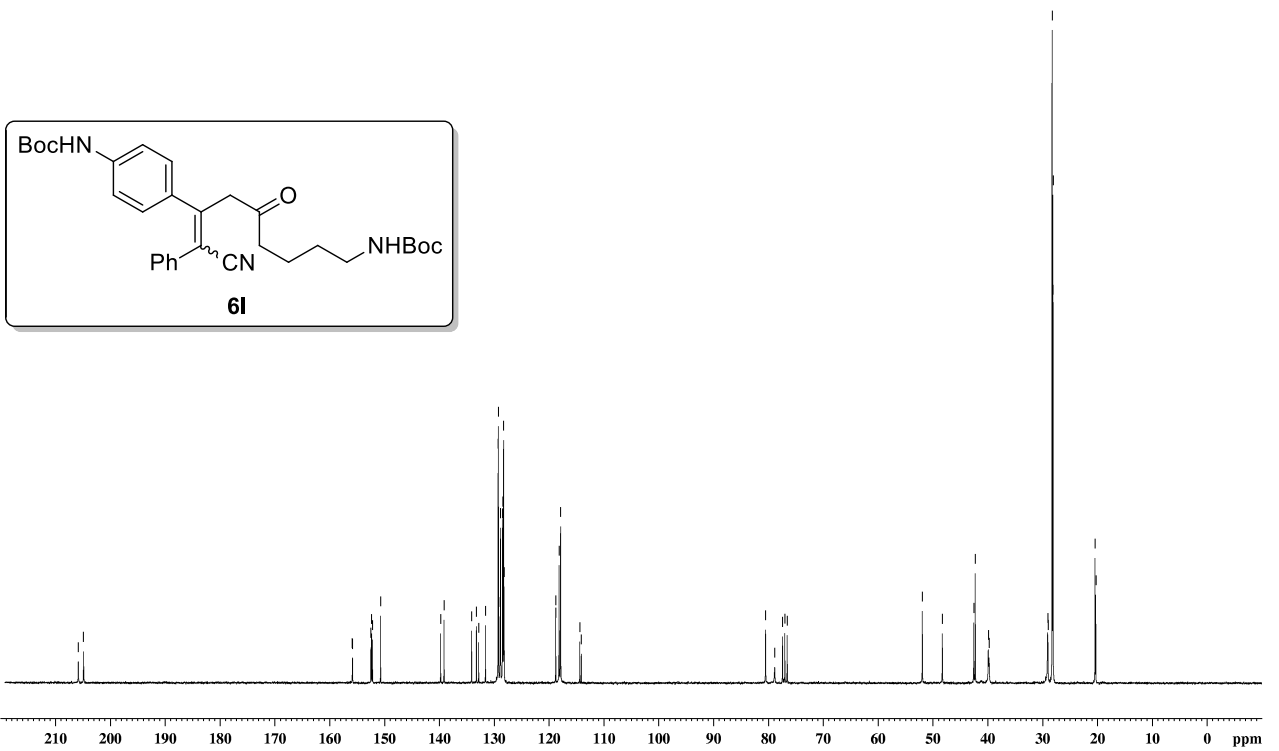



<sup>1</sup>H NMR (300 MHz, CDCl<sub>3</sub>); **6m**

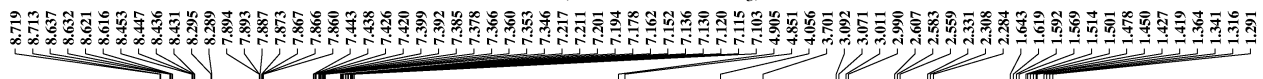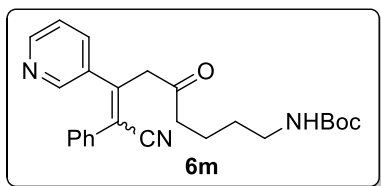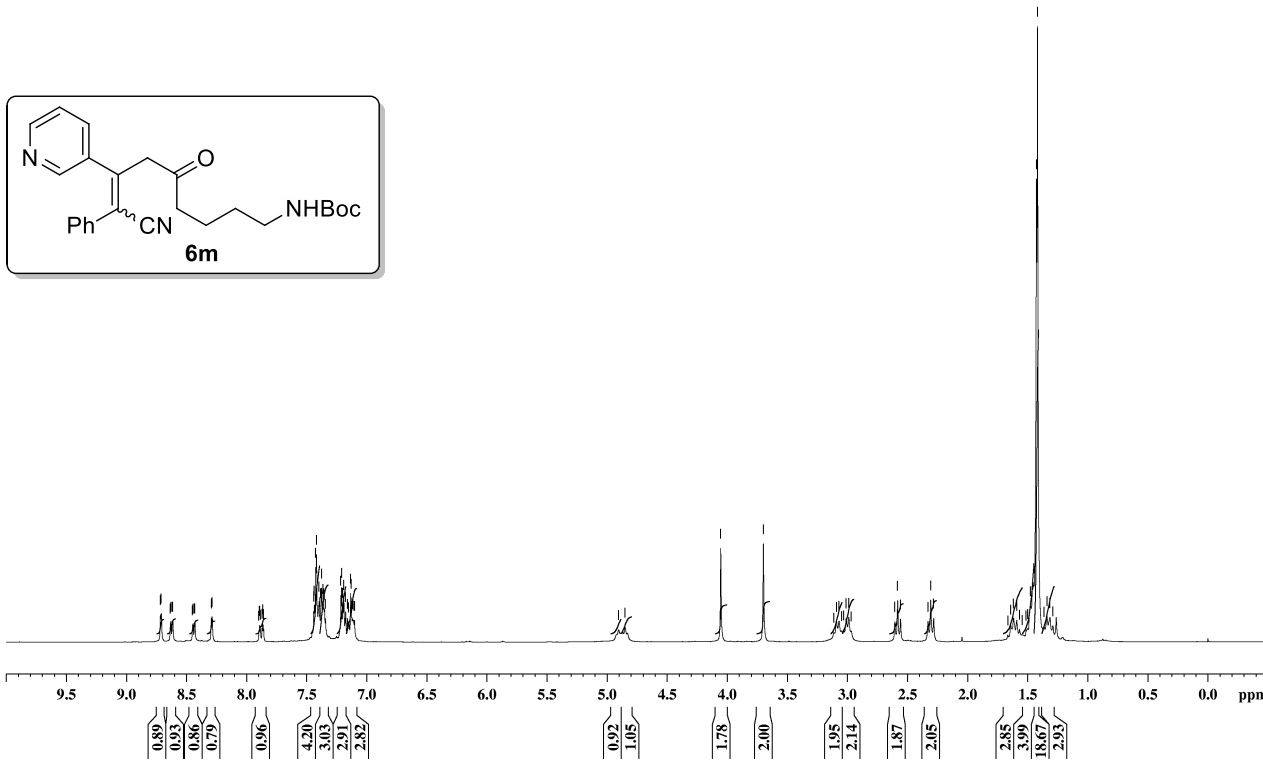

<sup>13</sup>C NMR (75 MHz, CDCl<sub>3</sub>); **6m**

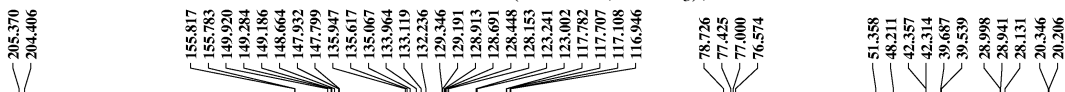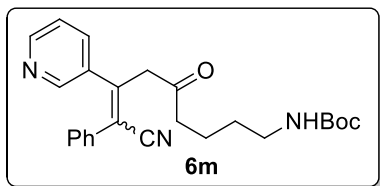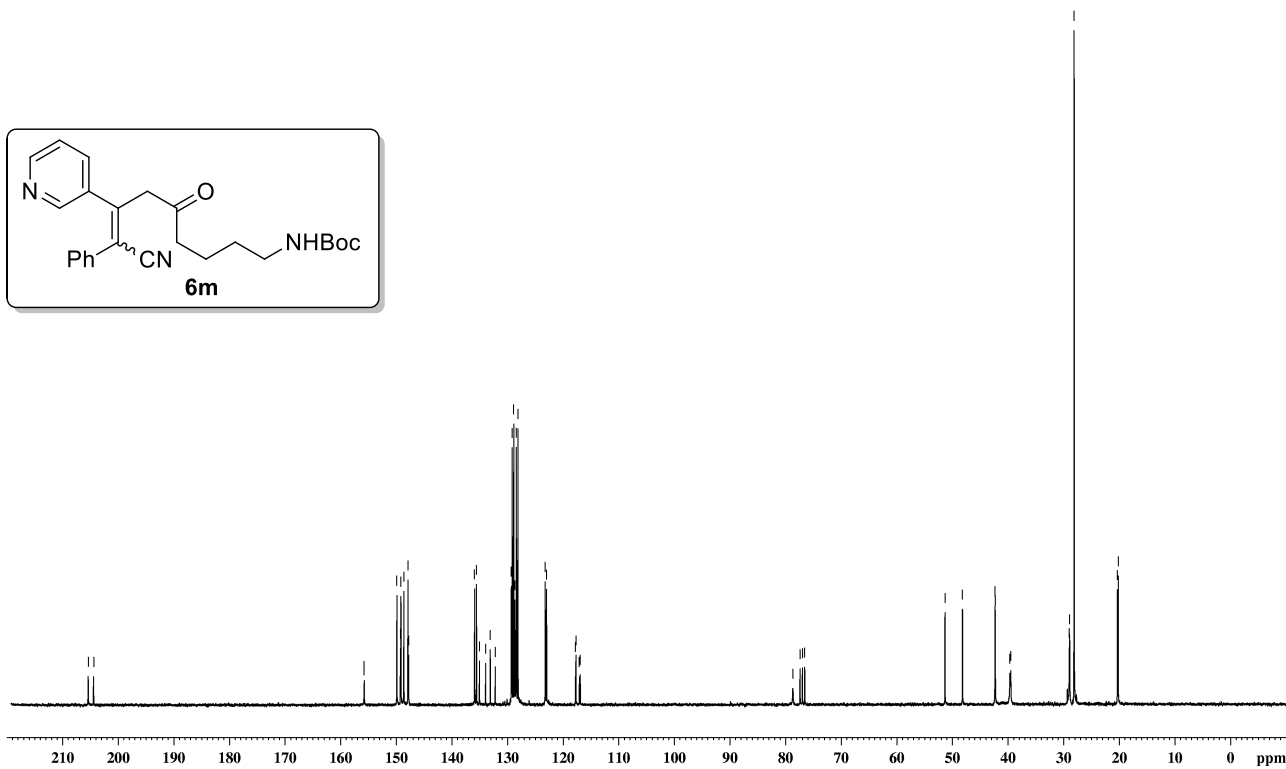

<sup>1</sup>H NMR (300 MHz, CDCl<sub>3</sub>); **6n**

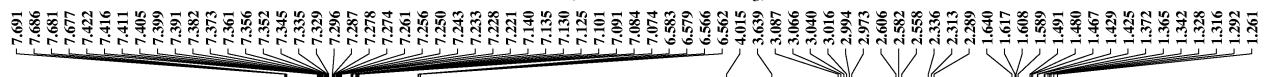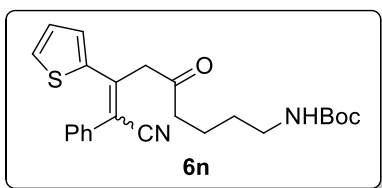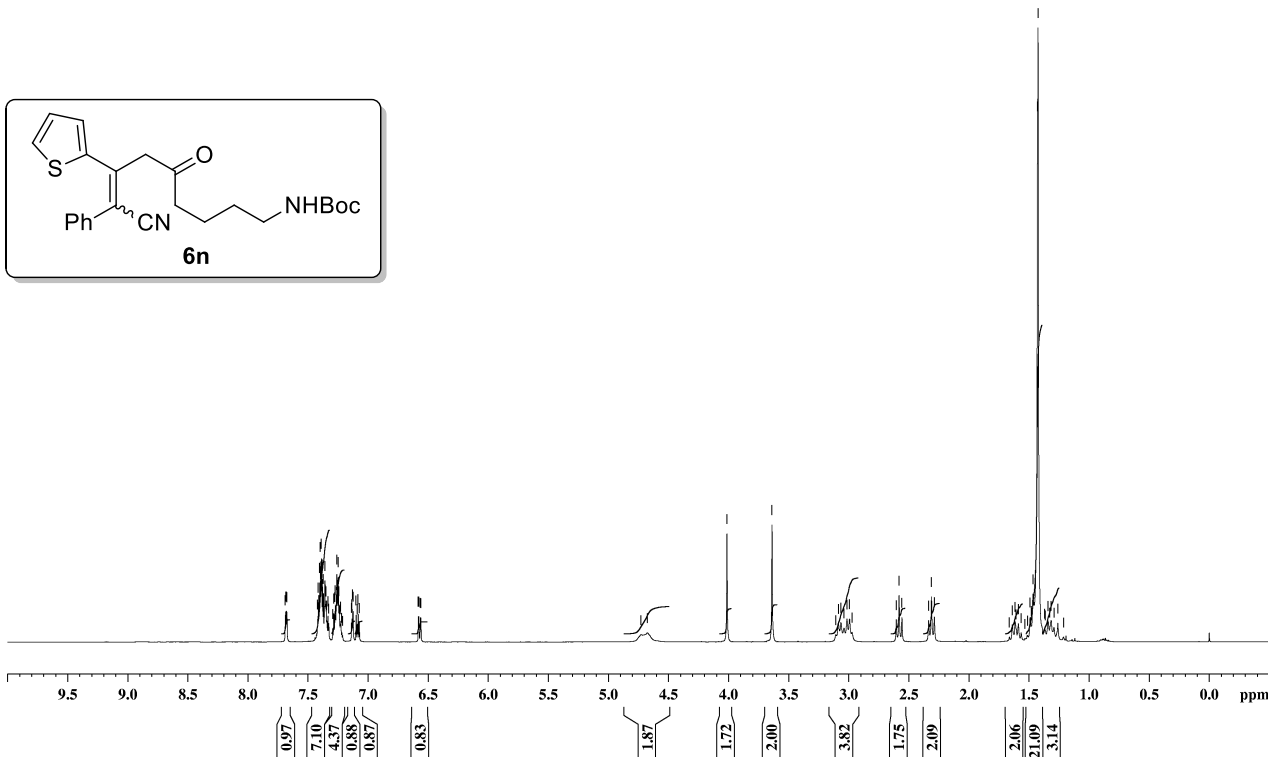

<sup>13</sup>C NMR (75 MHz, CDCl<sub>3</sub>); **6n**

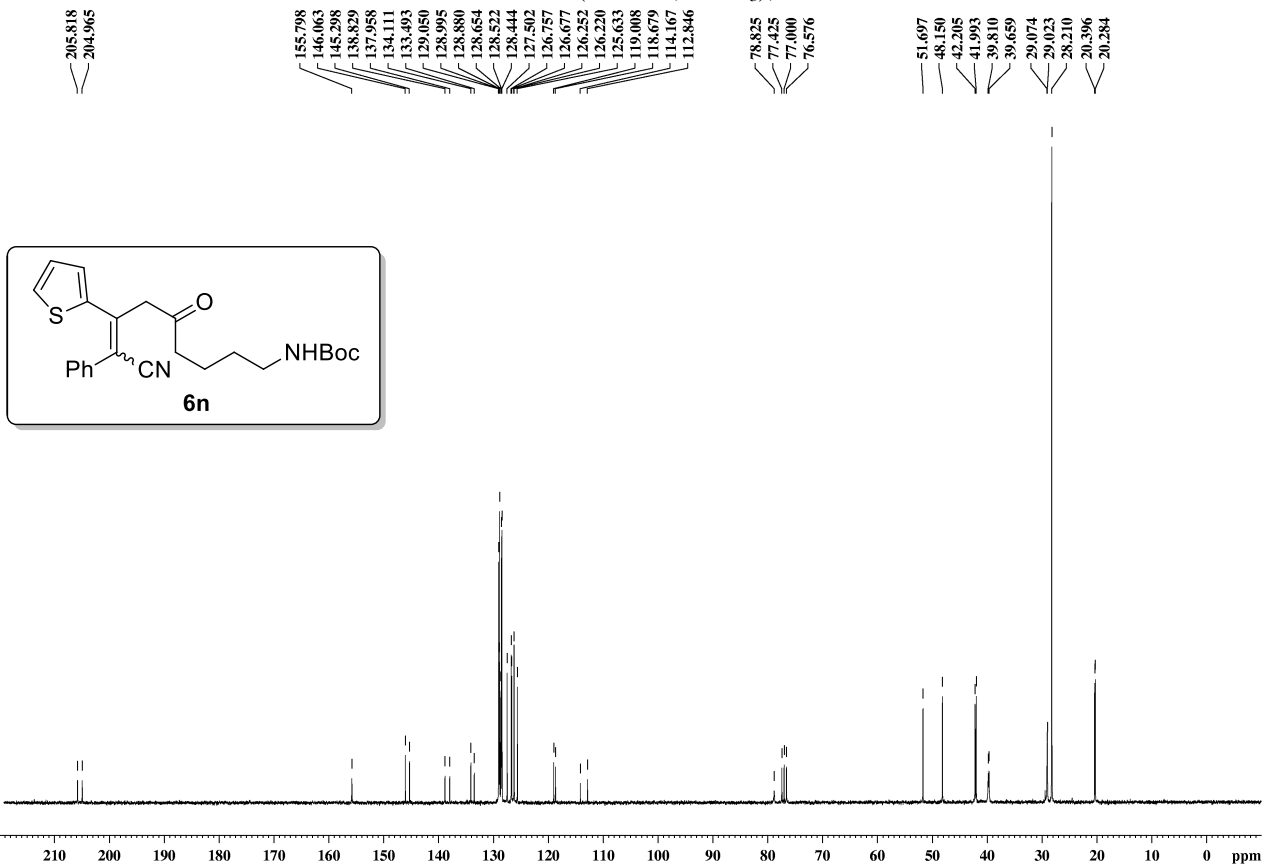

<sup>1</sup>H NMR (300 MHz, CDCl<sub>3</sub>); **6o**

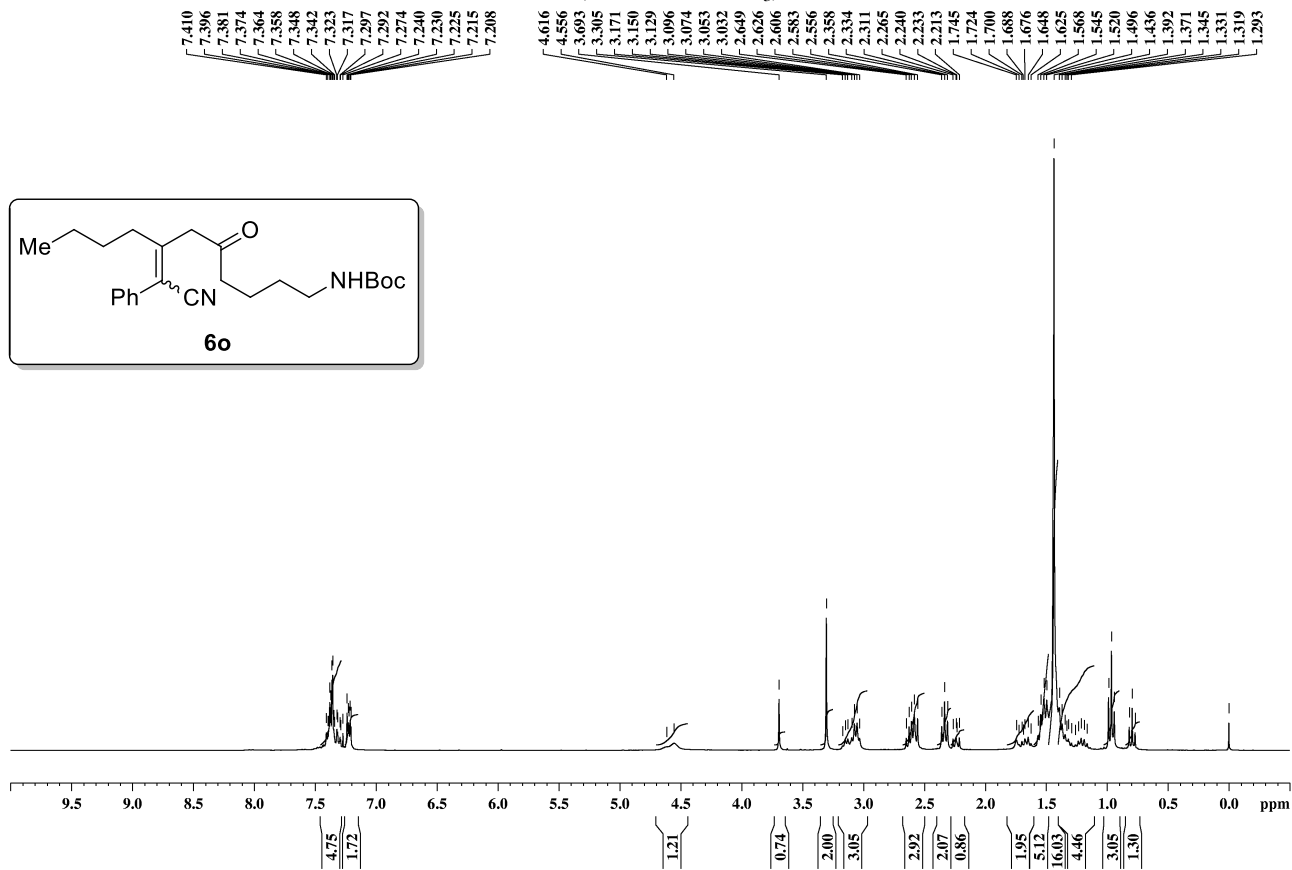

<sup>13</sup>C NMR (75 MHz, CDCl<sub>3</sub>); **6o**

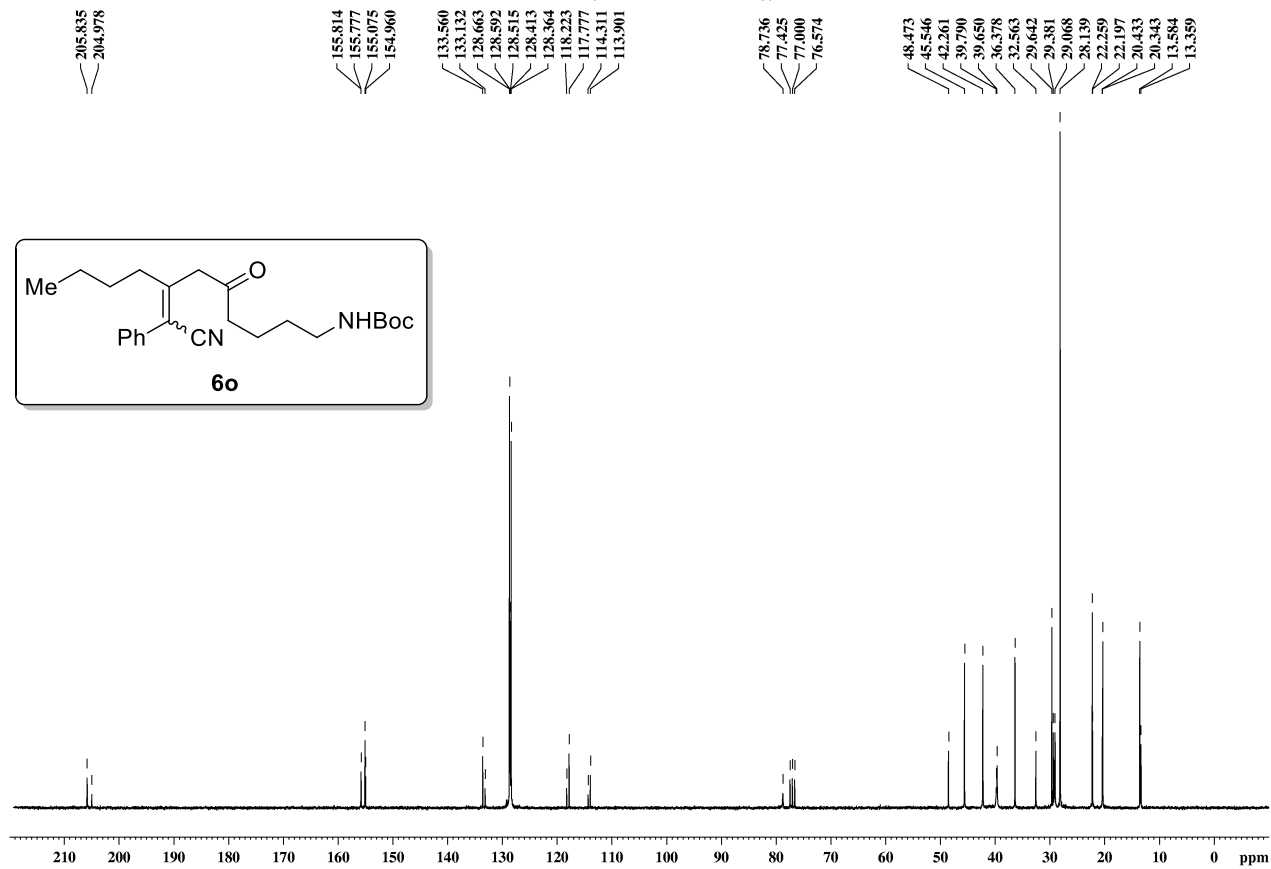

<sup>1</sup>H NMR (300 MHz, CDCl<sub>3</sub>); **6p**

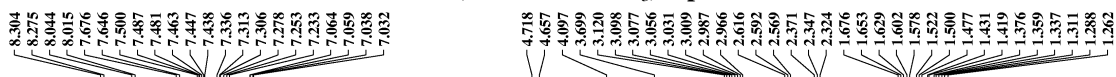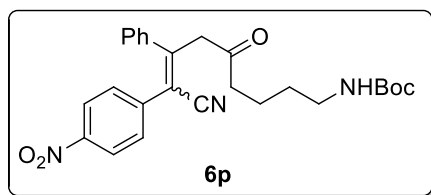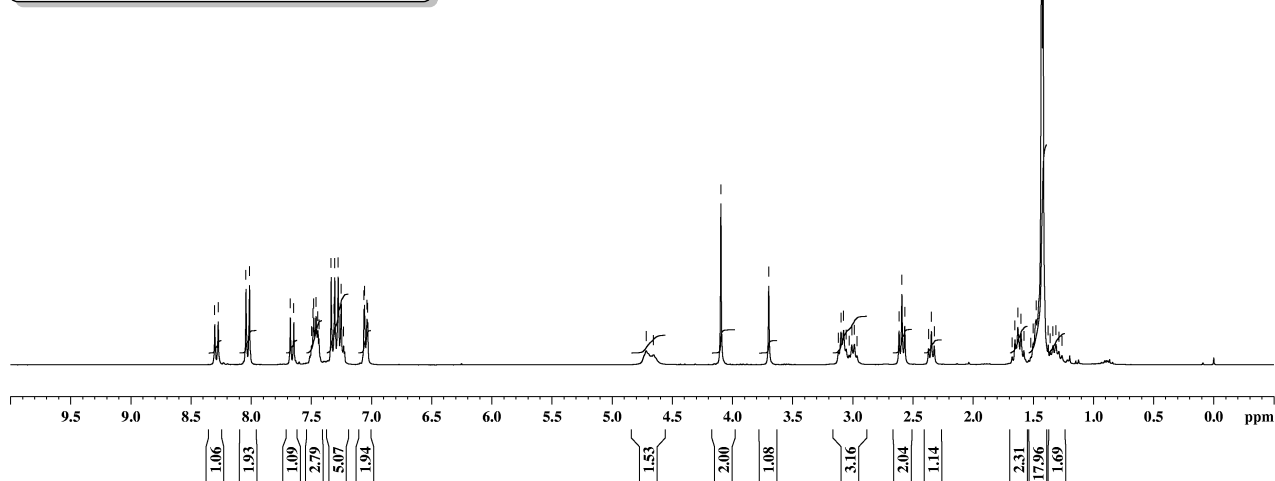

<sup>13</sup>C NMR (75 MHz, CDCl<sub>3</sub>); **6p**

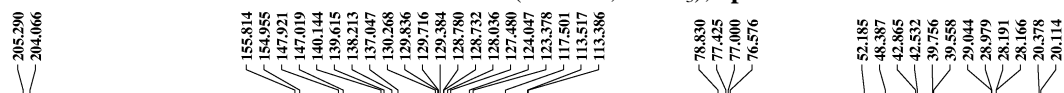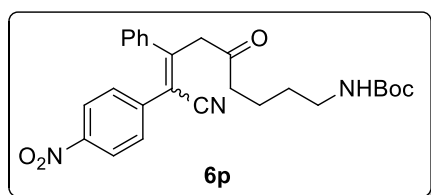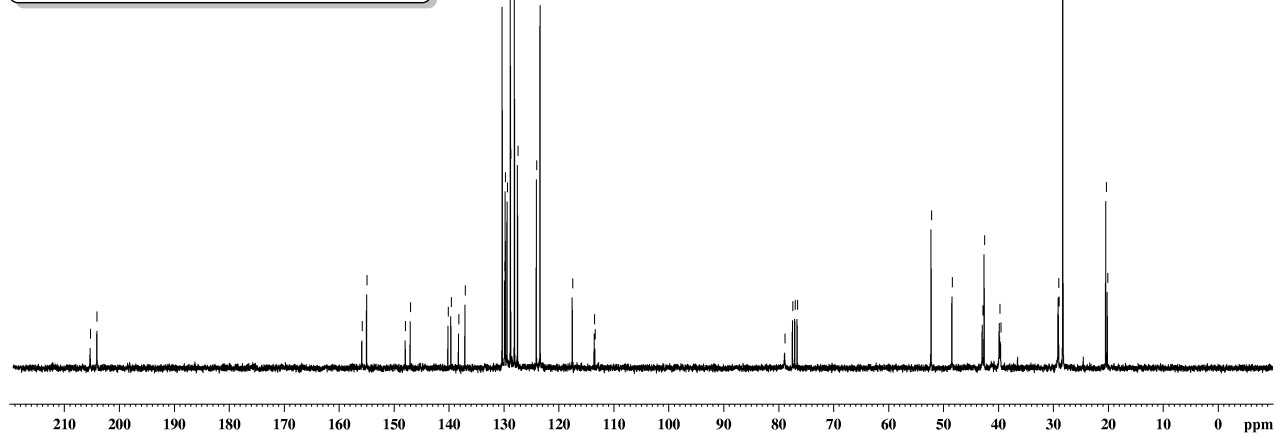

<sup>1</sup>H NMR (300 MHz, CDCl<sub>3</sub>); **6q**

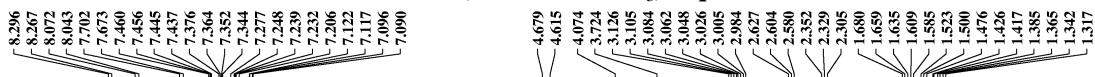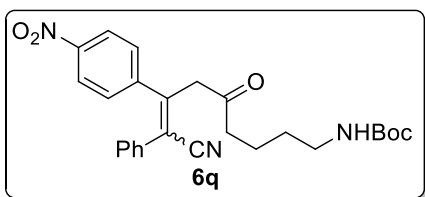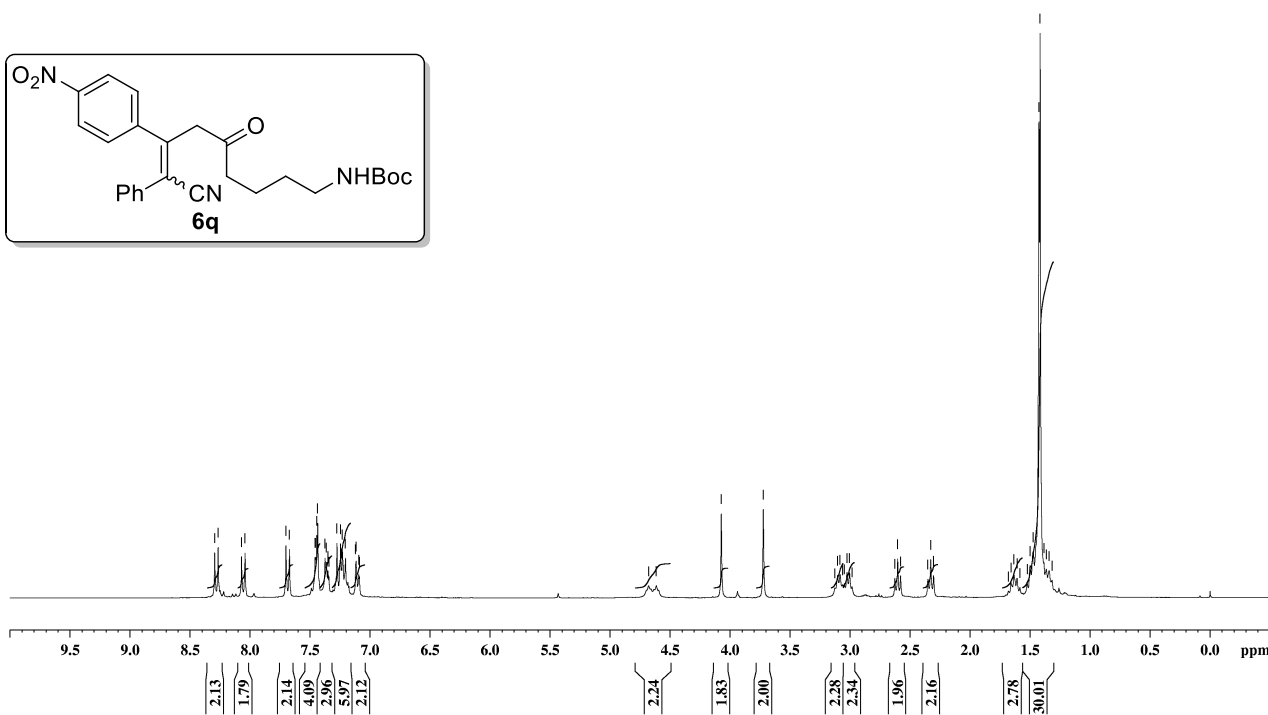

<sup>13</sup>C NMR (75 MHz, CDCl<sub>3</sub>); **6q**

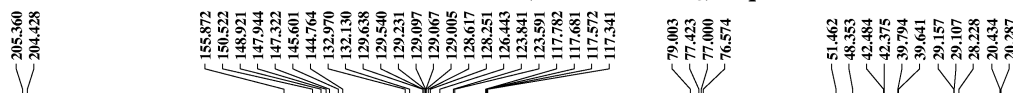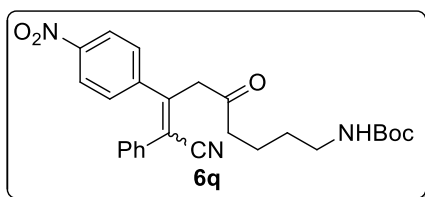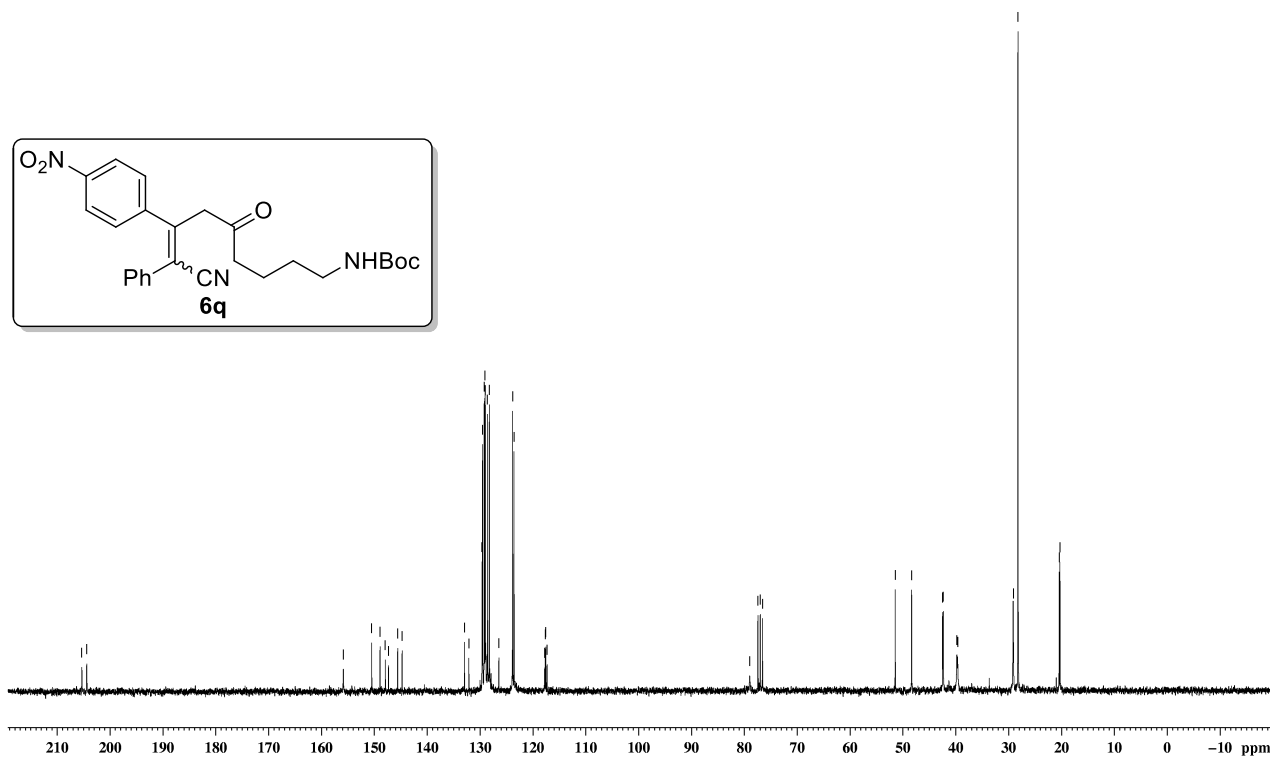

<sup>1</sup>H NMR (300 MHz, CDCl<sub>3</sub>); **6r**

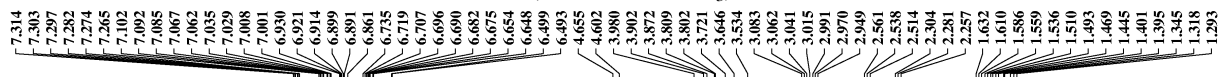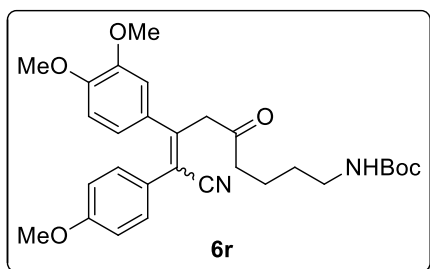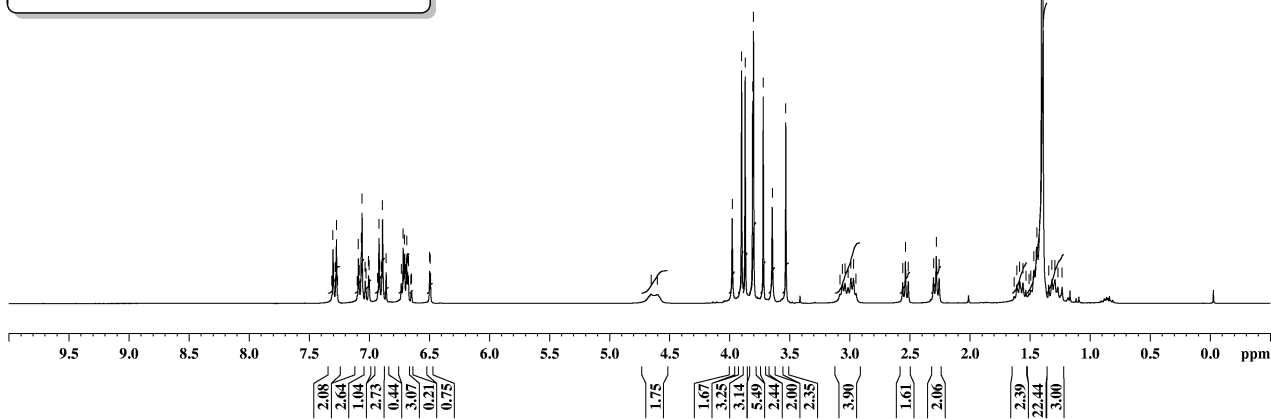

<sup>13</sup>C NMR (75 MHz, CDCl<sub>3</sub>); **6r**

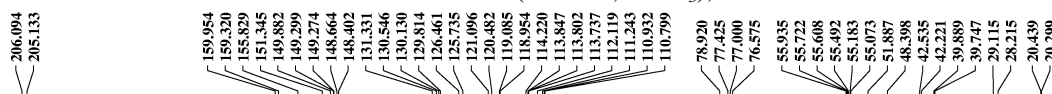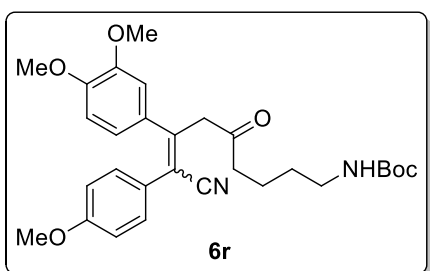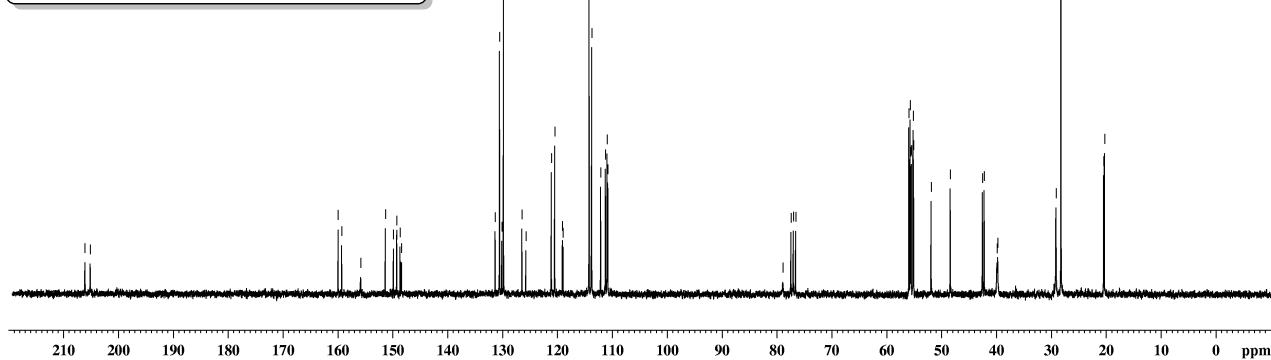

<sup>1</sup>H NMR (300 MHz, CDCl<sub>3</sub>); **4c**

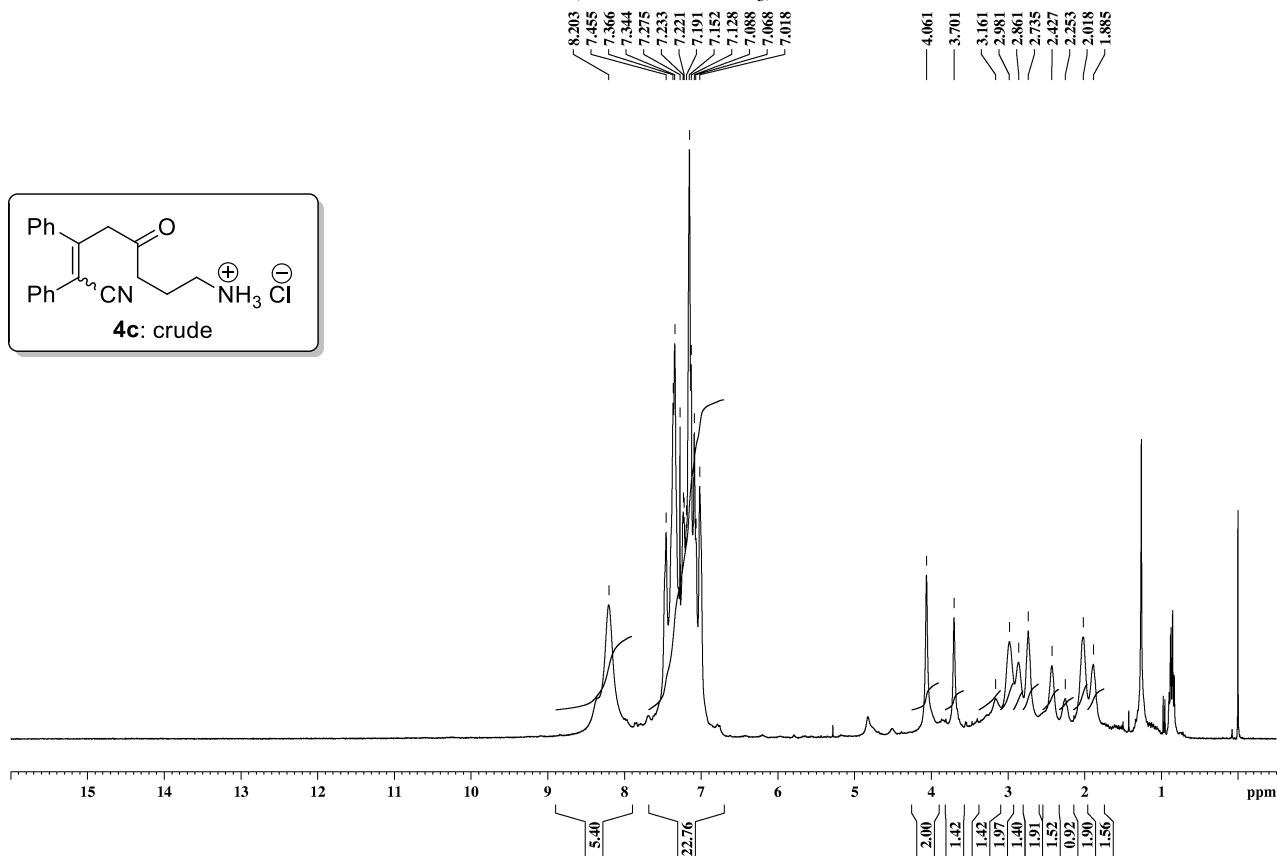

<sup>13</sup>C NMR (75 MHz, CDCl<sub>3</sub>); **4c**

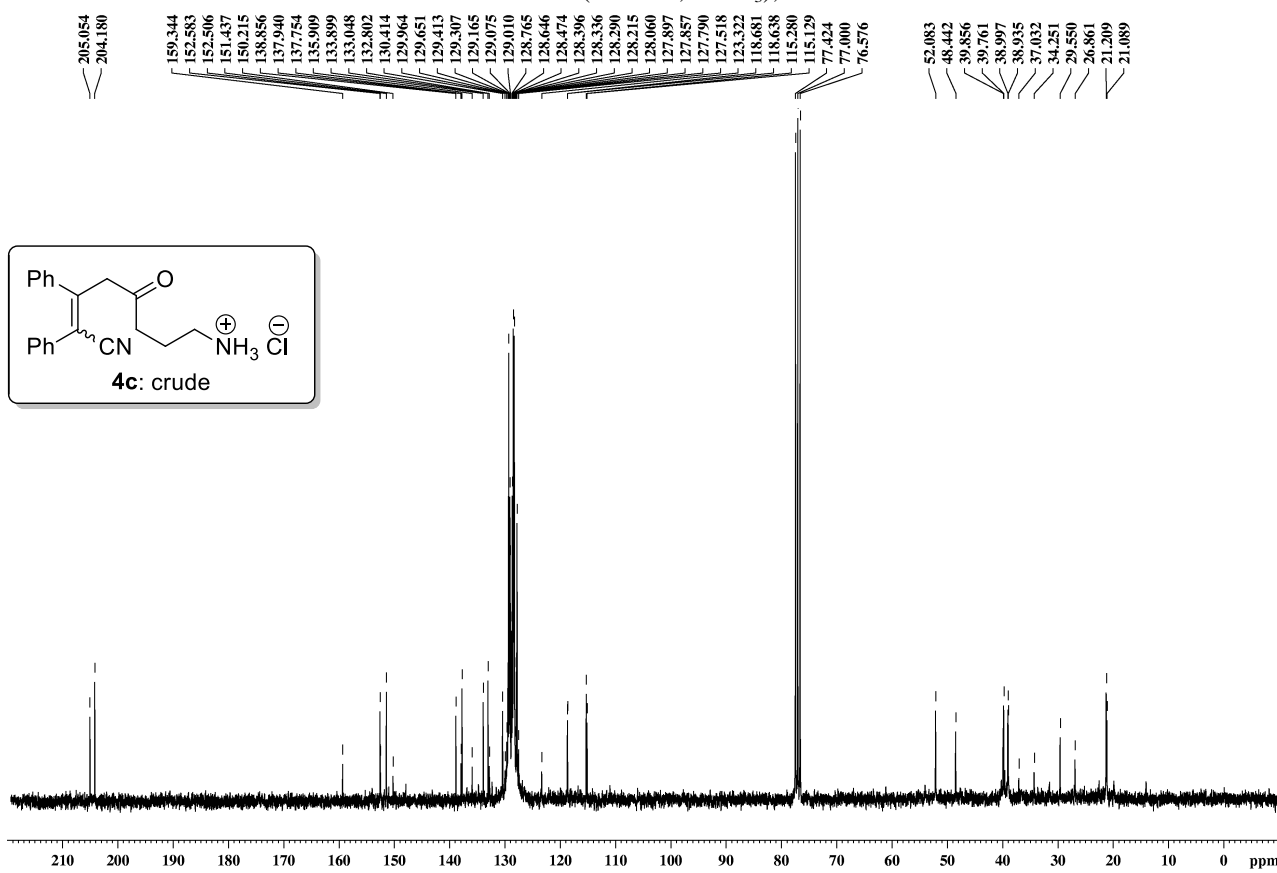

<sup>1</sup>H NMR (300 MHz, CDCl<sub>3</sub>); **5a**

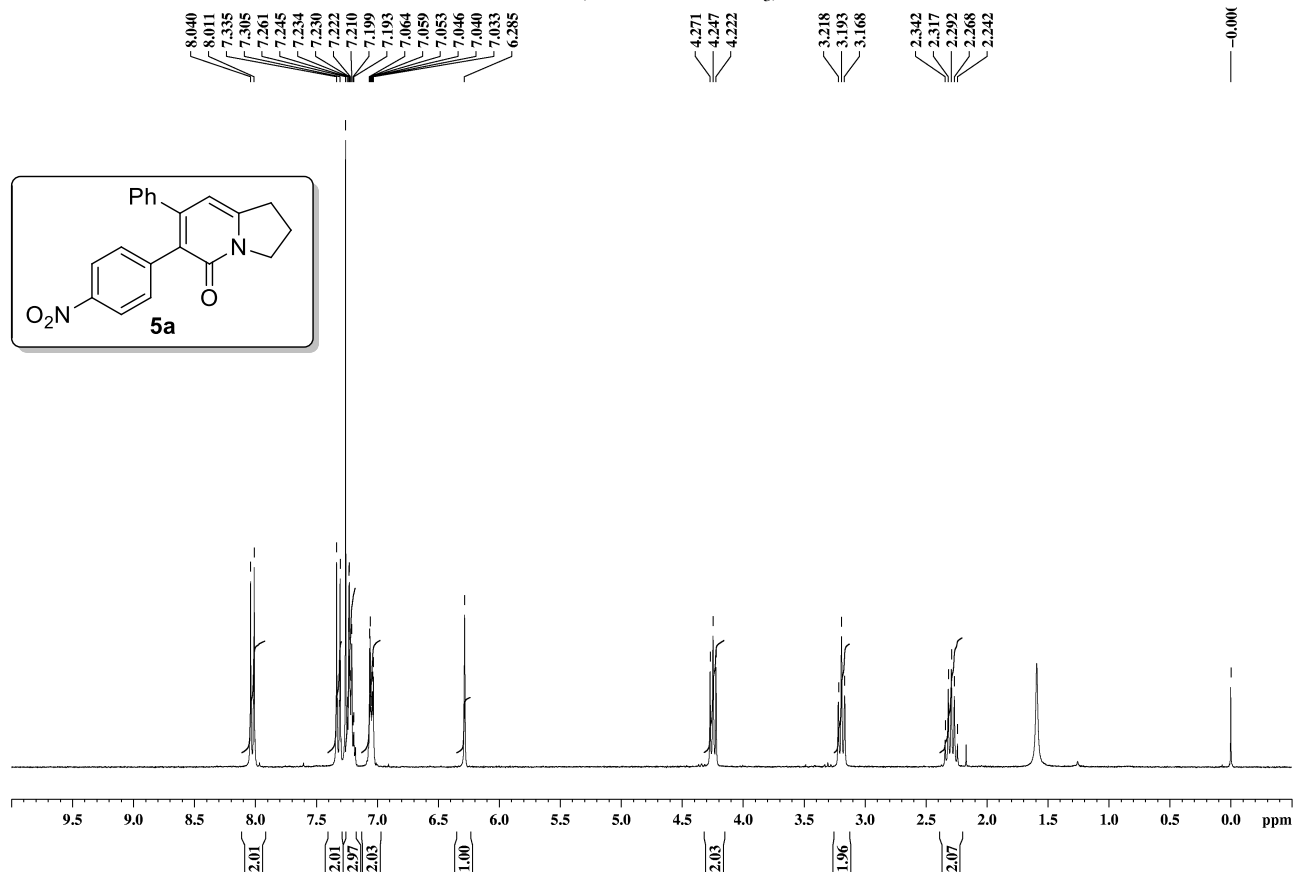

<sup>13</sup>C NMR (75 MHz, CDCl<sub>3</sub>); **5a**

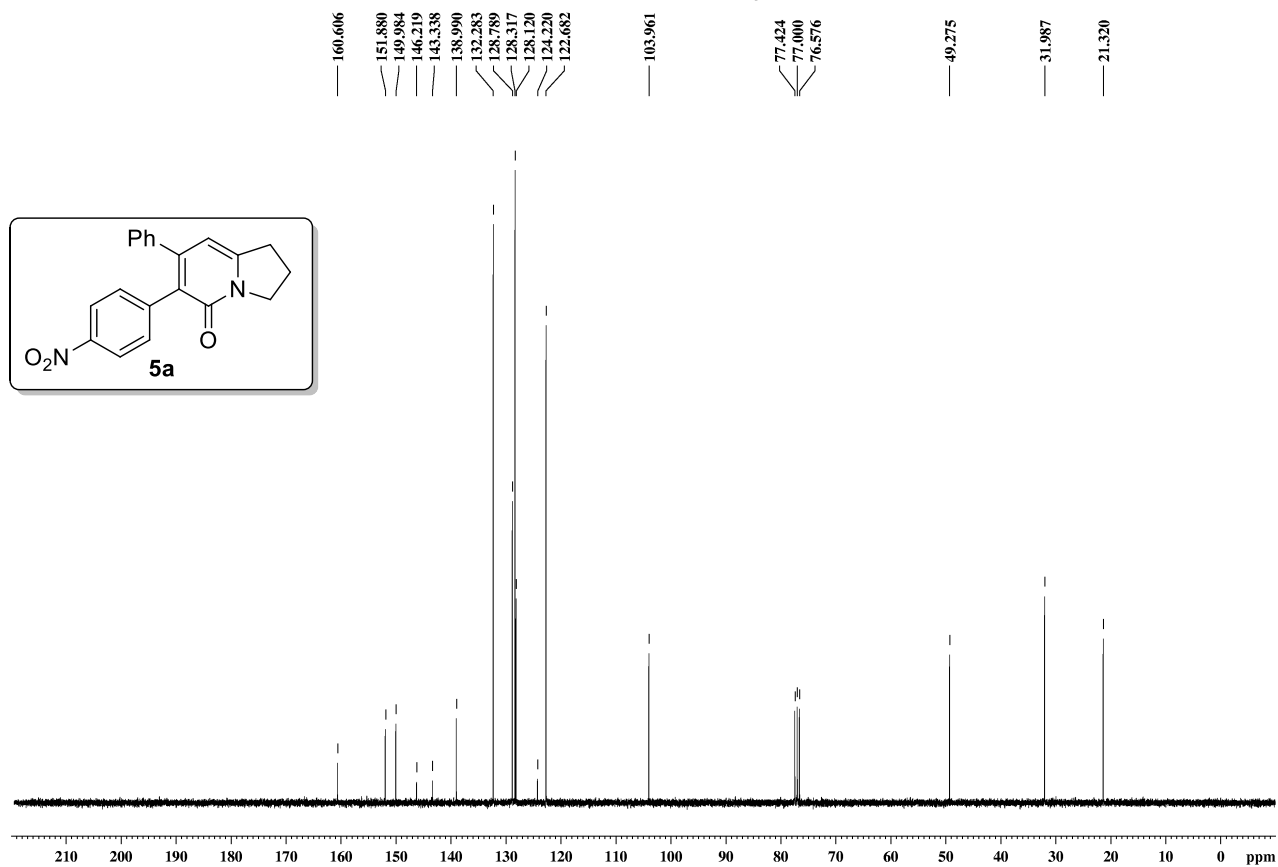



<sup>1</sup>H NMR (300 MHz, CDCl<sub>3</sub>); **5b**

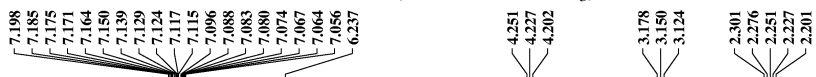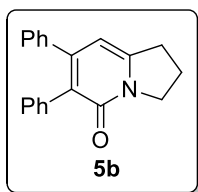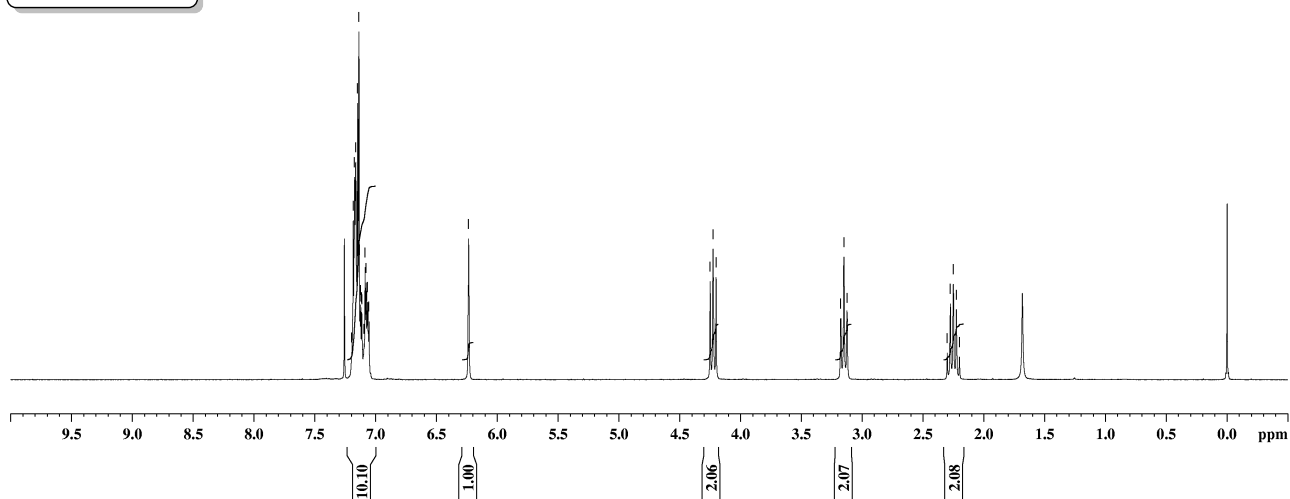

<sup>13</sup>C NMR (75 MHz, CDCl<sub>3</sub>); **5b**

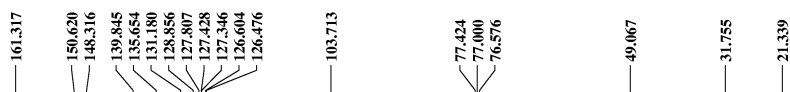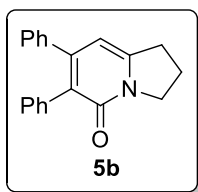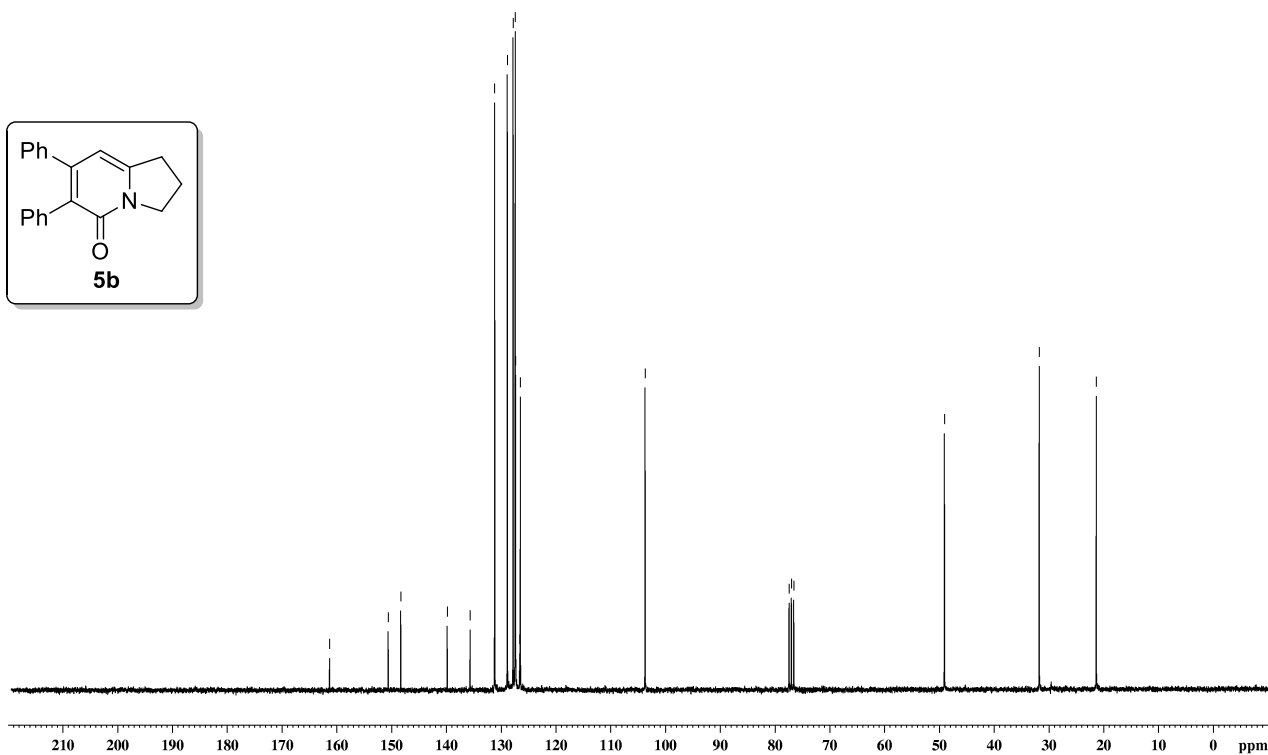

$^1\text{H}$  NMR (300 MHz,  $\text{CDCl}_3$ ); **5c**

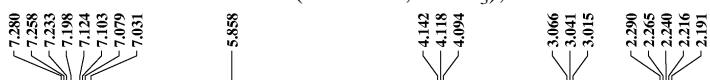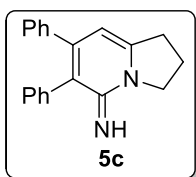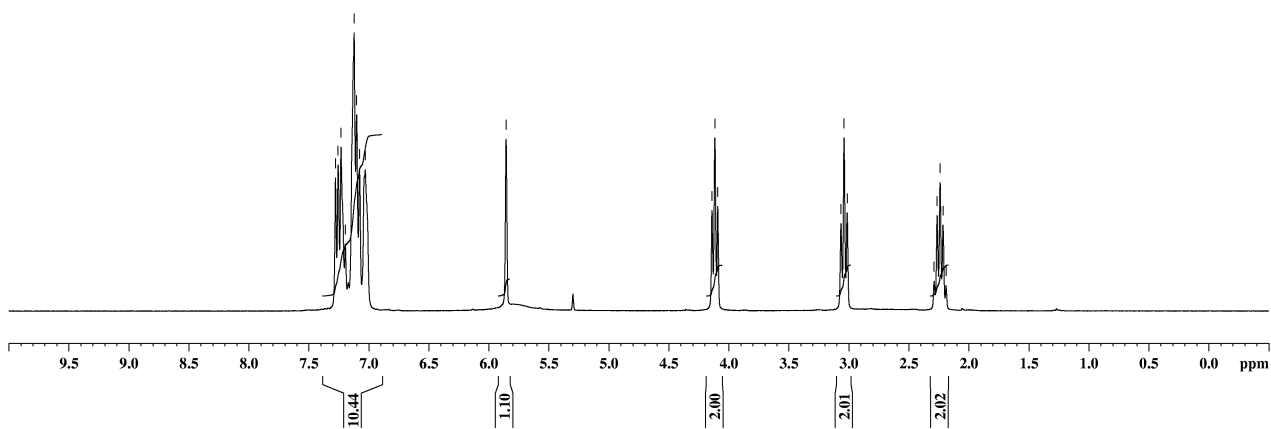

$^{13}\text{C}$  NMR (75 MHz,  $\text{CDCl}_3$ ); **5c**

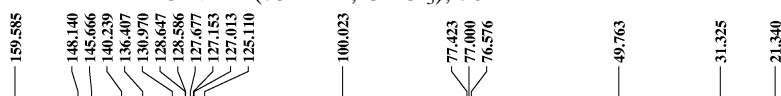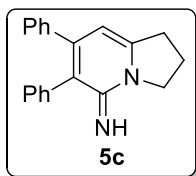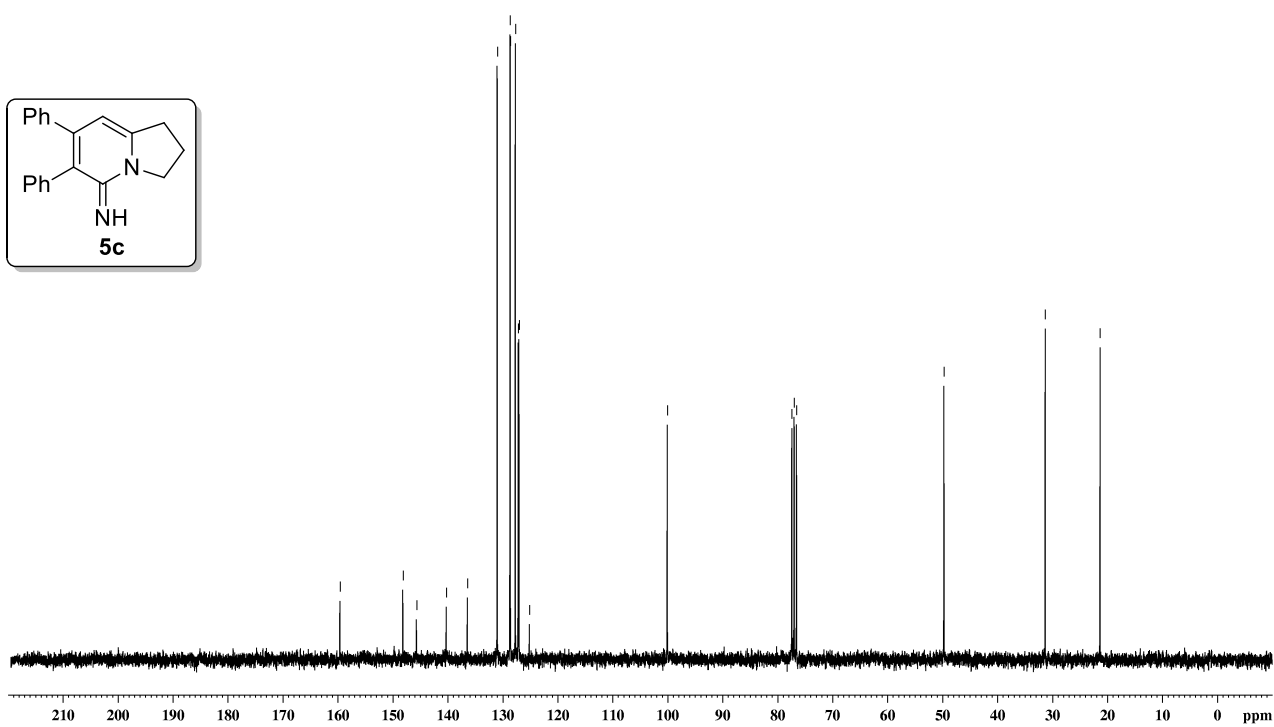

<sup>1</sup>H NMR (300 MHz, CDCl<sub>3</sub>); **5d**

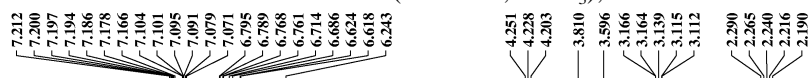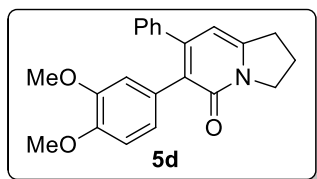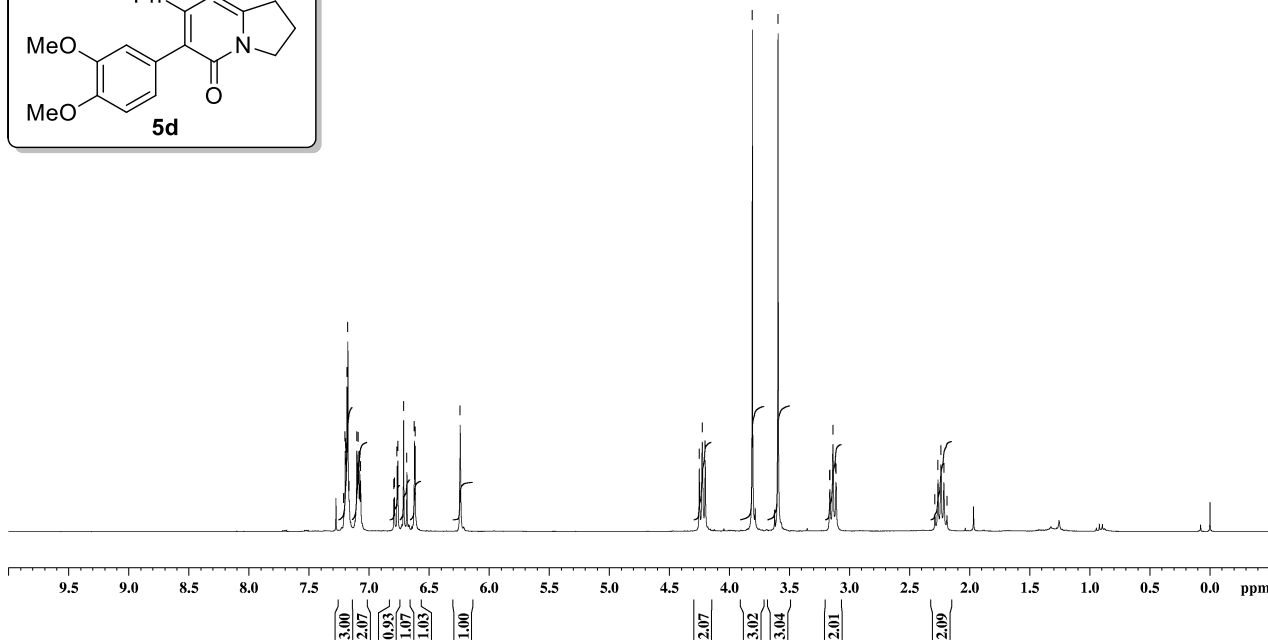

<sup>13</sup>C NMR (75 MHz, CDCl<sub>3</sub>); **5d**

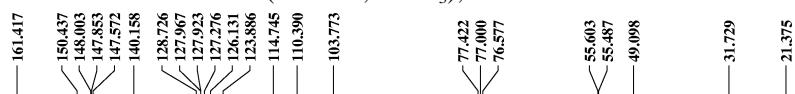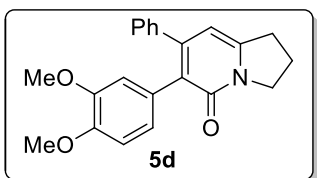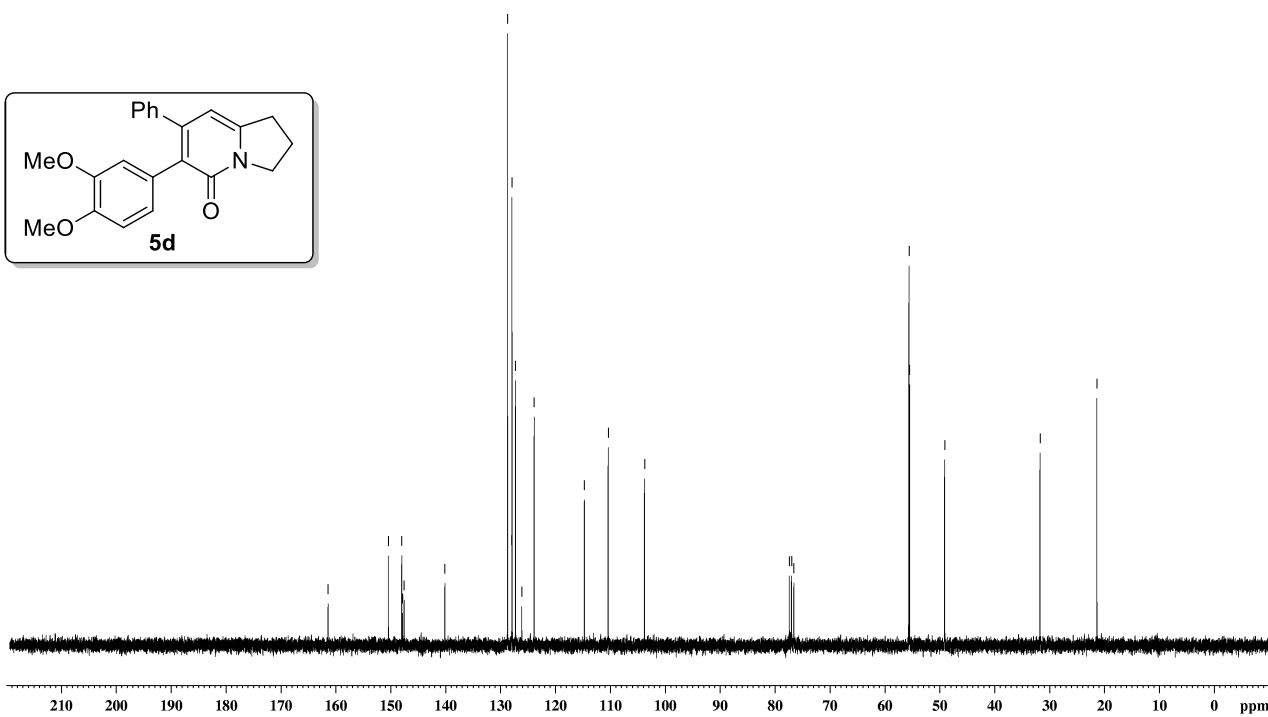

<sup>1</sup>H NMR (300 MHz, CDCl<sub>3</sub>); **5e**

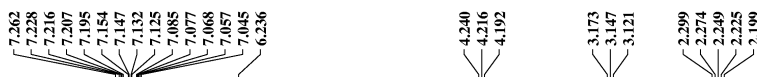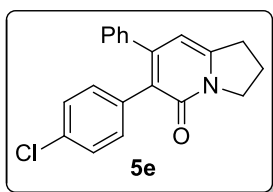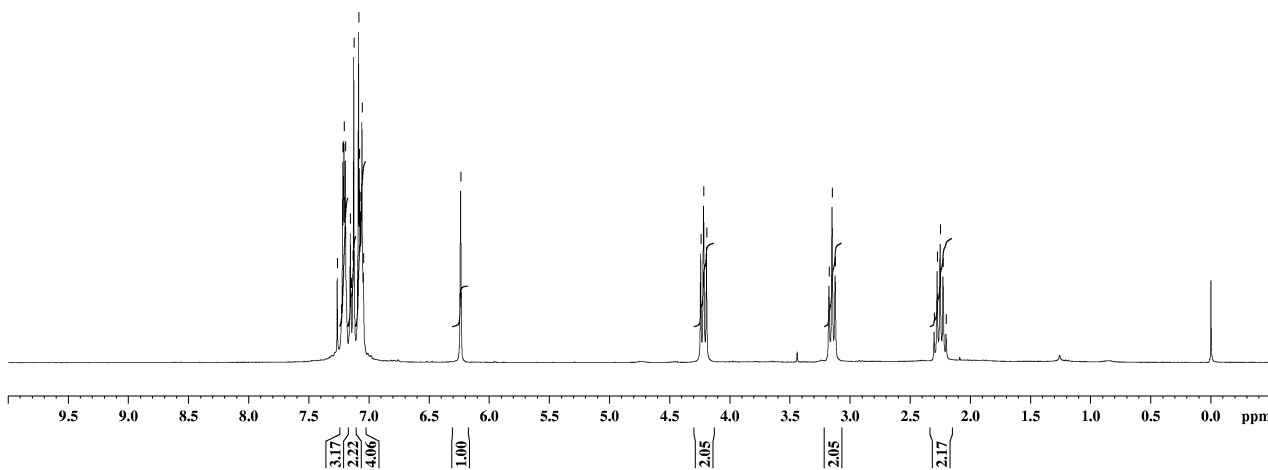

<sup>13</sup>C NMR (75 MHz, CDCl<sub>3</sub>); **5e**

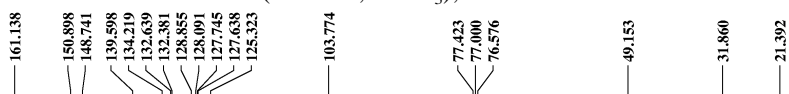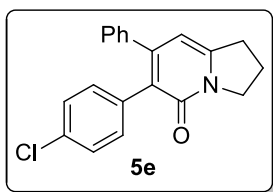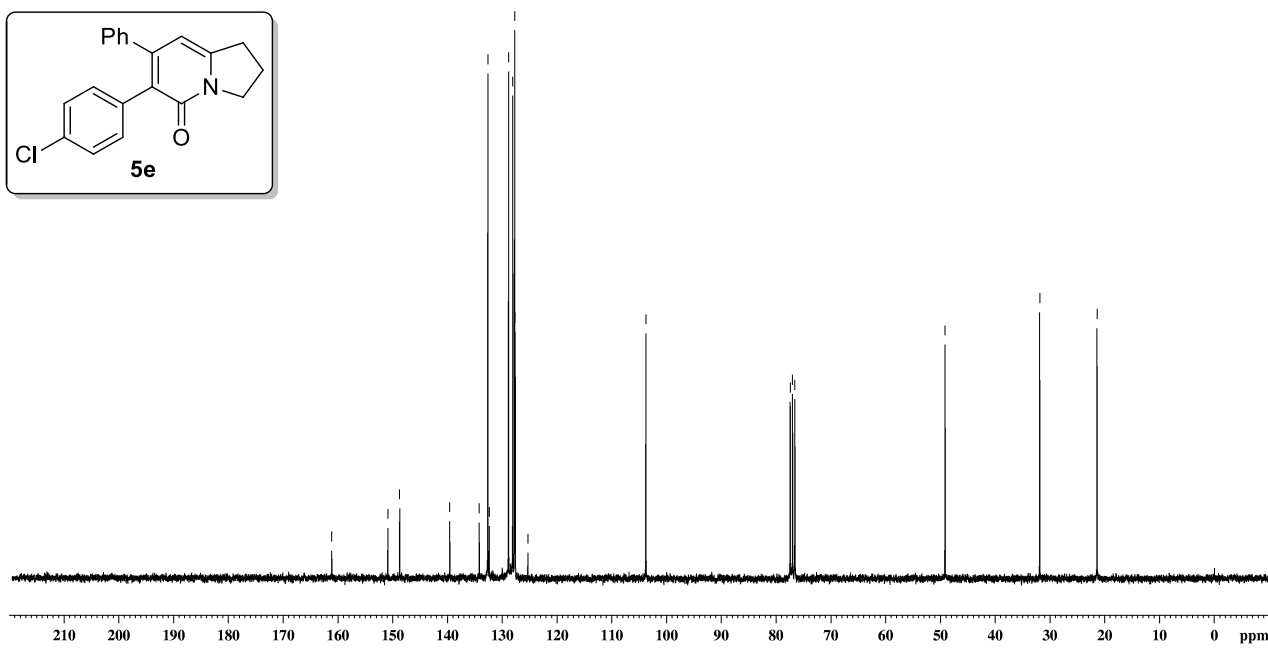

<sup>1</sup>H NMR (300 MHz, CDCl<sub>3</sub>); **5f**

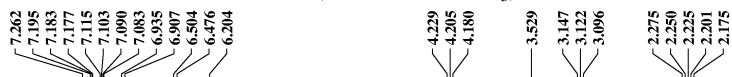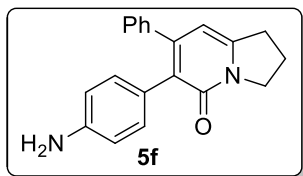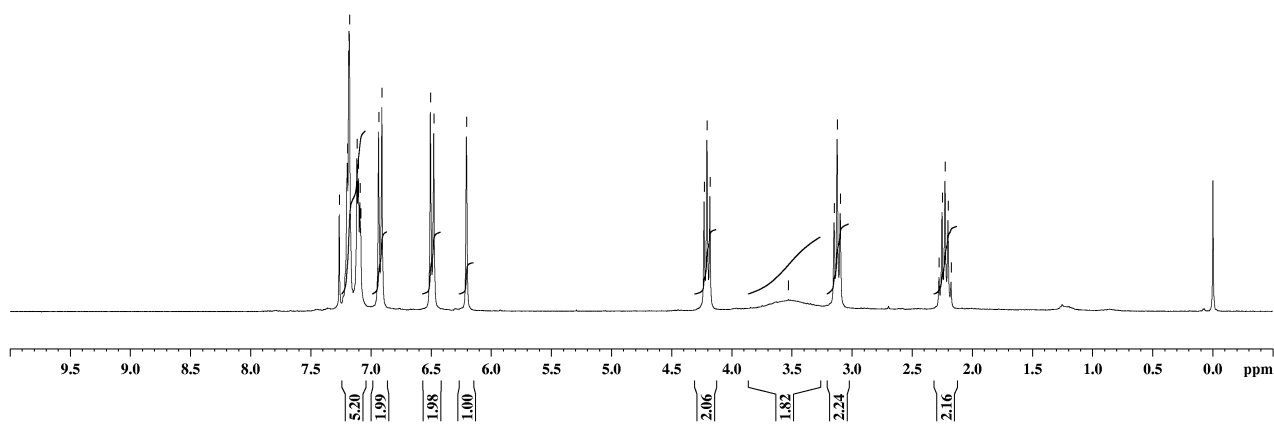

<sup>13</sup>C NMR (75 MHz, CDCl<sub>3</sub>); **5f**

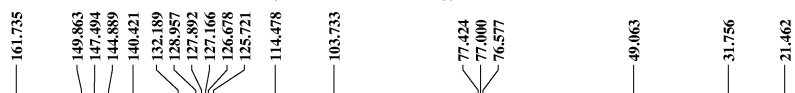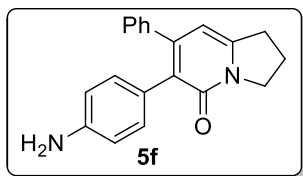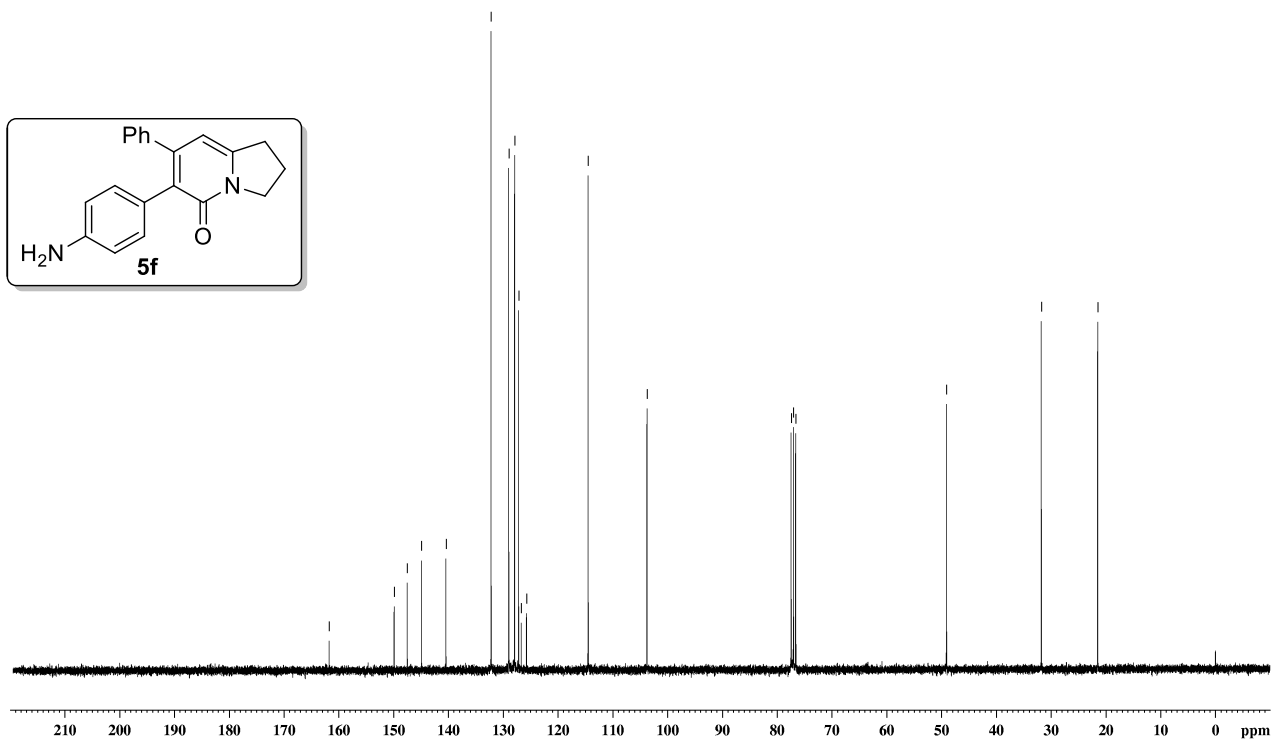

<sup>1</sup>H NMR (300 MHz, CDCl<sub>3</sub>); **5g**

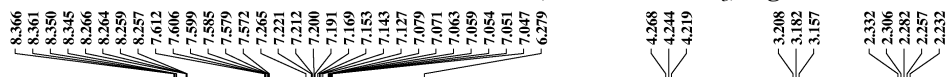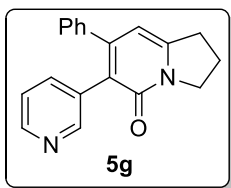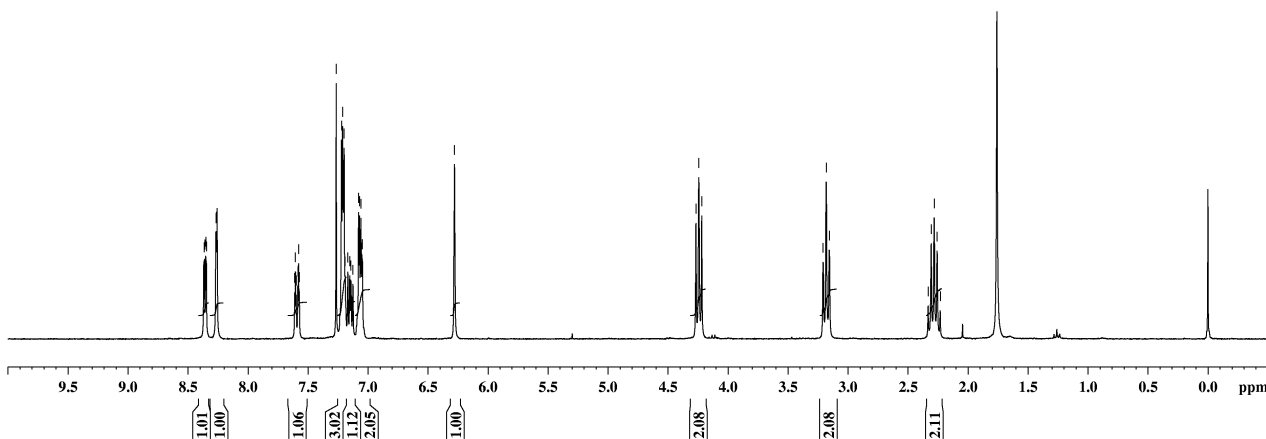

<sup>13</sup>C NMR (75 MHz, CDCl<sub>3</sub>); **5g**

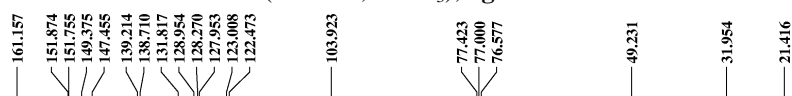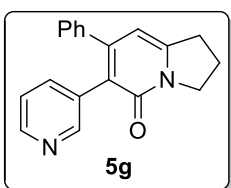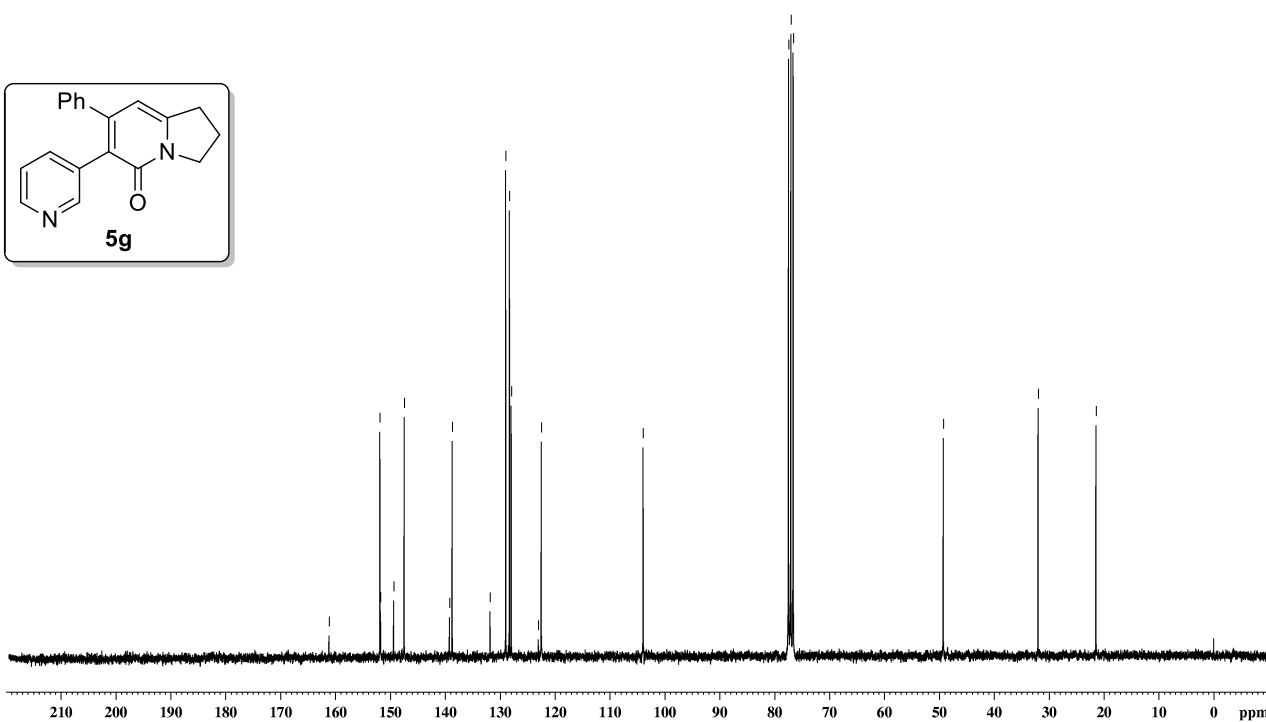

<sup>1</sup>H NMR (300 MHz, CDCl<sub>3</sub>); **5h**

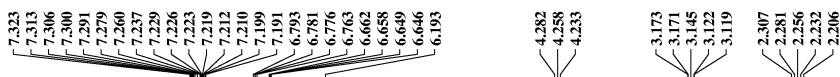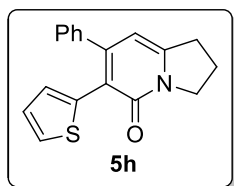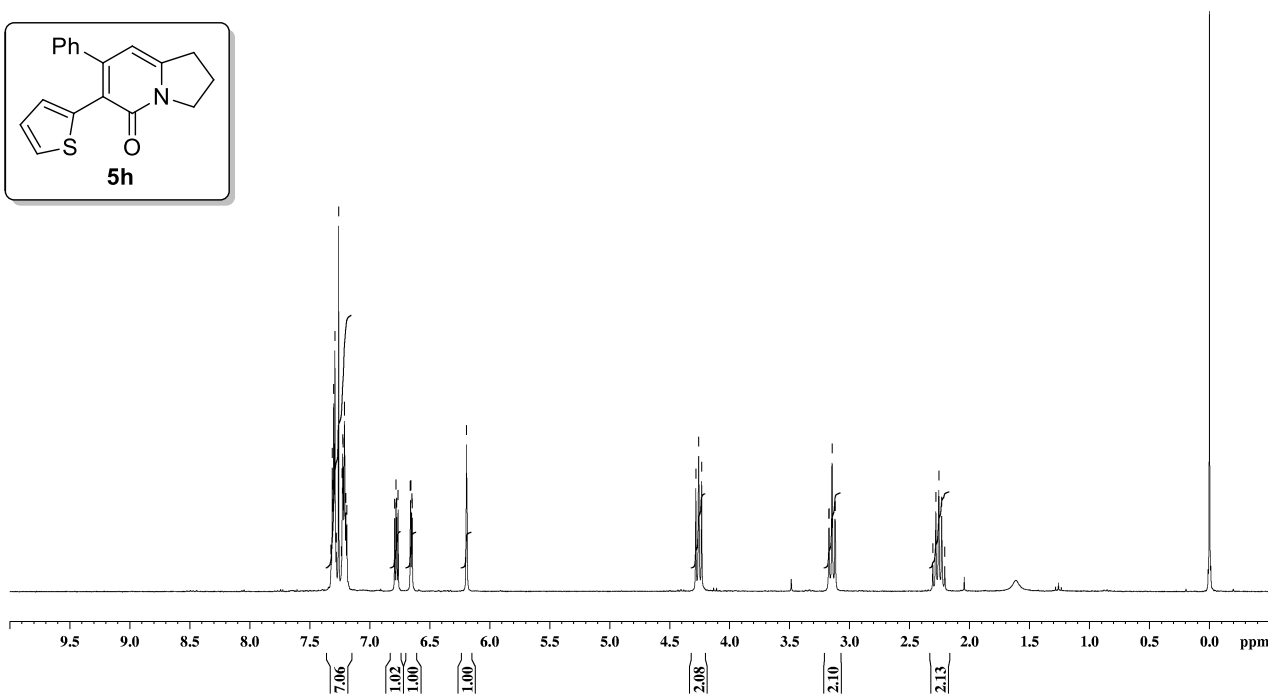

<sup>13</sup>C NMR (75 MHz, CDCl<sub>3</sub>); **5h**

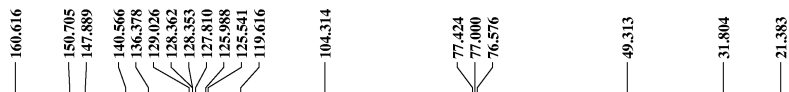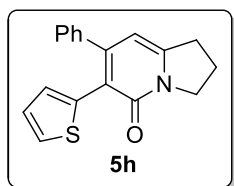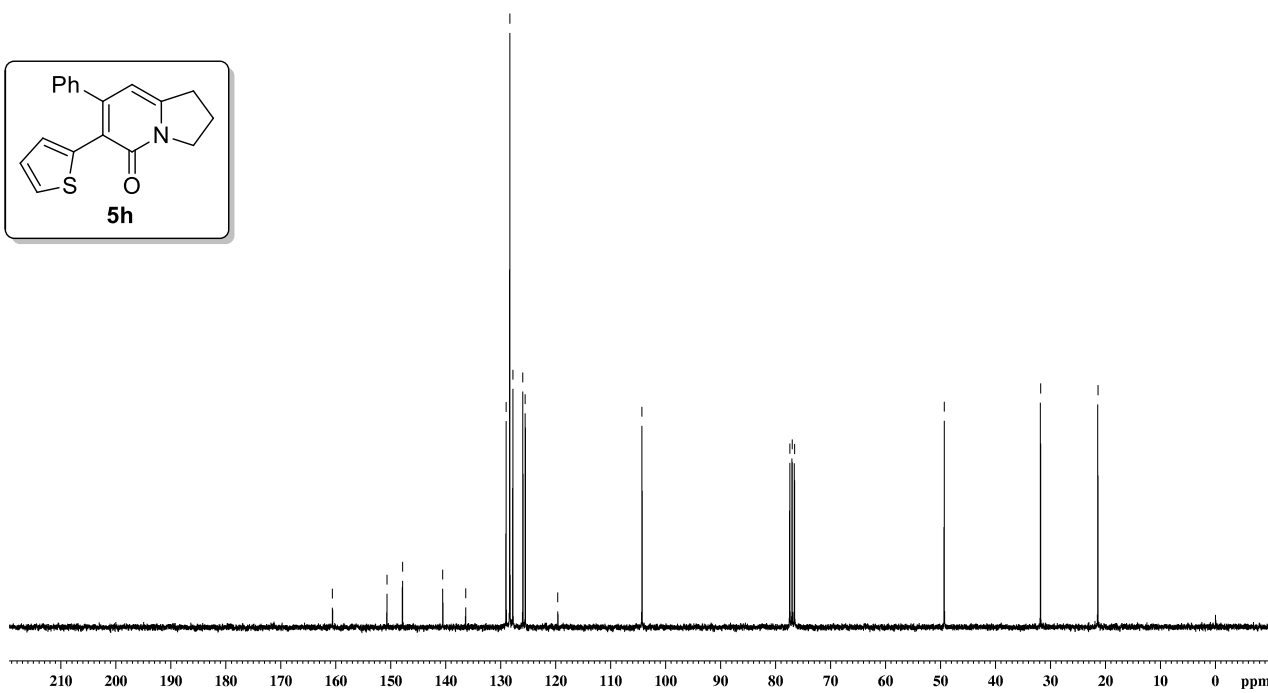

<sup>1</sup>H NMR (300 MHz, CDCl<sub>3</sub>); **5i**

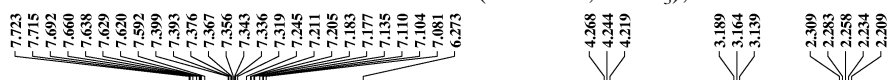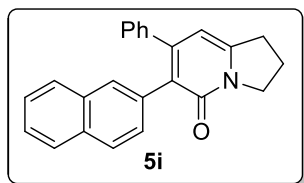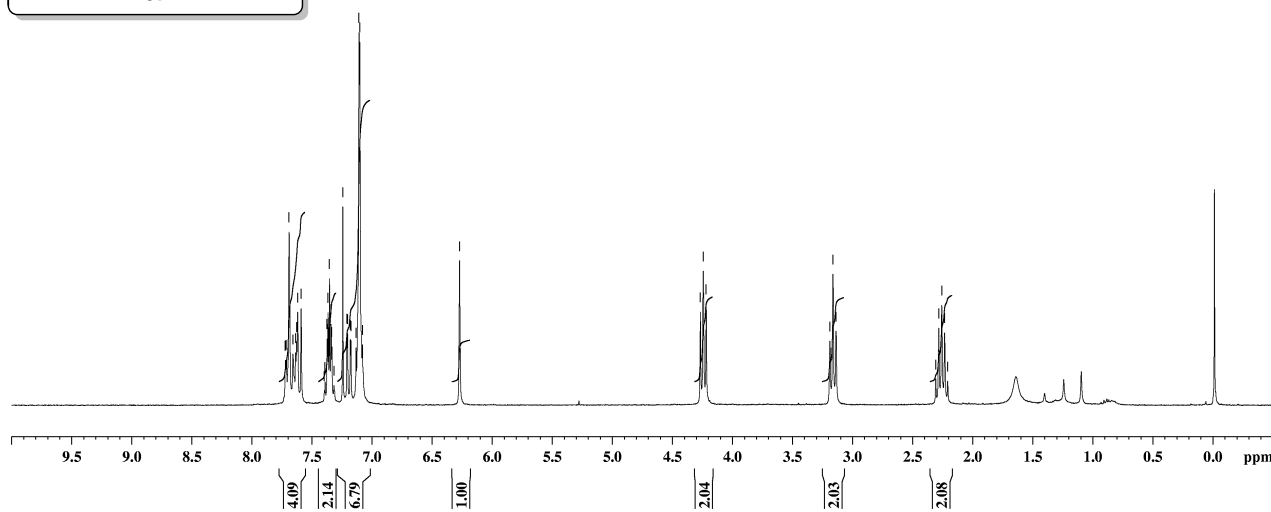

<sup>13</sup>C NMR (75 MHz, CDCl<sub>3</sub>); **5i**

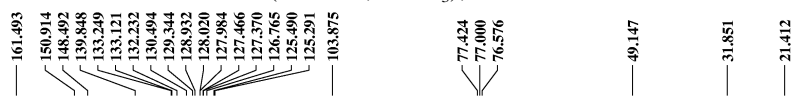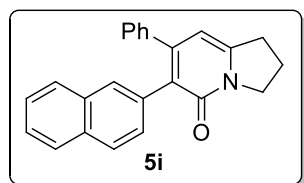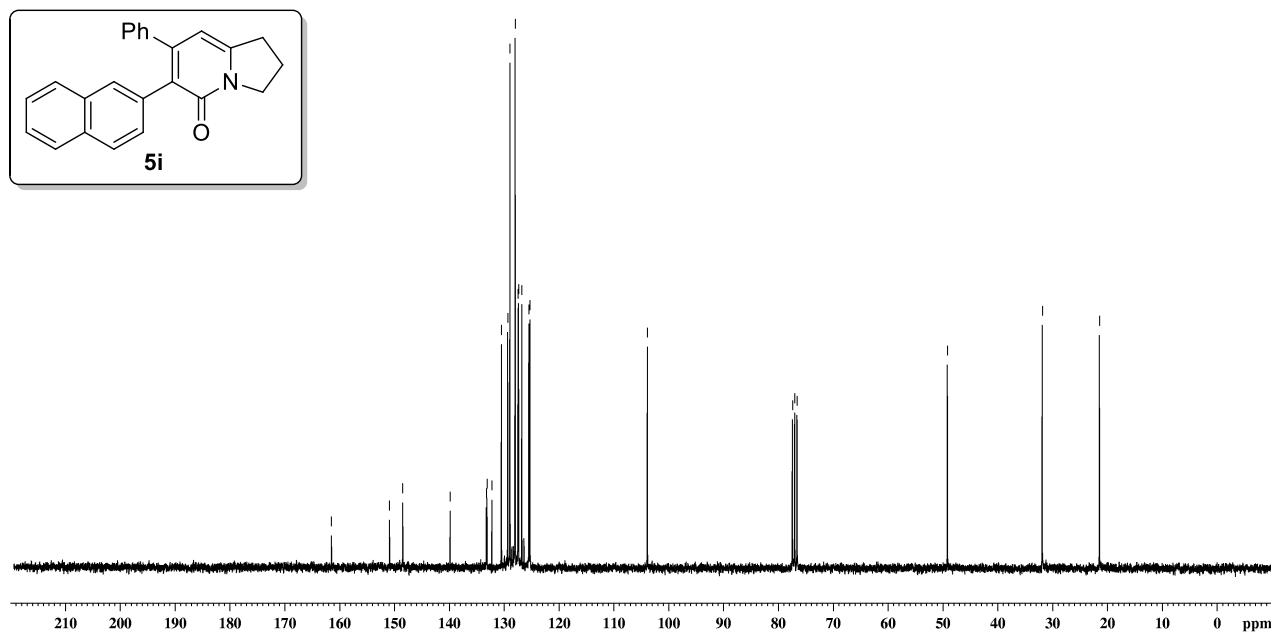



<sup>1</sup>H NMR (300 MHz, CDCl<sub>3</sub>); **5j**

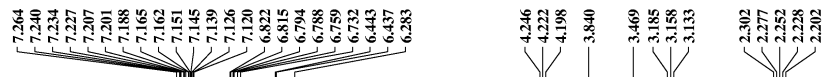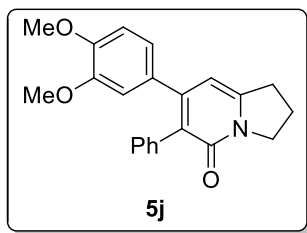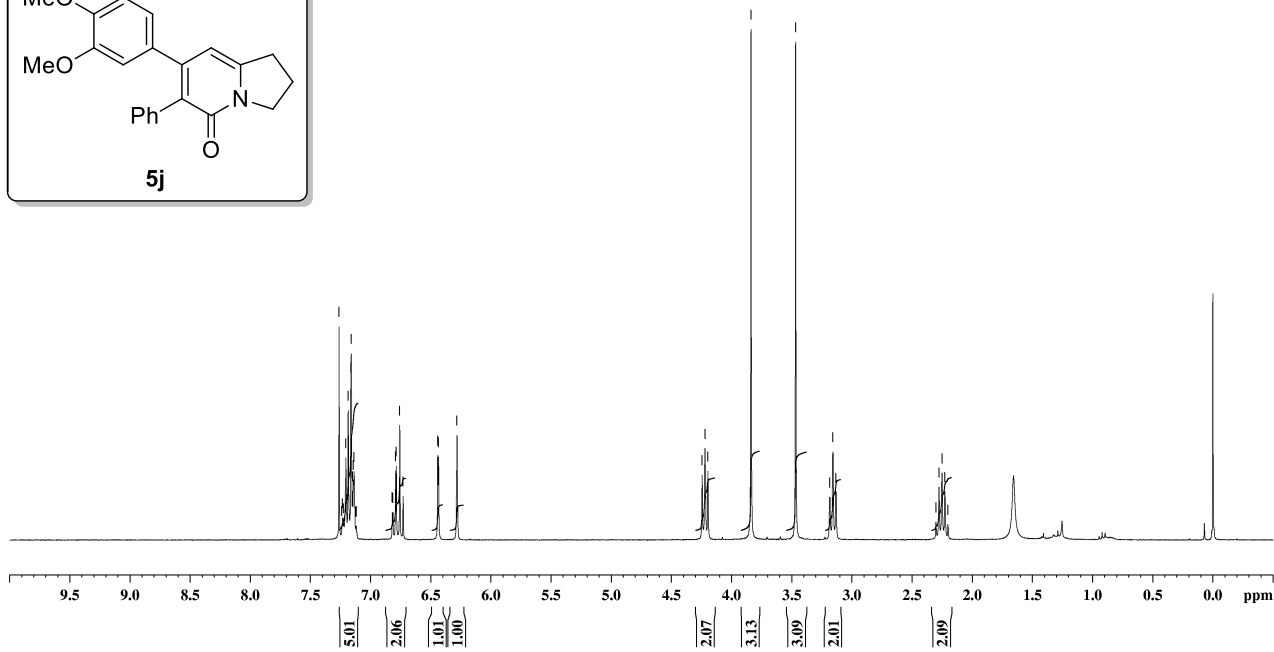

<sup>13</sup>C NMR (75 MHz, CDCl<sub>3</sub>); **5j**

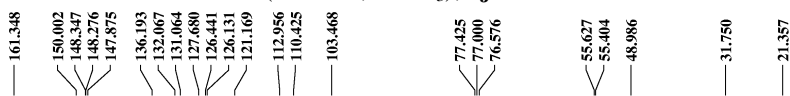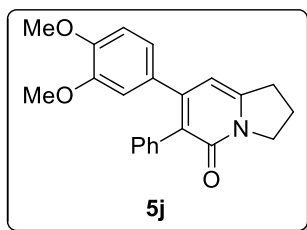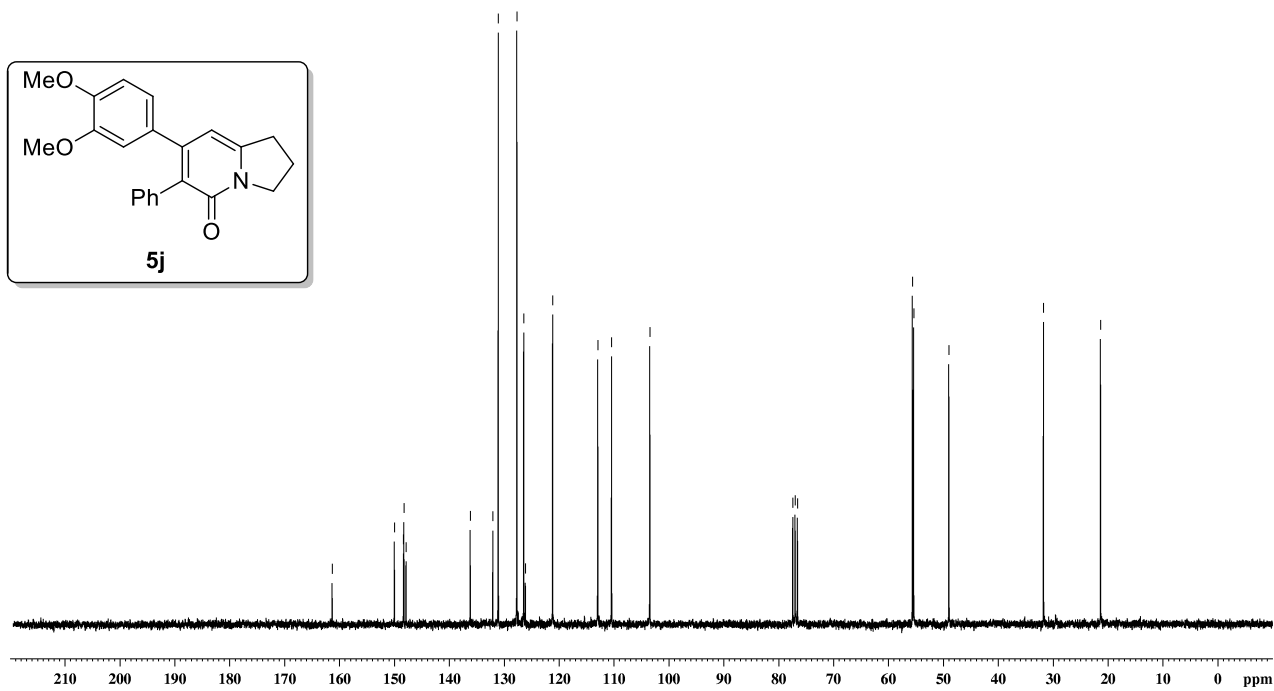

<sup>1</sup>H NMR (300 MHz, CDCl<sub>3</sub>); **5k**

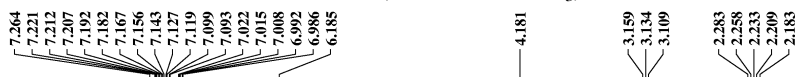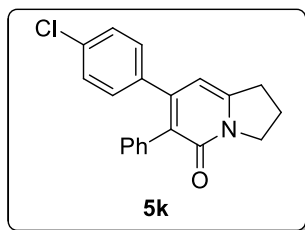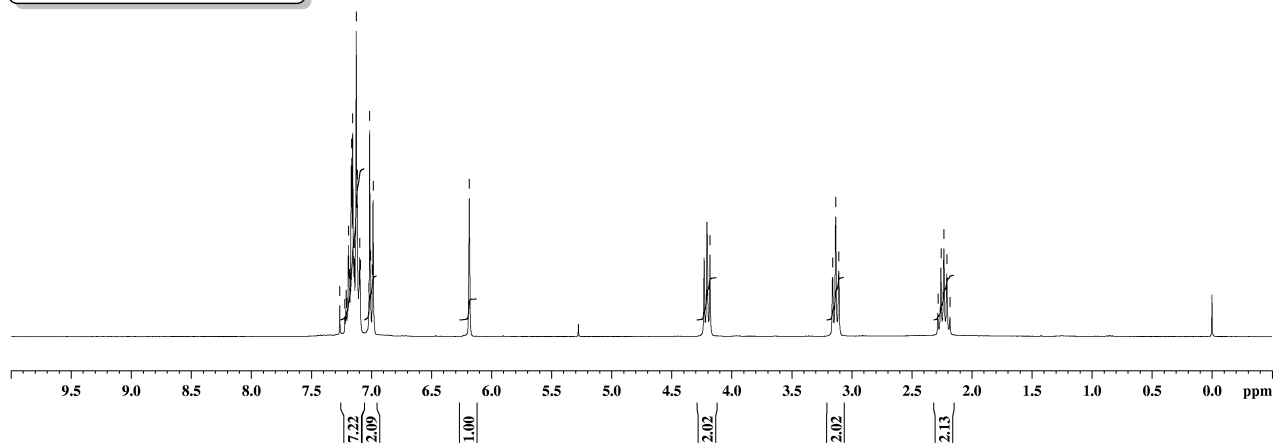

<sup>13</sup>C NMR (75 MHz, CDCl<sub>3</sub>); **5k**

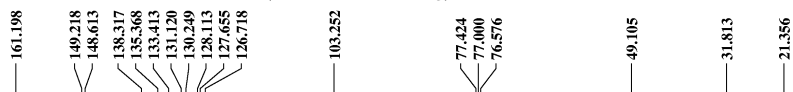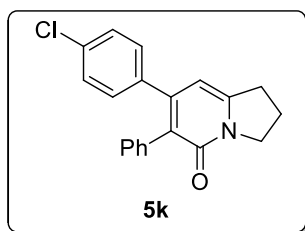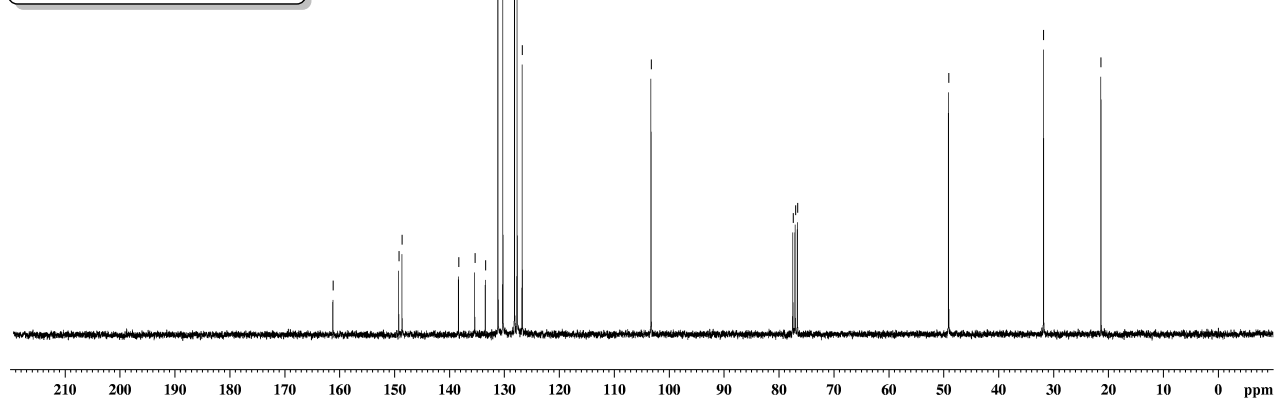

<sup>1</sup>H NMR (300 MHz, CDCl<sub>3</sub>); **5I**

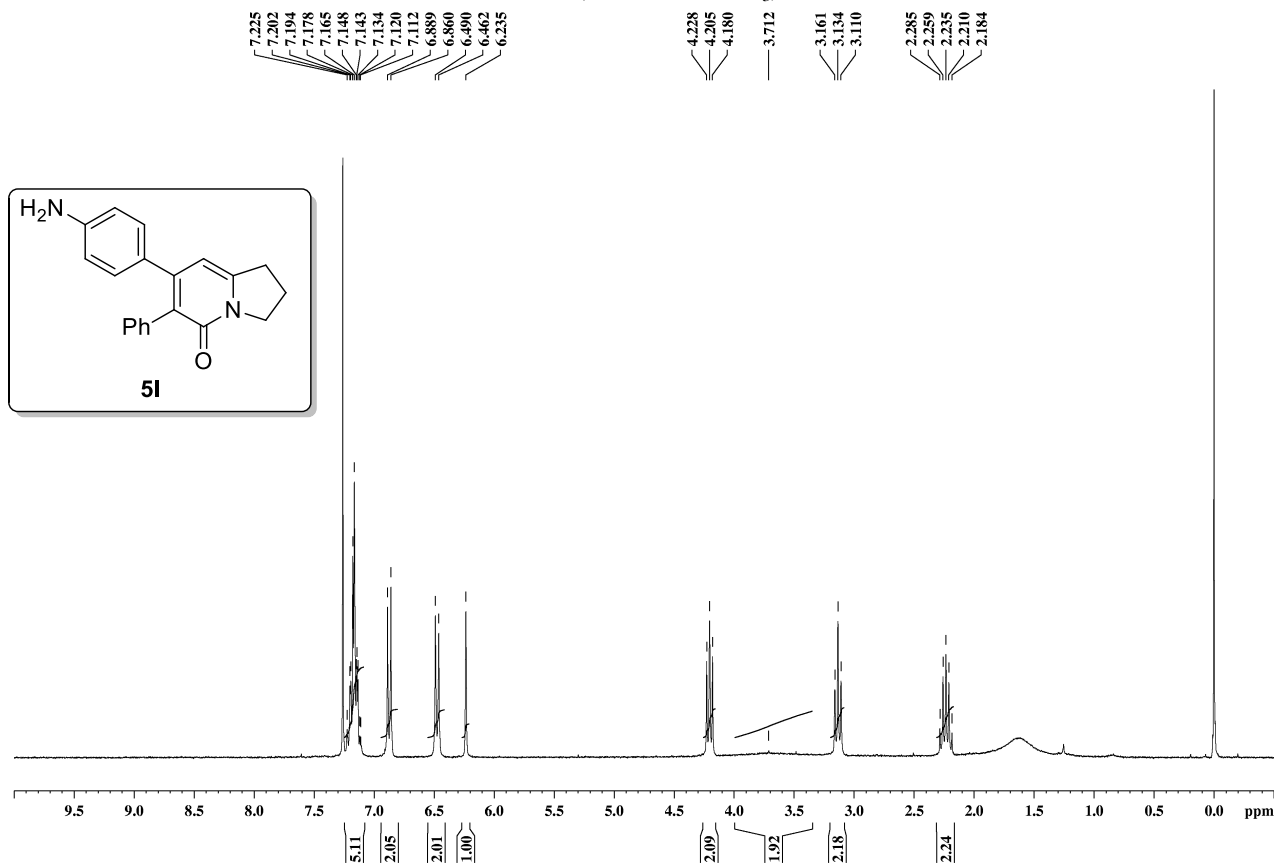

<sup>13</sup>C NMR (75 MHz, CDCl<sub>3</sub>); **5I**

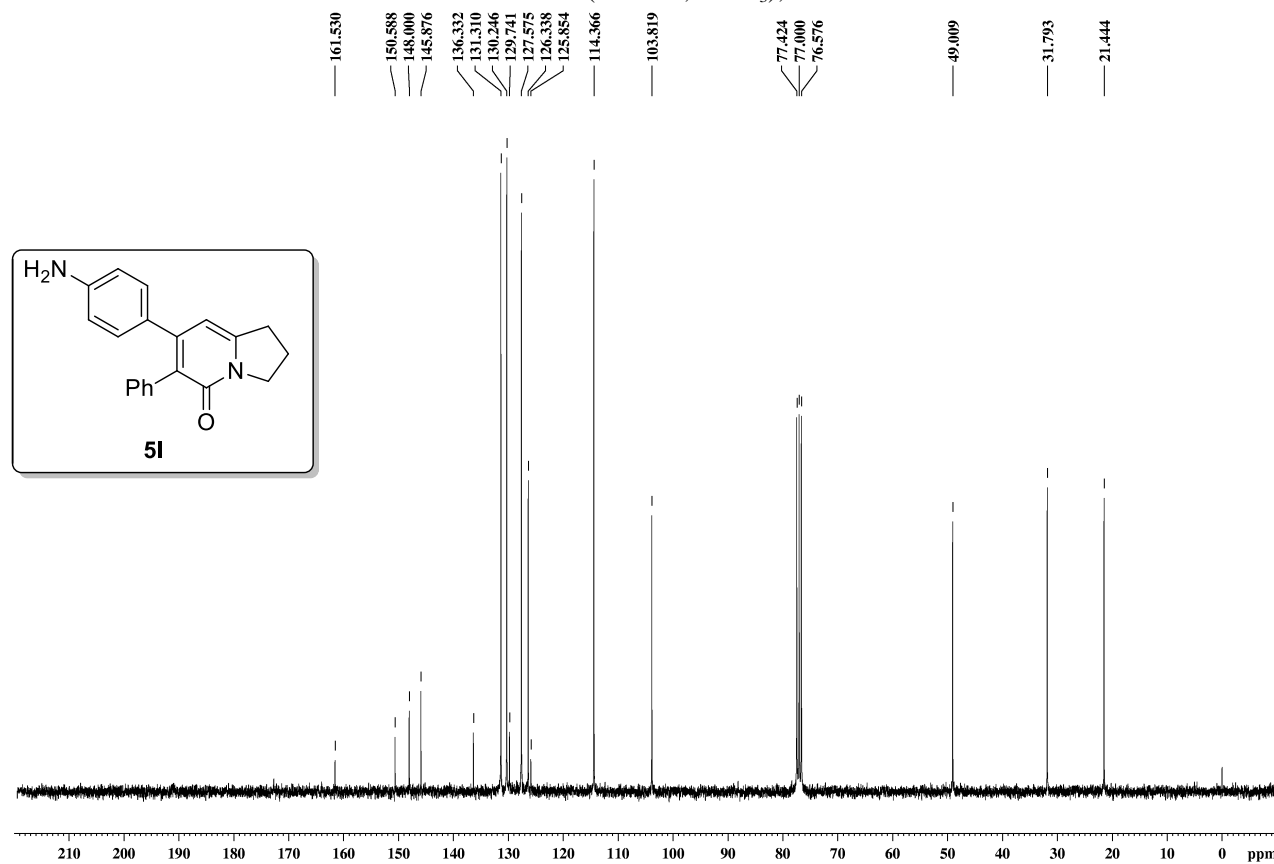

$^1\text{H}$  NMR (300 MHz,  $\text{CDCl}_3$ ); **5m**

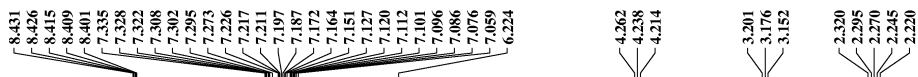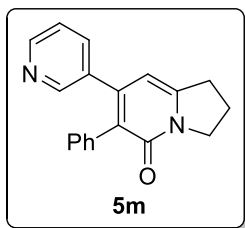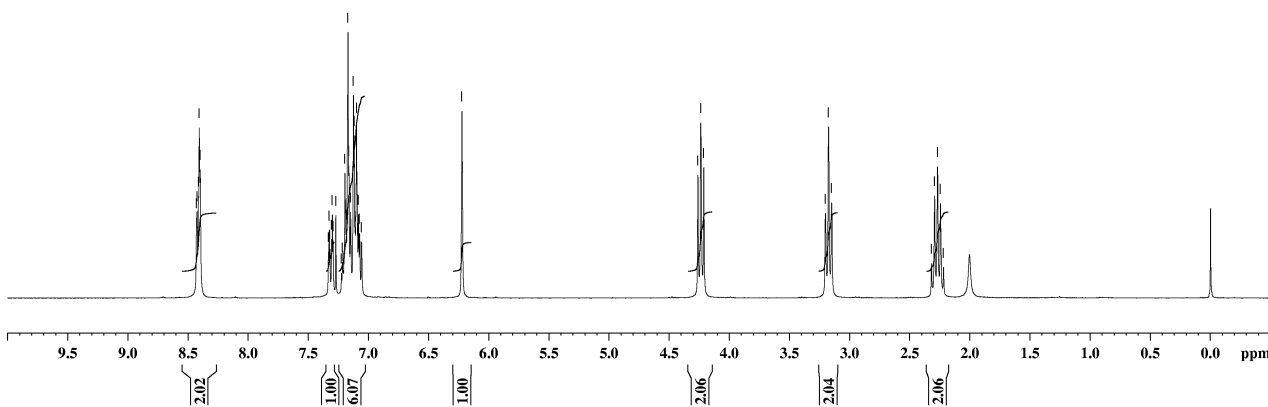

$^{13}\text{C}$  NMR (75 MHz,  $\text{CDCl}_3$ ); **5m**

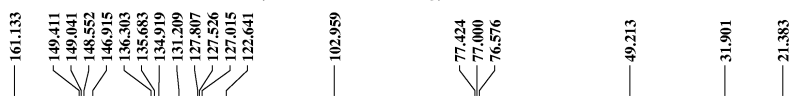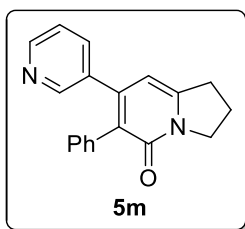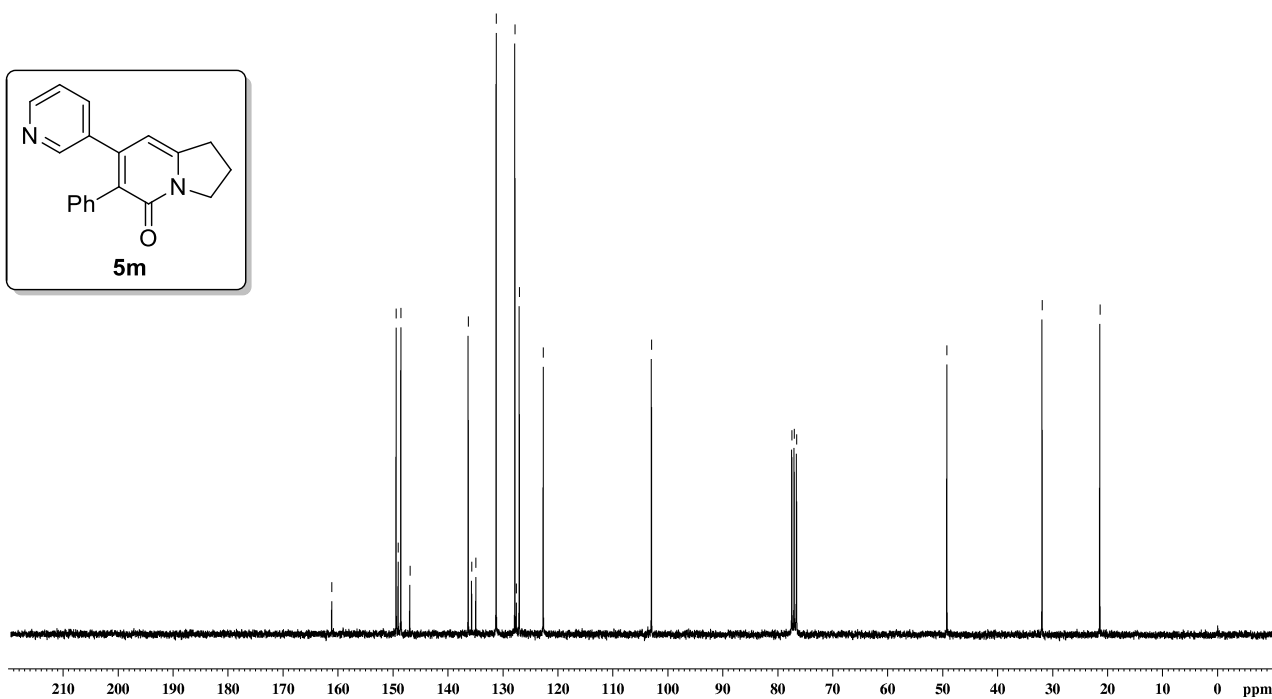

<sup>1</sup>H NMR (300 MHz, CDCl<sub>3</sub>); **5n**

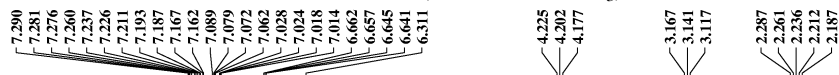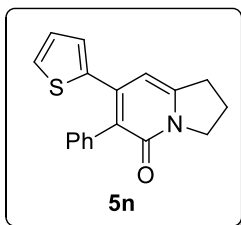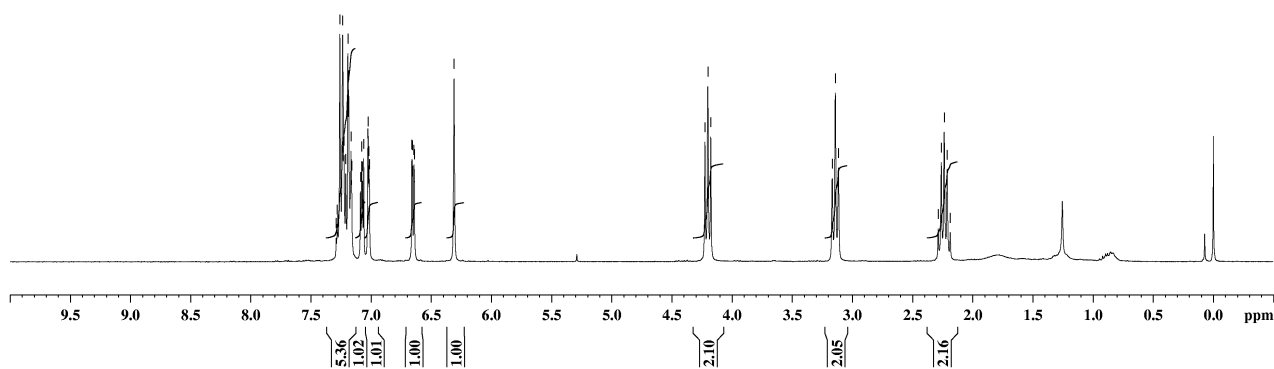

<sup>13</sup>C NMR (75 MHz, CDCl<sub>3</sub>); **5n**

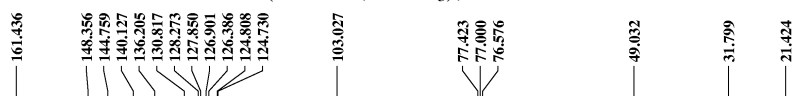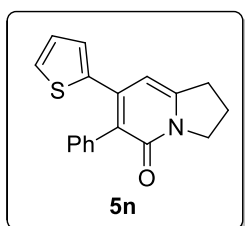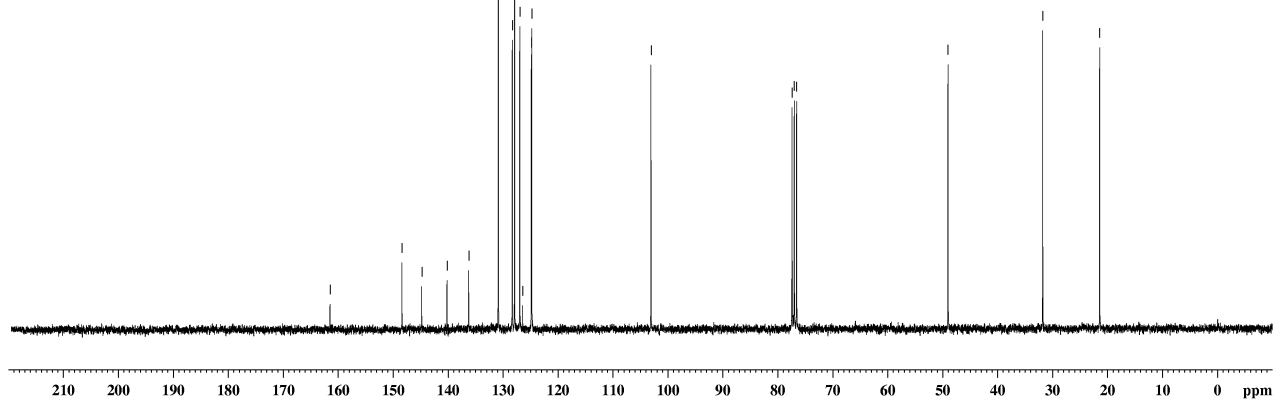

<sup>1</sup>H NMR (300 MHz, CDCl<sub>3</sub>); **5o**

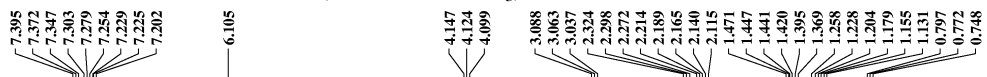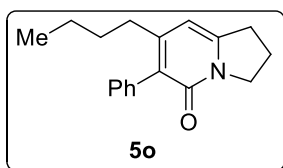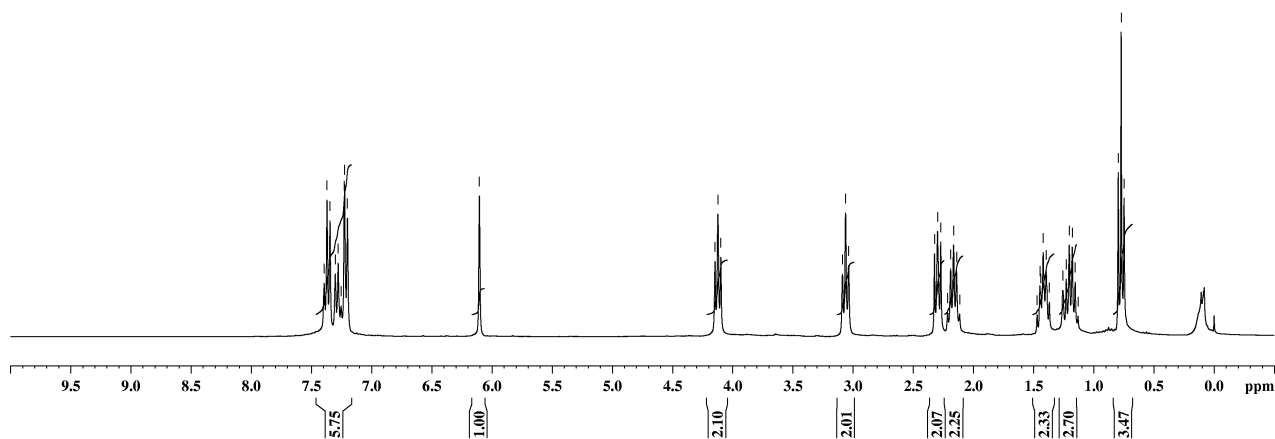

<sup>13</sup>C NMR (75 MHz, CDCl<sub>3</sub>); **5o**

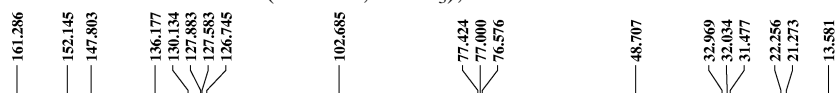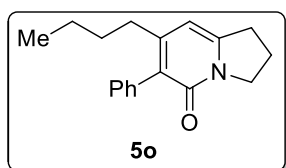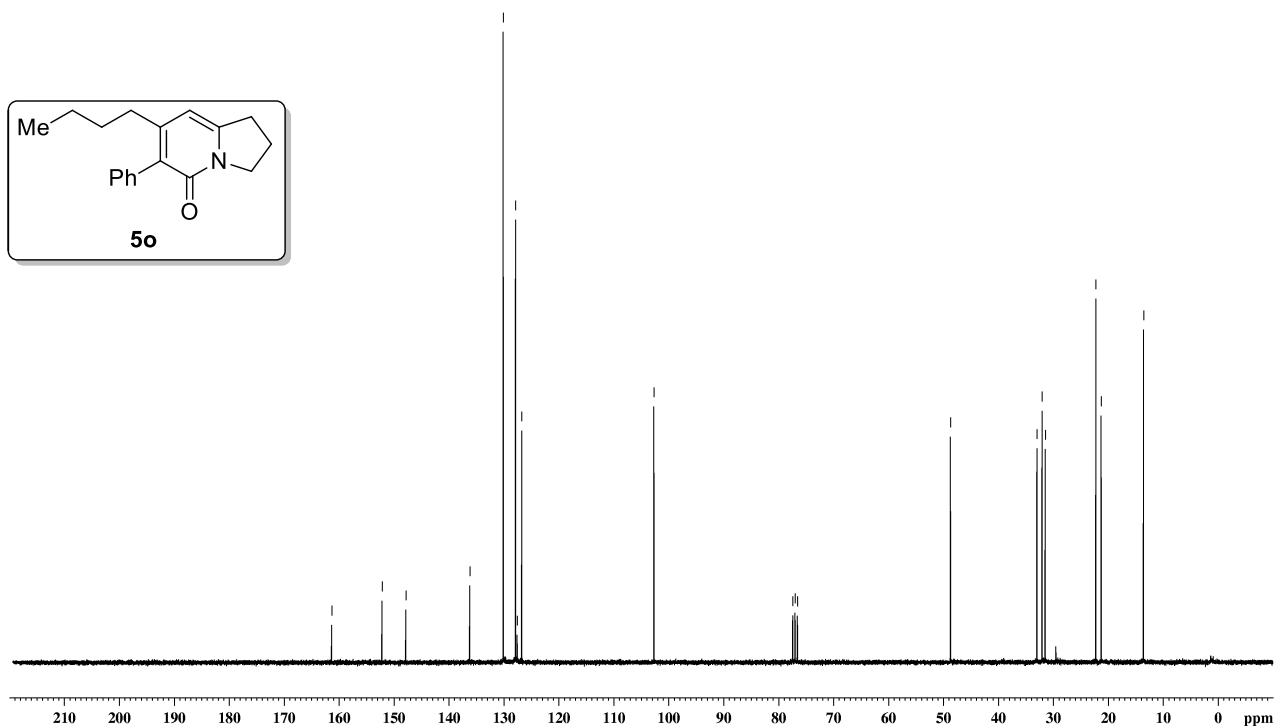

<sup>1</sup>H NMR (300 MHz, CDCl<sub>3</sub>); **5r**

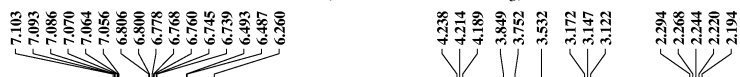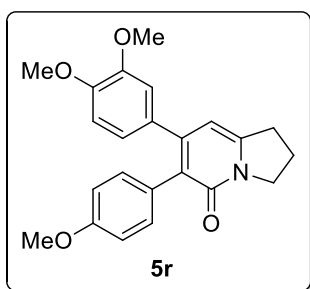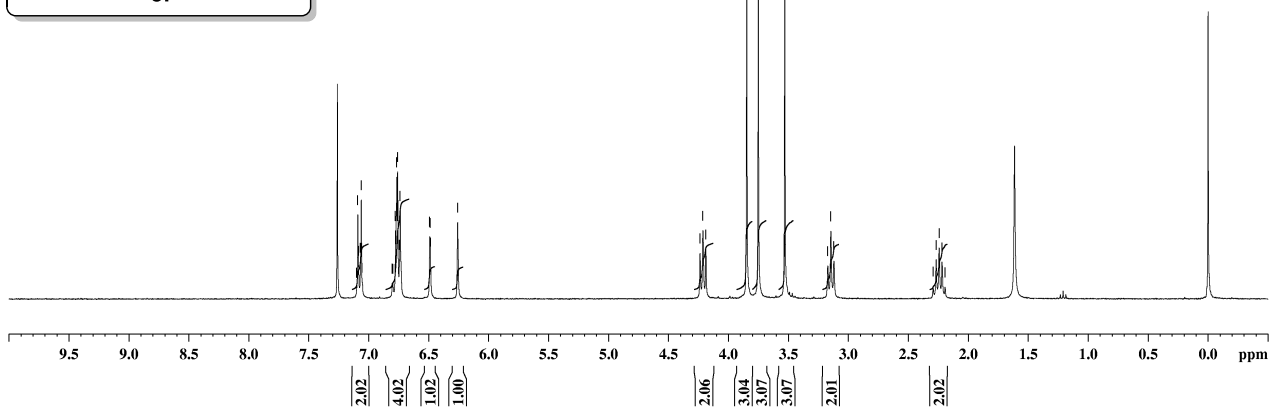

<sup>13</sup>C NMR (75 MHz, CDCl<sub>3</sub>); **5r**

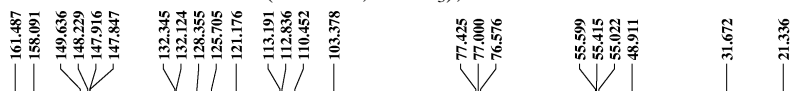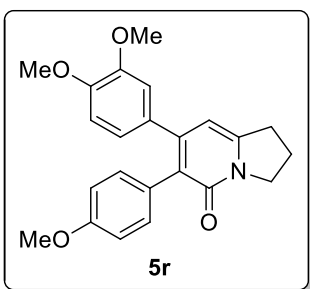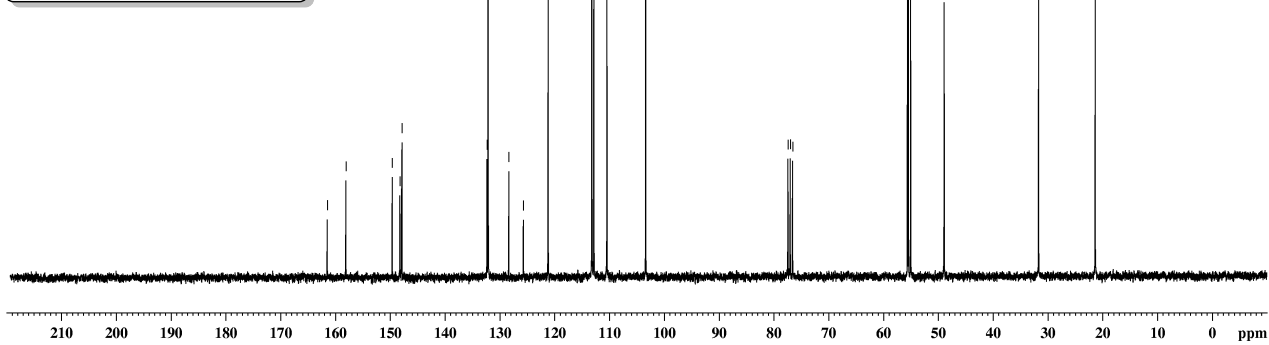

<sup>1</sup>H NMR (300 MHz, CDCl<sub>3</sub>); **5s**

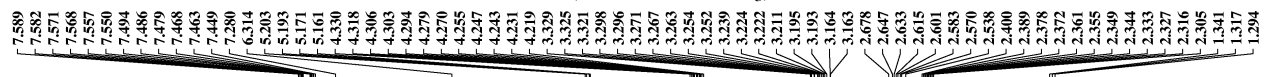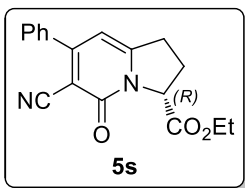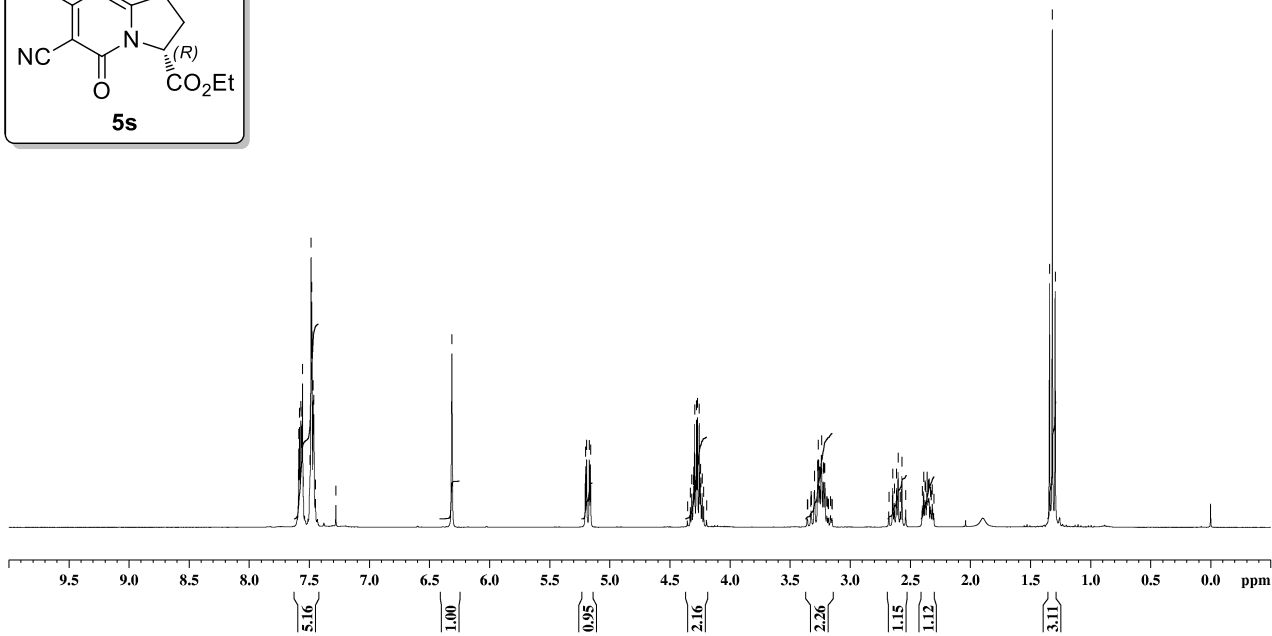

<sup>13</sup>C NMR (75 MHz, CDCl<sub>3</sub>); **5s**

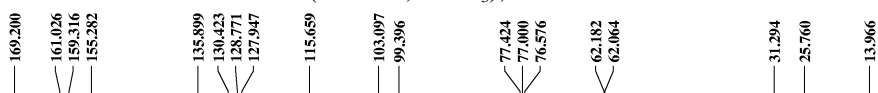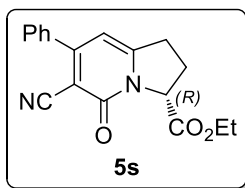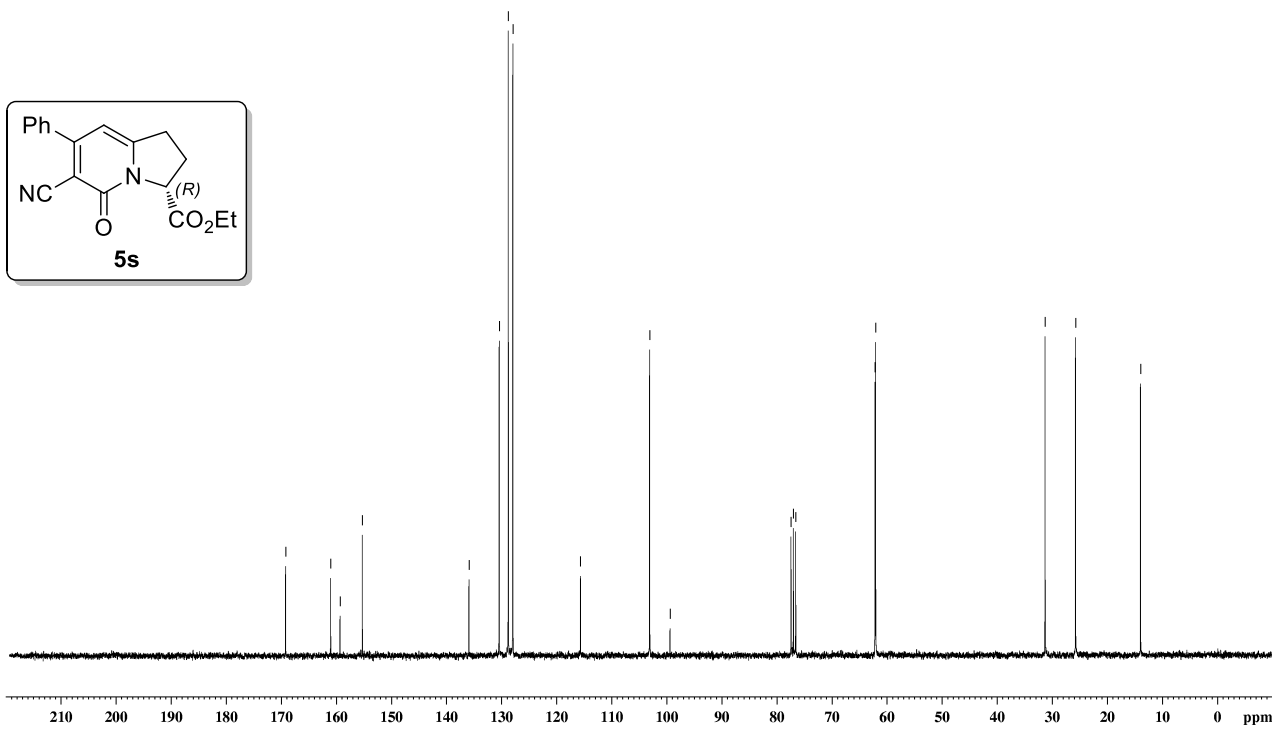



<sup>1</sup>H NMR (300 MHz, CDCl<sub>3</sub>); **7b**

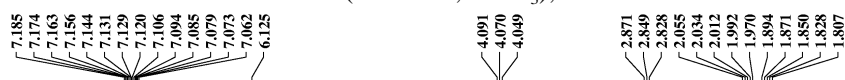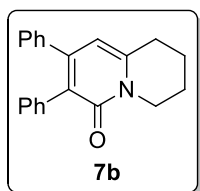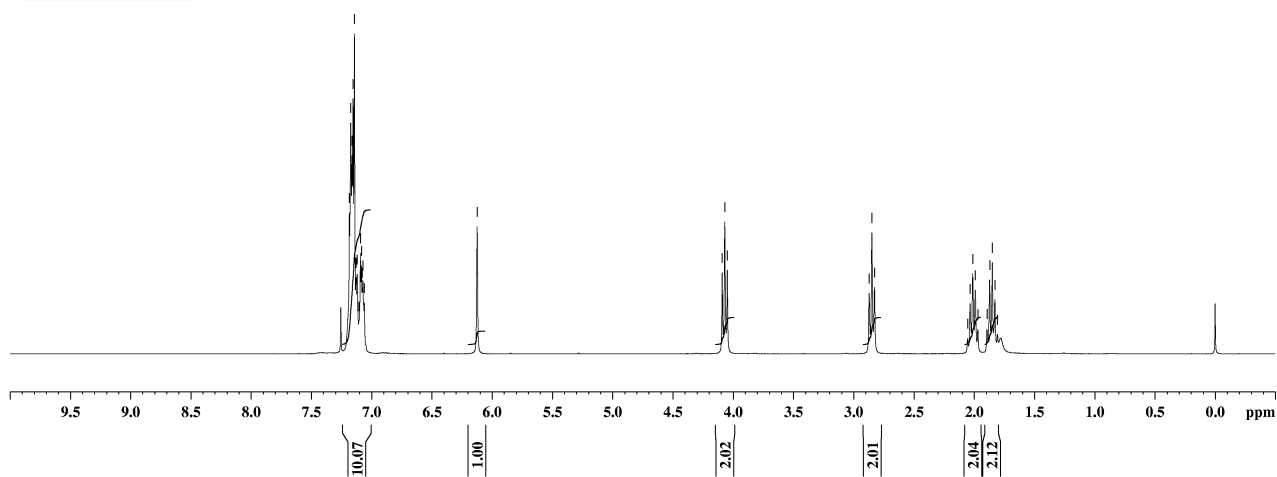

<sup>13</sup>C NMR (75 MHz, CDCl<sub>3</sub>); **7b**

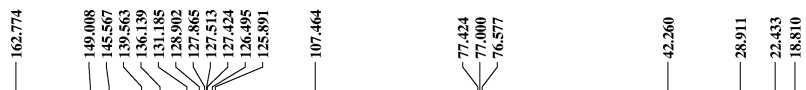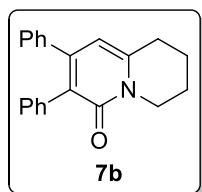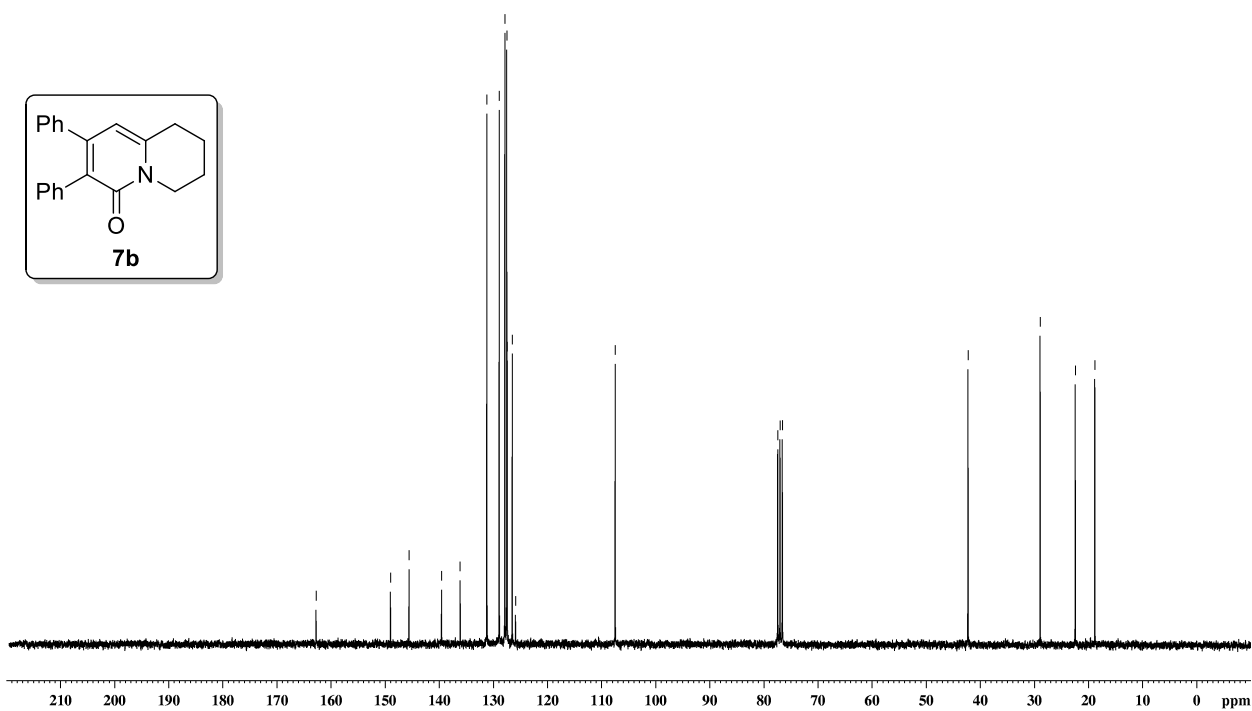

<sup>1</sup>H NMR (300 MHz, CDCl<sub>3</sub>); **7d**

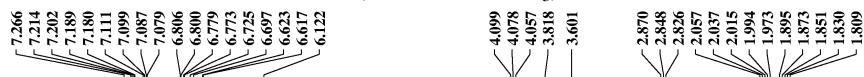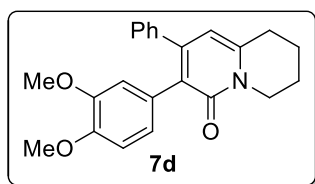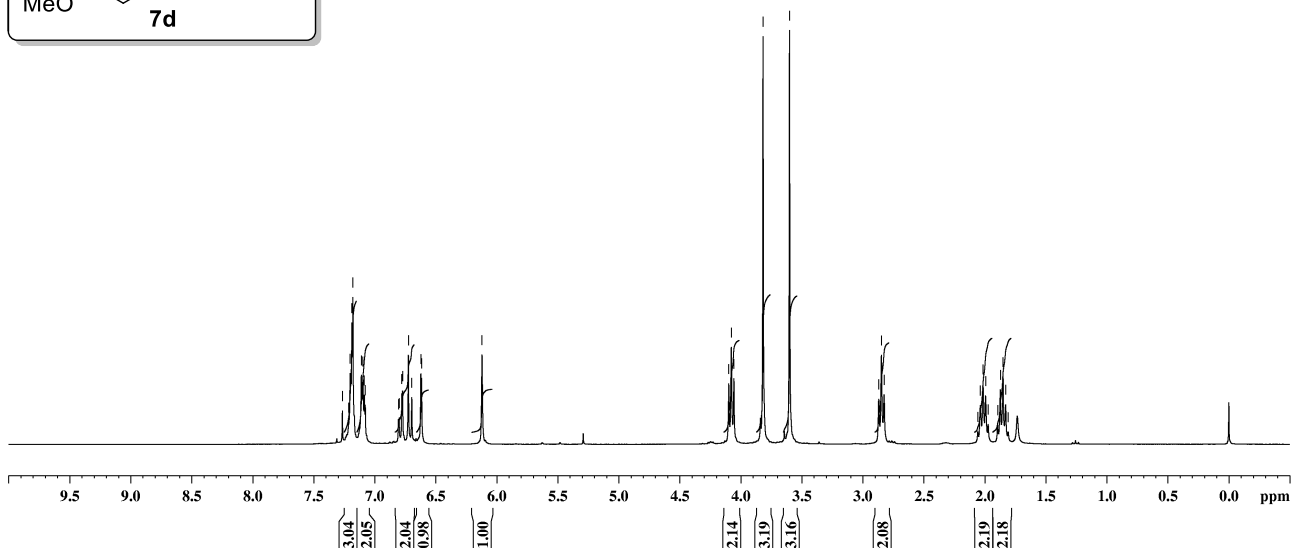

<sup>13</sup>C NMR (75 MHz, CDCl<sub>3</sub>); **7d**

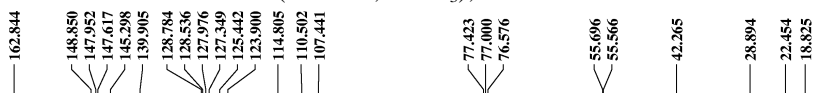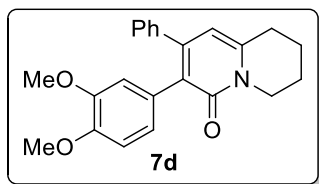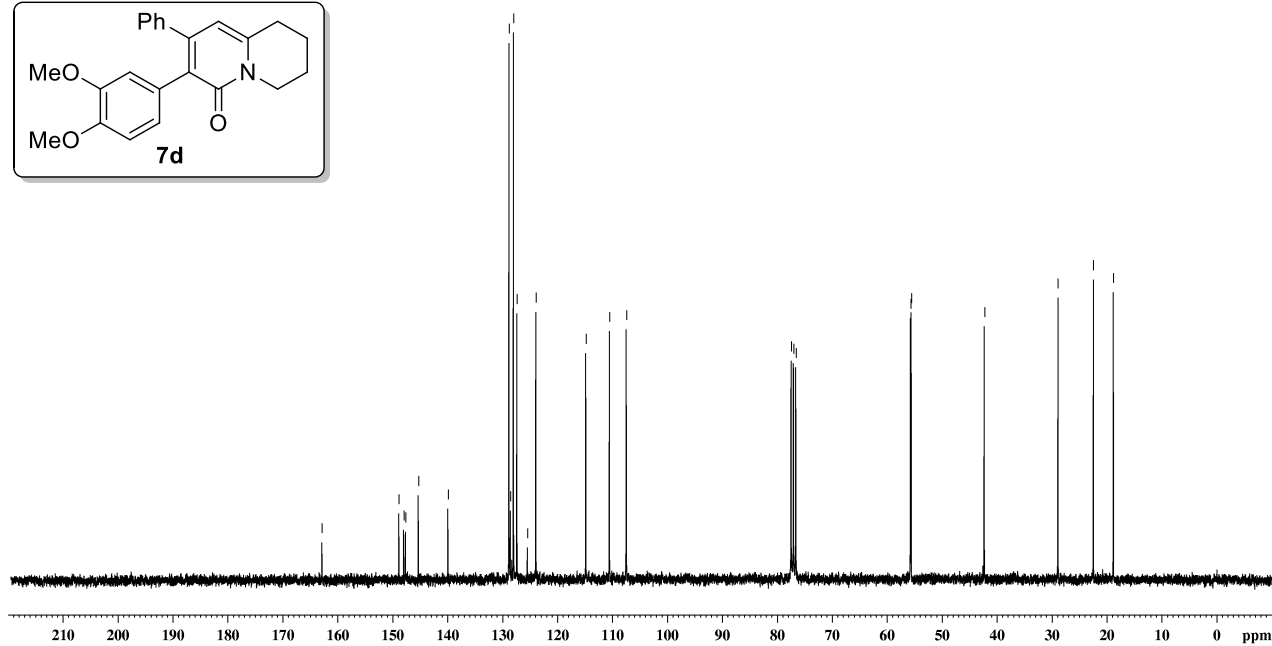

<sup>1</sup>H NMR (300 MHz, CDCl<sub>3</sub>); **7e**

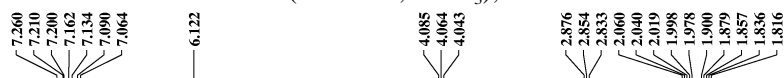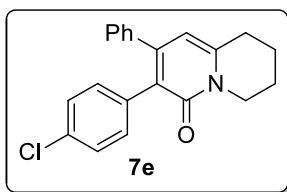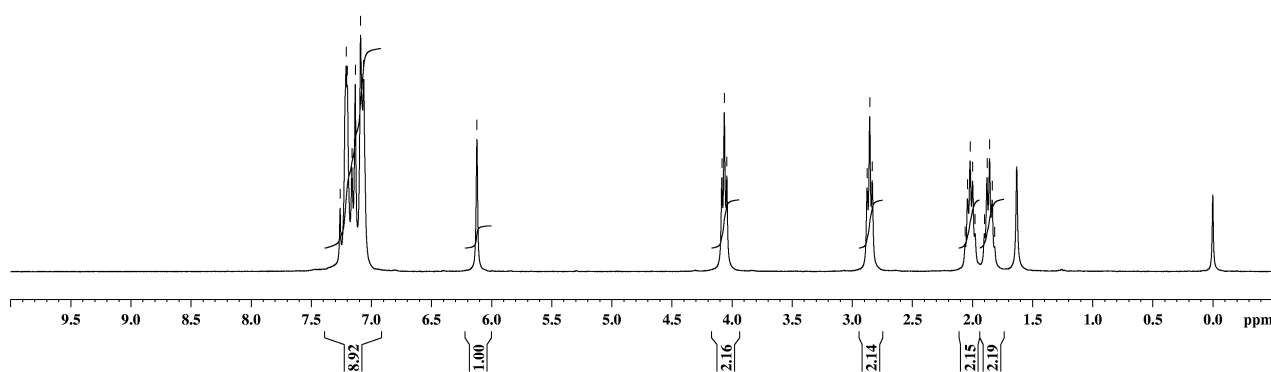

<sup>13</sup>C NMR (75 MHz, CDCl<sub>3</sub>); **7e**

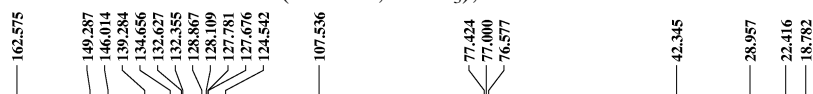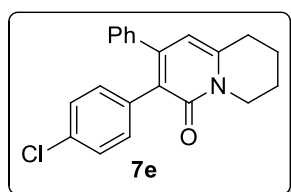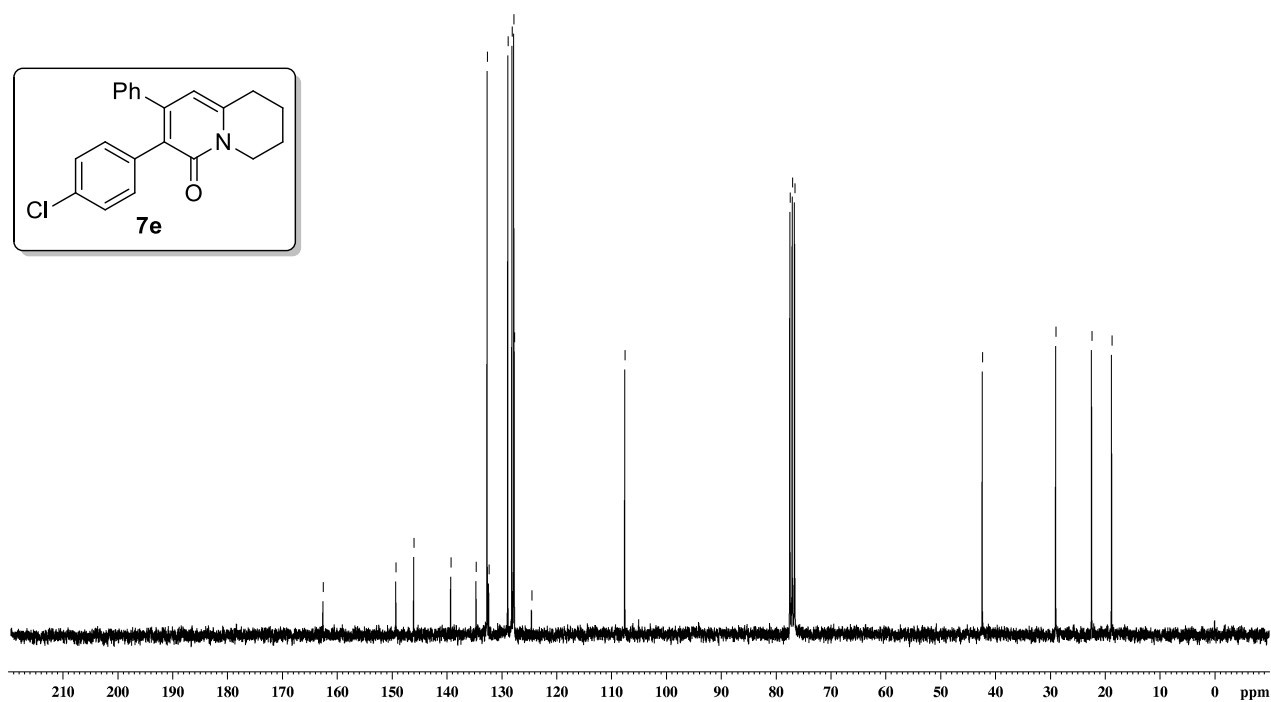

<sup>1</sup>H NMR (300 MHz, CDCl<sub>3</sub>); **7f**

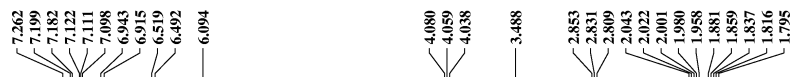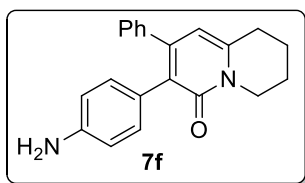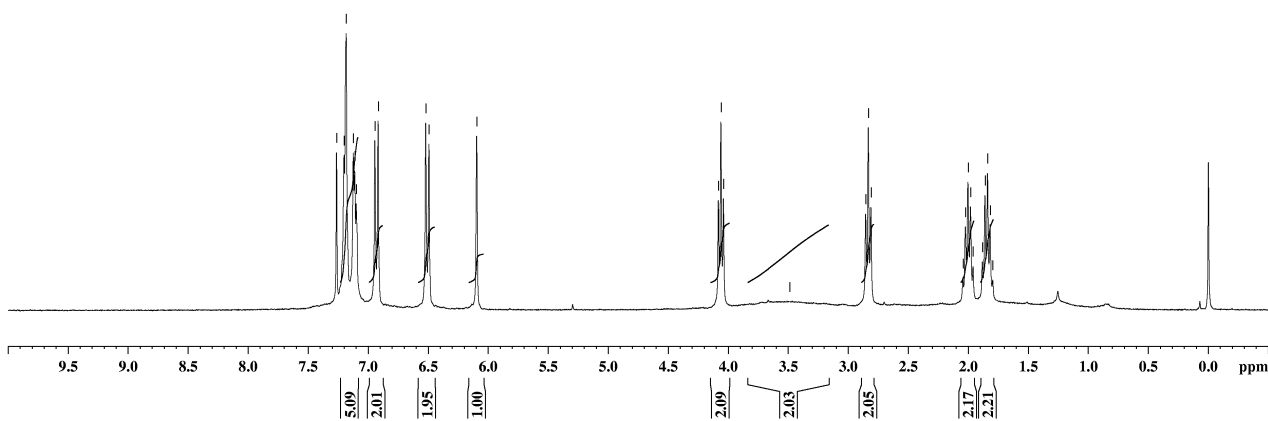

<sup>13</sup>C NMR (75 MHz, CDCl<sub>3</sub>); **7f**

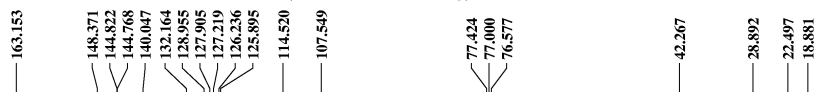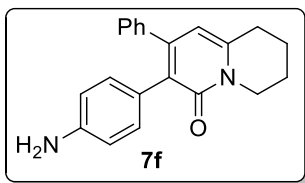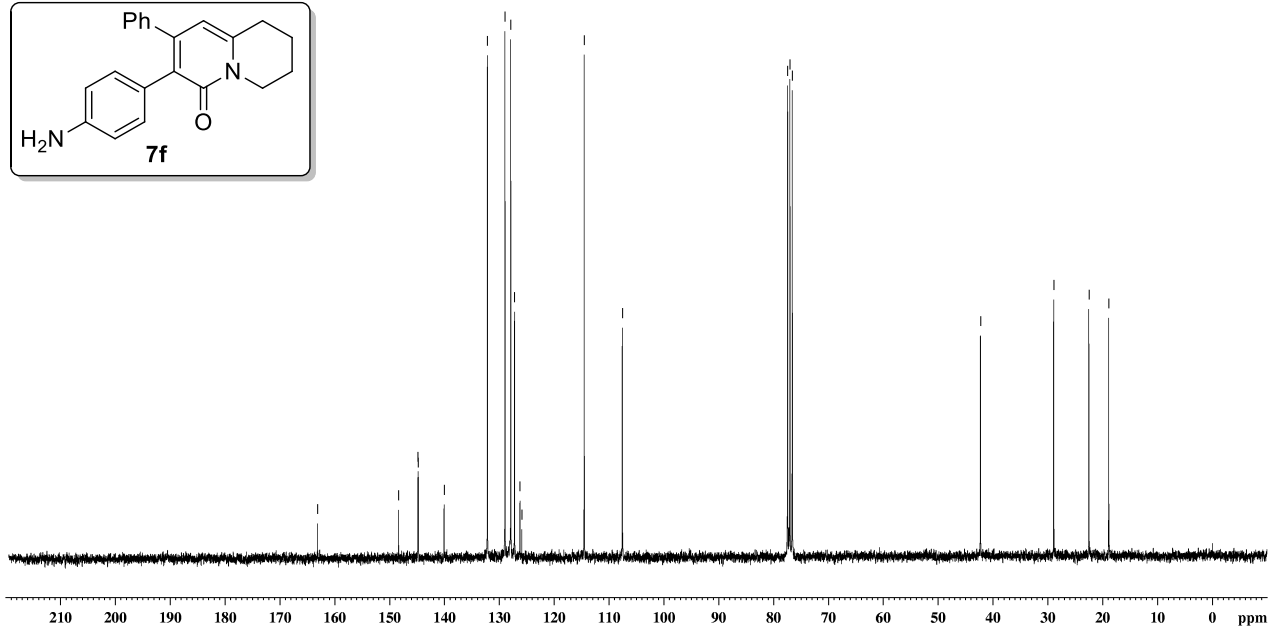

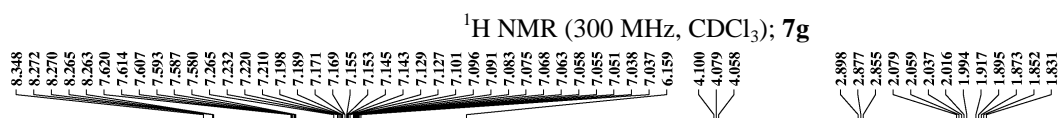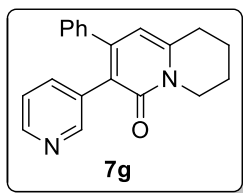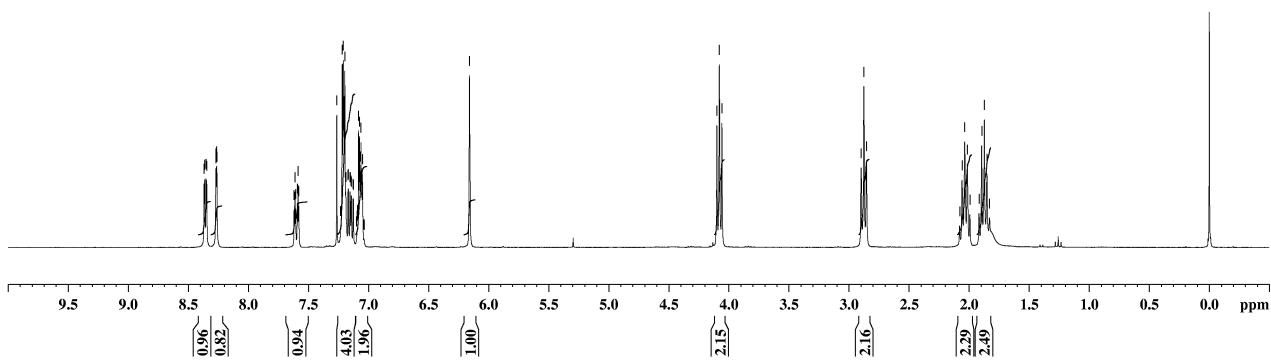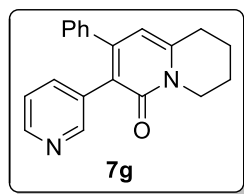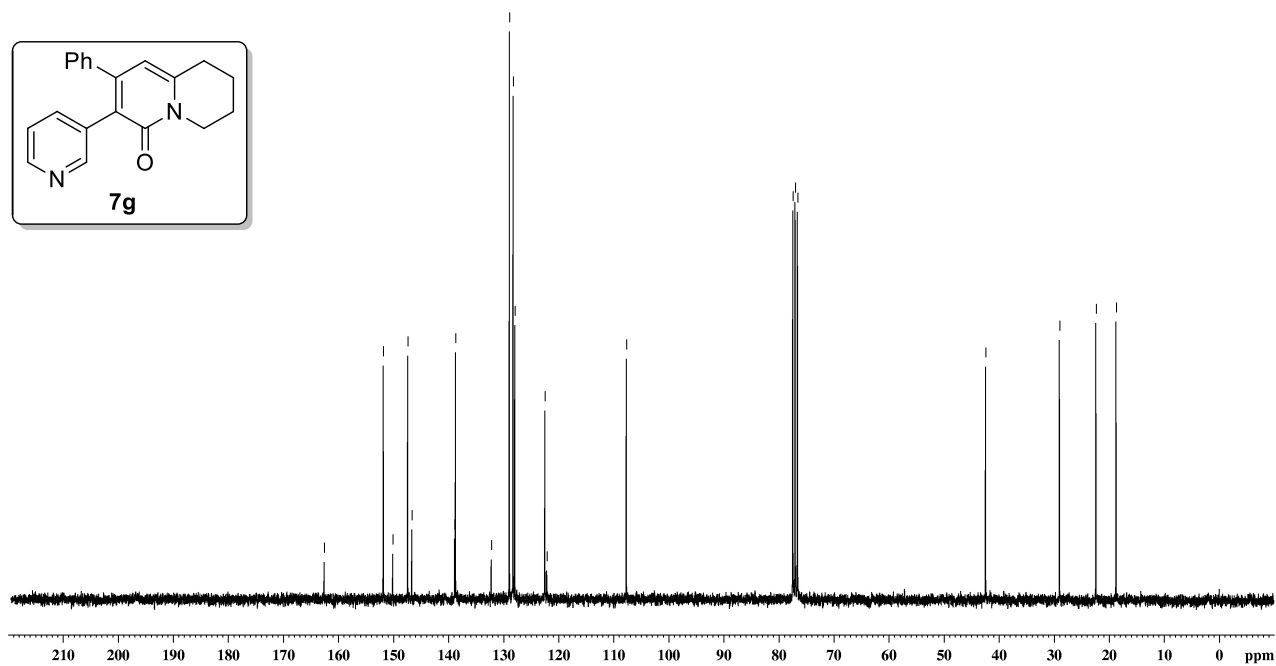

<sup>1</sup>H NMR (300 MHz, CDCl<sub>3</sub>); **7h**

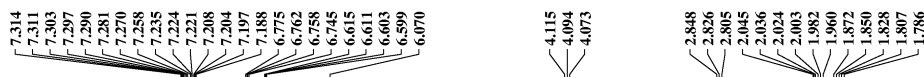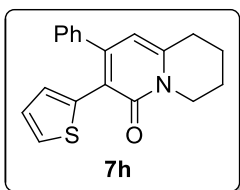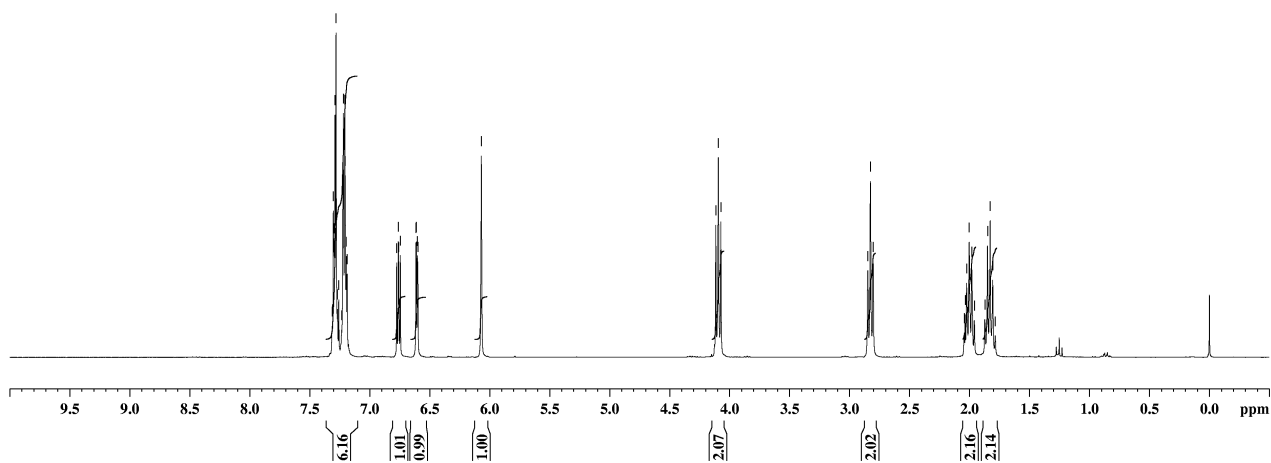

<sup>13</sup>C NMR (75 MHz, CDCl<sub>3</sub>); **7h**

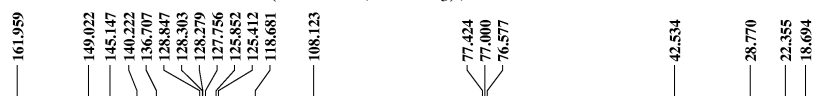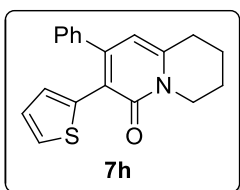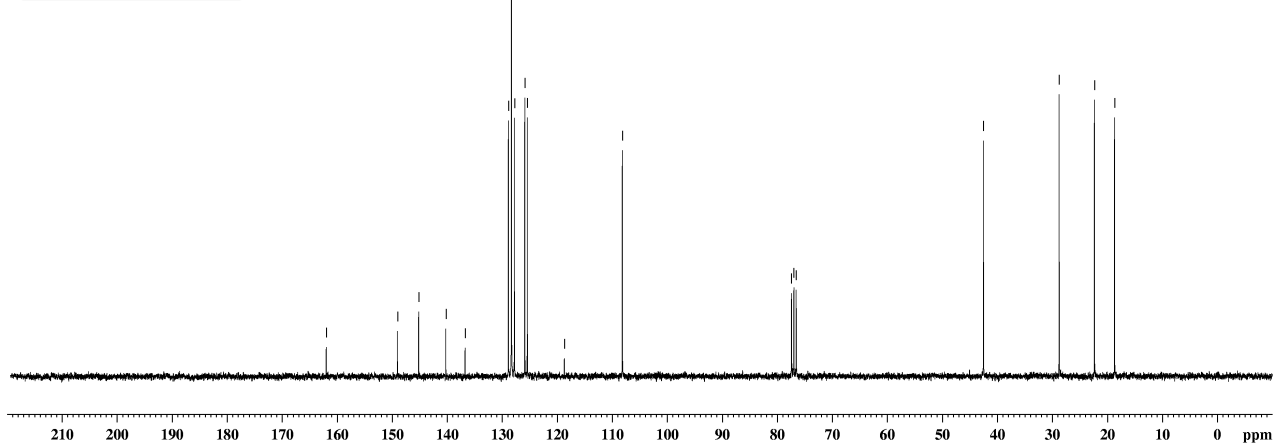

<sup>1</sup>H NMR (300 MHz, CDCl<sub>3</sub>); **7i**

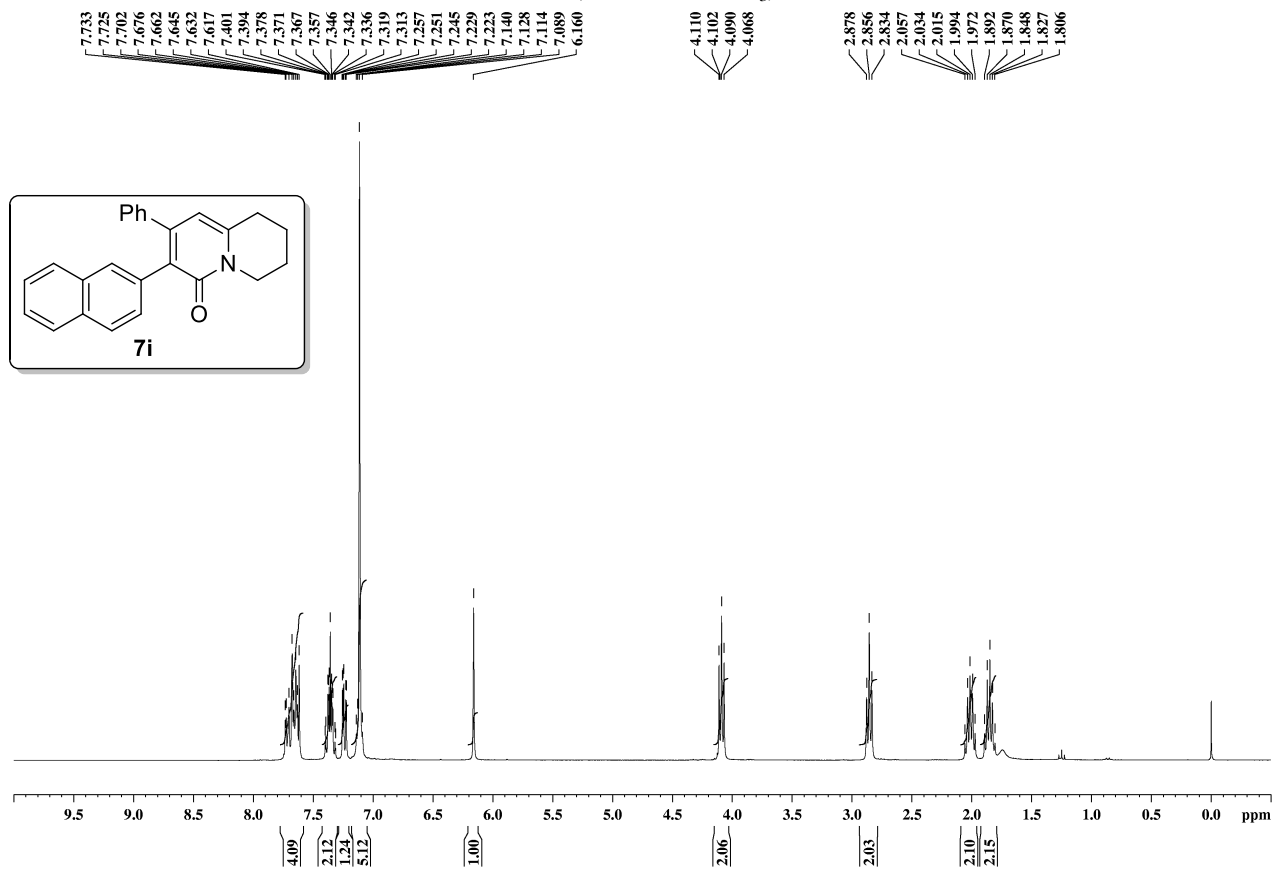

<sup>13</sup>C NMR (75 MHz, CDCl<sub>3</sub>); **7i**

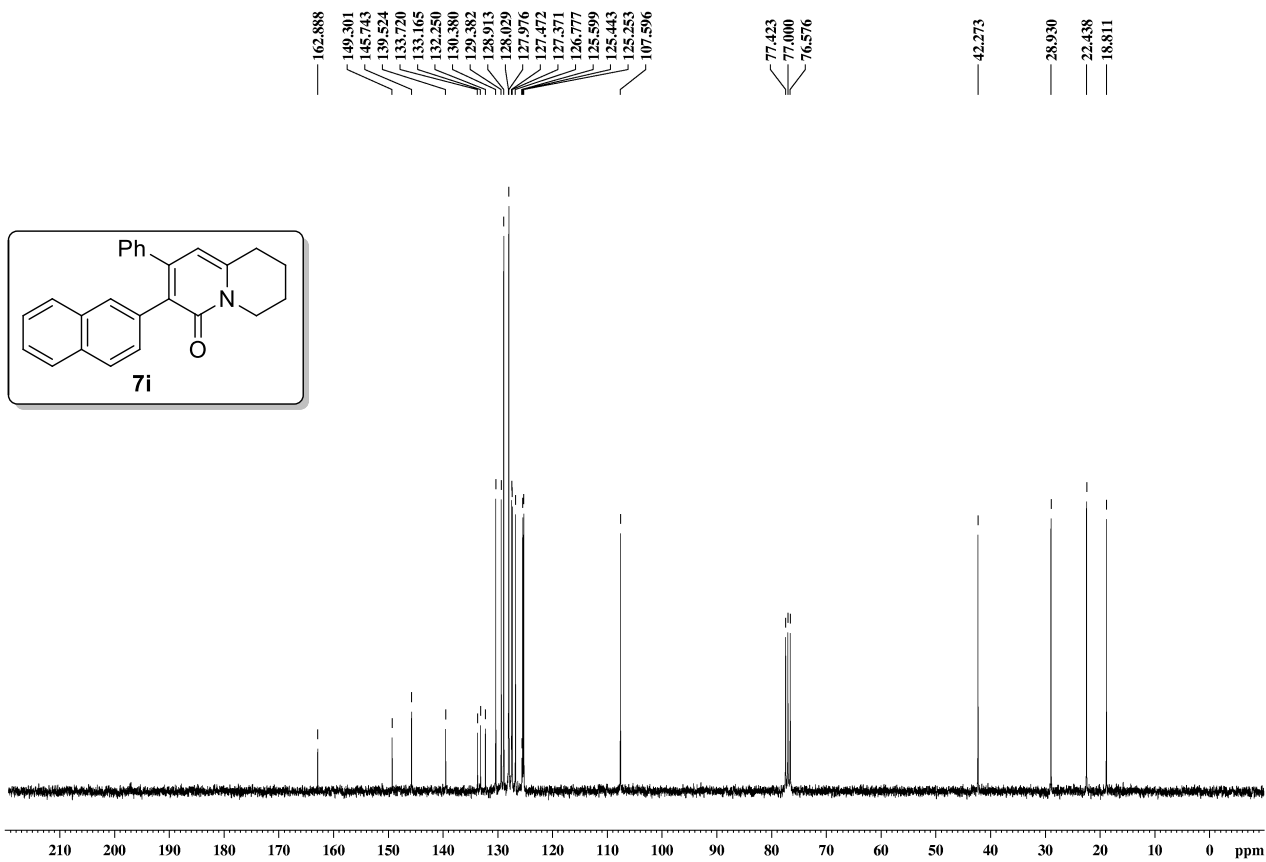

<sup>1</sup>H NMR (300 MHz, CDCl<sub>3</sub>); **7j**

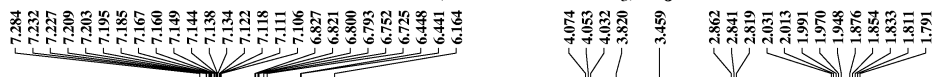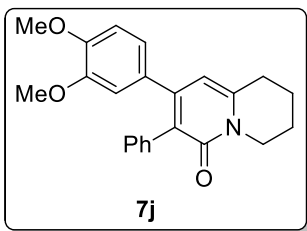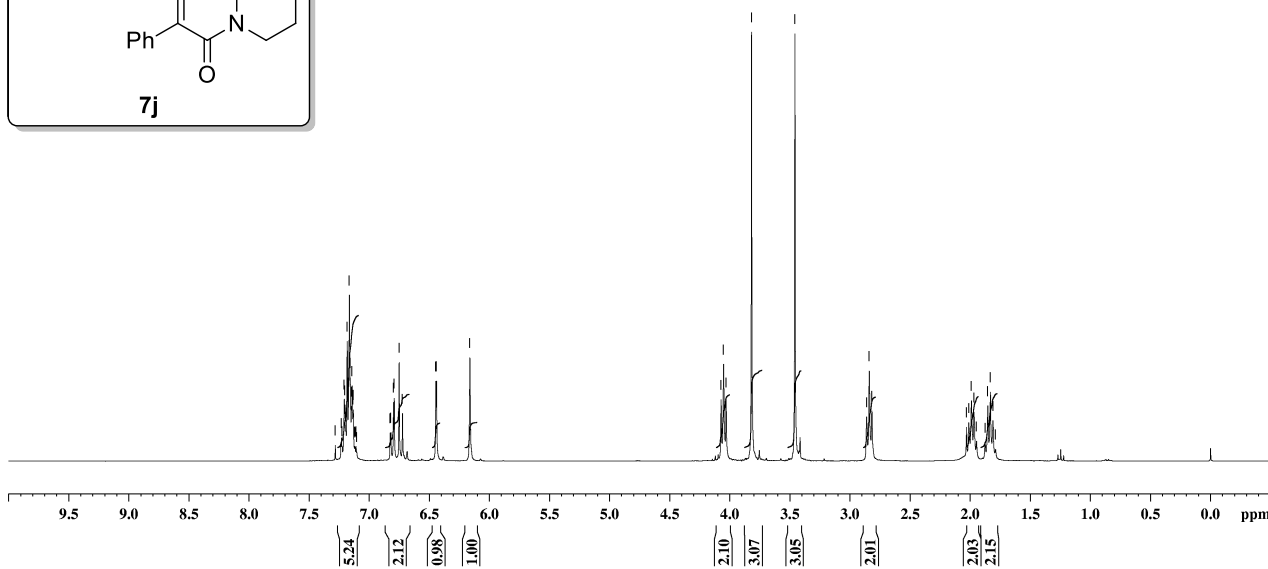

<sup>13</sup>C NMR (75 MHz, CDCl<sub>3</sub>); **7j**

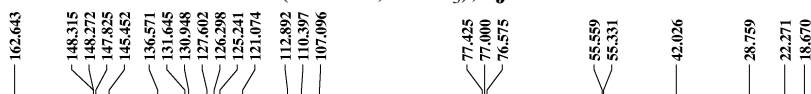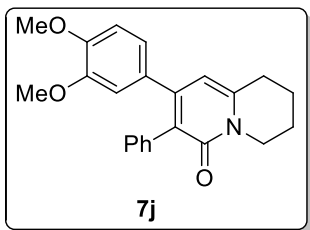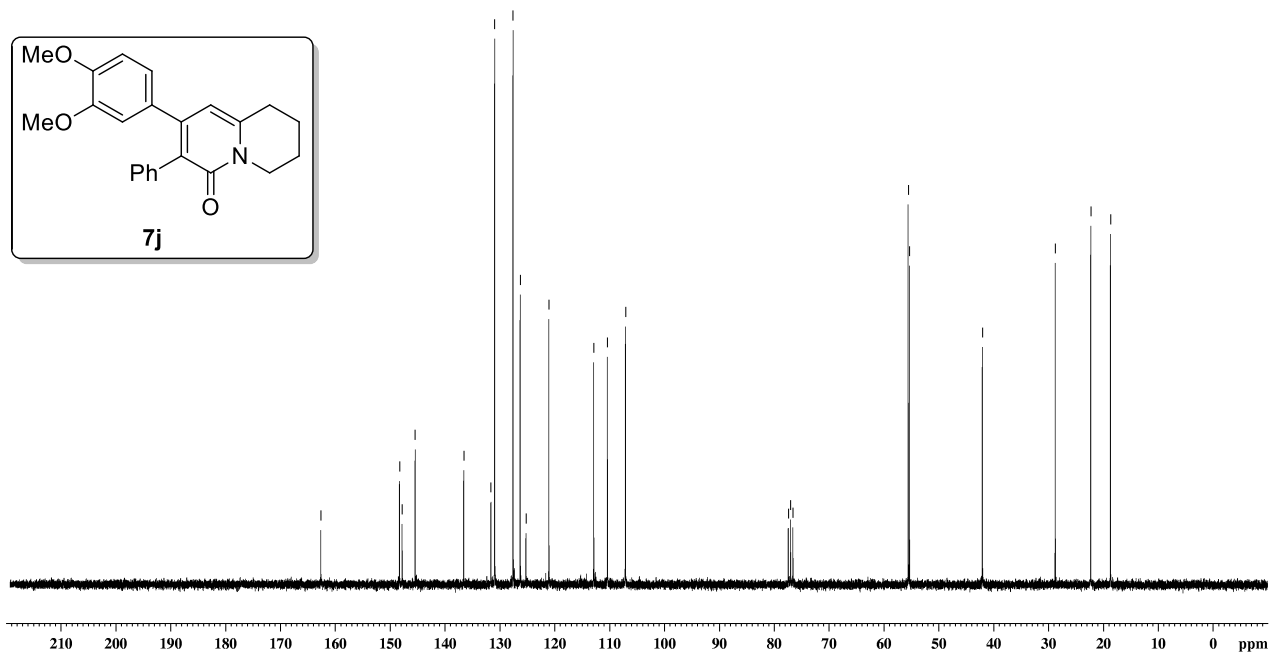



<sup>1</sup>H NMR (300 MHz, CDCl<sub>3</sub>); **7k**

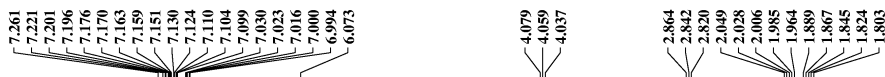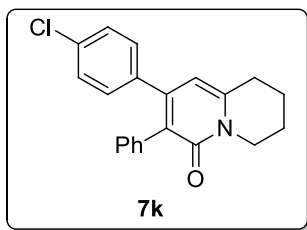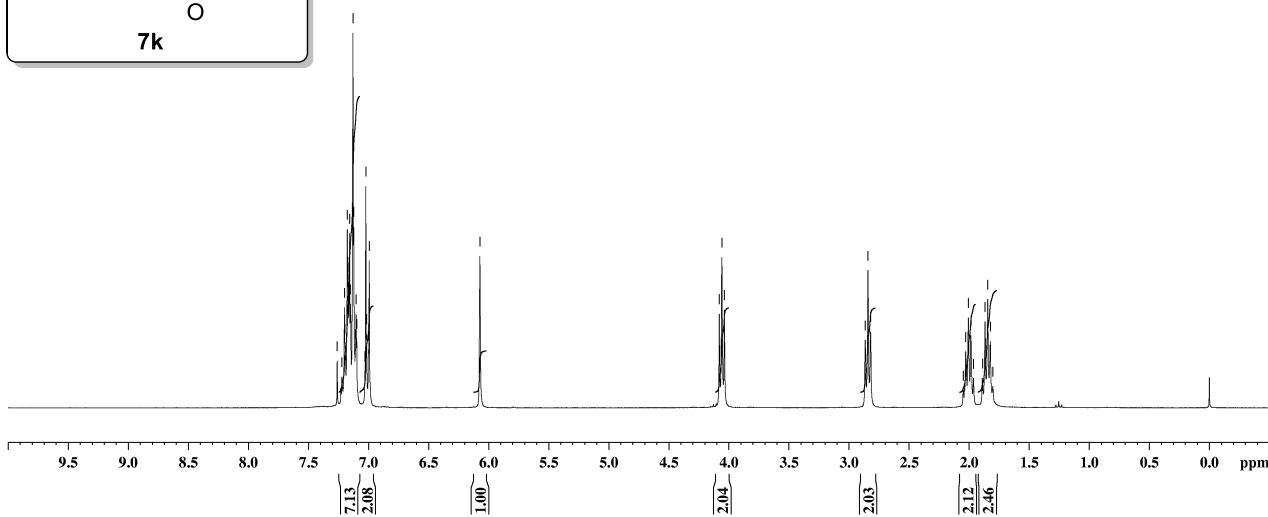

<sup>13</sup>C NMR (75 MHz, CDCl<sub>3</sub>); **7k**

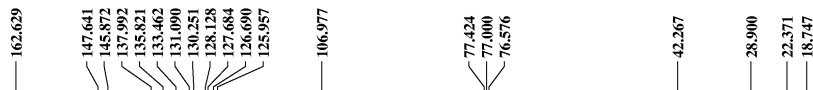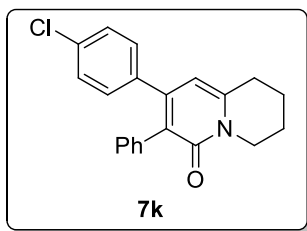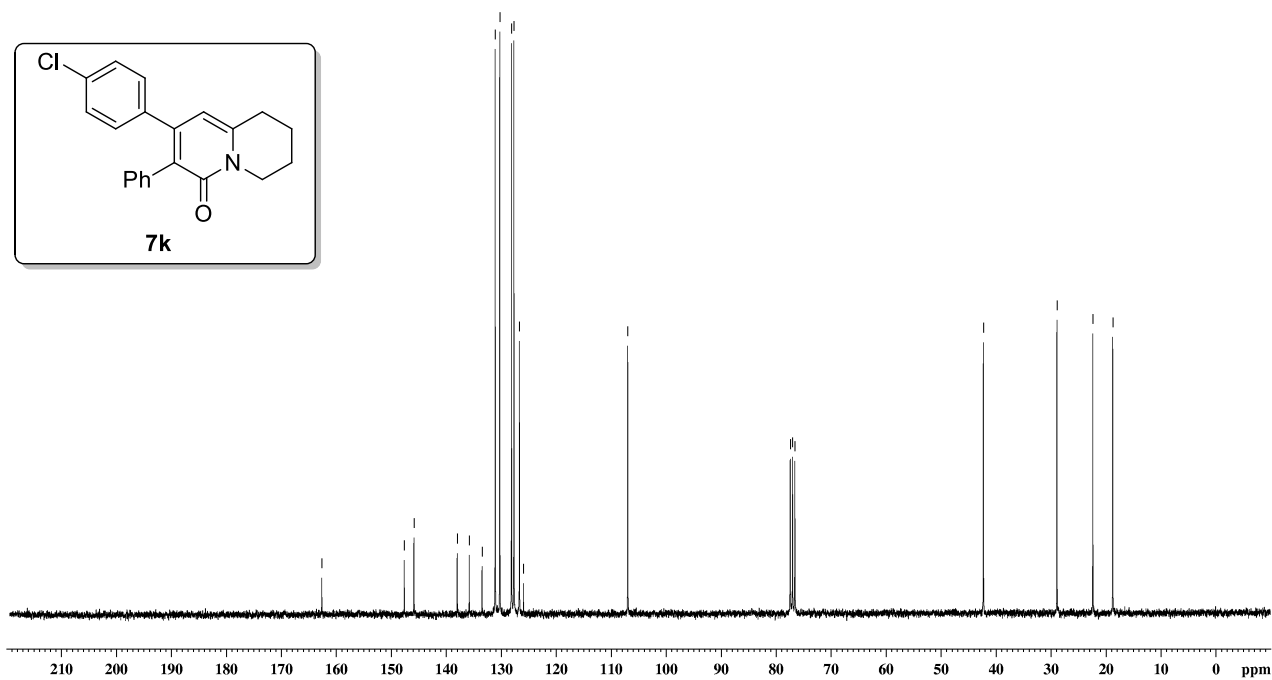

<sup>1</sup>H NMR (300 MHz, CDCl<sub>3</sub>); **7I**

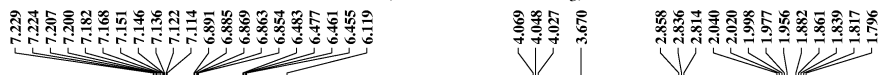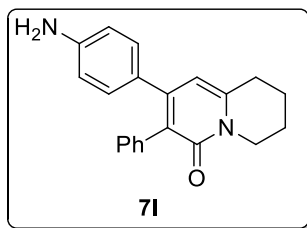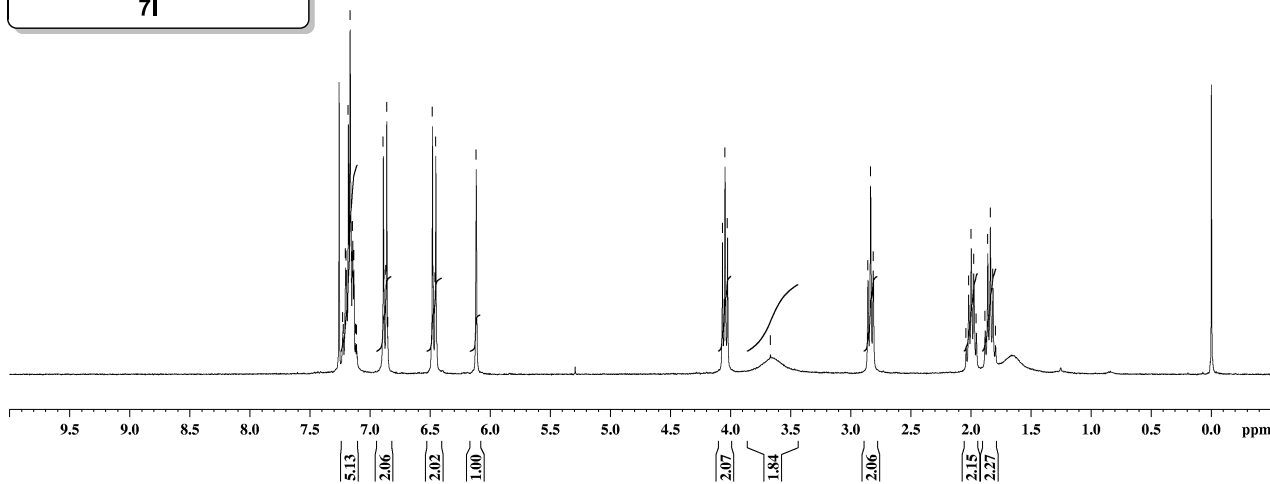

<sup>13</sup>C NMR (75 MHz, CDCl<sub>3</sub>); **7I**

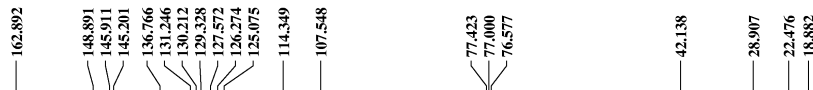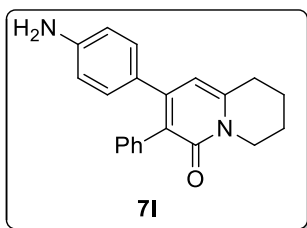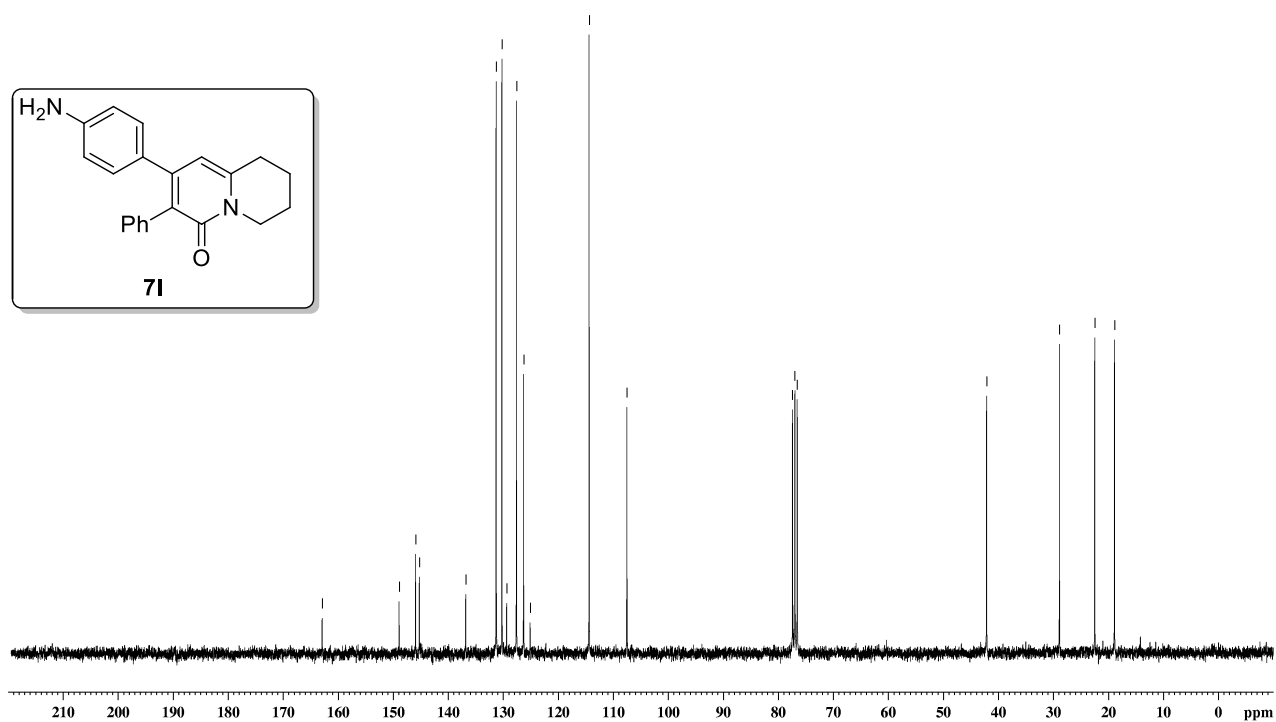

<sup>1</sup>H NMR (300 MHz, CDCl<sub>3</sub>); **7m**

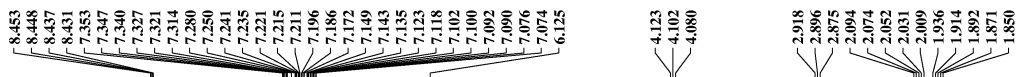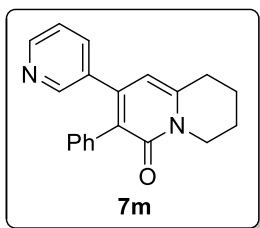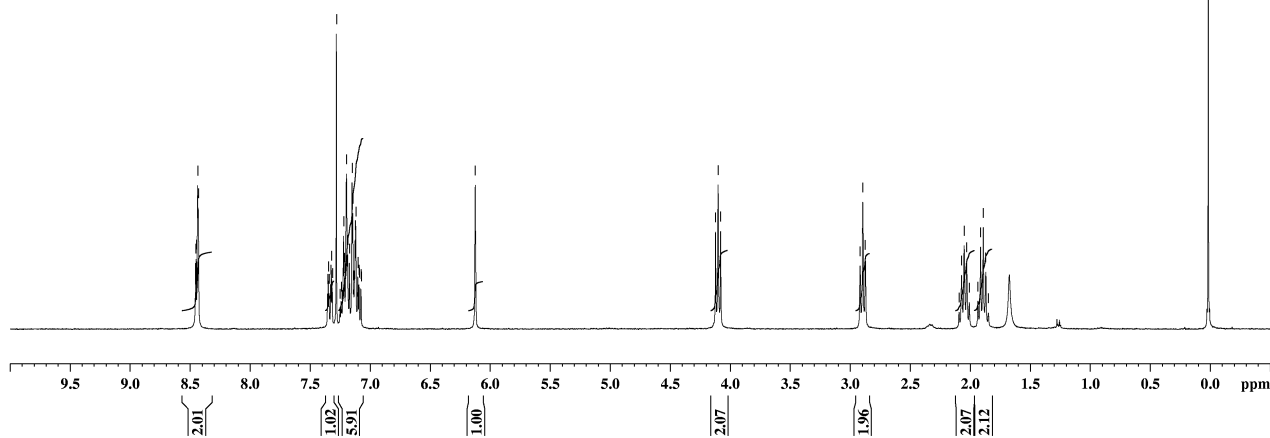

<sup>13</sup>C NMR (75 MHz, CDCl<sub>3</sub>); **7m**

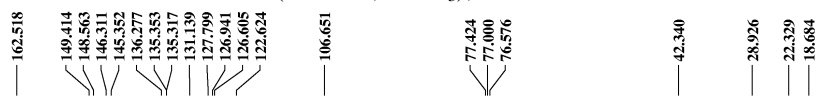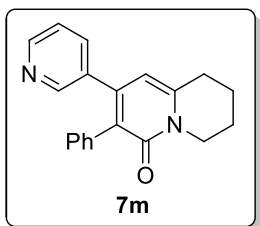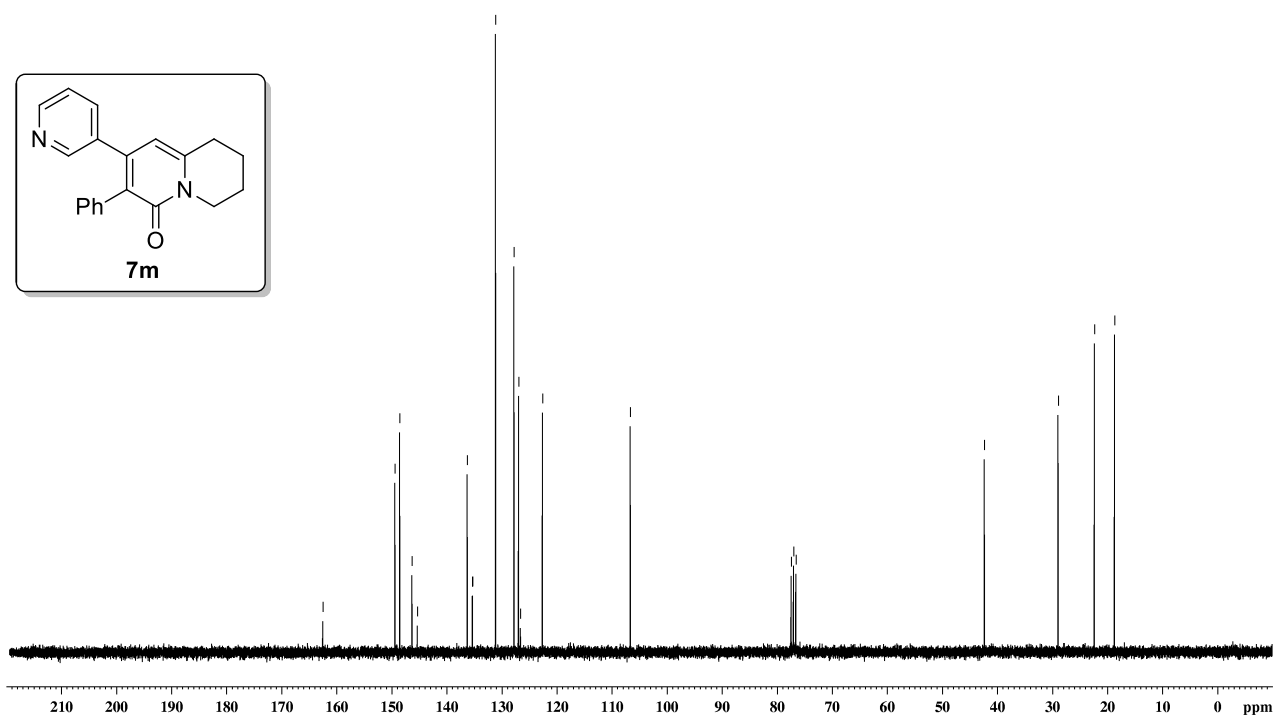

<sup>1</sup>H NMR (300 MHz, CDCl<sub>3</sub>); **7n**

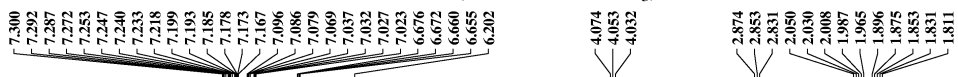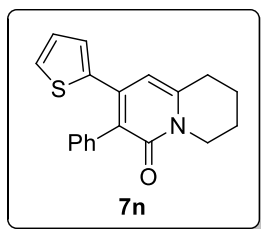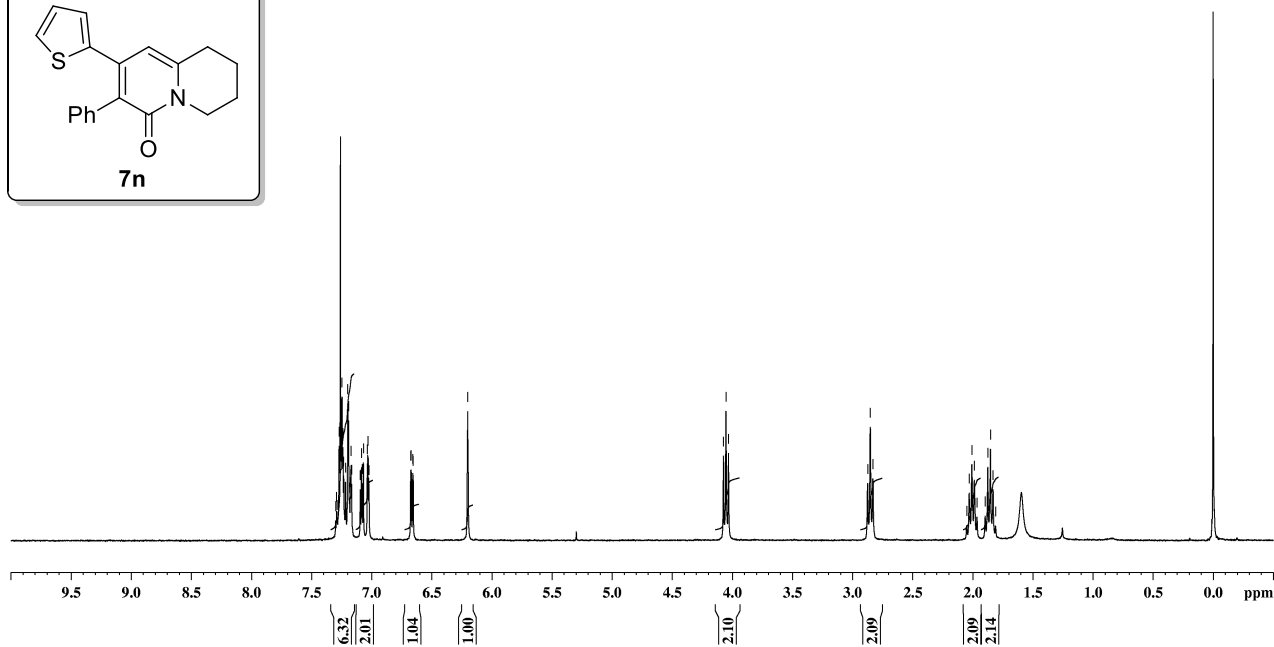

<sup>13</sup>C NMR (75 MHz, CDCl<sub>3</sub>); **7n**

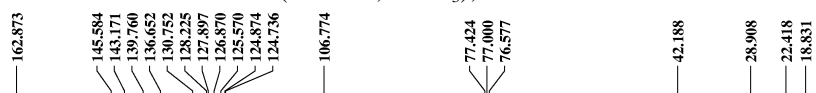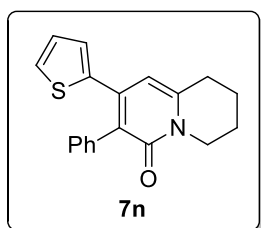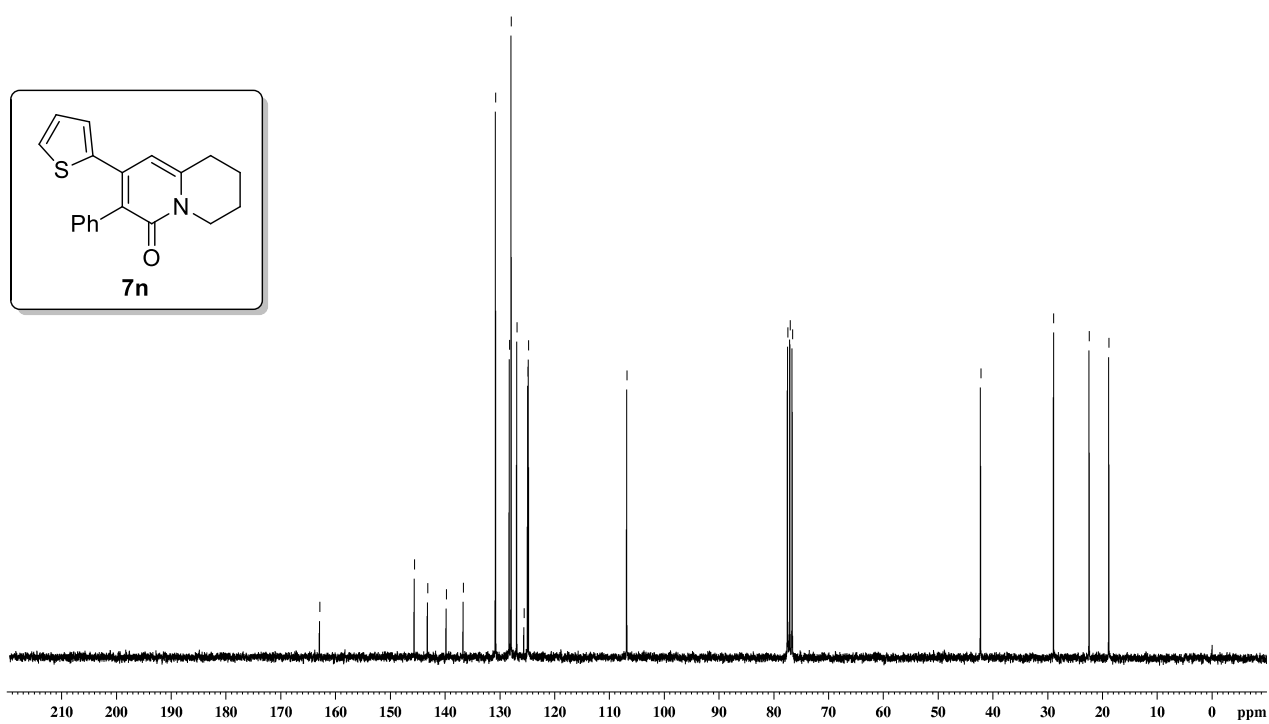

<sup>1</sup>H NMR (300 MHz, CDCl<sub>3</sub>); **7o**

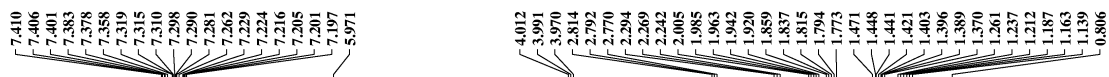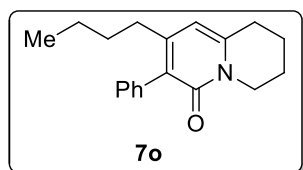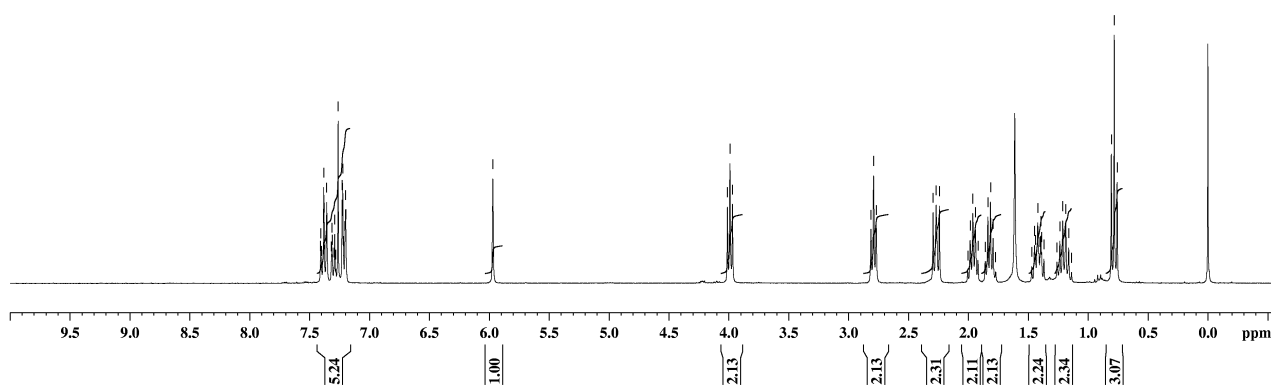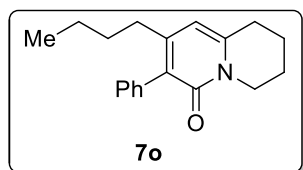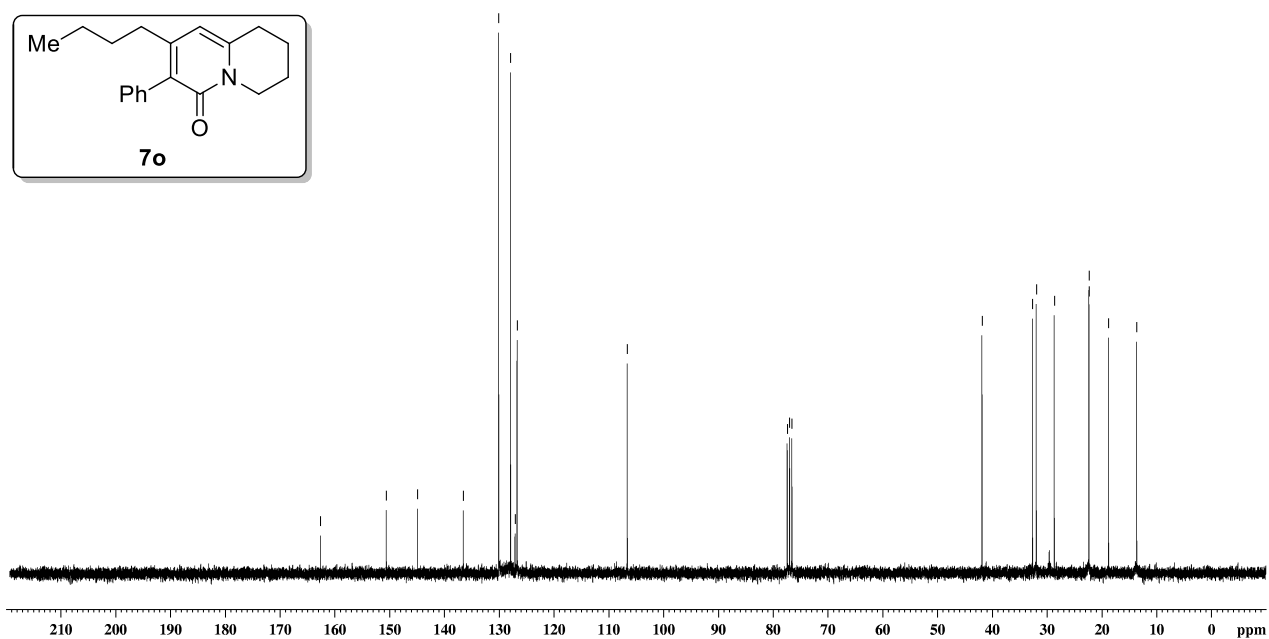

<sup>1</sup>H NMR (300 MHz, CDCl<sub>3</sub>); **7r**

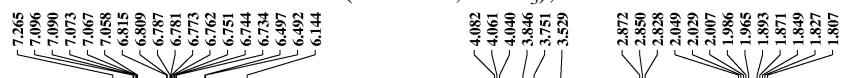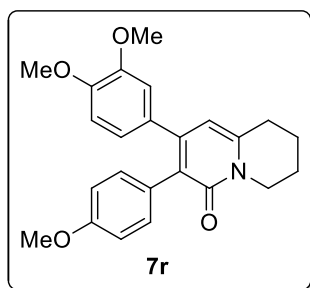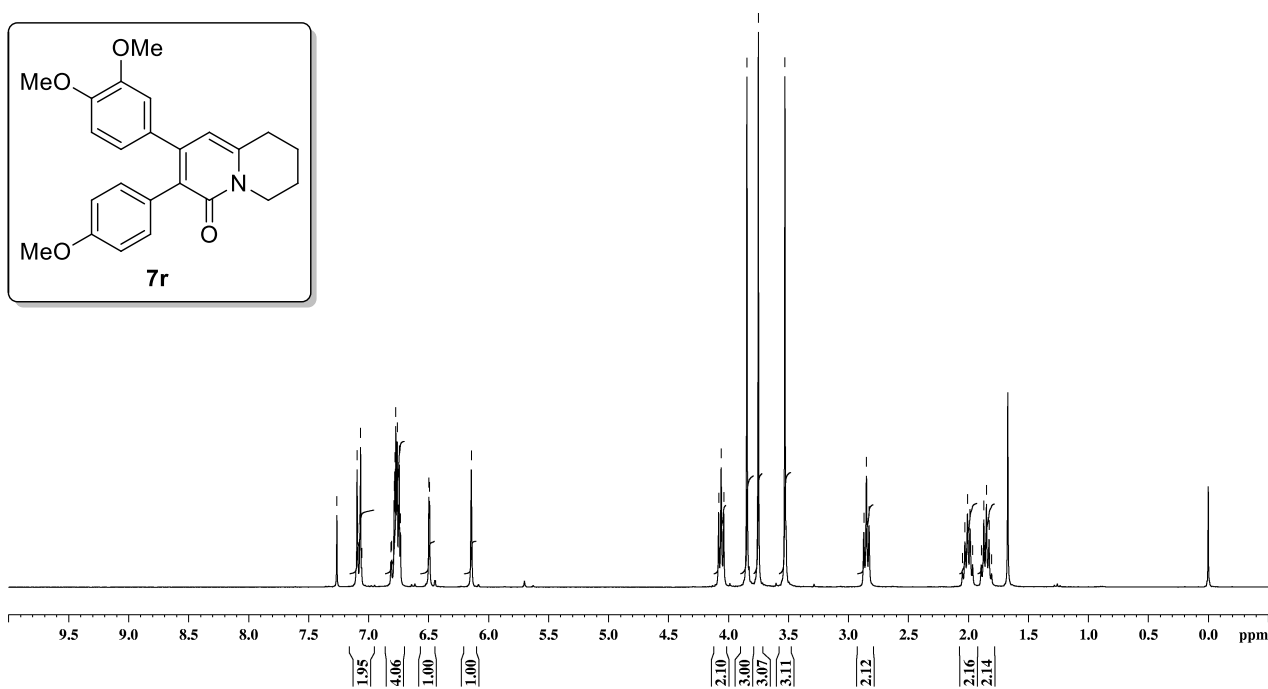

<sup>13</sup>C NMR (75 MHz, CDCl<sub>3</sub>); **7r**

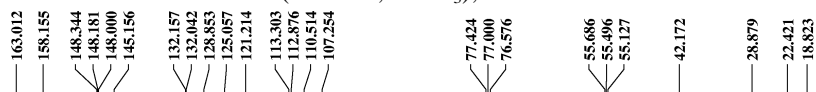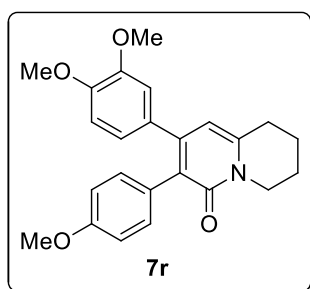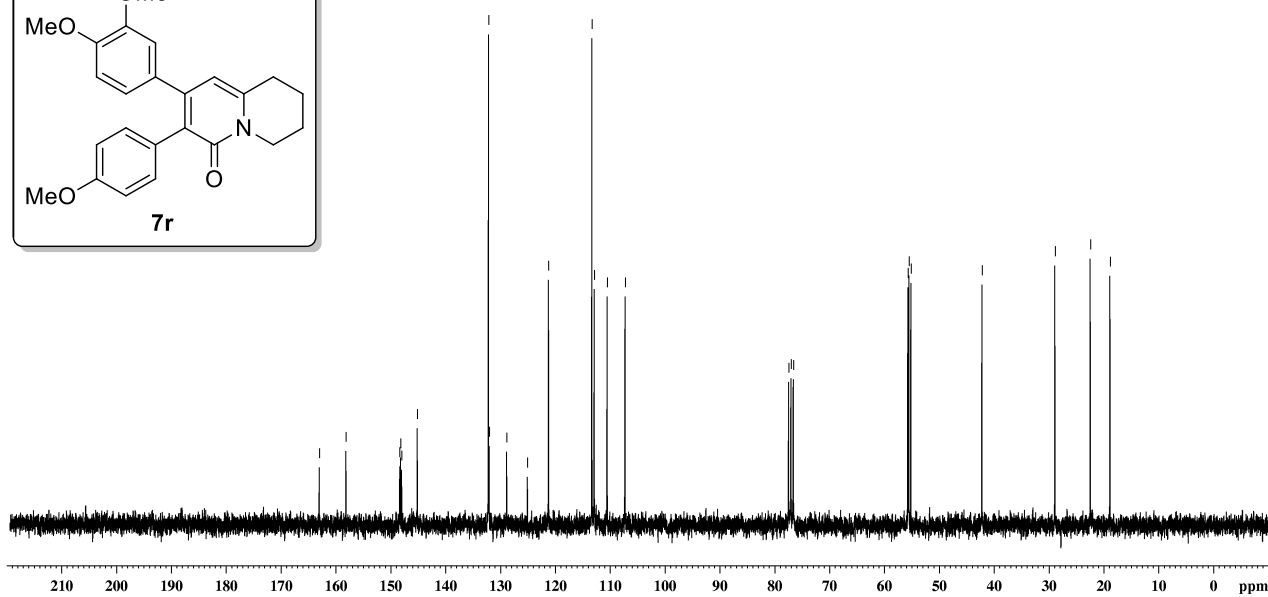

<sup>1</sup>H NMR (300 MHz, CDCl<sub>3</sub>); (±)-**8**

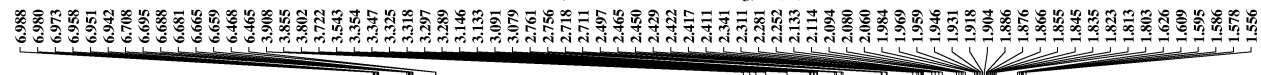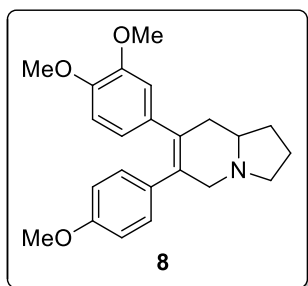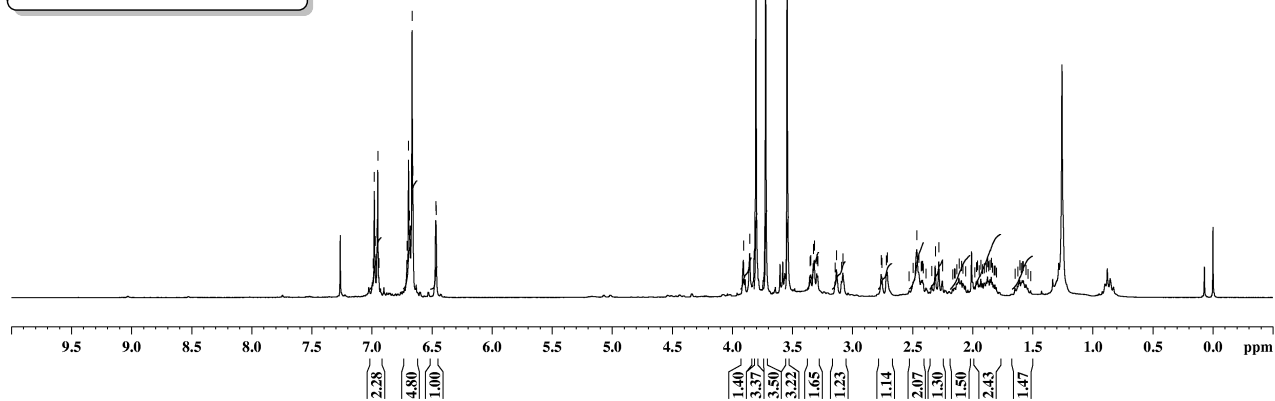

<sup>13</sup>C NMR (75 MHz, CDCl<sub>3</sub>); (±)-**8**

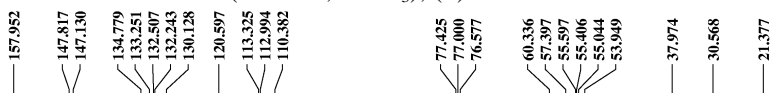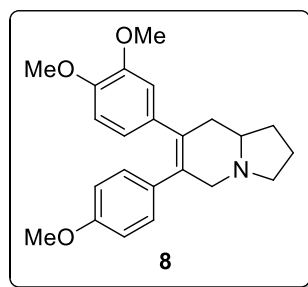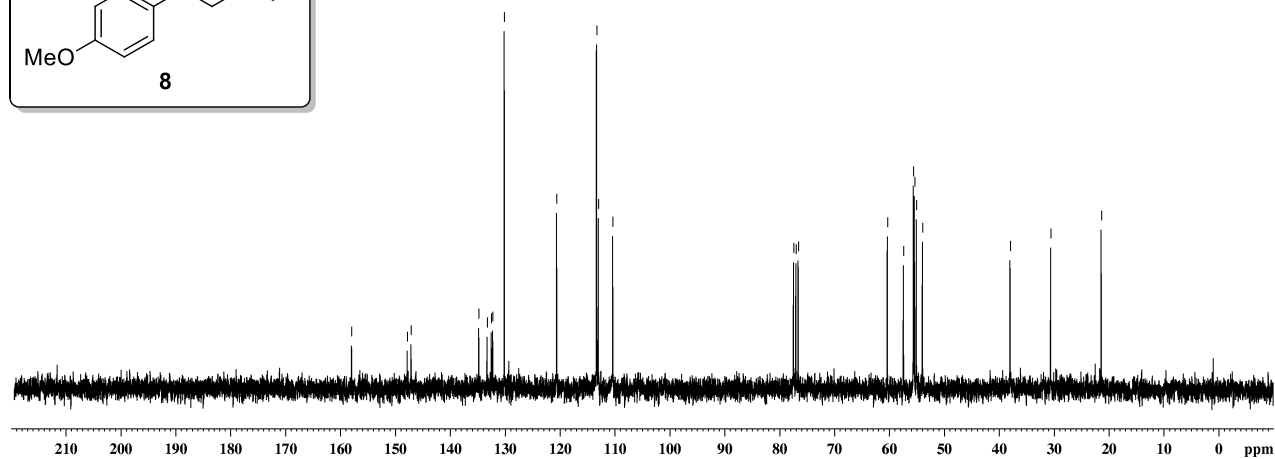

<sup>1</sup>H NMR (300 MHz, CDCl<sub>3</sub>); (±)-**9**

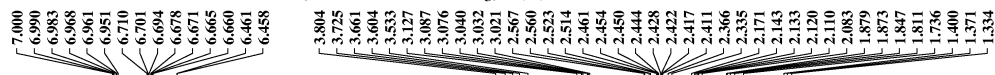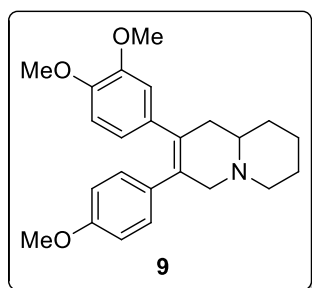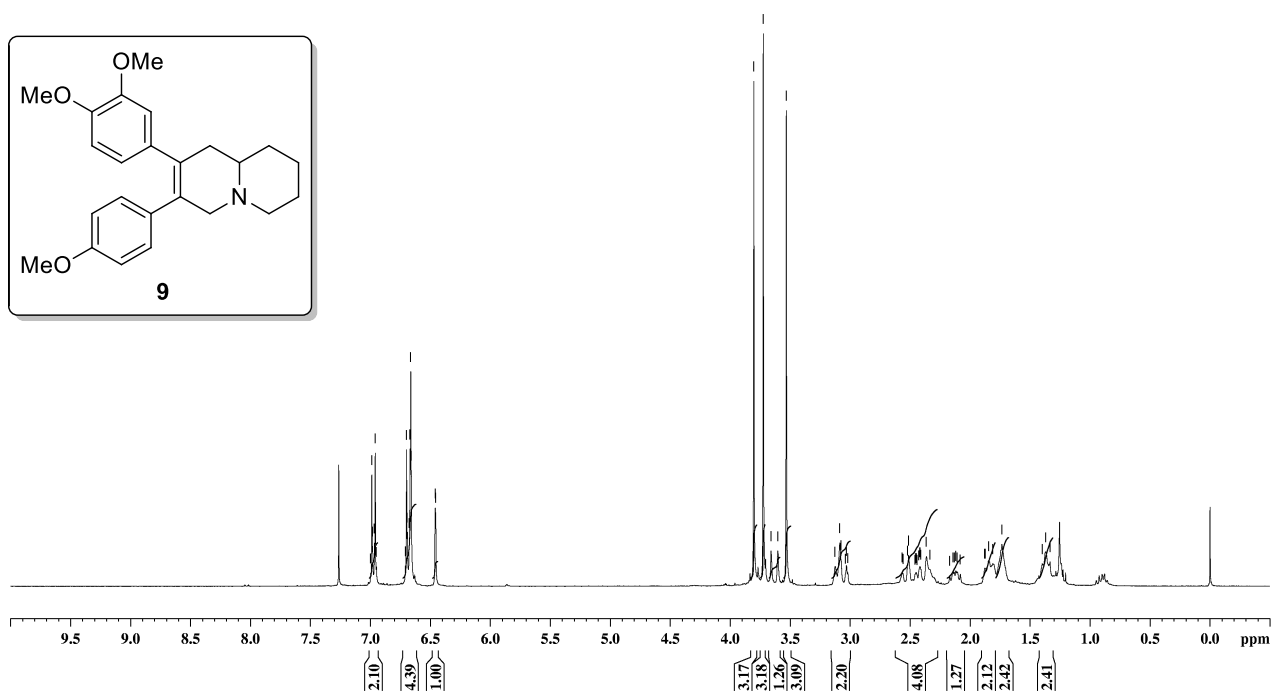

<sup>13</sup>C NMR (75 MHz, CDCl<sub>3</sub>); (±)-**9**

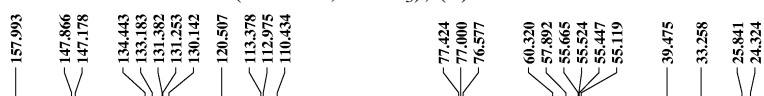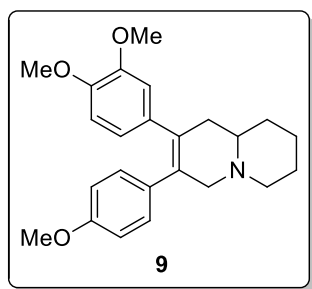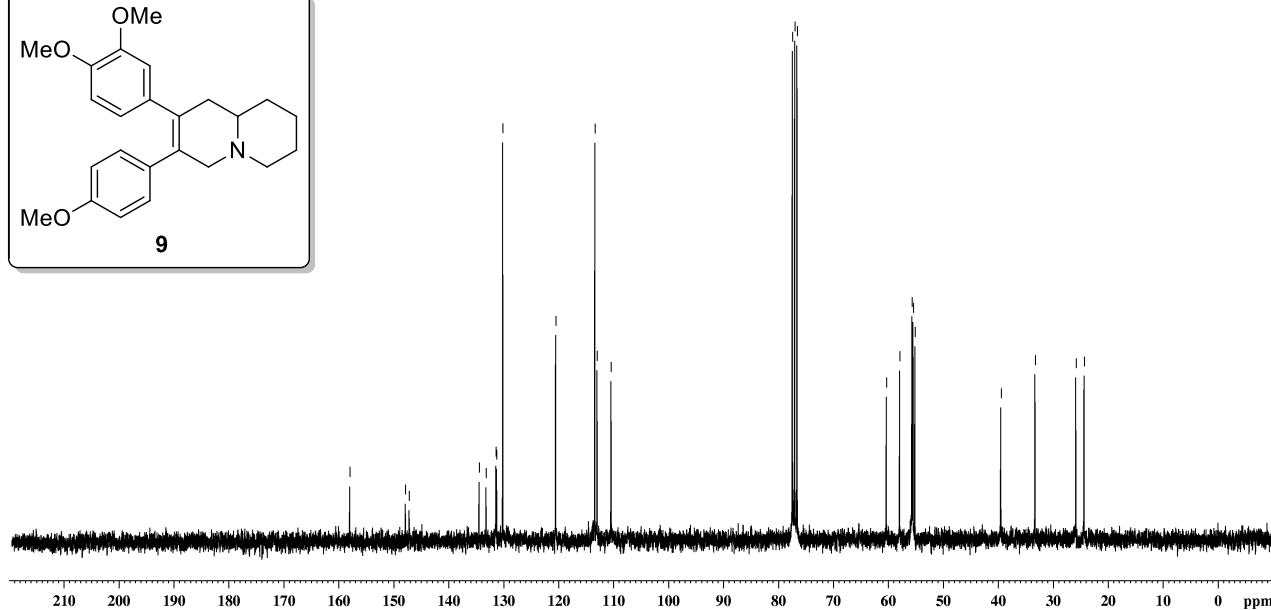



<sup>1</sup>H NMR (300 MHz, CDCl<sub>3</sub>); **10a**

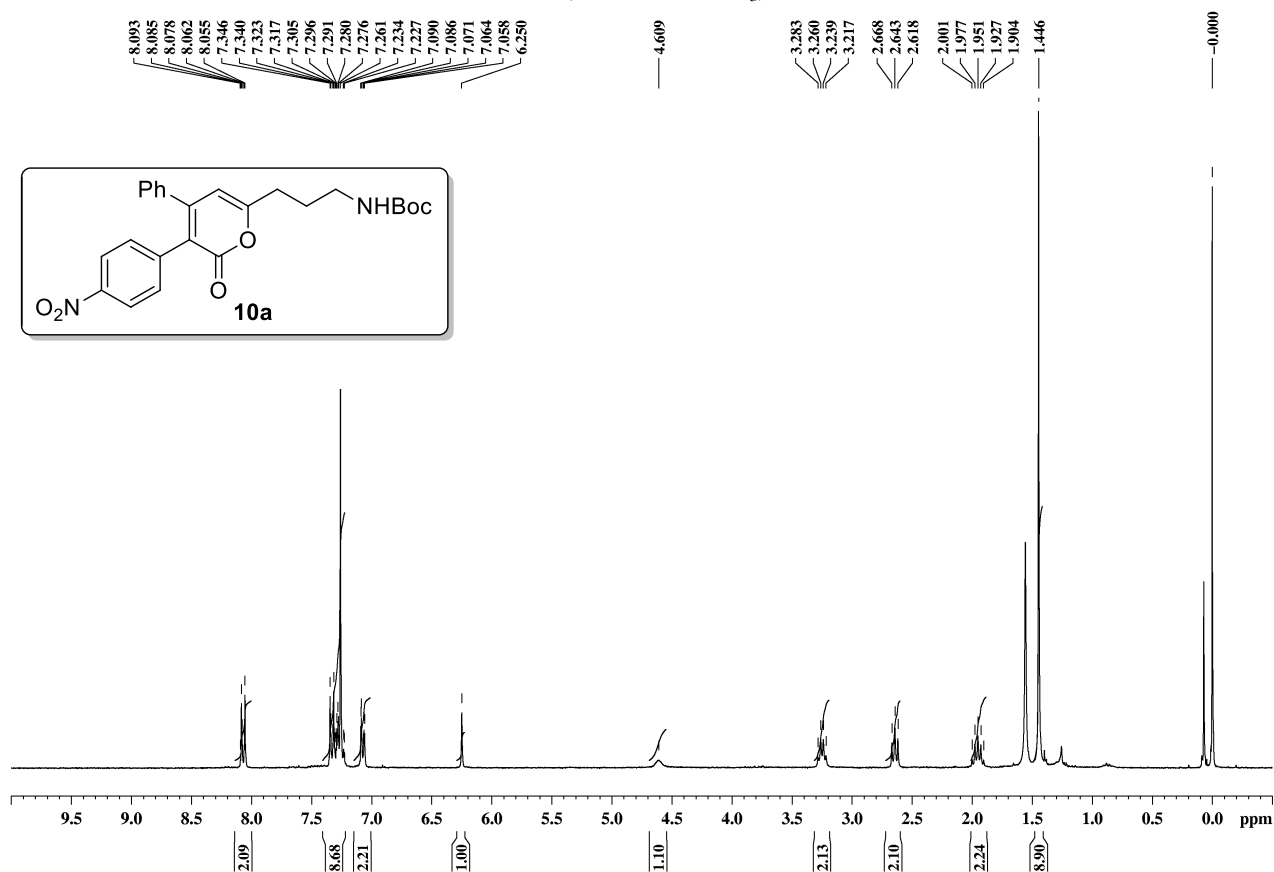

<sup>13</sup>C NMR (75 MHz, CDCl<sub>3</sub>); **10a**

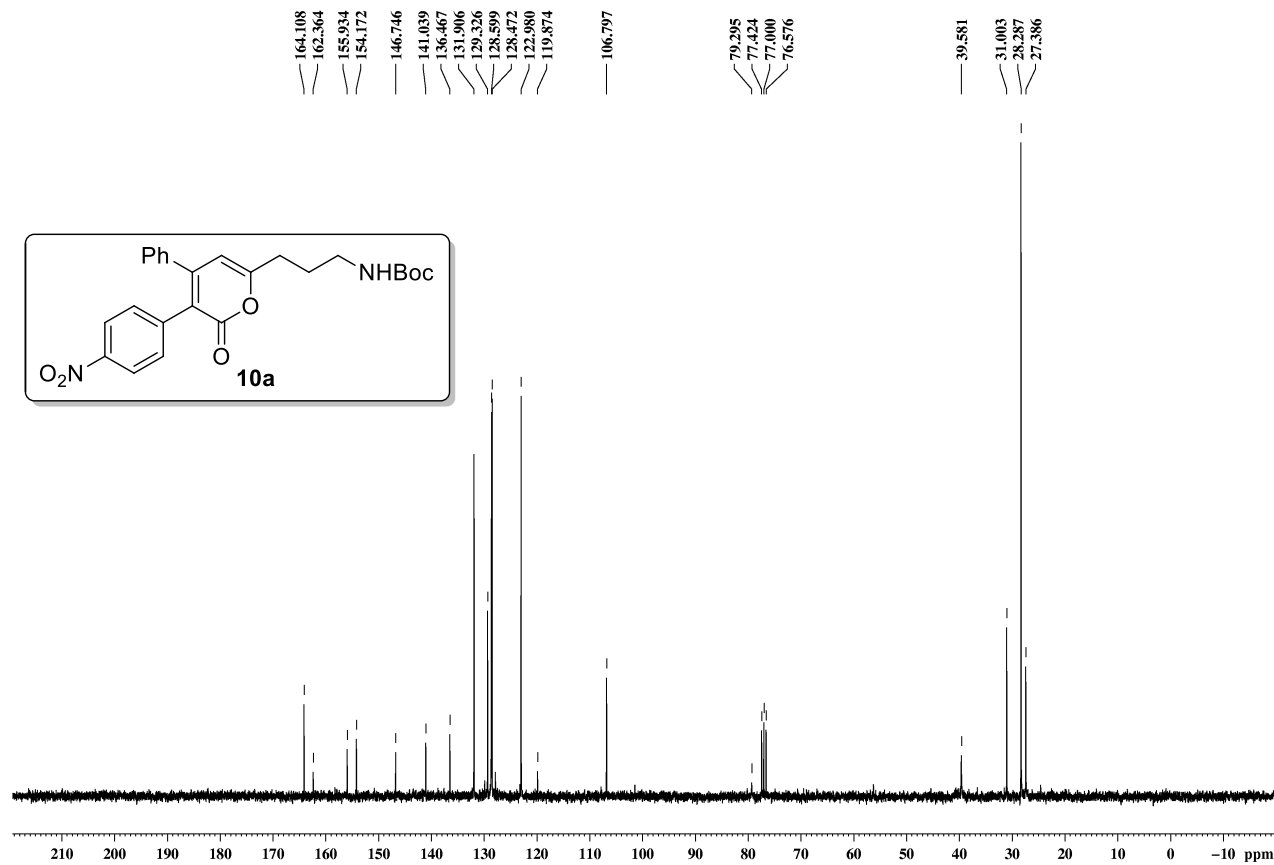

<sup>1</sup>H NMR (300 MHz, CDCl<sub>3</sub>+CD<sub>3</sub>OD); deBoc-10a

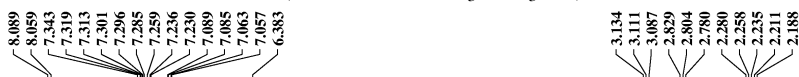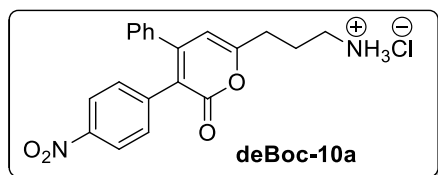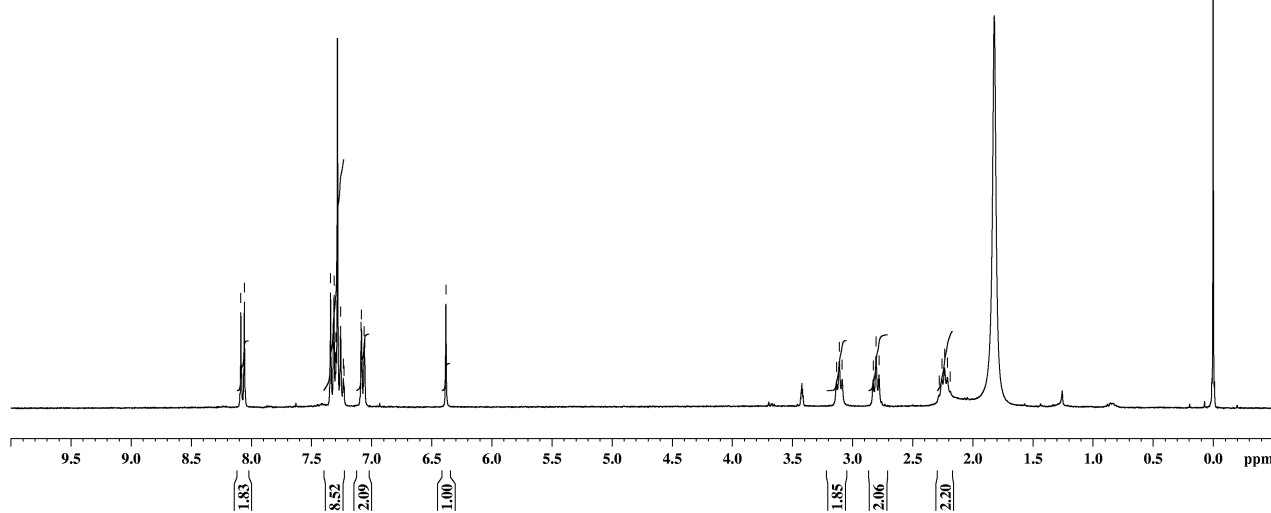

<sup>13</sup>C NMR (75 MHz, CDCl<sub>3</sub>+CD<sub>3</sub>OD); deBoc-10a

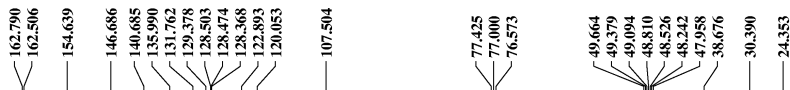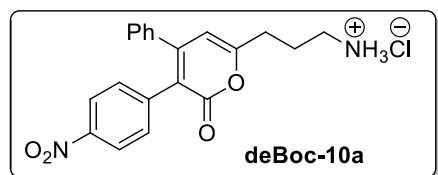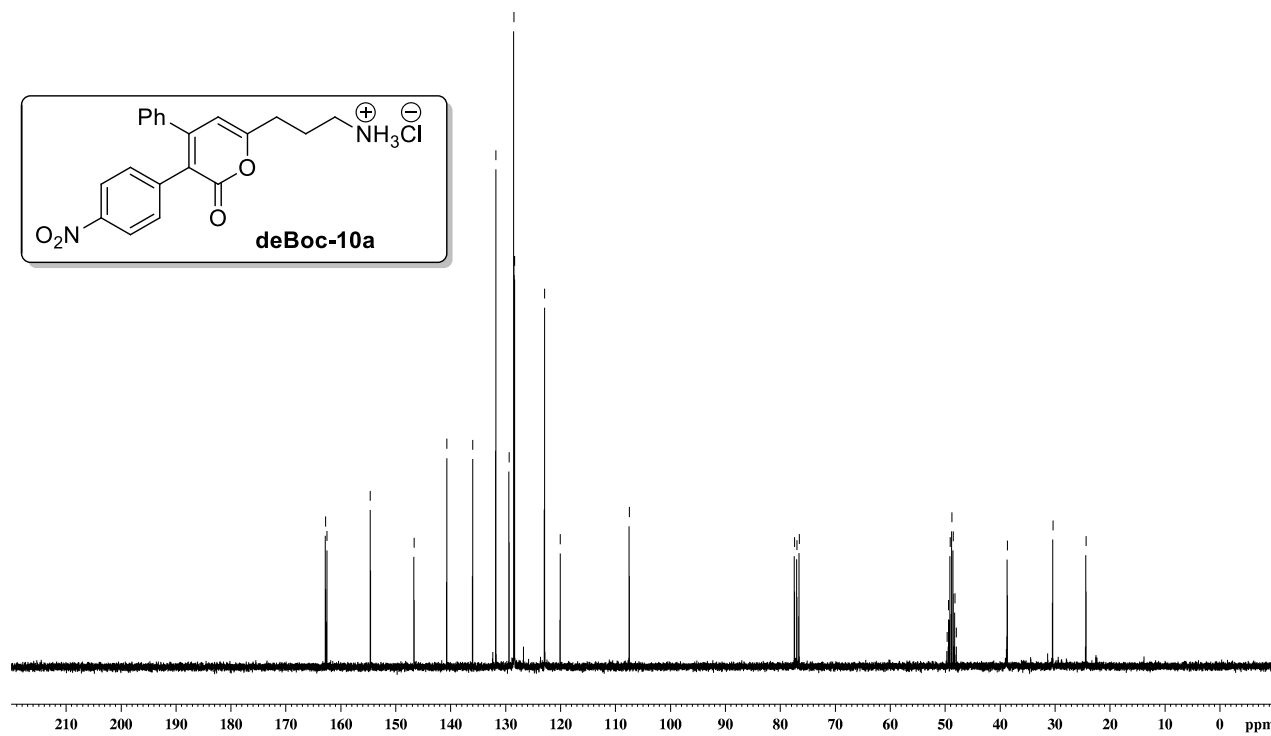

<sup>1</sup>H NMR (300 MHz, CDCl<sub>3</sub>); **11a**

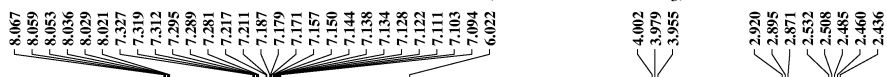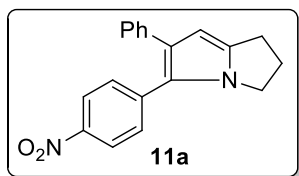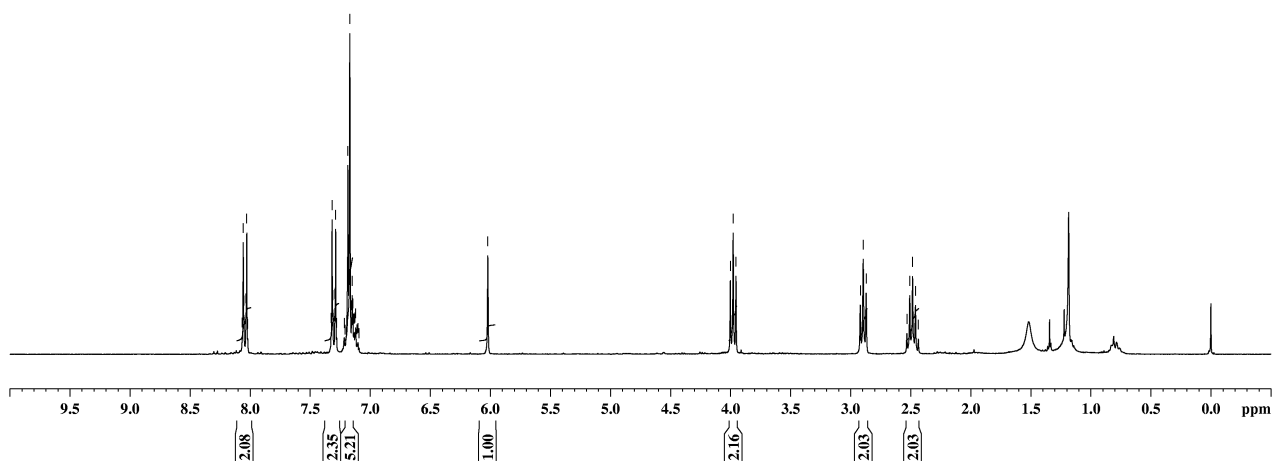

<sup>13</sup>C NMR (75 MHz, CDCl<sub>3</sub>); **11a**

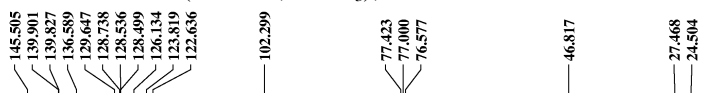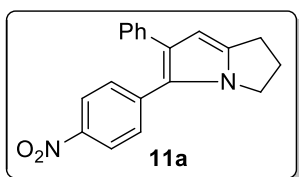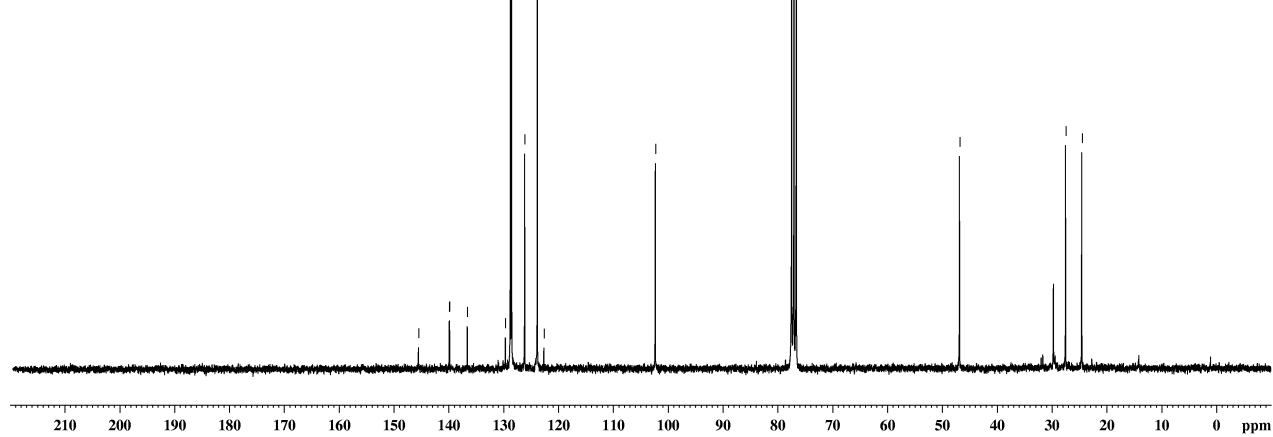

## 9. HPLC spectra for compound 5s

HPLC analysis of **5s** was performed on a DAICEL chiral column (type IC-3) with UV/VIS detection at 254 nm using 40% acetonitrile in water as eluents at flow rate 0.5 mL/min, 25°C.

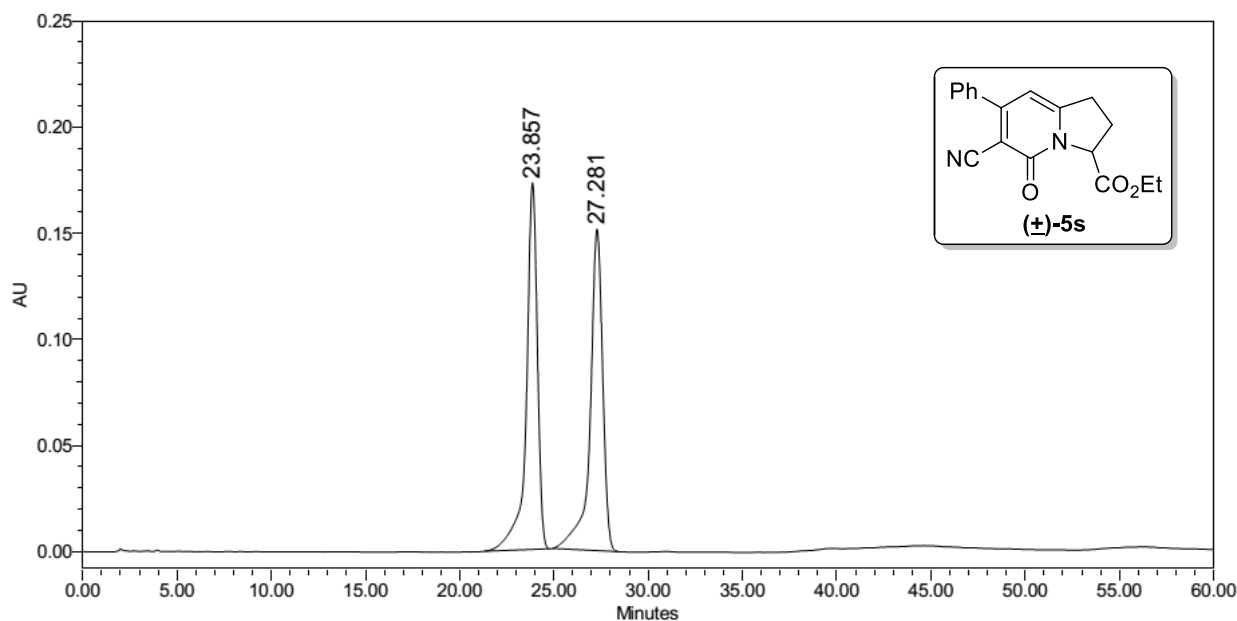

LC Peak Results

|   | RT     | Area    | % Area | Height | % Height |
|---|--------|---------|--------|--------|----------|
| 1 | 23.857 | 7039652 | 50.01  | 172741 | 53.27    |
| 2 | 27.281 | 7036180 | 49.99  | 151524 | 46.73    |

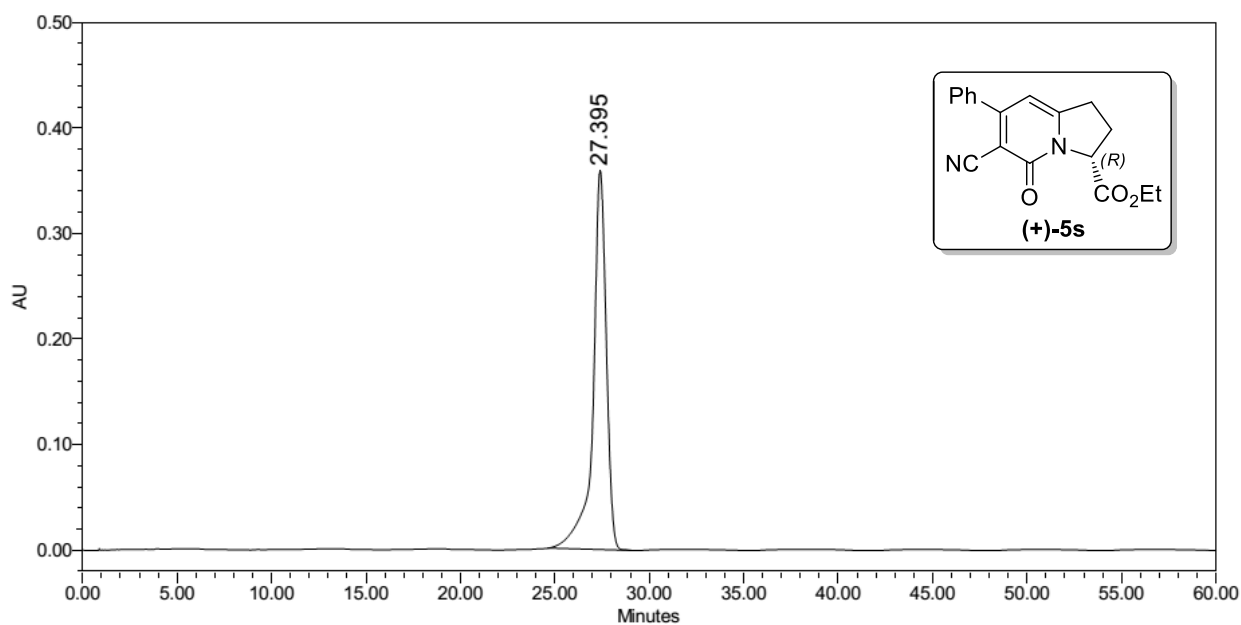

LC Peak Results

|   | RT     | Area     | % Area | Height | % Height |
|---|--------|----------|--------|--------|----------|
| 1 | 27.395 | 17498312 | 100.00 | 359249 | 100.00   |
